# Supplementary material for: RBFOX splicing factors contribute to a broad but selective recapitulation of peripheral tissue splicing patterns in the thymus
Source: PubMed Central journal article supplement (PMC8559713; doi:10.1101/gr.275245.121), 2021-11
Supplement: supp_gr.275245.121_Supplemental_Material_.pdf [file supp_gr.275245.121_Supplemental_Material_.pdf]

## Supplemental Material

### **A transcriptomic census reveals that Rbfox contributes to a broad but selective recapitulation of peripheral tissue splicing patterns in the thymus**

Kathrin Jansen, Noriko Shikama-Dorn, Moustafa Attar, Stefano Maio, Maria Lopopolo, David Buck, Georg A. Holländer, Stephen N. Sansom

#### Contents

- I. Supplemental Methods
- II. Supplemental Figure Legends
- III. Supplemental Tables
- IV. Supplemental References

#### Supplemental Methods

##### **Extraction of thymic epithelial cells and assessment by flow cytometry**

Thymic epithelial cells were extracted as previously described (Dhalla et al. 2020). In short, thymic lobes were incubated with Liberase (Roche) and DNase (Roche) in PBS for 30 min at 37 °C. The cells were incubated with magnetic beads for 15 min at room temperature followed by enrichment of CD45-negative cells using the AutoMACS Pro Separator (Miltenyl Biotech).

Enriched cells were stained with antibodies against CD45-AF700 (1:1000, 30F11; BioLegend), EpCAM-PerCPCy5.5 (1:1000, G8.8; BioLegend), Ly51-PE (1:200, 6C3; BioLegend), UEA-1-Cy5 (1:500, Vector Laboratories, in-house labelled), MHCII-BV421 (1:1000, M5/114.15.2; BioLegend), CD80-PE-Cy5 (1:1000, 16-10A1, Biolegend), CD86-PE-Cy7 (1:1000, GL-1, Biolegend). Staining was performed at 4°C in the dark. DAPI or the LIVE/DEAD Fixable Aqua Dead Cell Stain Kit (Thermo Scientific) was used as a live/dead staining (Supplemental Fig. 21). Cells were sorted using FACS Aria III (BD Bioscience) and data was analyzed using the FlowJo software (version 10.5.0).

Two independent experiments were performed using a total of six 4-6 weeks old mice for each experimental group. Three independent experiments were performed with the double knockout (Rbfox1<sup>lox/lox</sup>; Rbfox2<sup>lox/lox</sup>; cre+/-). For statistical analysis the resulting cell frequencies were combined and two-sided Welch Two Sample *t*-tests were performed between genotypes (Fig. 6B-C, Supplemental Figures 13-15).

### **Isolation of thymocytes and analysis by flow cytometry**

Thymi and spleens were dissected from knockout and wildtype mice and isolated by gently dissociating the tissues between two frosted glass slides. Cells were filtered and resuspended in PBS containing 2% FCS (Merck) and stained with a combination of the markers given in Supplemental Table 12. The staining for surface markers was performed for 20 min at 4 °C in the dark. The cell viability was assessed using the LIVE/DEAD Fixable Aqua Dead Cell Stain Kit (ThermoFisher Scientific) according to the manufacturer's instructions. Cells were acquired using FACS Aria III (BD Bioscience) and data was analyzed using FlowJo software (version 10.5.0). As described above, n=2 independent experiments were performed and statistical analysis were performed on combined data (Supplemental Fig. 16).

### **Preparation and staining of samples for confocal microscopy**

Freshly dissected thymus lobes were frozen in OCT (Tissue Trek) and 8 µm tissue sections were cut using a Cryostat (Thermo Scientific CryoStar NX70 with MB DynaSharp Microtome Blade). The tissue sections were fixed for 20 min in 1.4 % PFA (Sigma, in 1xPBS) and for 10 min in Methanol (VWR). Sections were permeabilized for 10 min with 0.3 % Triton-X (Sigma, in 1xPBS). These steps were followed by one 5 min washing step in 1xPBS, marking of the individual sections by a hydrophobic PAP pen (Sigma) and two further 5 min washing steps of each individual section. The primary antibodies were diluted in 1xPBS containing 10% goat serum, 0.3% Triton-X and incubated for 45 min at 37 °C. Primary antibodies were directed against AIRE (5H12, eBioscience, 1:500) and the RRM domain (1:500). In addition, UEA-1 was used for identifying mTEC (1:150, Vector Laboratories, in-house labelled). After three washing steps, the secondary antibody was added (diluted 1:500 in 1xPBS, goat α rabbit- AF488 (Invitrogen), goat α rat- AF555 (Invitrogen))

and incubated for 30 min at 37 °C. After three washing steps, sections were exposed for 90 min to the lectin UEA-1 at 37°C followed by two additional washing steps and finally DAPI staining of nuclei (10 min, 1:10,000 dilution in methanol). After a final washing step slides were mounted using ProLong Gold antifade reagent (Invitrogen).

### **Long-read RNA-sequencing**

After RNA extraction, 8µl of RNA was prepared for sequencing using the cDNA-PCR Sequencing Kit (SQK-PCS108, ONT) following manufacturer's protocol (version: PCS\_9035\_v108\_revF\_26Jun2017; update: 31/05/2018). cDNA libraries were amplified for 18 cycles and normalized to 400 fmol before sequencing on MinION flow cells (FLO-MIN 106 R9.4) for 48 hrs.

### **Computational methods**

#### **Publicly-available RNA-sequencing datasets**

RNA-sequencing data for the 21 peripheral mouse tissues were obtained from the ENCODE Project (GSE36025; keeping only the colon samples to represent the large intestine). RNA-sequencing from skin epithelial cells, mTEC and cTEC (GSE44945) (St-Pierre et al. 2013), cTEC (GSE53111) (Sansom et al. 2014), and single mature mTEC (GSE114713) (Handel et al. 2018) was obtained from the Gene Expression Omnibus (GEO). Independent RNA-sequencing datasets for peripheral mouse tissues (GSE41637, (Merkin et al. 2012)) as well as MHCII high and low adult mTEC (GSE68190, (Chuprin et al. 2015)) were downloaded from GEO.

#### **Generation of the mT&T transcriptome assembly**

Sequence reads were trimmed to 76 bp (fastx trimmer v0.0.14) and mapped with HISAT2 (Kim et al. 2019) (v2.1.0; Ensembl mm10-v91; settings: "--dta --score -min L,0.0,-0.2 --rna-strandness RF"). To generate a single high-depth sample for each tissue and TEC population replicate samples were combined and downsampled to 200M reads (samtools (Li et al. 2009) v1.3.1; Supplemental Table 1).

Separate reference-guided assemblies were constructed for each ENCODE tissue or TEC population using the high-depth samples (StringTie (Pertea et al. 2015) v1.3.3b; Ensembl mm10-v91). To identify transcripts that were reproducibly detected we first prepared biological replicate sample pools for each tissue and TEC population (n=2; 60M reads/samples, Supplemental Table 1). Expression of the transcripts present in each of the assemblies was then quantified in the relevant tissue or TEC population using the two 60M replicates (Salmon (Patro et al. 2017), v0.11.3, with parameters: “--incompatPrior=0 --validateMappings --rangeFactorizationBins=4 --seqBias --gcBias -x 0.66”). We then implemented and applied a robust procedure based on computation of the non-parametric Irreproducibility Discovery Rate (npIDR)(Dobin et al. 2013; Pervouchine et al. 2015) (details below and Supplemental Fig. 1). Transcripts from each tissue or TEC population that were reproducibly detected according to this procedure (those expressed above a level determined to correspond to  $\text{npIDR} \leq 0.1$ ) were merged into a single unified assembly (StringTie, Ensembl reference annotation guided merge). Transcripts contained in reference introns, possible polymerase run-on fragments, repeats, transcripts overlapping opposite-strand exons or introns and possible pre-mRNA fragments were removed (gffcompare v.0.10.6, class codes ‘irpxse’). To be included in the final mT&T assembly, the merged transcript models were additionally required to be reproducibly detected (i.e. expressed above a level determined to correspond to  $\text{npIDR} \leq 0.1$ ; npIDR was determined as described above) in at least one tissue or TEC population.

The final mT&T assembly was used as the annotation for all subsequent steps if not otherwise indicated.

### **Quantification of gene and transcript expression levels**

For comparisons of gene and transcript expression between the ENCODE tissues and the TEC populations samples (generated for this study) the trimmed 76bp sequences were deduplicated (Picard v2.10.9), filtered to exclude unmapped reads, and down-sampled to common read depths. For comparisons of gene and transcript expression between the Merkin et al. mouse tissues (Merkin et al. 2012) and the St-Pierre and Chuprin TEC samples (St-Pierre et al. 2013; Chuprin et al. 2015) sequence reads were trimmed to 50 bp, deduplicated, filtered to exclude unmapped

reads, and down-sampled to common read depths. Transcripts-per-million (TPM) values were obtained using Salmon with an index created from the new mT&T assembly (k=31 for index, settings: "ISR --gcBias") and upper-quartile normalized. Reads were counted by featureCounts (Liao et al. 2014) (v1.6.0).

RNA-sequencing reads from the *Rbfox1* and *Rbfox2* tKO mice were not trimmed but were otherwise mapped, deduplicated, filtered to remove unmapped reads, downsampled and quantitated as described above (retaining 14.5M and 10M paired-end reads/replicate for mature and immature mTEC, respectively).

### **Procedure for identification of reproducibly detected transcripts**

To identify reproducibly detected transcripts, we implemented a robust procedure based on the npIDR metric (Dobin et al. 2013; Pervouchine et al. 2015) because we noted very lowly expressed transcripts to frequently pass a naïve npIDR filter (data not shown). TPM values were first log<sub>10</sub> transformed (after addition of a small pseudocount = 0.001) and extreme values ( $x < 0.5$  or  $x > 0.95$  expression quantile) were removed to avoid issues arising from data sparsity. Data were then binned (n=50 bins) and npIDR values for each bin computed as previously described (Pervouchine et al. 2015). To estimate the expression level above which transcripts could be reliably detected we modelled the TPM vs npIDR relationship by LOESS regression. The fitted curve was used to estimate the TPM value that corresponded to  $\text{npIDR} \leq 0.1$ . The analysis was performed separately for each TEC and peripheral tissue (with n = 2 biological replicate sample pools). Determination of the TPM threshold above which transcripts were reproducibly detected in the adrenal samples is shown in Supplemental Fig 1A-B. The TPM thresholds determined for each of the TEC and tissue samples are shown in Supplemental Fig 1C. This procedure was more consistent and conservative for our datasets than the use of per-transcript npIDR values (data not shown).

### **Identification of novel tissue-restricted transcripts**

Novel transcripts were defined as those without a match in the Ensembl annotation (as assessed with gffcompare). Tissue-restricted novel transcripts were identified as those with  $\text{tau} > 0.99$

(Kryuchkova-Mostacci and Robinson-Rechavi 2017) in the representative tissues (Supplemental Fig. 3A) and wildtype mature mTEC. In addition, they were required to have an expression level that was >2 fold higher in a single representative tissue vs all of the other representative tissues (Fig. 3B and Supplemental Fig. 8). *Tau* values were computed using upper-quartile normalised,  $\log_2(n+1)$  transformed TPM values from the representative tissues. Novel transcripts were annotated using the *generateEvents* function in SUPPA (Alamancos et al. 2015) (v2.3) (Fig. 3C).

### Identification of tissue-restricted antigen and *Aire*-regulated genes

Tissue-restricted antigen (TRA) genes were defined as the set of protein-coding genes that showed evidence of tissue restricted expression amongst the ENCODE tissues and wildtype mTEC samples. To avoid representation bias when computing expression specificity, we first identified groups of similar peripheral tissues by hierarchically clustering the tissues according to their transcript expression profiles. One tissue was then selected to represent each of the groups identified (Supplemental Fig. 3A). The set of TRA genes was defined as the set of genes with *tau* values > 0.7 in the representative tissues and wildtype immature and mature mTEC samples (Supplemental Fig. 3B) (Kryuchkova-Mostacci and Robinson-Rechavi 2017). To associate TRA genes with individual tissues we constructed a family (*F*) of non-overlapping TRA gene subsets which we termed “iTRA” by assigning TRA genes to the tissue in which they were most highly expressed. In summary,  $F_{iTRA} = \{iTRA_{tissue-i}, \dots, iTRA_{tissue-n}\}$  where  $iTRA_{tissue-i}$  comprises the subset of TRA genes with highest expression in tissue *i*. As a concrete example, the adrenal iTRA subset (denoted  $iTRA_{adrenal}$  or simply “adrenal iTRA”) contains the subset of TRA genes that were more highly expressed in the adrenal tissue than in any other peripheral tissue. *Aire*-regulated genes were defined as those significantly downregulated more than 2-fold in the homozygous *Aire*-knockout mTEC relative to heterozygous *Aire*-knockout mTEC (BH adjusted  $p < 0.05$ , DESeq2 (Love et al. 2014) analysis,  $n=2$  biological replicates, Supplemental Fig. 3C). For the identification of *Aire*-regulated genes in mTEC untrimmed, full-depth sequence data was mapped (as above) and quantified using featureCounts (Ensembl v91). In total, we identified  $n=3,889$  *Aire*-regulated tissue-restricted antigen genes (*Aire*-TRA),  $n=5,266$  other tissue-restricted antigen genes (non-*Aire* TRA) and  $n=12,885$  non-TRA genes (Supplemental Fig. 3D and Supplemental Table 2).

For comparisons of gene and transcript expression between the Merkin et al. data of mouse peripheral tissues (Merkin et al. 2012) and the corresponding data from St-Pierre et al. and Chuprin et al. TEC samples (St-Pierre et al. 2013; Chuprin et al. 2015) TRAs were identified as genes with a *tau* value > 0.7 in the Merkin et al. peripheral tissues (as applied to the upper-quartile normalised,  $\log_2(n+1)$  transformed TPM values). Subsets of iTRAs were then identified for these tissues following the approach described above for the ENCODE tissues.

### **Assessment of differential splicing and splice junctions**

Differential splicing events were identified using rMATS (Shen et al. 2014) (v3.2.5; default settings, filtered for  $FDR < 0.05$ ; mapping with mT&T assembly as annotation). Exon percentage spliced-in (PSI) values were computed using SUPPA (3' and 5' UTR regions excluded; event-centric mode). For Fig. 4A, two biological replicate TEC samples (each from multiple thymi) with 130 Mio reads each were used. For Supplemental Fig. 9A, rMATS was run using two biological replicate samples (each from individual animals) with 19.5 Mio reads each for the peripheral tissue or TEC. Details of the samples and RNA-sequencing strategy for the rMATS alternative splicing analyses are summarised in Supplemental Table 14.

Splice junctions (SJs) were counted using SJcounts (v3.1; settings: "-maxnh 1 -read1 0 -read2 1") (Pervouchine et al. 2013) using 50M trimmed (76bp), deduplicated, mapped reads/sample. The results were post-processed to split the multi-junction counts into individual junction counts for final quantitation. SJs were assigned to genes by separately intersecting their start coordinates ( $\pm 3bp$ ) and end coordinates ( $\pm 3bp$ ) with exon coordinates extracted from protein-coding transcripts (Ensembl v91, bedtools window (v2.25.0)). Only SJs for which both the start and end coordinates intersected with exons from protein-coding transcripts from the same protein-coding gene were included in downstream analyses. For Fig. 2, and Supplemental Fig. 5 the numbers of unique SJs per gene were summarised. Significant differences in the number of unique junction counts were identified using edgeR (v3.32.0, with housekeeping genes used to estimate dispersion from the single replicates). For this analysis the set of mouse housekeeping genes was defined as  $n=473$

genes which were 1:1 orthologs of a published set of human housekeeping genes (de Jonge et al. 2007). Differences in junction number were considered significant if they showed a two-fold change in number and an FDR < 0.05.

### **Definition of *Aire*-regulated transcripts**

Differential transcript expression between *Aire*-knockout and *Aire*-positive mTEC was assessed using kallisto (Bray et al. 2016) (v0.43.1, n=1,000 bootstraps, Ensembl v91) and the sleuth R package (Pimentel et al. 2017) (v0.29). A value of the sleuth 'b' parameter of log(1.77) was determined to correspond to a 2-fold change (by modelling of actual expression values from kallisto). Transcript lengths were obtained using the function *transcriptLengths* from the R package Genomic Features (v1.30.3).

### **Analysis of ONT data**

Basecalling of ONT raw tracks was performed using Albacore (v2.1.10) and 'pass' reads (mean quality score of < 7) were trimmed using Porechop (v0.2.3). Merged reads were mapped with minimap2 (Li 2018) (v2.9-r720, settings: "-L -ax splice", mm10 genome). Alignments were filtered for mapping quality > 20. The number of splices per read and gap-compressed identity ('de' tag) were extracted from the resulting bam file. Gene expression was quantified using featureCounts (settings: "-s 0 -L -fracOverlap 0.8"). Validation of novel mT&T transcripts was performed after first excluding mT&T transcripts with retained introns (defined by SUPPA) and mT&T transcripts arising from genomic loci with overlapping gene models (on opposite strands).

### **Definition of tissue-restricted splicing-related factors**

To assess the expression of splicing-related genes in ENCODE tissues and TEC populations, we compiled a list of known splicing related genes from (i) literature sources (Barbosa-Morais et al. 2006; Grosso et al. 2008; Chen and Manley 2009; Merkin et al. 2012; Han et al. 2013; Jangi and Sharp 2014; St-Pierre et al. 2015), (ii) the RNA-binding protein database (RBPDB) (Cook et al. 2011) and (iii) relevant Gene Ontology (GO) categories. From the RBPDB database (<http://rbpdb.cabr.utoronto.ca/>, downloaded 1<sup>st</sup> June 2018) we included the mouse RNA-binding



protein genes. Genes were included from GO categories that matched the string 'splic' (but not 'tRNA' or 'protein splicing'). GO data was retrieved from AmiGO or the GO Online SQL Environment (GOOSE) database (Carbon et al. 2009) (downloaded 29<sup>th</sup> May 2018). Tissue-restricted splicing-related genes were then identified as those with  $\tau > 0.5$  in the TEC and peripheral tissue samples.

### **Analysis of single-cell RNA-sequencing data**

The data (GSE114713) was mapped (HISAT2, parameters: "--dta --score-min L,0.0,-0.2"), quality controlled and quantitated (Cufflinks v2.21, featureCounts, Ensembl v91) using pipeline\_scrnaseq.py (<https://github.com/sansomlab/scseq>). 201 cells with < 50% ERCC spike-in sequences, > 50,000 read pairs, > 2500 genes (Cufflinks), > 5% spliced reads, < 50% duplication rate, <1.3 fold 3' bias and > 70% high-quality reads aligned were retained for further analysis. Fractions of single cells expressing genes were determined based on counts from featureCounts.

### **Geneset over-representation and motif enrichment analysis**

Geneset over-representation analyses were performed using one-sided Fisher's exact tests (FETs) (<https://github.com/sansomlab/gsfisher>). The tool MATT (Gohr and Irimia 2019) was used to determine motif enrichment in proximity to significant skipped exon events (*matt ma\_maps*, v1.3.0).

For geneset over-representation analysis of genes harbouring novel transcripts in mature mTEC (Fig. 3D) genes with upper-quartile normalized,  $\log_2(n+1)$ -transformed TPMs > 0.1 were used as the background geneset. For Fig. 3D, we filtered genesets (GO-BP) for a minimum of four genes overlapping with the geneset of interest, for an odds ratio > 1.5 and  $p\text{-adj} < 0.05$ . From 70 genesets left after filtering, the most relevant, non-redundant (based on overlap of genes between the genesets) genesets were selected manually. All geneset are supplied in Supplemental Table 4. For the analysis of differentially spliced events in the *Rbfox2* tKO dataset (Fig. 7B), the foreground geneset was comprised of genes with differentially spliced events ( $|\Delta(d)PSI| > 0.2$  and  $FDR < 0.05$ ) and the background geneset comprised of the set of genes that were tested for differential

splicing events (rMATS analysis). The comparison of genes containing differential splicing events between *Rbfox1* and *Rbfox2* tKO was performed using a two-sided FET.

As input for the motif enrichment tool MATT, exons with enhanced inclusion or exclusion ( $|\text{dPSI}| > 0.2$ ,  $\text{FDR} < 0.05$ ) in the *Rbfox2* tKO samples relative to their Cre- littermate controls were used.

Unregulated exons ( $|\text{dPSI}| < 0.05$ ) were used to compute a control enrichment profile.

### **Downstream data analysis and data visualisation**

Data analysis was performed in Python (jupyter notebooks; pandas v0.17.1) or R (RStudio; R v3.4). Heatmaps were leaf-optimised using the R cba library (v0.2-17). Genomic tracks were visualised using the R package Gviz (v1.22.3) or the *sashimi\_plot* function from MISO (Katz et al. 2010) (v0.5.3).

Testing of linear model fits to different sample groups was performed by ANCOVA analysis (Fig. 1C, Supplemental Fig. 4). First, we tested for a difference in slope by testing for a significant interaction between the group and independent variables. If there was not a significant difference ( $p > 0.05$ ), we concluded that there was no difference in slope and proceeded to test for a difference in intercept by fitting a second linear model without an interaction term. Model tests were performed using the R Anova function. Where a significant difference in intercept was observed ( $p < 0.05$ ) we used the adjusted mean values to summarise the locations of the groups.

## Supplemental Figures

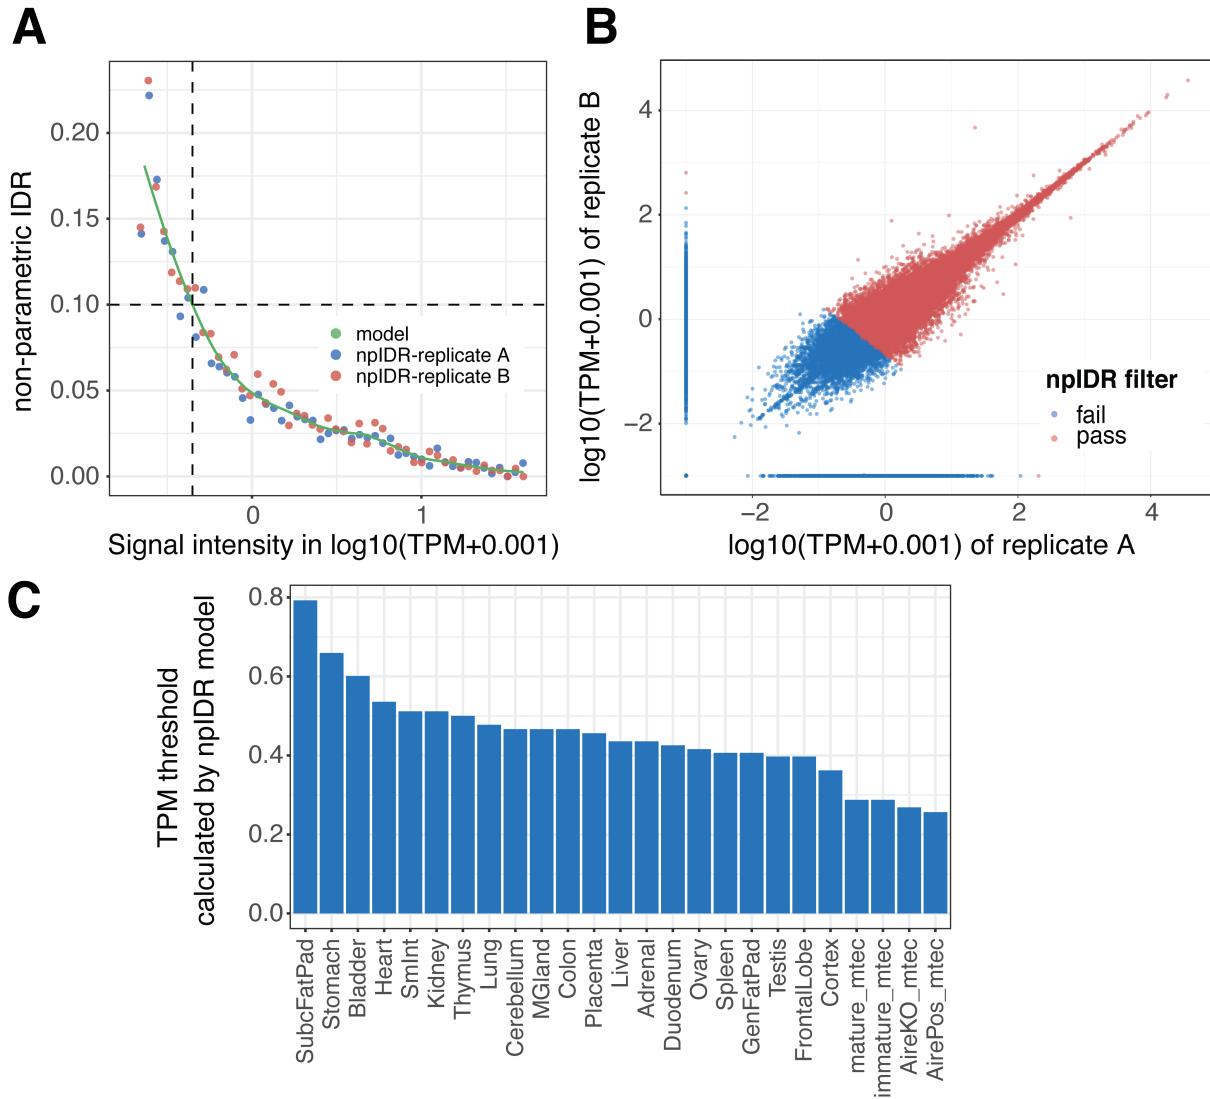

**Supplemental Figure 1: Development of a robust procedure for identification of reproducibly detected transcripts.** We noted that transcripts with very low expression values frequently passed a naïve npIDR filter. We therefore developed a more robust procedure in which the computed npIDR values are used to estimate a TPM threshold at which transcripts can be reliably detected (see Supplemental Methods). (A) Estimation of TPM thresholds for the selection of reproducibly detected transcripts. The scatter plot illustrates the relationship between the  $\log_{10}$  expression level (TPM) and npIDR using the data from the adrenal samples. For each peripheral tissue and TEC subpopulation this relationship was modelled by LOESS regression (green curve) and the fitted curves used to estimate TPM thresholds that corresponding to npIDR values of 0.1

(dashed lines). (B) Identification of reproducibly detected transcripts based on the defined TPM threshold. The scatter plot shows transcript expression levels for the two adrenal samples. The color indicates whether a transcript passes (red) or fails (blue) the npIDR filter as determined using the TPM threshold from panel B. (C) The TPM thresholds determined to correspond to  $\text{npIDR} \leq 0.1$  for each of the TEC and peripheral tissue samples.

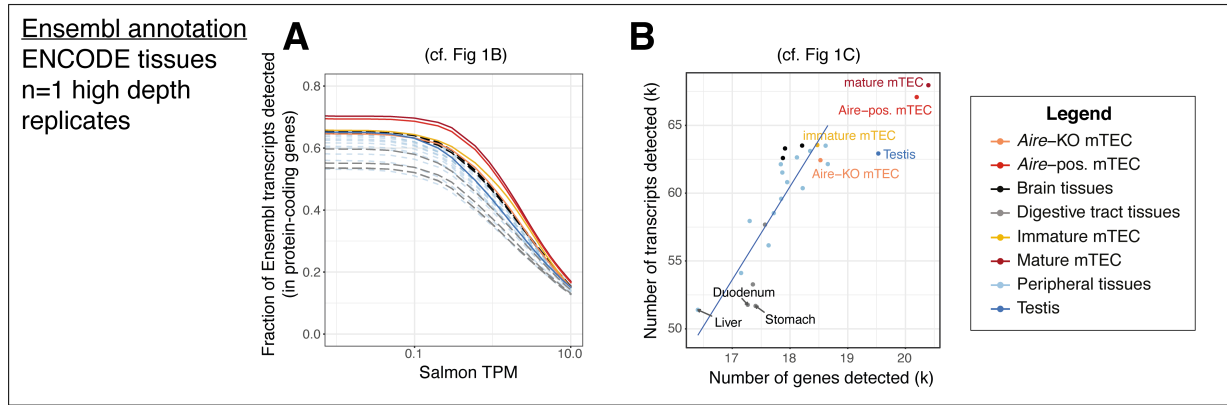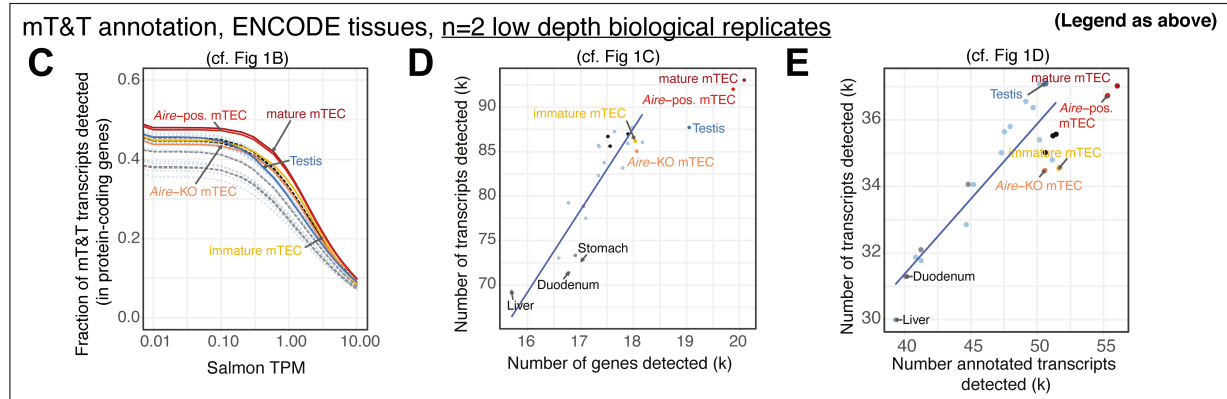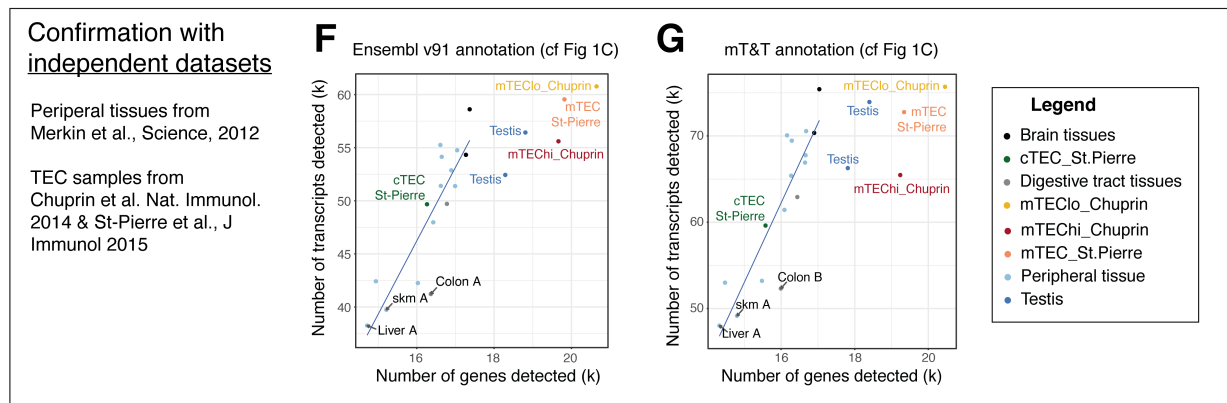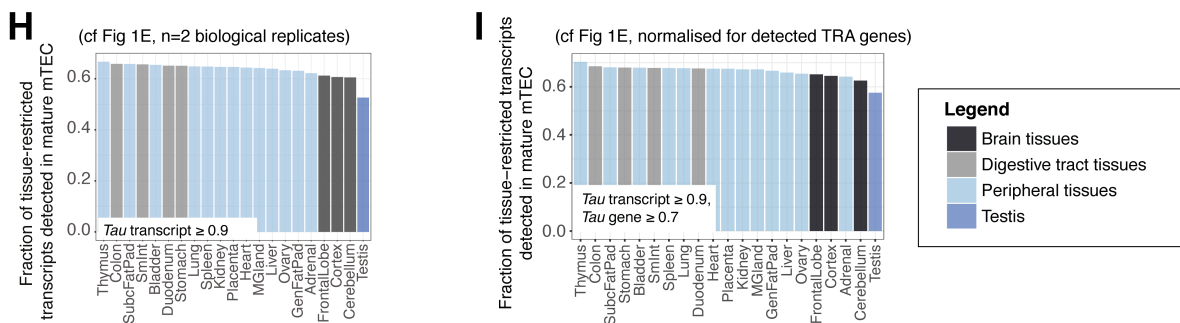

**Supplemental Figure 2: Confirmation of differences between TEC and peripheral tissue transcriptomes.** We confirmed the observed differences between TEC and peripheral transcriptomes (see Fig. 1) using (i) reference Ensembl (v91) annotations (A, B), (ii) mean statistics from lower depth biologically replicate samples pools (C-E) (n=2, 19.5M de-duplicated

mapped reads/sample, Supplemental Table 1) and (iii) with independent sets of peripheral tissue samples and TEC samples (F-G). For confirmation with independent datasets, we used mouse peripheral tissue RNA-seq data from Merkin et al. (Merkin et al. 2012) together with the mTEC population RNA-seq samples from Chuprin et al. (Chuprin et al. 2015) and St. Pierre et al (7 day old, (St-Pierre et al. 2013)). Trend lines in B, D-G were fitted to all samples except TEC and testis. We also confirmed the patterns of tissue-restricted transcript ( $\tau \geq 0.9$ ) representation in TEC (Fig. 1E) using (i) the lower depth biologically replicate sample pools (H) and (ii) after first normalising the fractions for the number of detected TRA genes ( $\tau_{gene} \geq 0.7$ ) (I).

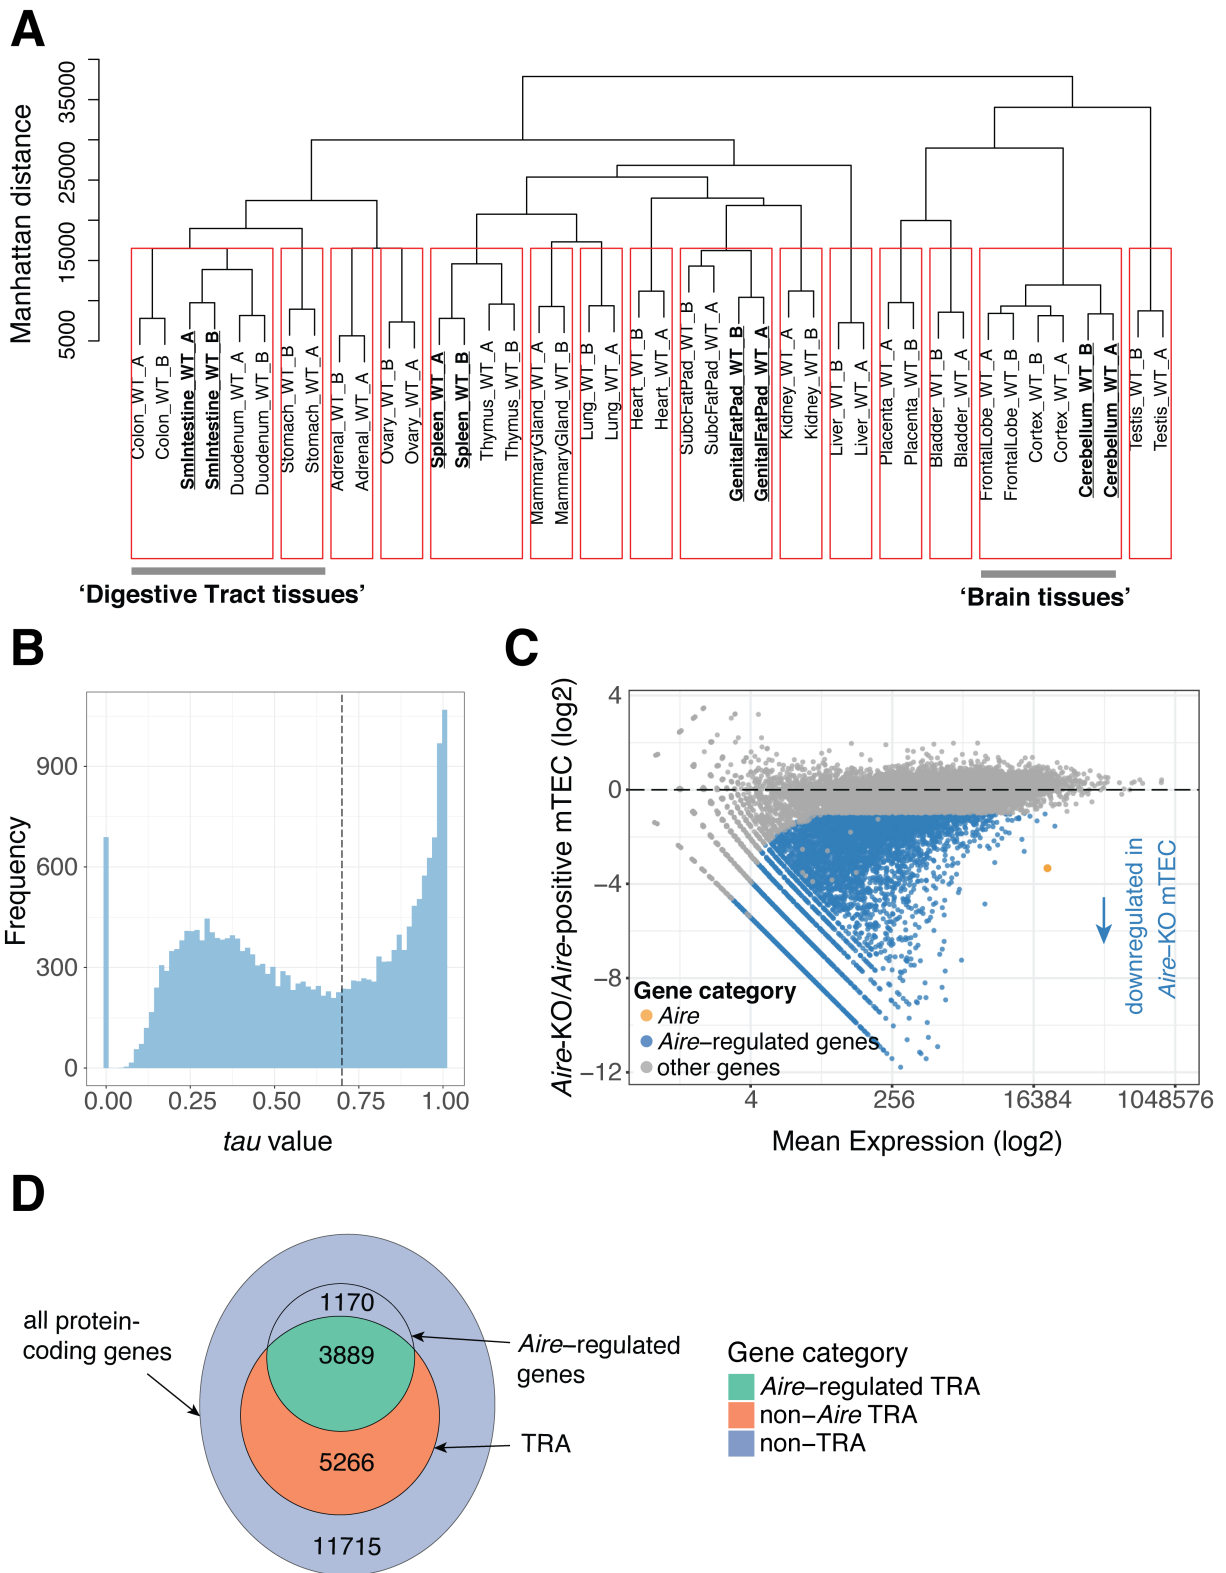

**Supplemental Figure 3: Definition of tissue groups and identification of promiscuously**

**expressed (tissue-restricted) genes.** (A) Definition of groups of similar peripheral tissues. The mouse ENCODE tissue samples were hierarchically clustered by expression of known transcripts from protein-coding genes that showed variable expression (top n=24,664 most highly variable

known transcripts, Manhattan distance, complete linkage, n=2 replicate pools per tissue). Tissue groups (n=15; red boxes) were defined by cutting the dendrogram at a fixed height. The tissues taken as the representatives of the groups with multiple tissues are shown in bold font and underlined. (B) The histogram shows the distribution of the *tau* (Kryuchkova-Mostacci and Robinson-Rechavi 2017) values for all protein-coding genes. The *tau* values were computed using the selected tissues (A) and the wildtype immature and mature mTEC samples. Genes with a *tau* value of > 0.7 (as indicated by the dashed vertical line) were identified as tissue-restricted antigens (TRA). (C) Identification of *Aire*-regulated genes by differential expression analysis of protein-coding genes between *Aire*-knockout and *Aire*-positive mature mTEC (n=2 biological replicates). Genes with a significant, >2-fold downregulation in the *Aire*-knockout were defined as *Aire*-regulated genes (BH-adjusted p < 0.05). Reads were quantitated with featureCounts (Liao et al. 2014) (Ensembl v91 annotations) and differential expression analysis performed using DESeq2 (Love et al. 2014). (D) Comparison of tissue-restricted genes (*tau* > 0.7) and *Aire*-regulated genes. The diagram shows the three categories of *Aire*-regulated TRA (*Aire*-TRA), non-*Aire*-regulated TRA (non-*Aire* TRA) and non-TRA which are used throughout the manuscript.



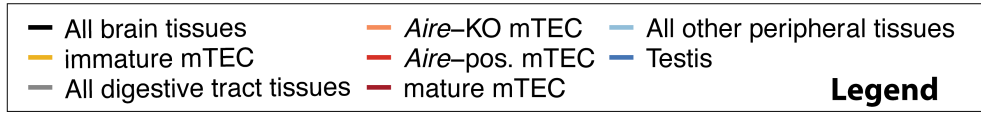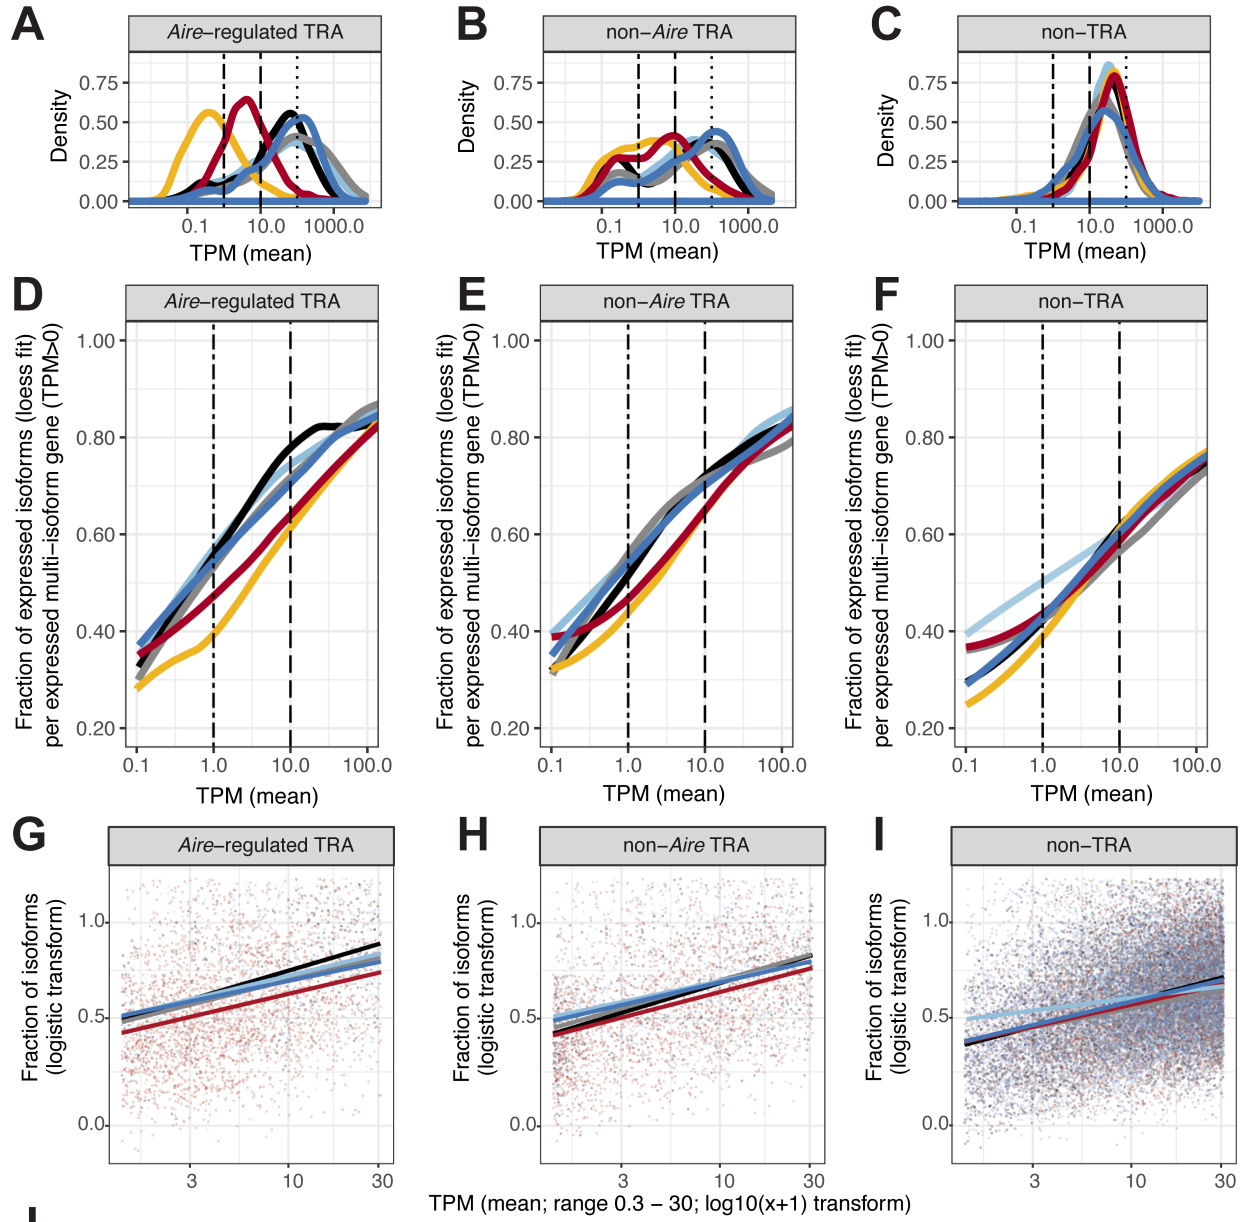

**J**

| gene type                  | tissue A                | tissue B    | slope p value              | intercept p value          | fraction isoforms tissue A | fraction isoforms tissue B | difference in fractions | difference in fractions (%) |
|----------------------------|-------------------------|-------------|----------------------------|----------------------------|----------------------------|----------------------------|-------------------------|-----------------------------|
| non-TRA                    | Brain regions           | mature mTEC | 0.00207 **                 | NA                         | NA                         | NA                         | NA                      | NA                          |
| non-TRA                    | Digestive tract tissues | mature mTEC | 0.0128 *                   | NA                         | NA                         | NA                         | NA                      | NA                          |
| non-TRA                    | periphery               | mature mTEC | $2.44 \times 10^{-12}$ *** | NA                         | NA                         | NA                         | NA                      | NA                          |
| non-TRA                    | Testis                  | mature mTEC | 0.218                      | $2.57 \times 10^{-05}$ *** | 0.61                       | 0.592                      | 0.018                   | 2.95%                       |
| <i>Aire</i> -regulated TRA | Brain regions           | mature mTEC | 0.109                      | $7.7 \times 10^{-13}$ ***  | 0.7                        | 0.591                      | 0.109                   | 15.6%                       |
| <i>Aire</i> -regulated TRA | Digestive tract tissues | mature mTEC | 0.77                       | 0.00334 **                 | 0.654                      | 0.588                      | 0.0664                  | 10.1%                       |
| <i>Aire</i> -regulated TRA | periphery               | mature mTEC | 0.812                      | $2.7 \times 10^{-16}$ ***  | 0.682                      | 0.592                      | 0.0903                  | 13.2%                       |
| <i>Aire</i> -regulated TRA | Testis                  | mature mTEC | 0.523                      | $6.75 \times 10^{-06}$ *** | 0.658                      | 0.59                       | 0.068                   | 10.3%                       |
| non- <i>Aire</i> TRA       | Brain regions           | mature mTEC | 0.133                      | 0.00479 **                 | 0.65                       | 0.609                      | 0.0417                  | 6.41%                       |
| non- <i>Aire</i> TRA       | Digestive tract tissues | mature mTEC | 0.632                      | 0.0203 *                   | 0.663                      | 0.607                      | 0.0562                  | 8.48%                       |
| non- <i>Aire</i> TRA       | periphery               | mature mTEC | 0.0602 .                   | $7.46 \times 10^{-11}$ *** | 0.671                      | 0.612                      | 0.0584                  | 8.71%                       |
| non- <i>Aire</i> TRA       | Testis                  | mature mTEC | 0.28                       | $7.28 \times 10^{-07}$ *** | 0.66                       | 0.609                      | 0.0509                  | 7.71%                       |

**Supplemental Figure 4: TEC express fewer isoforms of TRA genes.** (A-C) TEC express *Aire*-regulated TRA and non-*Aire* TRA genes at lower levels than is found in periphery. The density plots show the TPM distributions of these genes for the testis, sets of peripheral tissues (for legibility mean TPM values are shown for all brain tissues, all digestive tract tissues and all other peripheral tissues) and the immature and mature mTEC cell populations. The three dashed vertical lines correspond to TPM values of 1, 10 and 100. (D-F) Detection of a lower-fraction of isoforms from (multi-isoform) *Aire*-regulated and non-*Aire* TRA genes in TEC is independent of gene expression level. The relationship between gene expression level (x axis) and isoform detection (y axis) for the testis, sets of peripheral tissues (sets of tissues defined as for A-C; mean isoform fractions) and immature and mature mTEC (LOESS regression curves). (G-J) To formally test for expression-level independent differences in the fraction of TRA isoforms expressed between mature TEC and the peripheral tissue groups we fitted linear models to the commonly linear portions of the relationships ( $0.3 < \text{TPM} < 30$ ) after first performing a logistic transform of the fractions and a  $\log_{10}(x+1)$  transform of the expression levels (G-I). We tested for difference in the slope and intercept using an ANCOVA-based approach (Supplemental Methods). If a significant difference in slope (i.e. a significant interaction) was found, a difference in intercept was not tested for. The results are summarized in (J) with adjusted mean fractions and adjusted mean fraction differences shown where significant differences in the intercepts were observed. Analyses for all panels were performed using the high-depth samples ( $n=1$ ). For the analyses of TRA in peripheral tissues gene statistics were only counted for the relevant iTRA subsets while the full set of TRA genes was quantitated in each of the TEC populations.

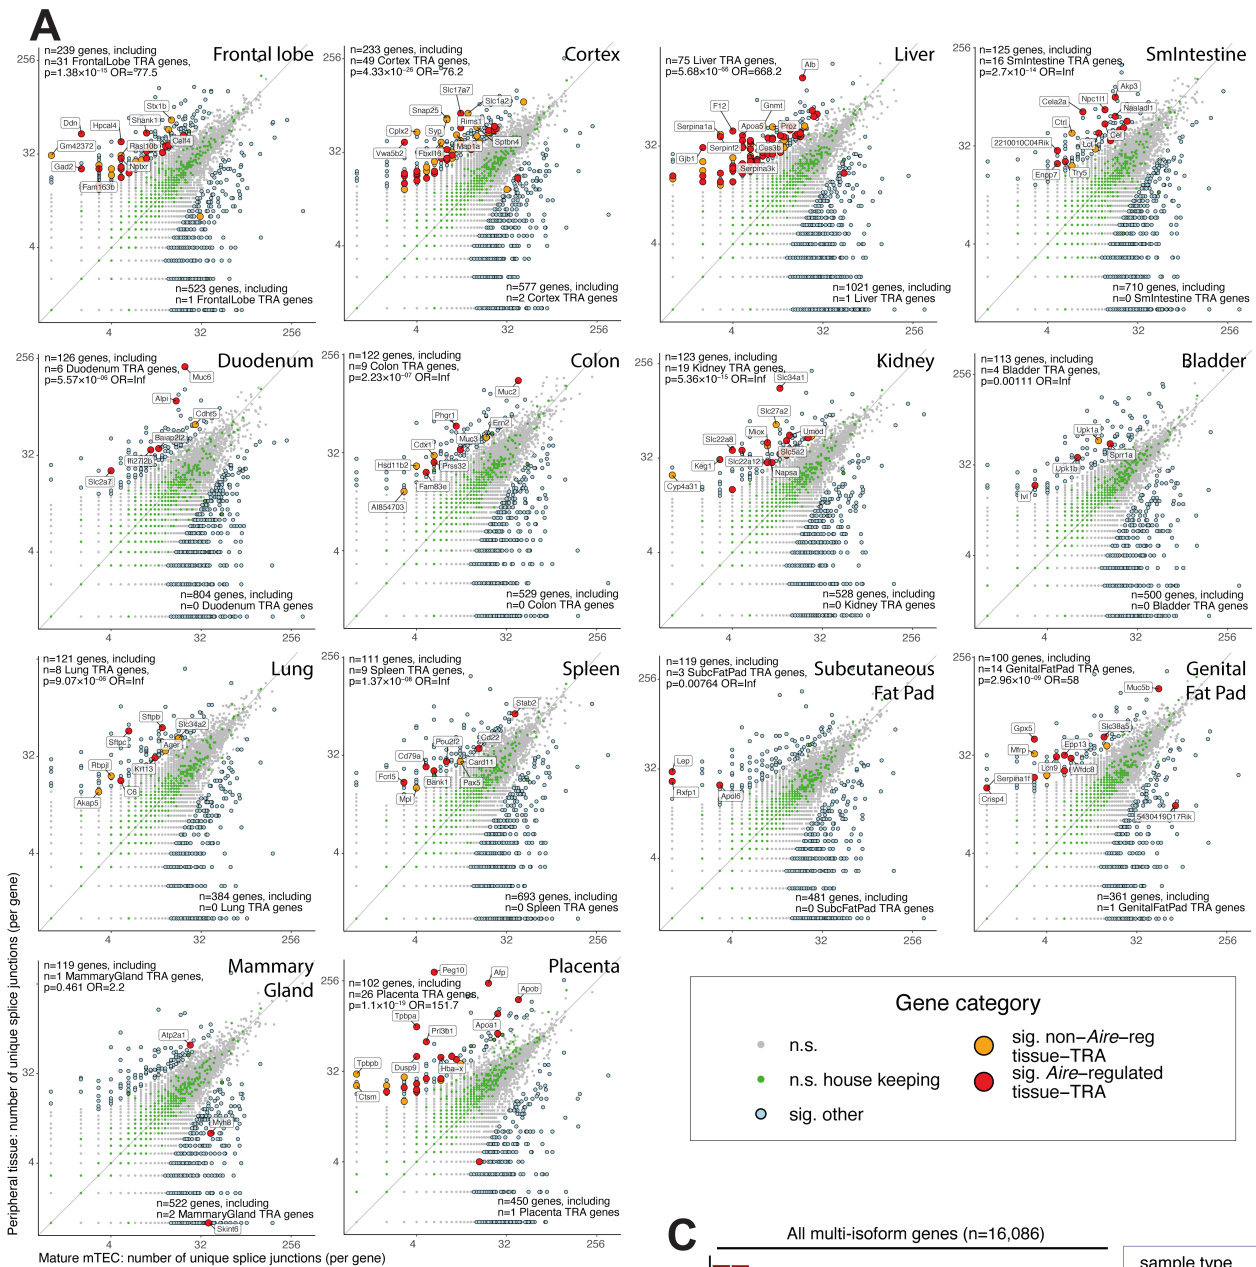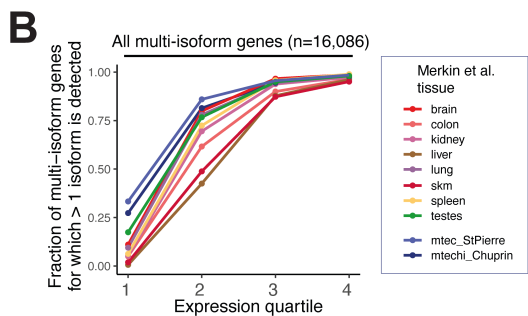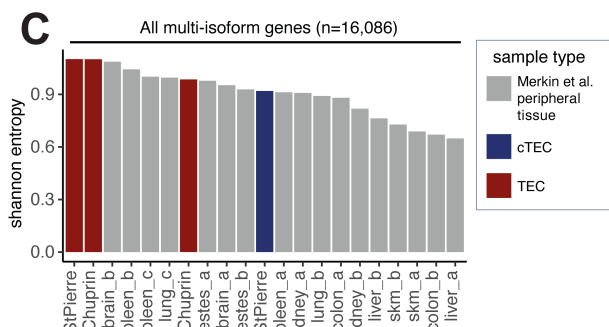

**Supplemental Figure 5: Analysis of TRA splicing in individual tissues. (A) Continued from Fig. 2B: the remaining  $n=14$  ENCODE tissues not shown in the main figure are shown here. The numbers of splice junctions found in protein-coding genes (points) in mature mTEC (this study; x axes) vs peripheral tissues (ENCODE; y axes). Significant (sig.) differences in junction number**

were identified using edgeR (BH adjusted  $p < 0.05$ ,  $|fc| > 2$ ). P-values and odds ratios (OR) from Fisher's exact tests for enrichment of per-tissue iTRA gene subsets among the genes with significantly higher junction counts in the peripheral tissues are reported (at top left). The top 10 tissue iTRA genes with significant differences in junction counts are labelled (as ranked by edgeR p-value). (B, C) Comparison of splicing complexity in TEC and peripheral tissues using data from Merkin et al. (Merkin et al. 2012) and TEC data from St-Pierre et al. (St-Pierre et al. 2013) and Chuprin et al. (Chuprin et al. 2015) *These panels correspond to those shown for sets of per-tissue iTRA genes in Fig. 2C and D.* Here, as was reported previously (Keane et al. 2015; Danan-Gotthold et al. 2016), we confirm that when all multi-isoform genes are considered without regard for tissue specificity, (B) more alternatively spliced genes can be found in mTEC than are present in peripheral tissues (Danan-Gotthold et al. 2016), and (C) a higher mean Shannon entropy of per-gene isoform expression is observed in mTEC than in peripheral samples (Keane et al. 2015).

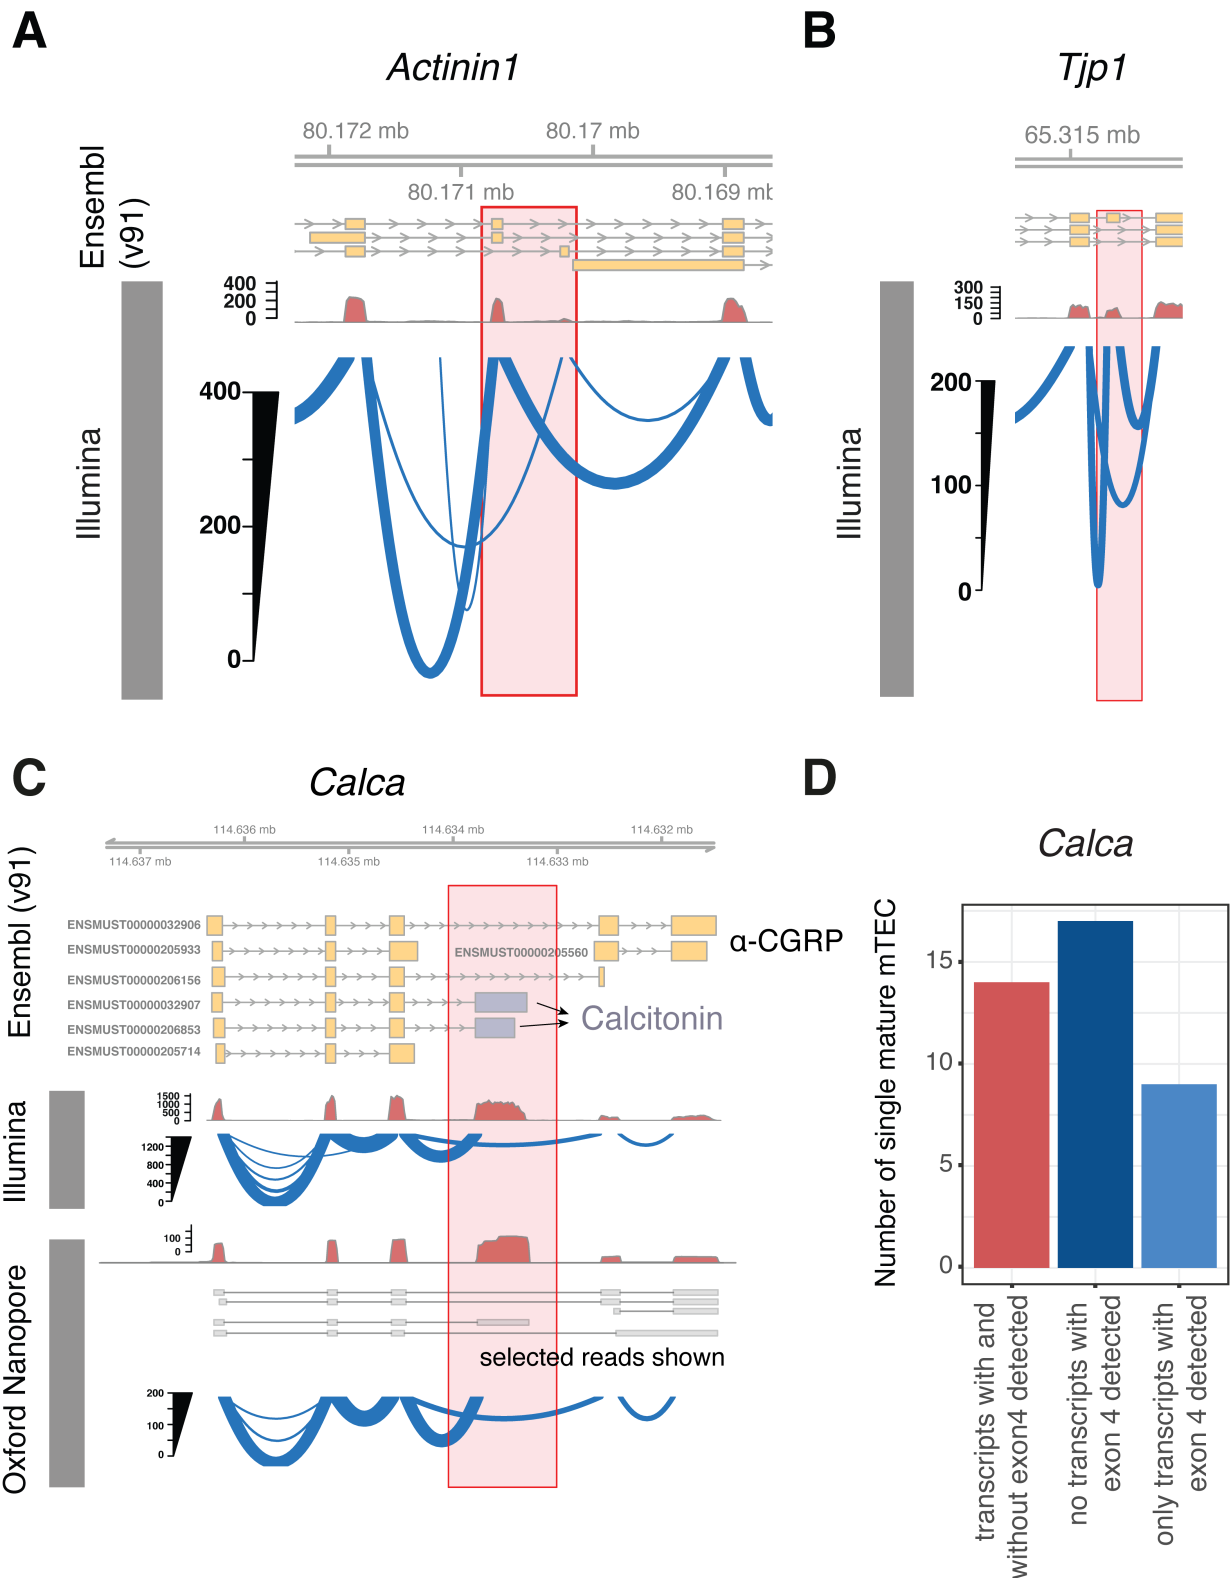

**Supplemental Figure 6: Examples of known tissue-specific alternative splicing events**

**recapitulated in TEC.** (A) Transcript models, read coverage and sashimi plots for the gene

*Actinin1*. Mature mTEC express both the muscular and non-muscular isoforms of *Actinin1* which are differentiated by expression of the indicated mutually exclusive exon pair (red box) (Gromak et al. 2003).

(B) Transcript models, read coverage and sashimi plots for the gene *Tjp1*. Mature mTEC

express isoforms with and without exon 20 (red box). In the periphery inclusion of exon 20 is known to be highly tissue specific (Merkin et al. 2012). (C) Transcript models, read coverage and sashimi plots for the gene *Calca*. The shorter isoform, in which inclusion of exon 4 (red box) introduces a premature stop codon, is specific to the thyroid and produces the Calcitonin (CT) peptide (Chew 1997; Chen and Manley 2009). In the nervous system, exon 4 (red box) is skipped to form the longer  $\alpha$ -CGRP isoform. Mature mTEC express both of these isoforms. For the Illumina sequencing, the sashimi plots in A-C were generated from the single high-depth sample of mature mTEC. Only splice junctions with coverage of  $\geq 5$  reads are shown. (D) Detection of exon 4 inclusion and exclusion in *Calca* transcripts in single mature mTEC. 35 % of the cells where *Calca* is detected produced *Calca* transcripts both with and without this exon.

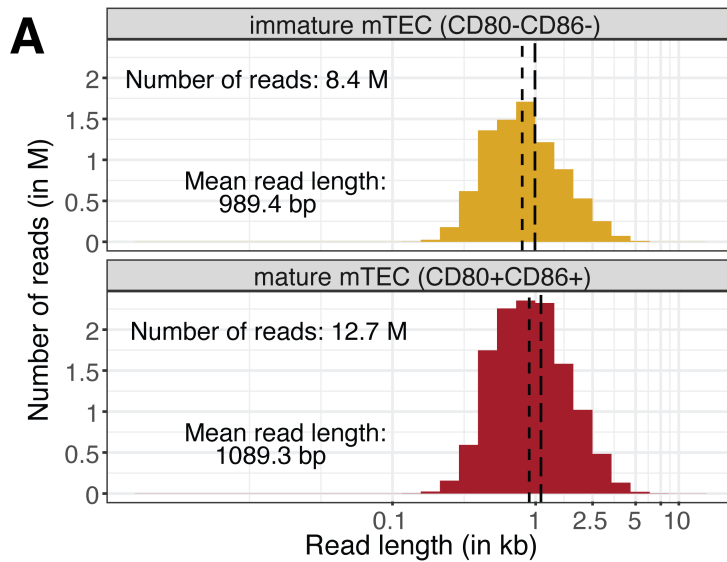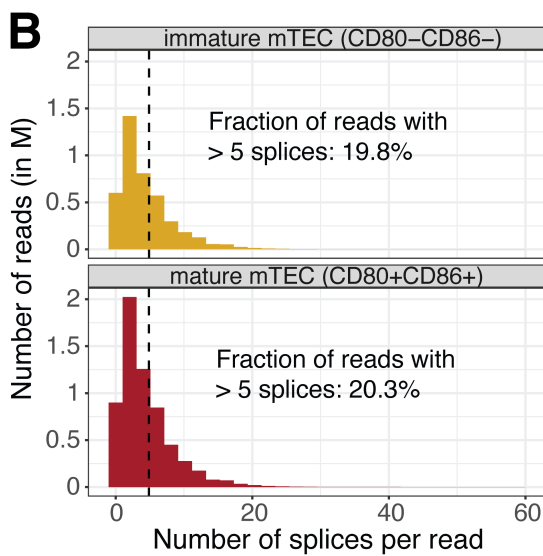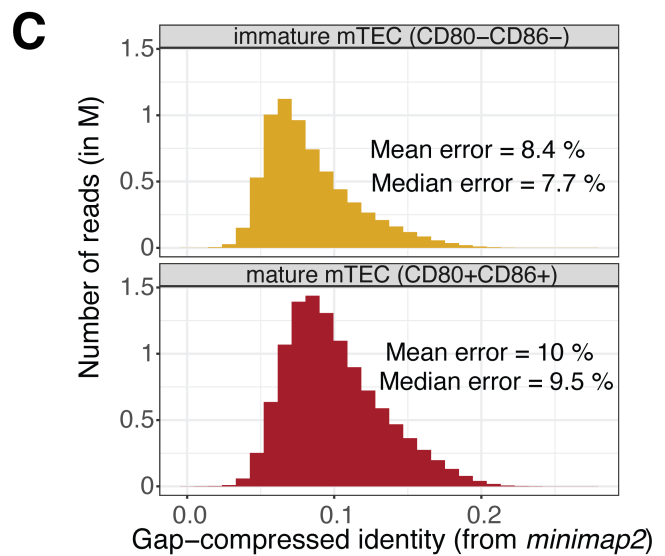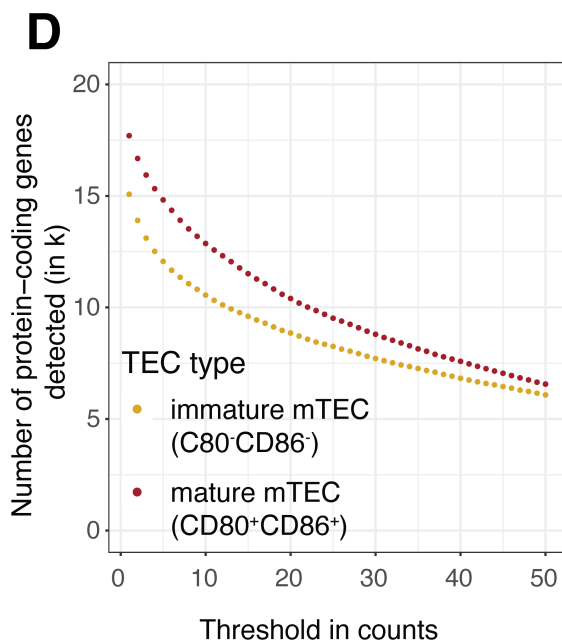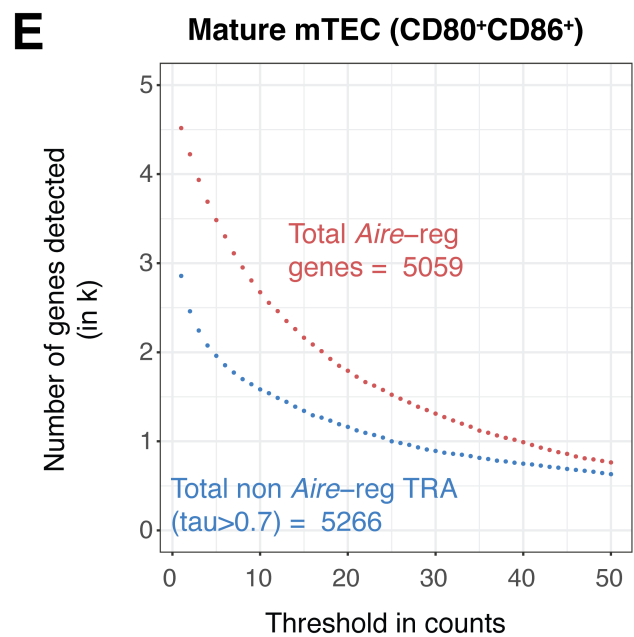

### Supplemental Figure 7: Long-read sequencing of mTEC using Oxford Nanopore

**Technology.** (A) Histograms of read length for Oxford Nanopore Technology (ONT) experiments. Immature and mature mTEC samples shown represent merged reads from three biological replicates. (B) Histograms of number of splices detected per read for the samples of merged ONT reads from immature and mature mTEC. (C) The mapping error for the merged ONT reads is estimated as 10 % or less. The Gap-compressed divergence is used as a measure of error (0 representing no errors in alignment, calculated using Minimap2). (D) The numbers of protein-coding genes detected in merged ONT read samples from mature and immature mTEC. Reads were down-sampled to a common number for the two mTEC populations. (E) A large number of *Aire*-regulated genes was detected in the ONT data from mature mTEC. The number of detected *Aire*-regulated and tissue-specific genes ( $\tau > 0.7$ ) is assessed across a range of count thresholds using the merged ONT reads from mature mTEC.



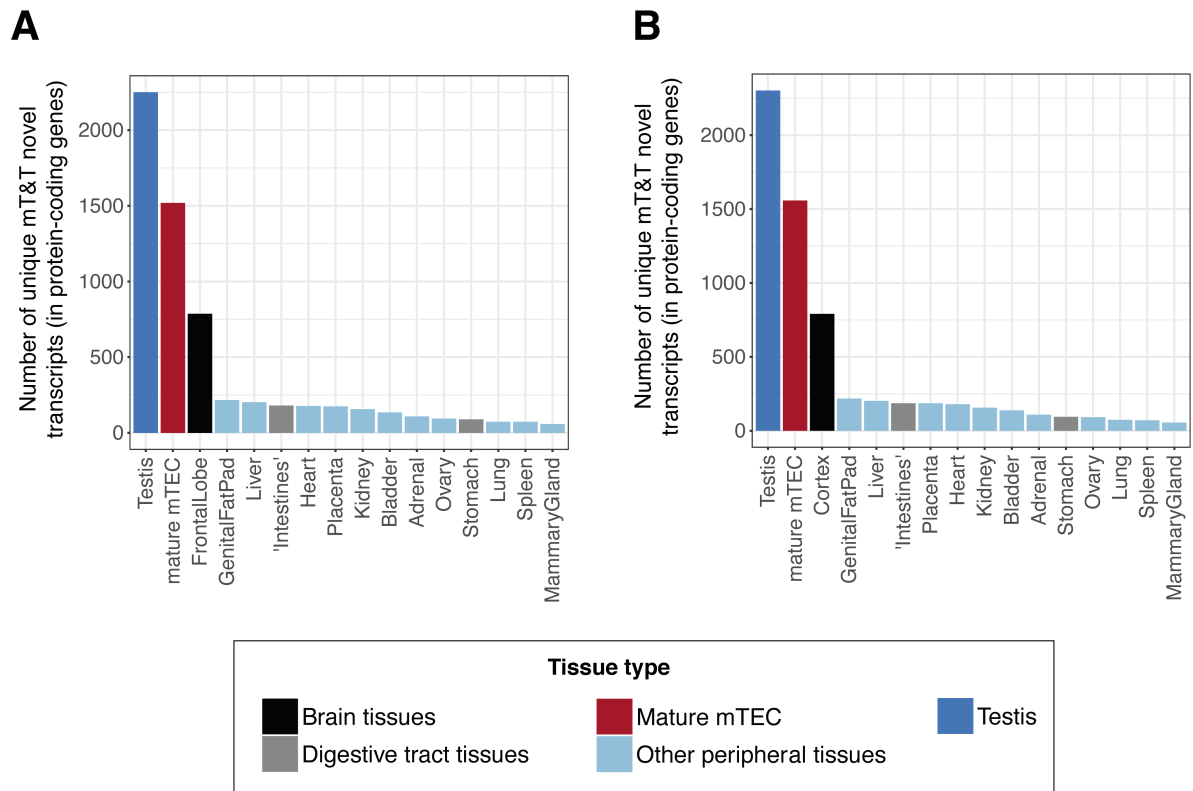

**C** Overlap in the “unique” novel transcripts identified for the different brain tissues (from Fig. 3B and this figure A, B).

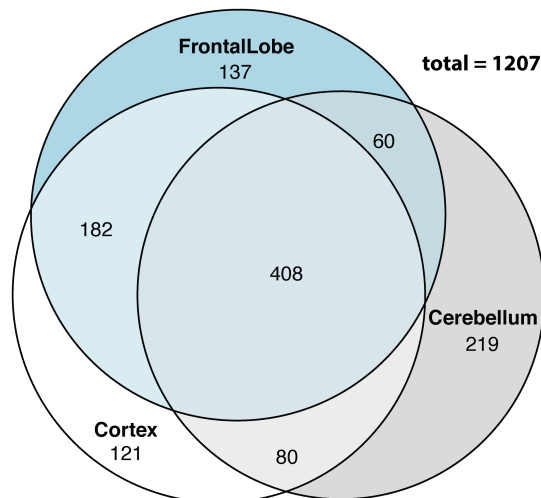

**Supplemental Figure 8: Confirmation that similar numbers of unique novel transcripts are found in the different brain tissues.** Analysis for Fig. 3B repeated with (A) the Frontal Lobe and (B) the Cortex sample used as the representative tissue for the group of brain tissues (see Supplemental Fig. 3A). (C) Venn diagram showing the overlap between the unique novel transcripts identified by using either Frontal Lobe, Cortex or Cerebellum as the representative tissue for the group of brain tissues.

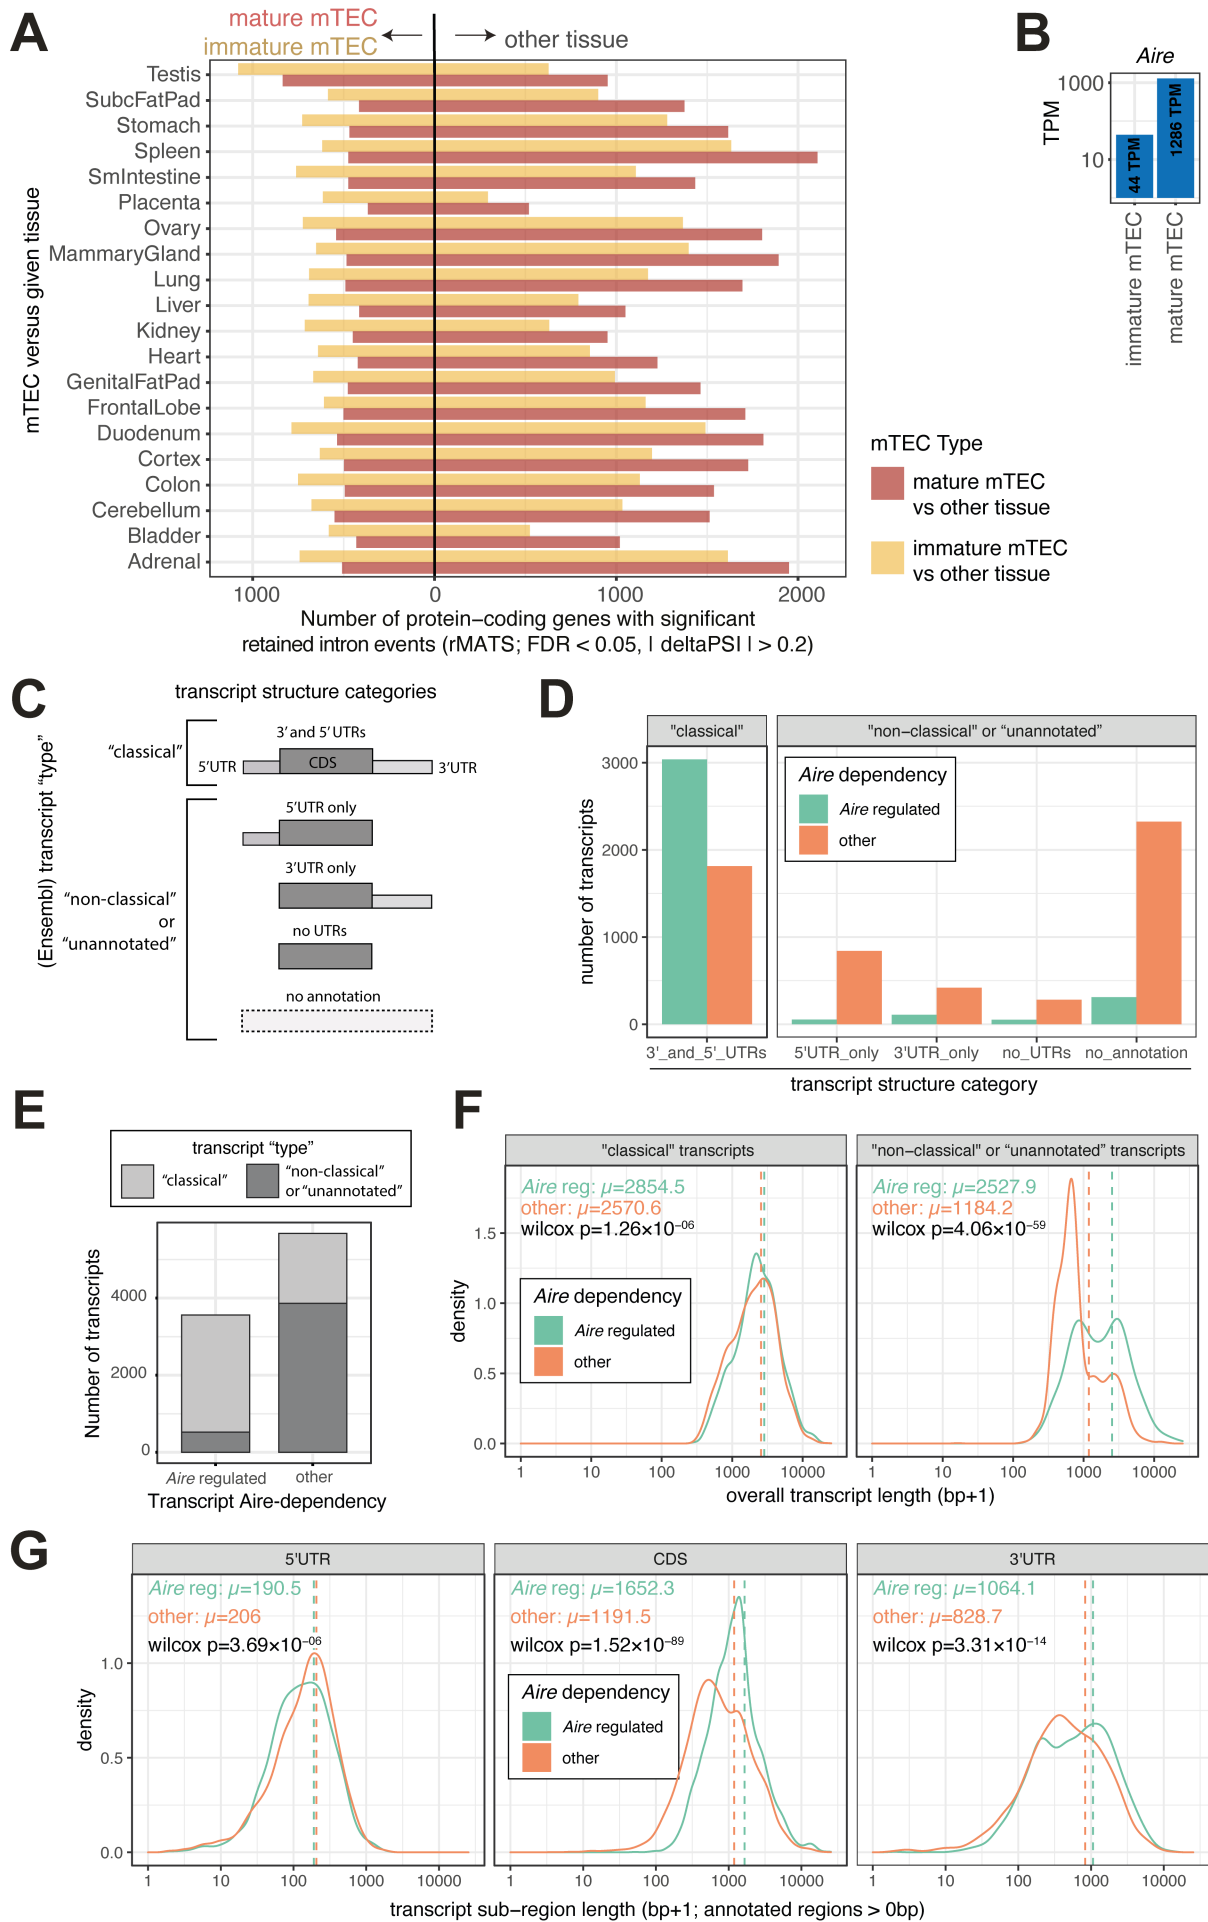

### Supplemental Figure 9: Additional retained intron and *Aire*-regulated transcript structure analyses

(A) The numbers of protein-coding genes (x axis) in which significant differential intron retention events were detected. The numbers are given for the comparisons of immature or mature mTEC versus each peripheral tissue (n=2 replicates per sample, subsampled to same depth). (B) The expression level of *Aire* in immature and mature mTEC. (C-G) Analysis of the transcript structures produced by *Aire*-regulated genes in mature mTEC. The analysis was performed using Ensembl v91 annotations. *Aire*-regulated transcripts were identified as shown in Fig 4C. (C) The cartoon shows the structures of the different types of transcripts that were detected. These were broadly divided into (i) “classical” transcripts for which all of the 5’ UTR, CDS and 3’UTR sub-regions had been annotated and (ii) “non-classical” or “unannotated” transcripts for which not all sub-regions were not present or had not been annotated. (D) The barplots show the numbers of the different types of transcript structures detected for the *Aire*-regulated and other transcripts. (E) The barplot shows that *Aire*-regulated transcripts were largely comprised of “classical” transcripts while the “other” (i.e. non-*Aire*-regulated) transcripts produced by *Aire*-regulated genes had “non-classical” or “unannotated” structures. (F) The density plots show the length distributions of “classical” vs “non-classical” or “unannotated” transcripts. Relative to their non-*Aire*-regulated counterparts the mean length of *Aire*-regulated transcripts was slightly increased for the “classical” transcripts (283.9bp; 11%) and greatly increased for the “non-classical” or “unannotated” transcripts (1343.7bp; 213%). (G) Comparison of the lengths of annotated 5’UTR, CDS and 3’UTR transcript regions from the *Aire*-regulated and non-*Aire*-regulated transcripts produced by *Aire*-regulated genes. Relative to their non-*Aire*-regulated counterparts the mean length of the 5’UTRs from *Aire*-regulated transcripts was decreased by 15.5bp (7.6%). Relative to their non-*Aire*-regulated counterparts the mean length of the CDSs from *Aire*-regulated transcripts was increased by 460.8bp (38.6%). Relative to their non-*Aire*-regulated counterparts the mean length of the 3’UTRs from *Aire*-regulated transcripts was increased by 235.4bp (28.4%).

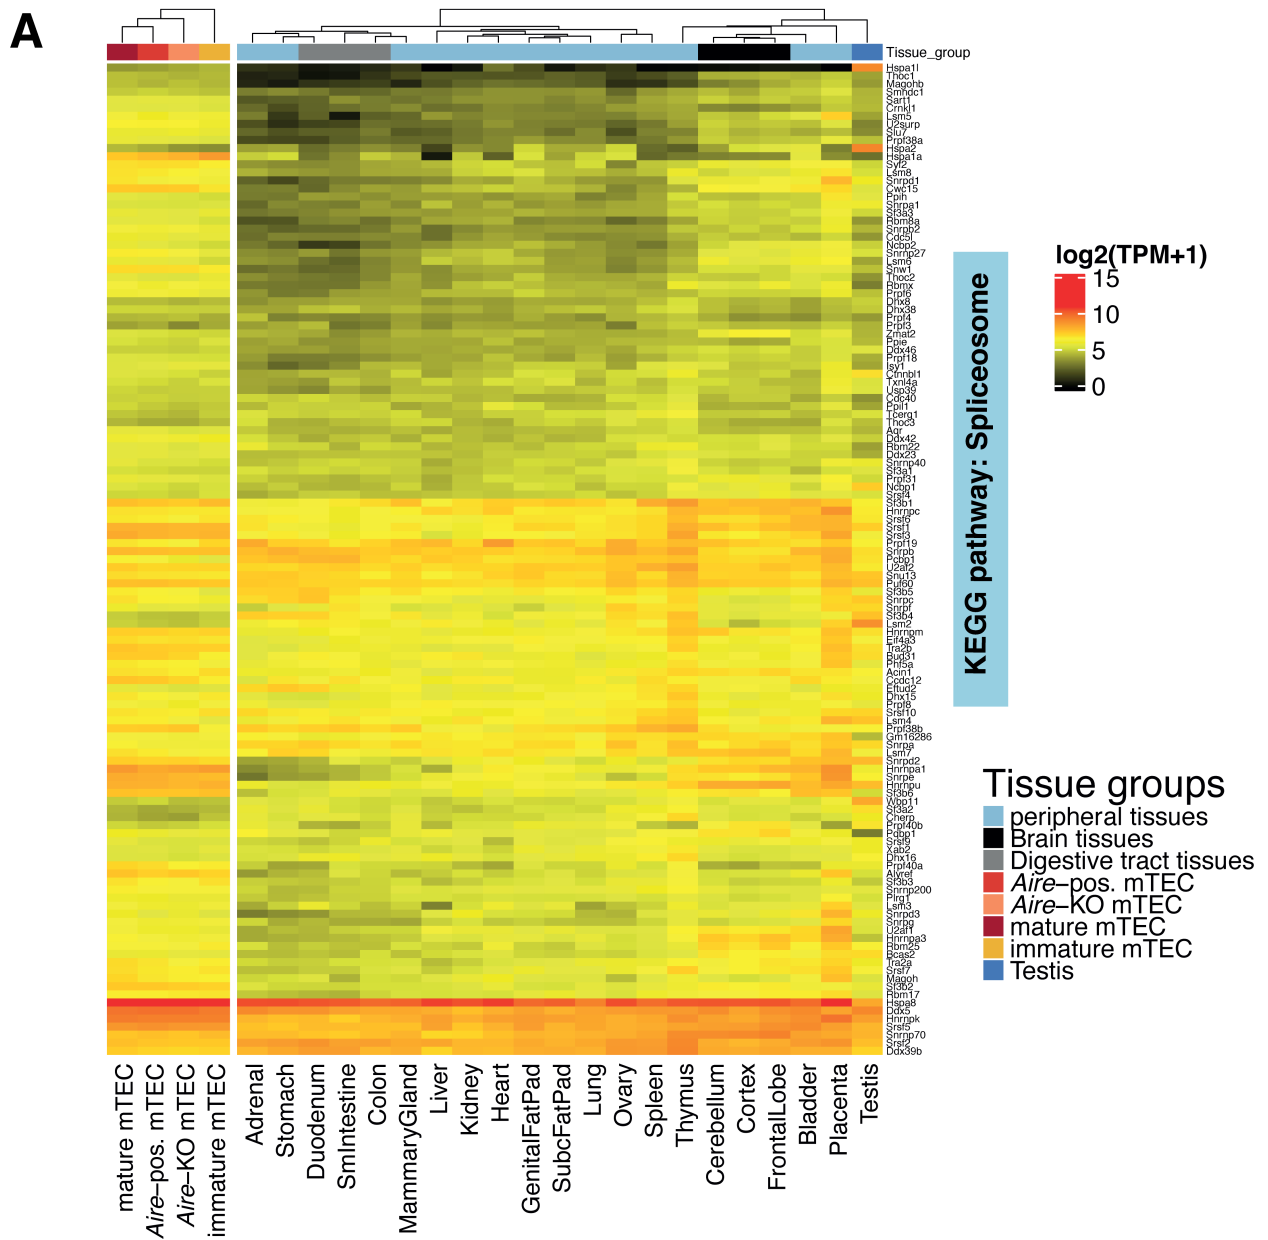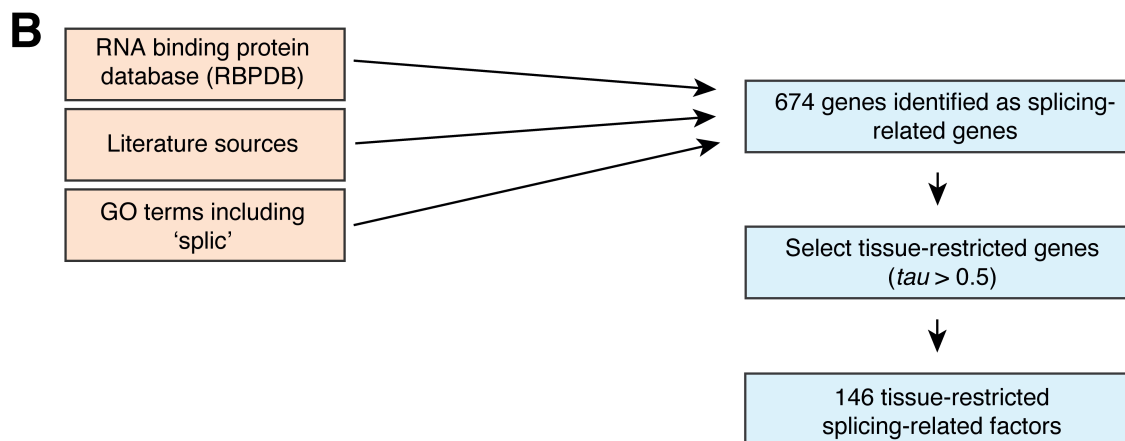

**Supplemental Figure 10: Expression of spliceosome genes and identification of a set of tissue-restricted splicing factors.** (A) Expression of all genes in the KEGG spliceosome pathway (ID: 03040) (taken to represent constitutive splicing factors). TEC populations did not show a

reduced expression of these genes compared to the peripheral tissues (mouse ENCODE Project).

(B) Compilation of a list of tissue-restricted splicing-related factor genes (see Supplemental Methods).

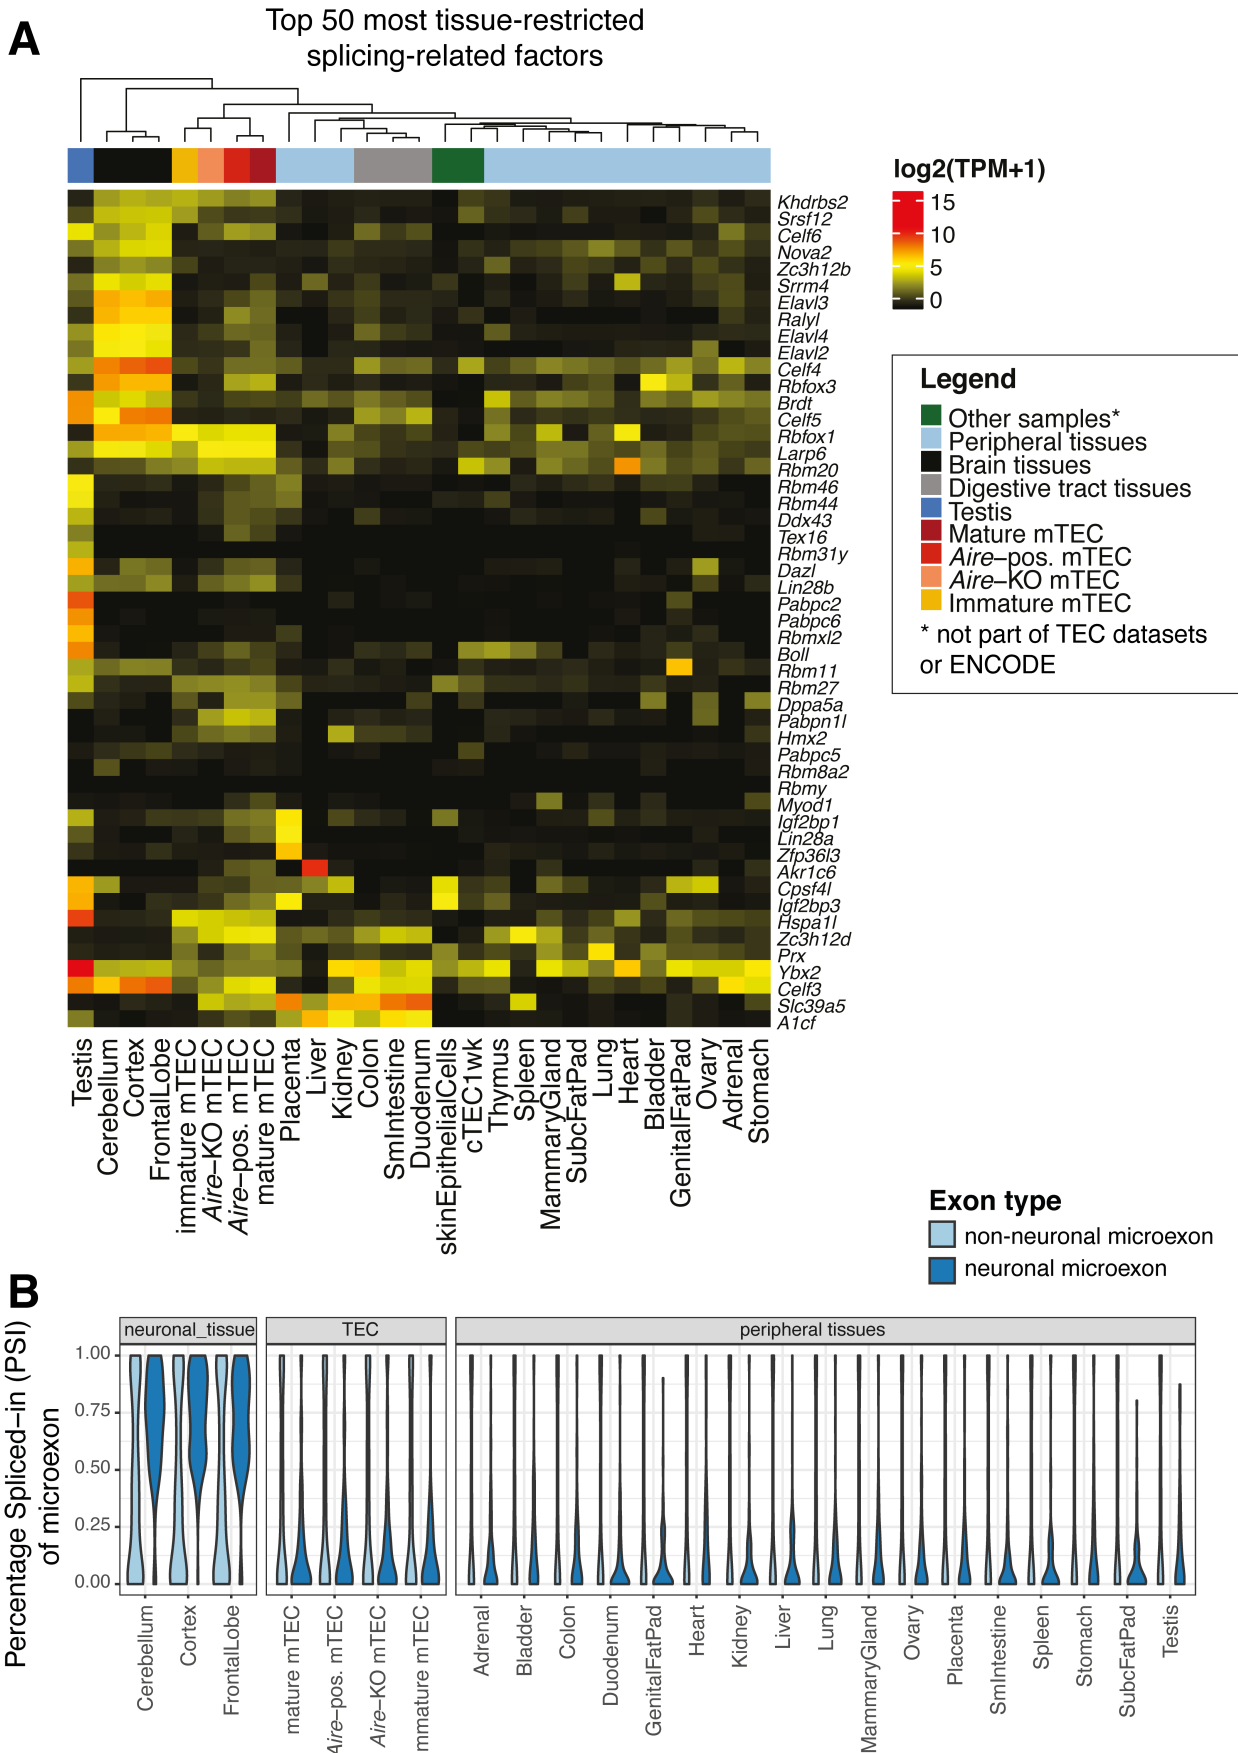

**Supplemental Figure 11: Tissue-restricted splicing factor expression and micro-exon**

**inclusion rates in TEC and peripheral tissues (A) Heatmap of expression level of the 50 tissue-**

restricted splicing-related factors with the highest *tau* values across the included peripheral tissues and TEC subpopulations. Predicted genes (those beginning with 'Gm' and RIKEN clones) were excluded. (B) Violin plots showing the distribution of Percentage spliced-in (PSI) values of sets of neuronal (dark blue) and non-neuronal (light blue) microexons in neuronal tissues, TEC and other peripheral tissues. Neuronal microexons (dark blue) were defined as those having a mean PSI in neuronal tissues  $> 0.5$  and a mean PSI in other tissues  $< 0.3$ .

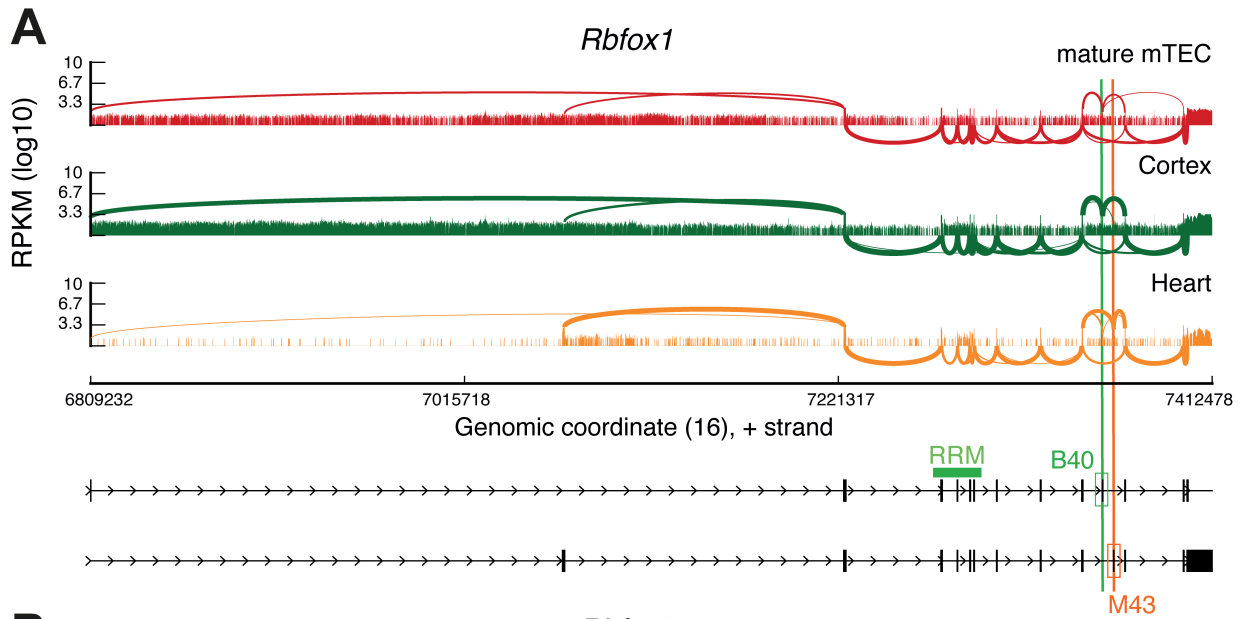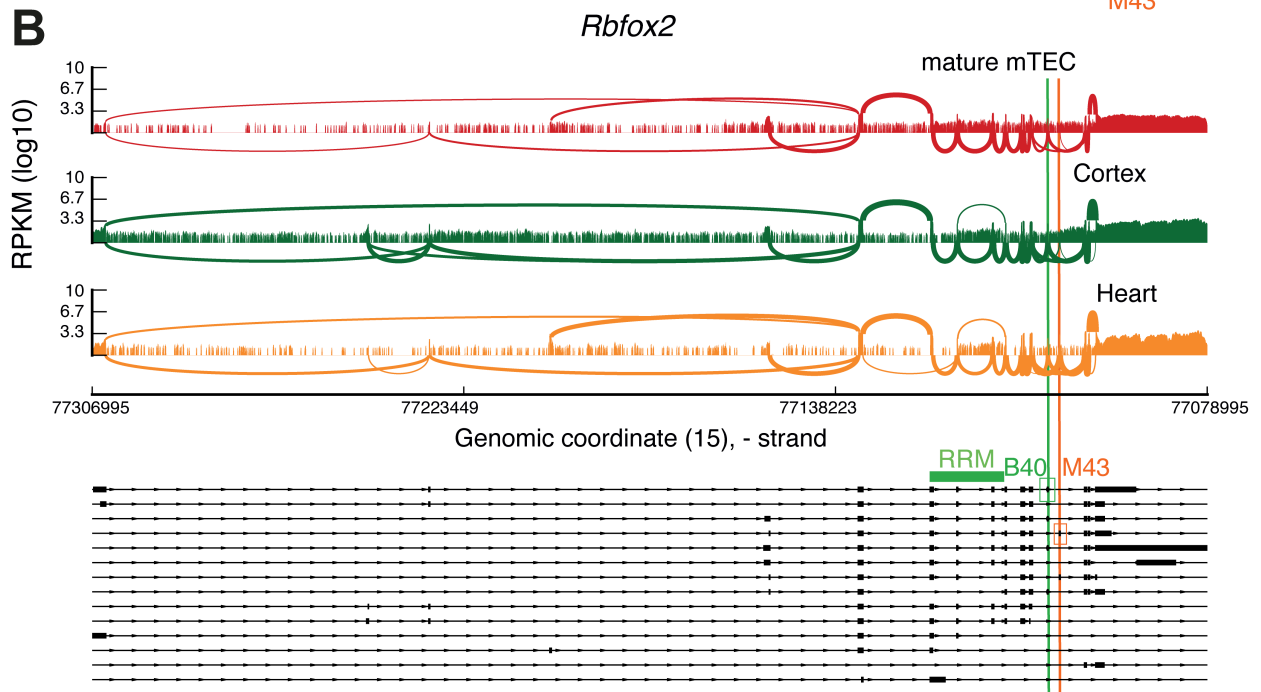

**C** Gene expression of *Rbfox* family members

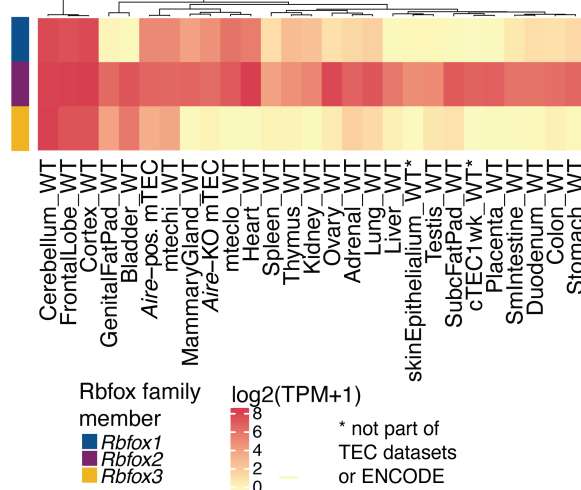

**D**

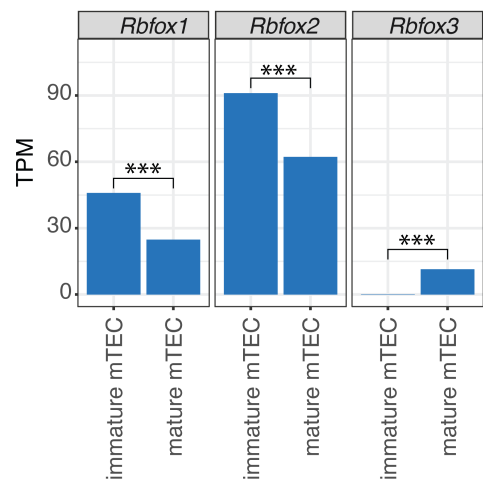



**Supplemental Figure 12: Splicing and expression of the Rbfox family in TEC and peripheral tissues.** Assessment of the transcript structures of *Rbfox1* (A) and *Rbfox2* (B) present in the samples from mature mTEC, cortex and heart. Panels show sashimi plots (and read coverage) above the annotated transcript models. The positions of the brain (B40) and muscle (M43) specific exons are indicated. The plots in C and D were generated using MISO (Katz et al. 2010) from a single high-depth, deduplicated sample per tissue. (C) Heatmap of the expression of members of the Rbfox family across mouse peripheral tissue and TEC sub-populations. Columns are hierarchically clustered. (D) The barplots show the expression of *Rbfox1*, *Rbfox2* and *Rbfox3* in wildtype immature and mature mTEC. Stars indicate significant differential expression (DESeq2 comparison of immature versus mature mTEC with high depth, n=2 replicates).

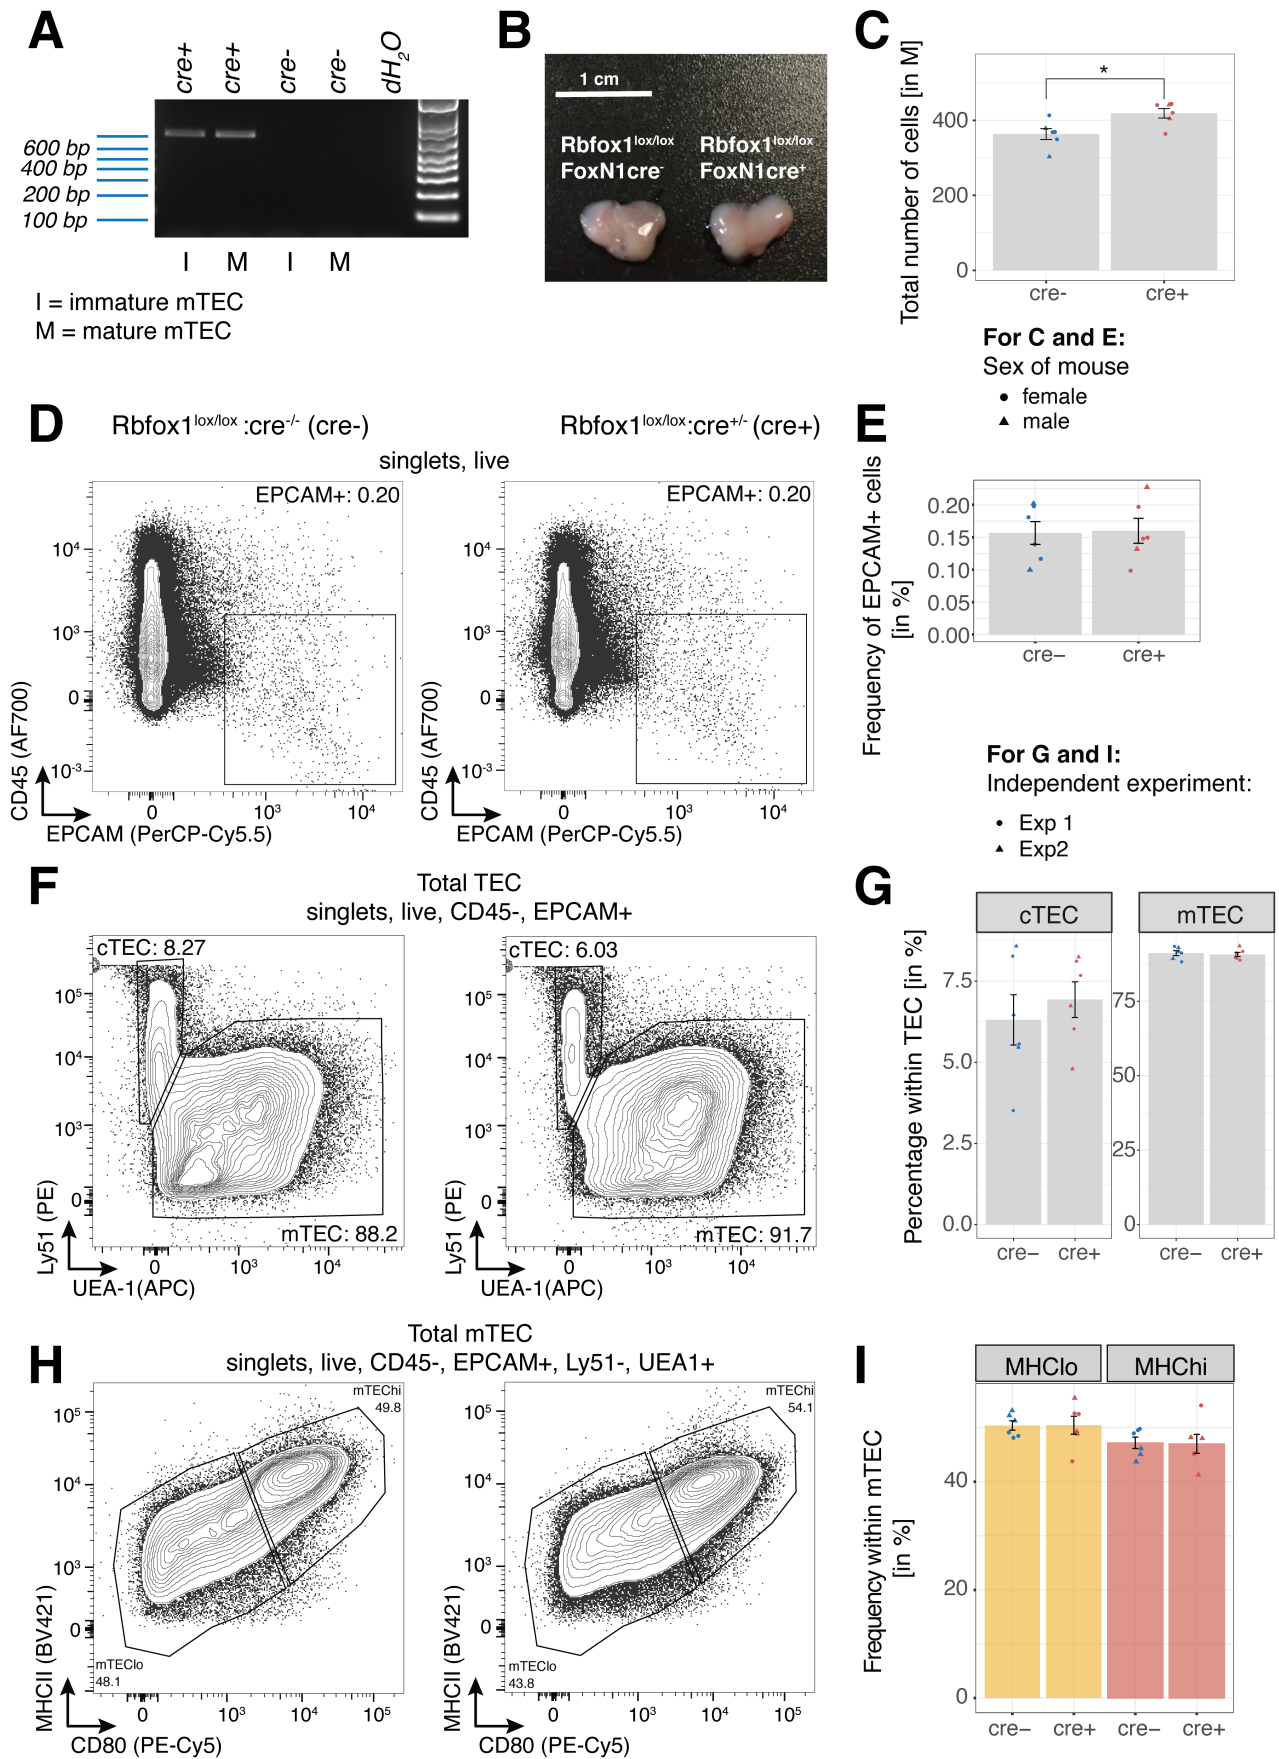

**Supplemental Figure 13: Assessment of the phenotype of *Rbfox1* deficient thymi and thymic epithelial cells. *Rbfox1*<sup>lox/lox</sup>; cre<sup>-/-</sup> (designated cre- and serving as controls) and**

*Rbfox1*<sup>lox/lox</sup>:cre+/- (designated cre+) mice were compared. (A) PCR analysis of genomic exons 11 and 12 of *Rbfox1*. (B) Representative image of gross anatomy of the thymus isolated from *Rbfox1* tKO and control mice. (C) Total thymus cellularity. The individual symbols indicate the sex of each mouse. (D) Gating strategy for the identification of TEC. Representative graphs demonstrate the gating for TEC (EPCAM+, CD45-) among non-enriched thymic cells isolated from the indicated mouse strains. (E) TEC frequencies. (F) Gating strategy for the identification of TEC subpopulations. Representative graphs demonstrate the gating for TEC subpopulations from enriched cells (EPCAM+, CD45-). (G) Frequencies of TEC subpopulations. (H) Gating strategy to identify mTEC subpopulations as defined by MHCII and CD80 expression. (I) Frequencies of mTEC subpopulations. In panels G and I, the two independent experiments are indicated by different symbols in the bar graphs. Data presented in bar graphs represents the combined results from n=2 independent experiments with n=6 mice in each experiment (4-6 weeks old). Significant differences of p-value < 0.05 between *Rbfox1*<sup>lox/lox</sup>:cre-/- and *Rbfox1*<sup>lox/lox</sup>:cre+/- using a two-sided Welch Two Sample *t*-test are indicated with \* (mean ± SE shown in bar graphs).

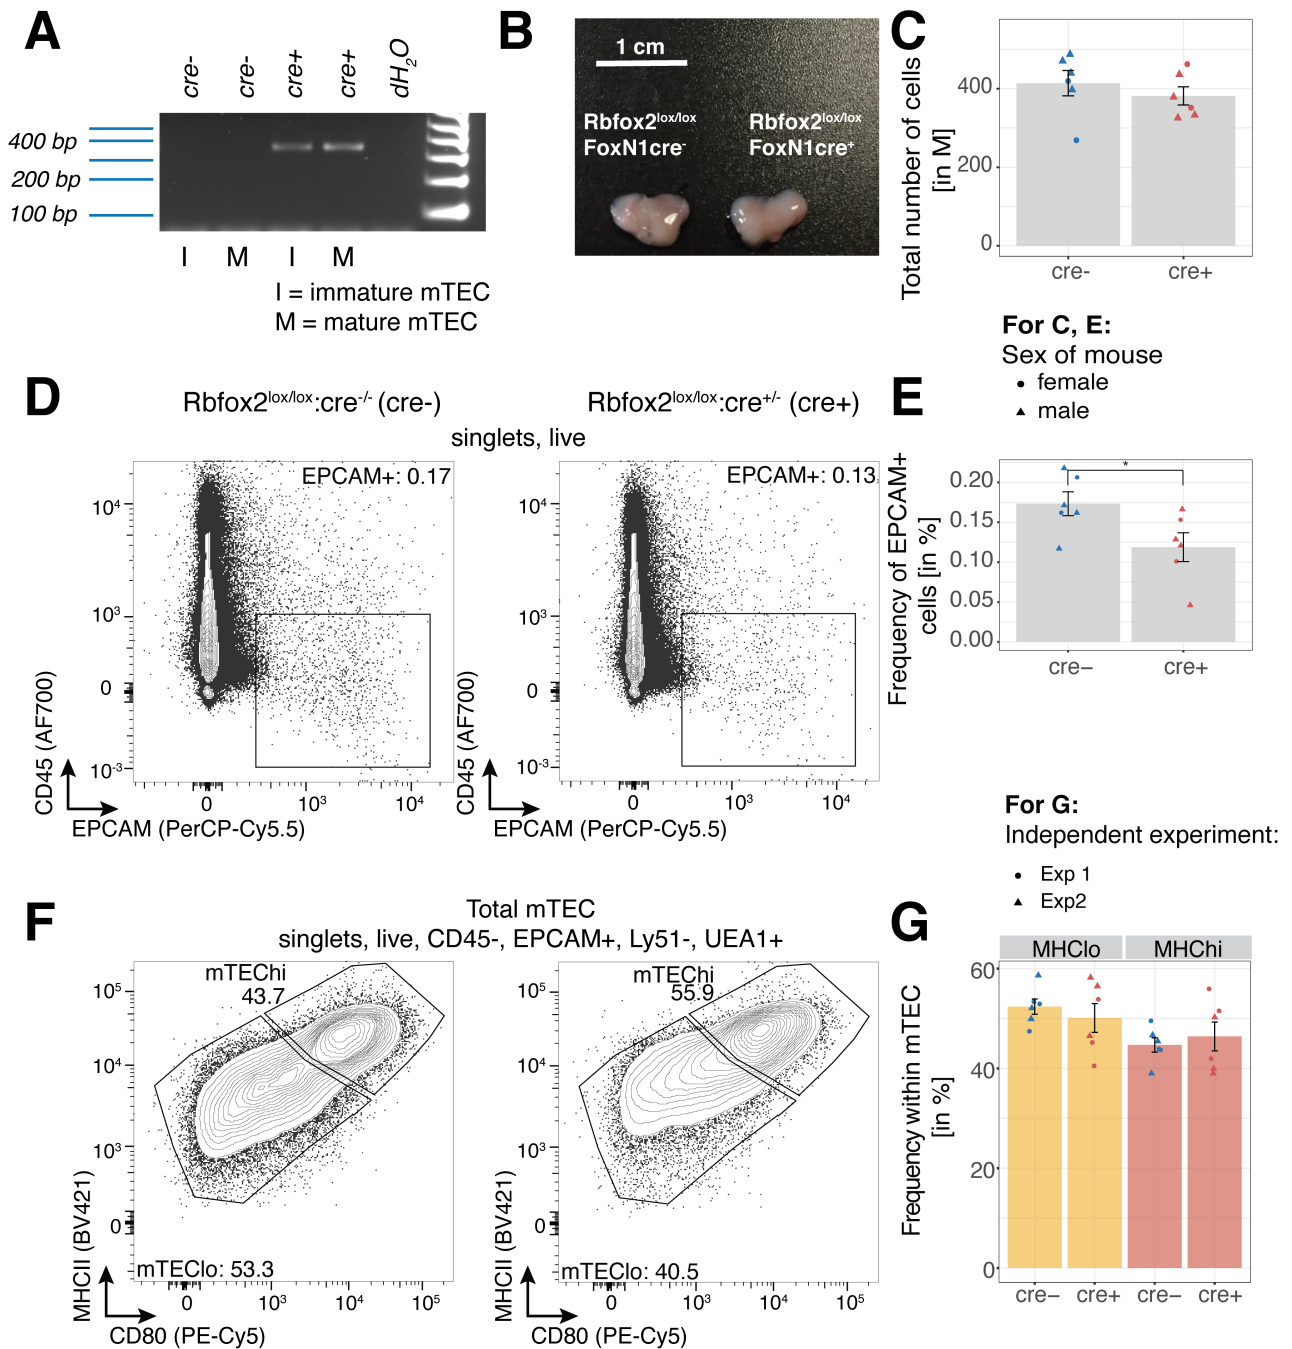

**Supplemental Figure 14: Assessment of the phenotype of *Rbfox2* deficient thymi and**

**thymic epithelial cells.** *Rbfox2*<sup>lox/lox</sup>:cre<sup>-/-</sup> (designated cre- and serving as controls) and

*Rbfox2*<sup>lox/lox</sup>:cre<sup>+/-</sup> (designated cre+) mice were compared. (A) PCR analysis of genomic exons 6

and 7 of *Rbfox2*. (B) Representative image of gross anatomy of the thymus isolated from *Rbfox2*

tKO and control mice. (C) Total thymus cellularity. The individual symbols indicate the sex of each

mouse. (D) Gating strategy for the identification of TEC. Representative graphs demonstrate the

gating for TEC (EPCAM+, CD45-) among non-enriched thymic cells isolated from the indicated

mouse strains. (E) TEC frequencies. The symbols indicate the sex of each mouse. (F) Gating

strategy for the identification of TEC subpopulations. Representative graphs demonstrate the gating for the mTEC subpopulations as defined by MHCII and CD80 expression (EPCAM+, CD45-, UEA-1+, Ly51-). (G) Frequencies of mTEC subpopulations. Representative graphs for gating of mTEC versus cTEC based on UEA-1 and Ly51 is shown in Fig. 6B. Data presented in bar graphs represents the combined results from a total of two independent experiments. A total of six 4-6 weeks old mice were used per experimental group. Significant differences of p-value < 0.05 between  $Rbfox2^{lox/lox}.cre-/-$  and  $Rbfox2^{lox/lox}.cre+/-$  using a two-sided Welch Two Sample *t*-test are indicated with \* (mean  $\pm$  SE shown in bar graphs).

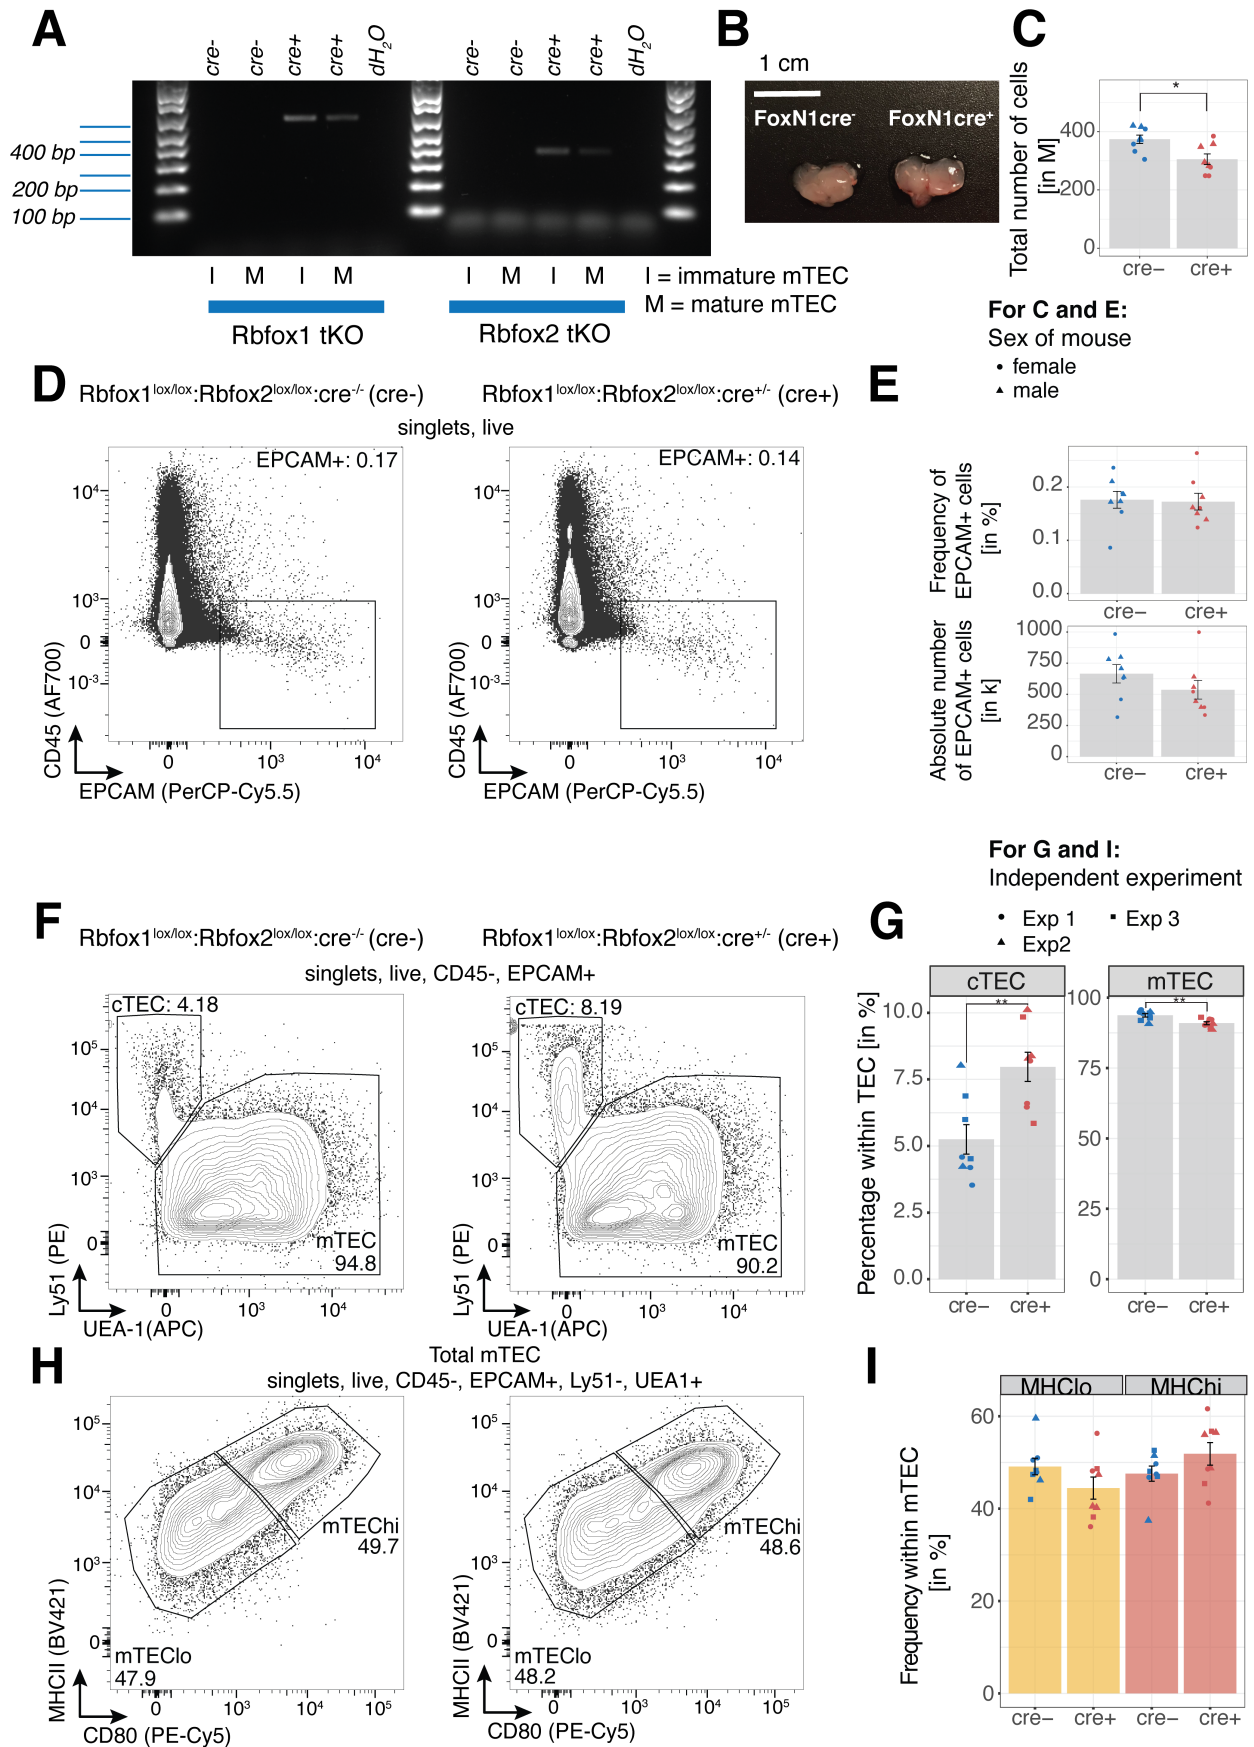

**Supplemental Figure 15: Assessment of the phenotype of *Rbfox1* and *Rbfox2* double-**

**knockout thymi and thymic epithelial cells. *Rbfox1*<sup>lox/lox</sup>;*Rbfox2*<sup>lox/lox</sup>;*cre*<sup>-/-</sup> (designated *cre*<sup>-</sup> and**

serving as controls) and *Rbfox1*<sup>lox/lox</sup>:*Rbfox2*<sup>lox/lox</sup>:cre+/- (designated cre+) mice were compared. (A) PCR analysis of genomic exons 11 and 12 of *Rbfox1* (left) and exons 6 and 7 of *Rbfox2* (right). (B) Representative image of gross anatomy of the thymus isolated from *Rbfox1*:*Rbfox2* tKO and control mice. (C) Total thymus cellularity. Symbols indicate the sex of each mouse. (D) Gating strategy for the identification of TEC. Representative graphs demonstrate the gating for TEC (EPCAM+, CD45-) among non-enriched thymic cells isolated from the indicated mouse strains. (E) TEC frequencies. The symbols indicate the sex of each mouse. (F) Gating strategy for the identification of TEC subpopulations. Representative graphs demonstrate the gating for the TEC subpopulations from enriched cells (EPCAM+, CD45-). (G) Frequencies of TEC subpopulations. (H) Gating strategy for mTEC subpopulations as defined by MHCII and CD80 expression. (I) Frequencies of mTEC subpopulations. In panels G and I, the three independent experiments are indicated by different symbols. Data presented in bar graphs represents the combined results from a total of three independent experiments. A total of eight 4-6 weeks old mice were used per experimental group (sex-matched). Significant differences of p-value < 0.05 or < 0.01 between *Rbfox1*<sup>lox/lox</sup>:*Rbfox2*<sup>lox/lox</sup>:cre-/- and *Rbfox1*<sup>lox/lox</sup>:*Rbfox2*<sup>lox/lox</sup>:cre+/- using a two-sided Welch Two Sample *t*-test are indicated with \* or \*\*, respectively (mean ± SE shown in bar graphs).

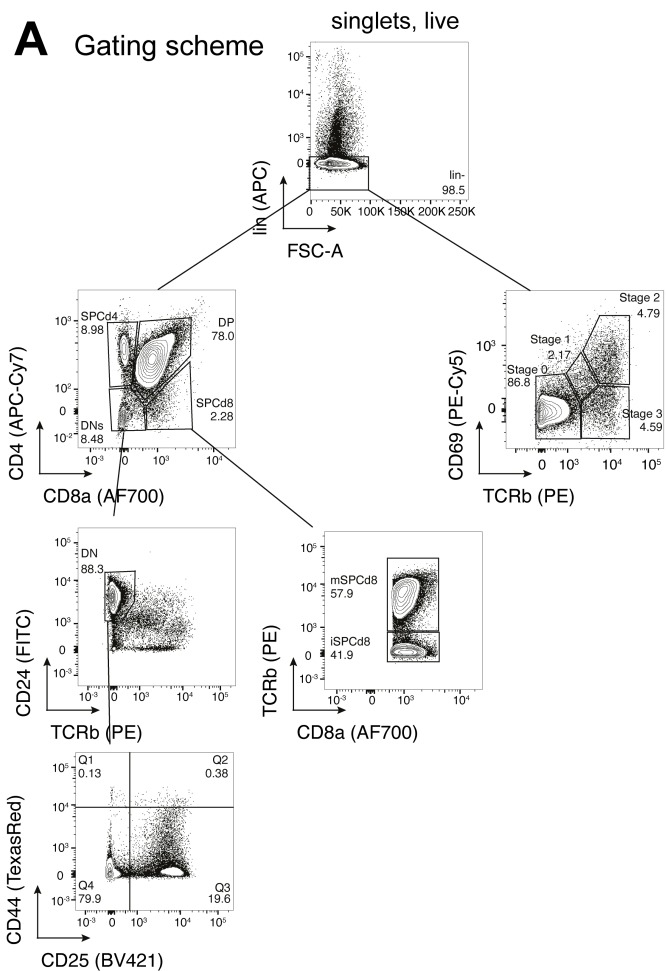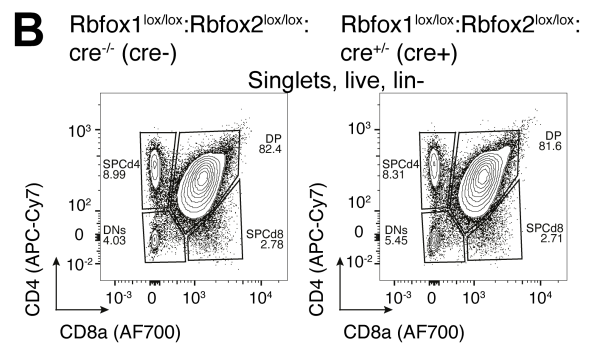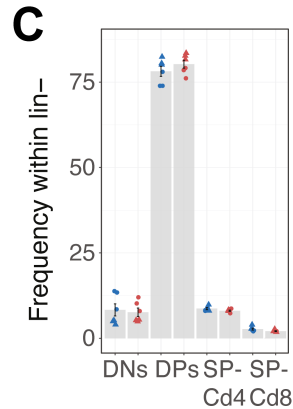

For C, E, G:

Independent experiment     Genotype

- Exp1     • cre-
- ▲ Exp2     • cre+

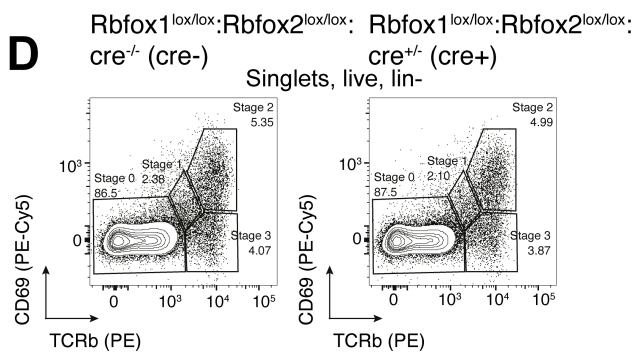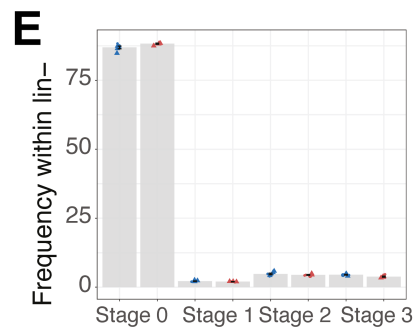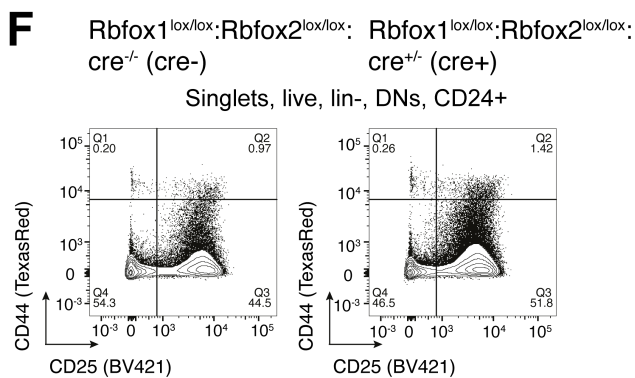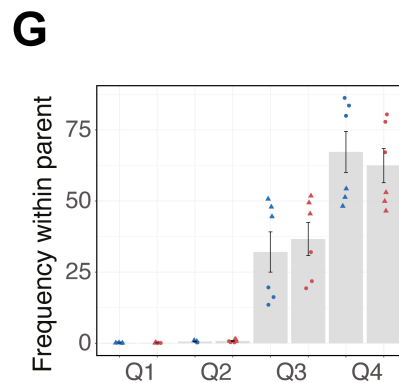

**Supplemental Figure 16: Assessment of the phenotype of developing thymocytes from**

***Rbfox1* and *Rbfox2* double knockout thymi. *Rbfox1*<sup>lox/lox</sup>;*Rbfox2*<sup>lox/lox</sup>;*cre*<sup>-/-</sup> (designated cre- and**



serving as controls ) and *Rbfox1*<sup>lox/lox</sup>:*Rbfox2*<sup>lox/lox</sup>:cre+/- (designated cre+) mice were compared.

(A) Gating strategy to define developmental stages and selection of thymocytes within the thymus. Representative graphs demonstrate the gating for different thymocyte subpopulations. DN = double-negatives, SP = single-positive, DP = double-positive. (B) Representative graphs demonstrate the gatings for CD4 and CD8 amongst total, live thymocytes. The gates define CD4 single-positive (SPCd4), CD8 single-positive (SPCd8), double-negative (DNs) and double-positive (DP) thymocytes. (C) Frequencies of thymocyte subpopulations as defined by gating in (B) from two independent experiments. (D) Representative graphs to demonstrate the gating for thymocyte subpopulations defined by CD69 and TCR- $\beta$  expression. The total, live thymocytes from the two genotypes were included in the gating. The stages represent positive selection of thymocytes, which is characterised by upregulation of CD69 indicating an interaction between the TCR and MHC molecules. (E) Frequencies of thymocyte subpopulations as defined by gating in panel D from two independent experiments. (F) Representative graph demonstrating gating for CD44 and CD25 in CD24+ double-negative thymocytes. The four quadrants represent the double-negative stages, where Q1 corresponds to DN1 (CD44+CD25-), Q2 to DN2 (CD44+CD25+), Q3 to DN3 (CD44-CD25+) and Q4 to DN4 (CD44-CD25-). (G) Frequencies of cells in DN stages as defined by gating in (F) from two independent experiments.

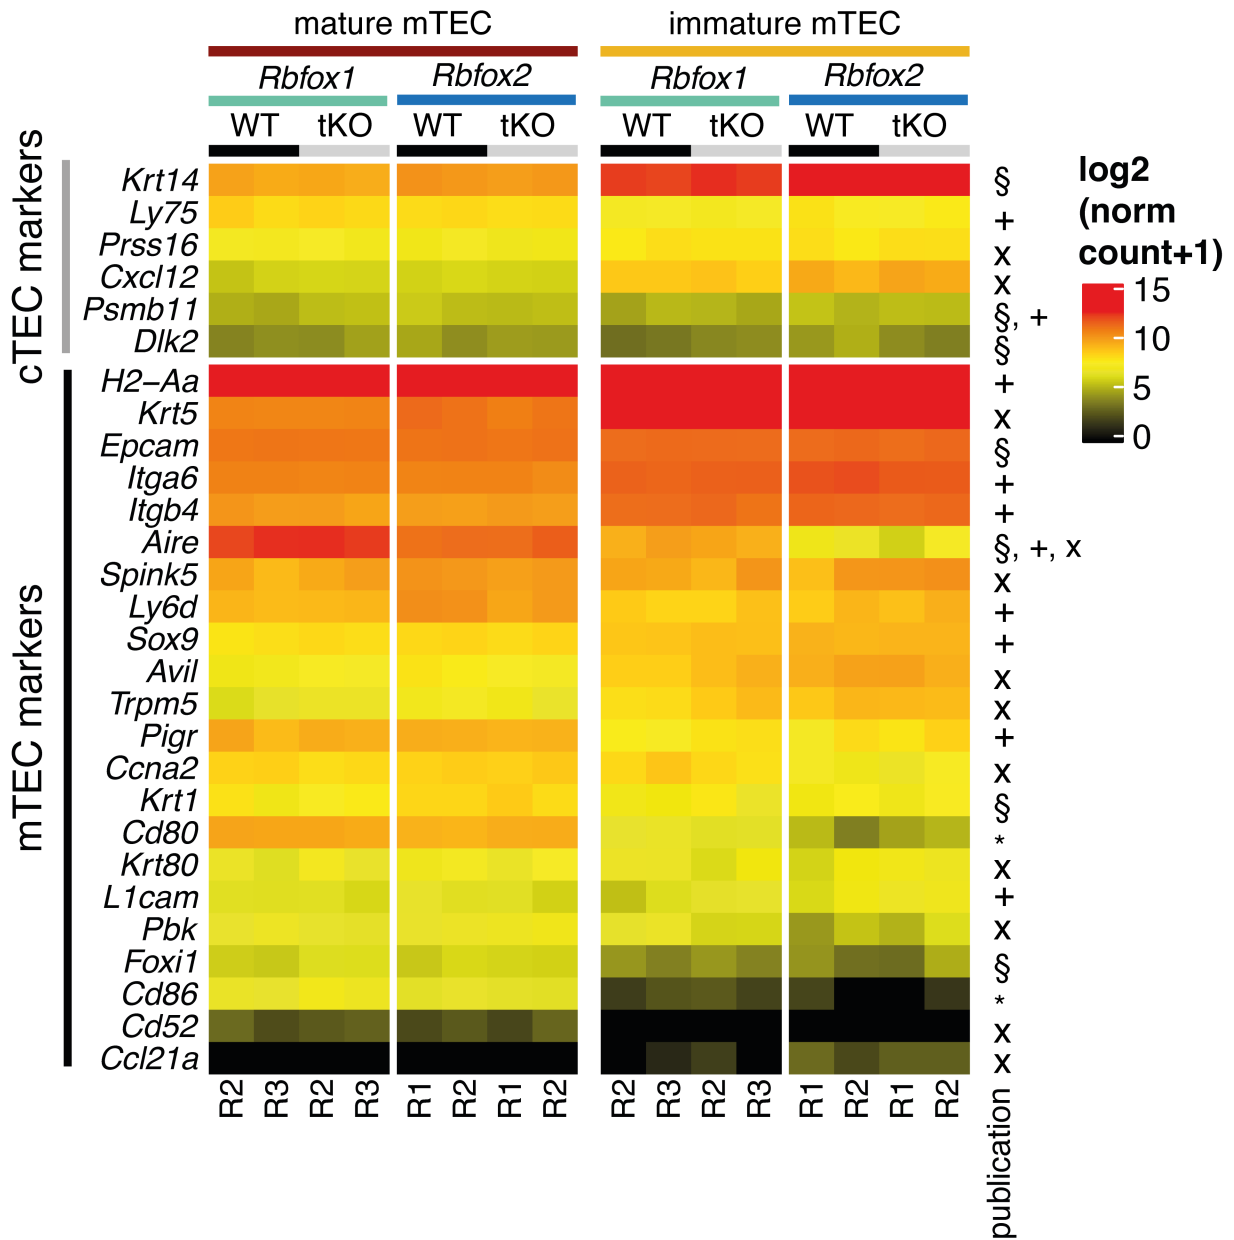

**Supplemental Figure 17: The expression of mTEC maturation and sub-population markers is not changed in *Rbfox1* or *Rbfox2* tKO mice.** The heatmap shows the expression of known TEC maturation and sub-population markers in immature and mature mTEC from *Rbfox1* and *Rbfox2* tKO mice and wildtype littermates. The set of markers was compiled from: [X] (Baran-Gale et al. 2020), [§] (Park et al. 2020) , [+] (Bornstein et al. 2018), and [\*] other commonly used TEC phenotype markers (Kadouri et al. 2020).

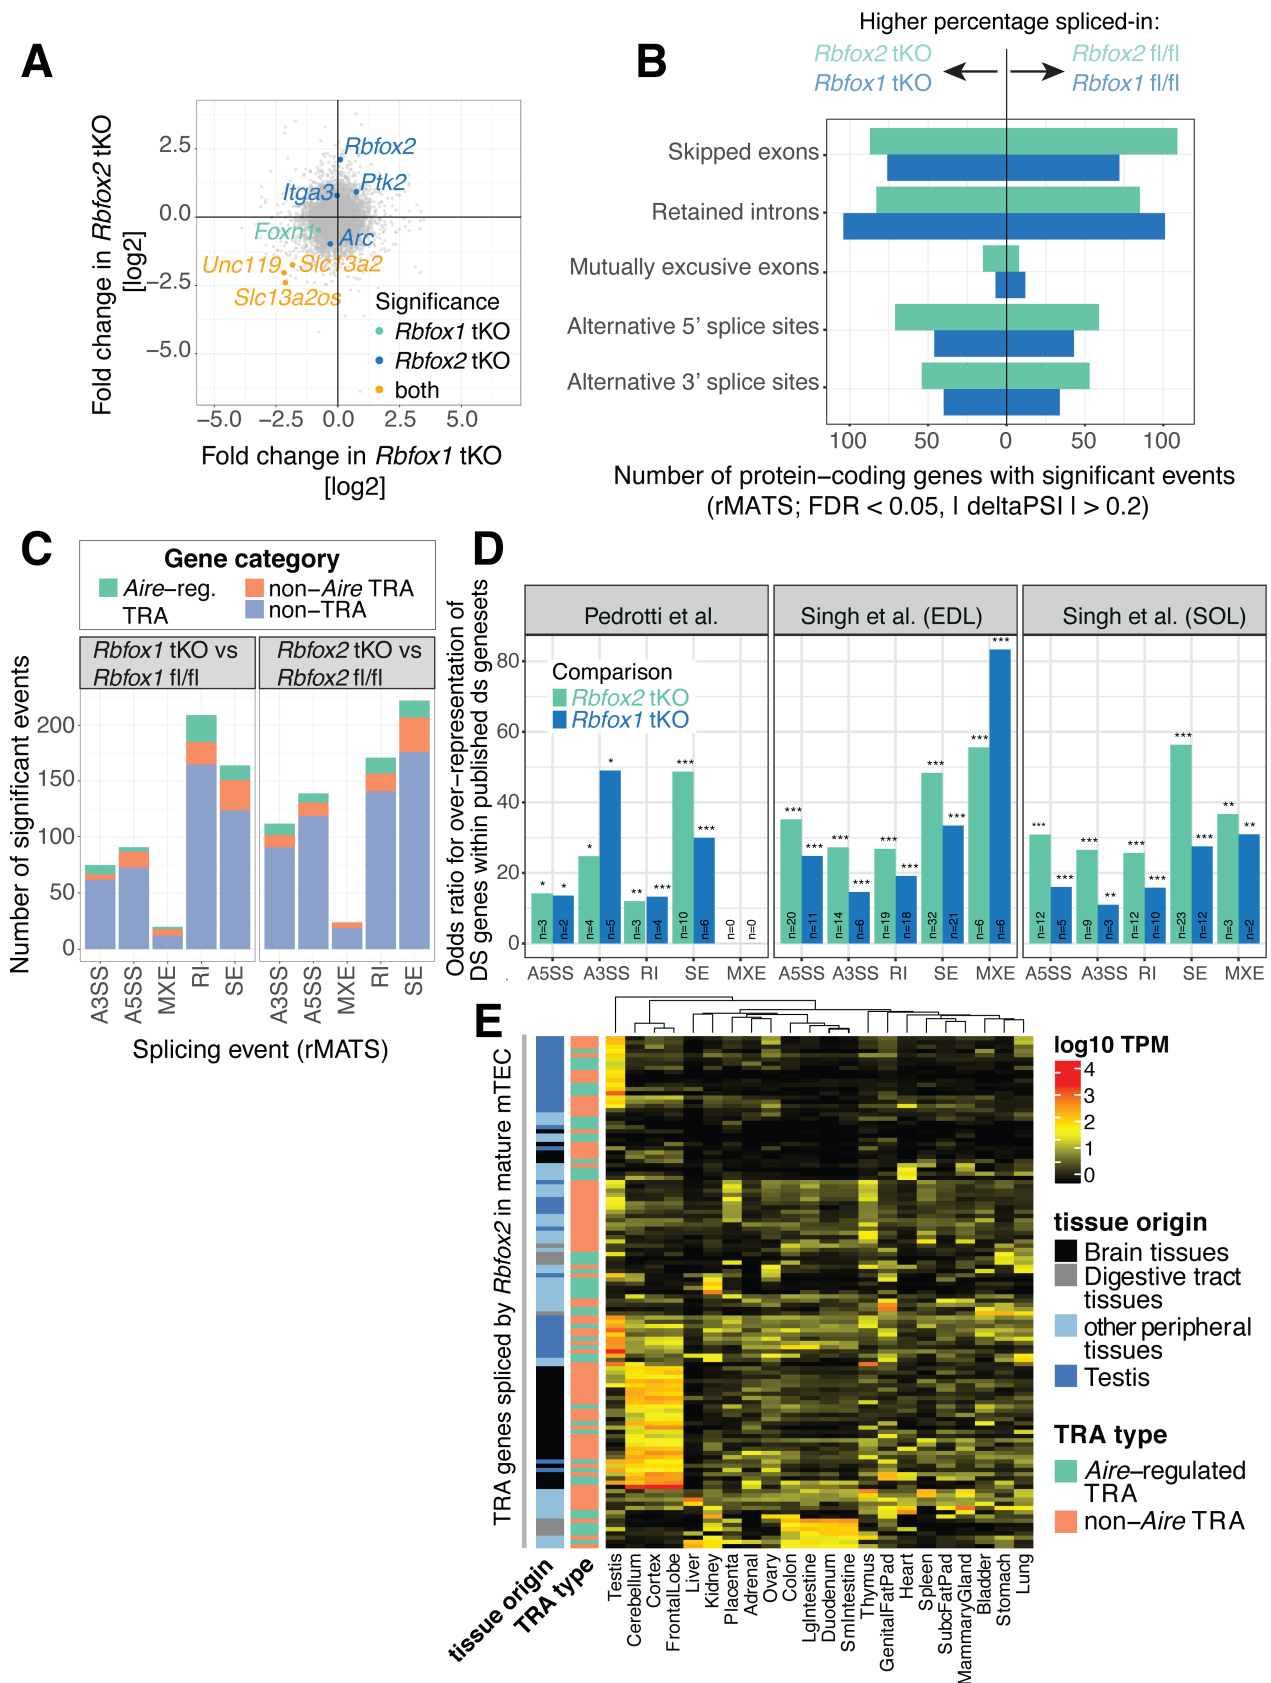

**Supplemental Figure 18: Differential gene expression and differential splicing in mature mTEC from *Rbfox1* tKO and *Rbfox2* tKO. (A) A small number of genes show differential expression in mature mTEC from *Rbfox1* tKO and *Rbfox2* tKO animals relative to littermate**

controls. The scatterplot shows changes in gene expression between the *Rbfox1* tKO vs *Rbfox1*<sup>fl/fl</sup> mature mTEC (x axis) and *Rbfox2* tKO vs *Rbfox2*<sup>fl/fl</sup> mature mTEC (y axis). Color codes: Genes significantly differentially expressed in both knockouts are shown in orange, only in the *Rbfox1* tKO mice in green and exclusively in the *Rbfox2* tKO in blue. n=2 biological replicates, DESeq2, BH adjusted  $p < 0.05$ ,  $|fc| > 1.5$ . (B) The numbers of protein-coding genes containing differential splicing events identified in mature mTEC extracted from *Rbfox1* tKO and *Rbfox2* tKO mice vs littermate controls (n=2 biological replicates, rMATS, FDR < 0.05,  $|\Delta PSI| > 0.2$ ). (C) Breakdown of the identified splicing events panel B by event type and gene category. The gene categories are defined in Supplemental Fig. 3. (D) The barplots show the enrichments (ORs) of sets of known *Rbfox* target genes (Pedrotti et al. 2015; Singh et al. 2018) in the sets of genes differentially spliced in the *Rbfox1* tKO or *Rbfox2* tKO mature mTEC (Two-sided FETs, BH adjusted p-values). \*  $p < 0.05$ , \*\*  $p < 0.01$ , \*\*\*  $p < 0.001$ ; SE=skipped exon, RI=retained intron, MXE=mutually exclusive exon, A3SS/A5SS=alternative 3'/5' splice site. (E) Expression of TRA genes with events spliced by *Rbfox2* in mature mTEC. The heatmap shows the expression of all TRA genes with differential splicing events in *Rbfox2* tKO vs littermate controls across the peripheral tissues. The colored side bar indicates the type of peripheral tissue with the highest expression and *Aire* regulation status.

**A**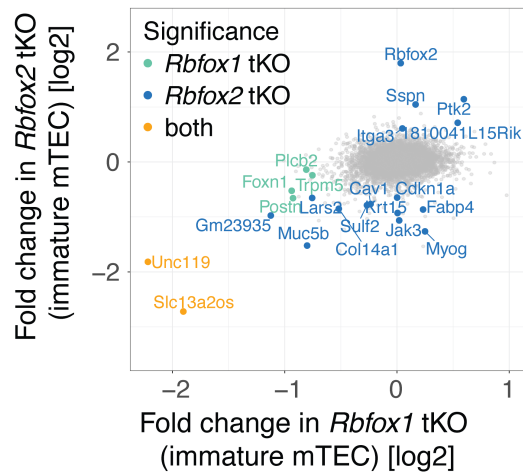**B**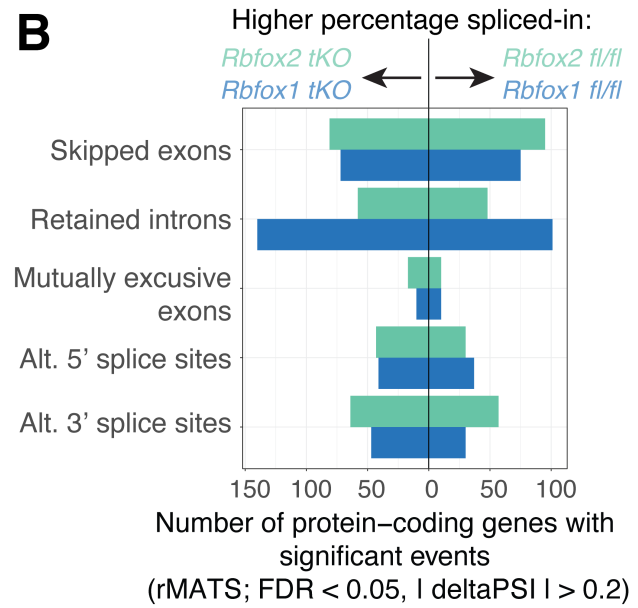**C**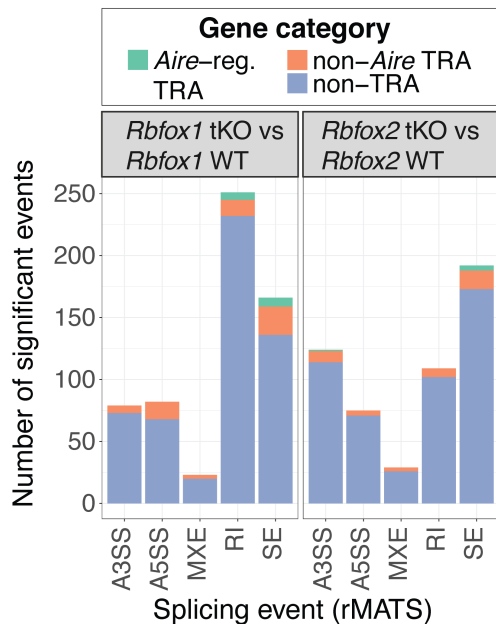**D**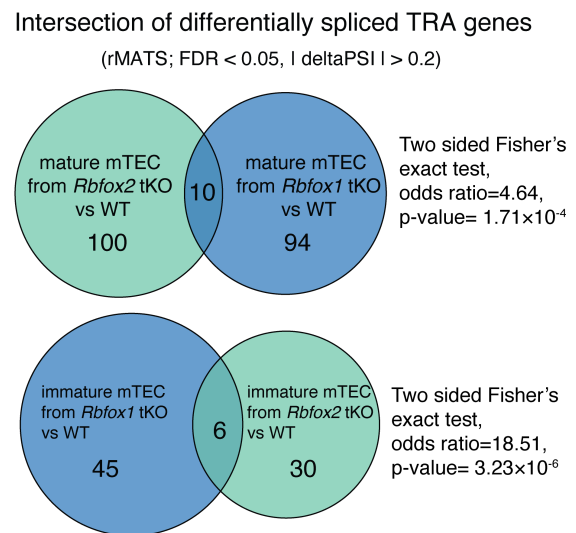**E**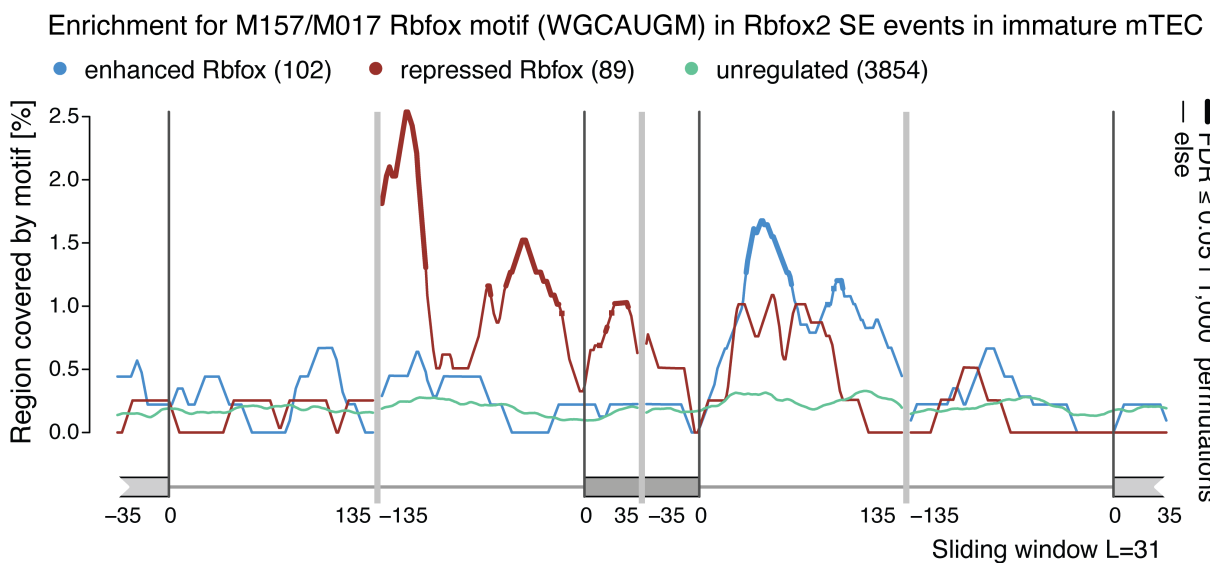

**Supplemental Figure 19: Differential gene expression and splicing in immature mTEC from *Rbfox1* tKO and *Rbfox2* tKO.** (A) The scatterplot shows changes in gene expression between the immature mTEC from *Rbfox1* tKO vs cre- littermates (x axis) and immature mTEC from *Rbfox2* tKO vs cre- littermates (y axis). Color codes: Genes significantly differentially expressed in both knockouts are shown in orange, only in the *Rbfox1* tKO mice in green and exclusively in the *Rbfox2* tKO in blue. Two biological replicates, DESeq2, BH adjusted  $p < 0.05$ ,  $|fc| > 1.5$ . (B) The numbers of protein-coding genes containing significantly differentially spliced events identified in immature mTEC extracted from *Rbfox1* tKO and *Rbfox2* tKO mice vs cre- littermate controls (n=2 biological replicates, rMATS, FDR < 0.05,  $|\Delta(d)PSI| > 0.2$ ). (C) Breakdown of the identified splicing events in panel B by event type and gene category. The gene categories are defined in Supplemental Fig. 3. (D) Venn diagram showing the overlap between TRA genes with significant differential splicing events in mature mTEC (top) and immature mTEC (bottom). (E) Enrichment of the M159/M017 *Rbfox* RRM recognition motif in the sequence around exons found to be significantly regulated by *Rbfox2* in immature mTEC. The lines show enrichments for the sets of exons that were found to be enhanced (blue) or repressed (red) or not significantly regulated (green) by *Rbfox2*. The thresholds used were  $|\Delta(d)PSI| > 0.2$  and FDR < 0.05. Thicker lines indicate regions of statistically significant enrichment (FDR  $\leq 0.05$ , n=1,000 permutations).

**A**

splicing event level intersections

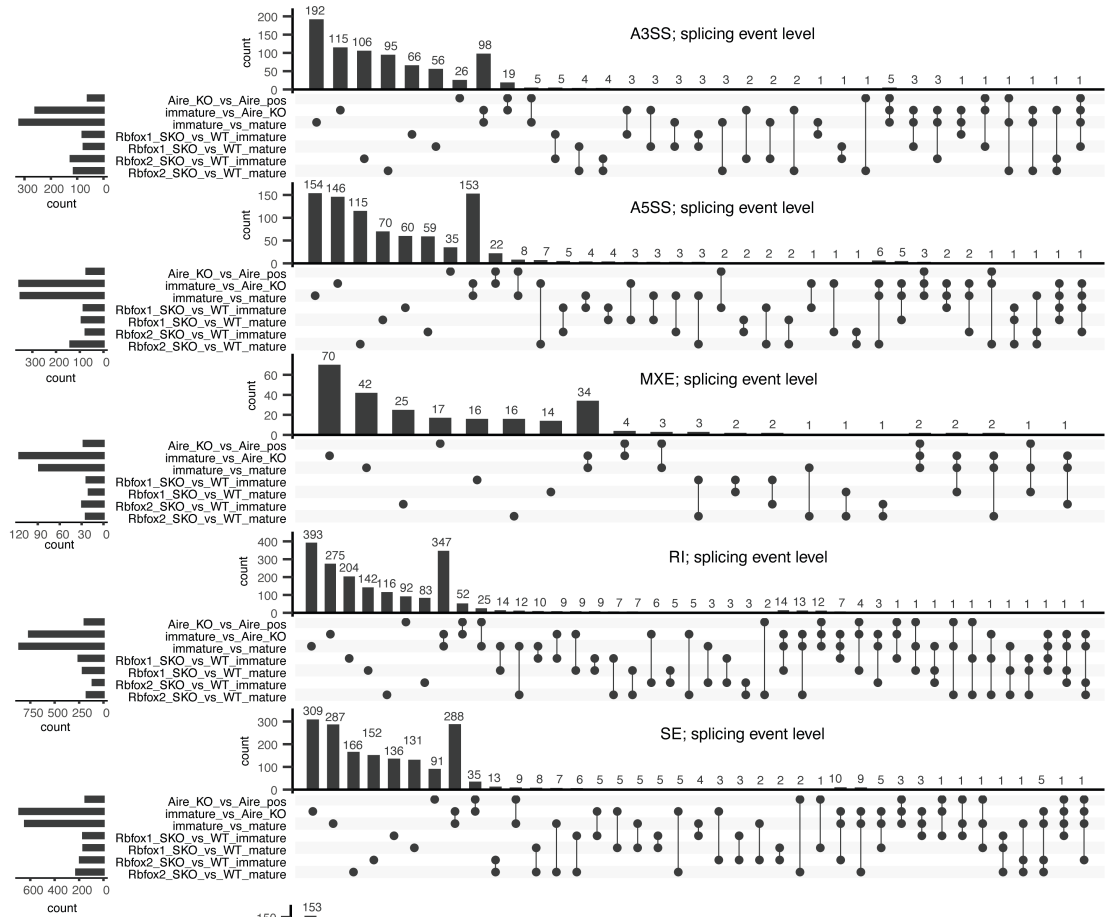

**B**

gene-level intersections

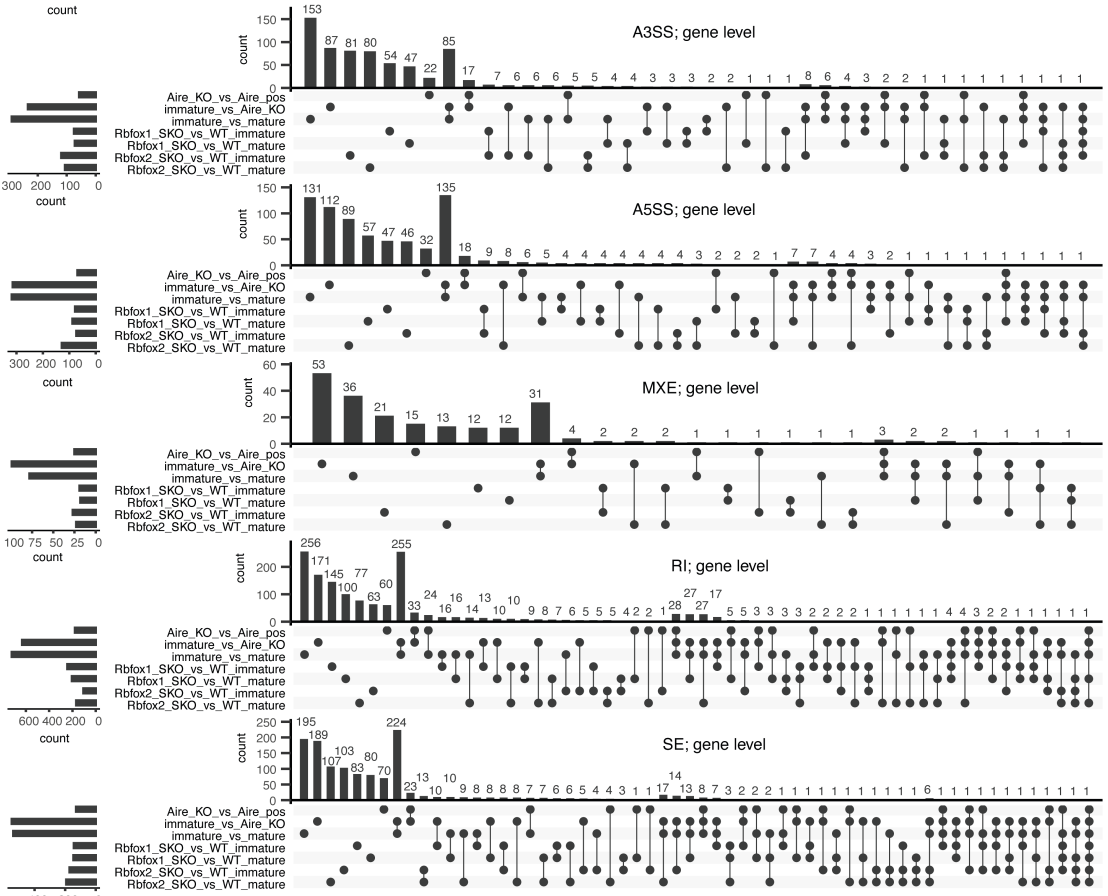

**Supplemental Figure 20: Intersection of Rbfox1, Rbfox2, Aire and maturity associated splicing events in mTEC.** The upset plots show the overlaps between significant differences in splicing identified in rMATS analyses performed for this study. The intersections are shown at the event location (A) and gene (B) levels. The different splicing event types are shown in the separate sub-panels. SE=skipped exon, MXE=mutually exclusive exon, RI=retained intron, A3SS/A5SS=alternative 3'/5' splice site.



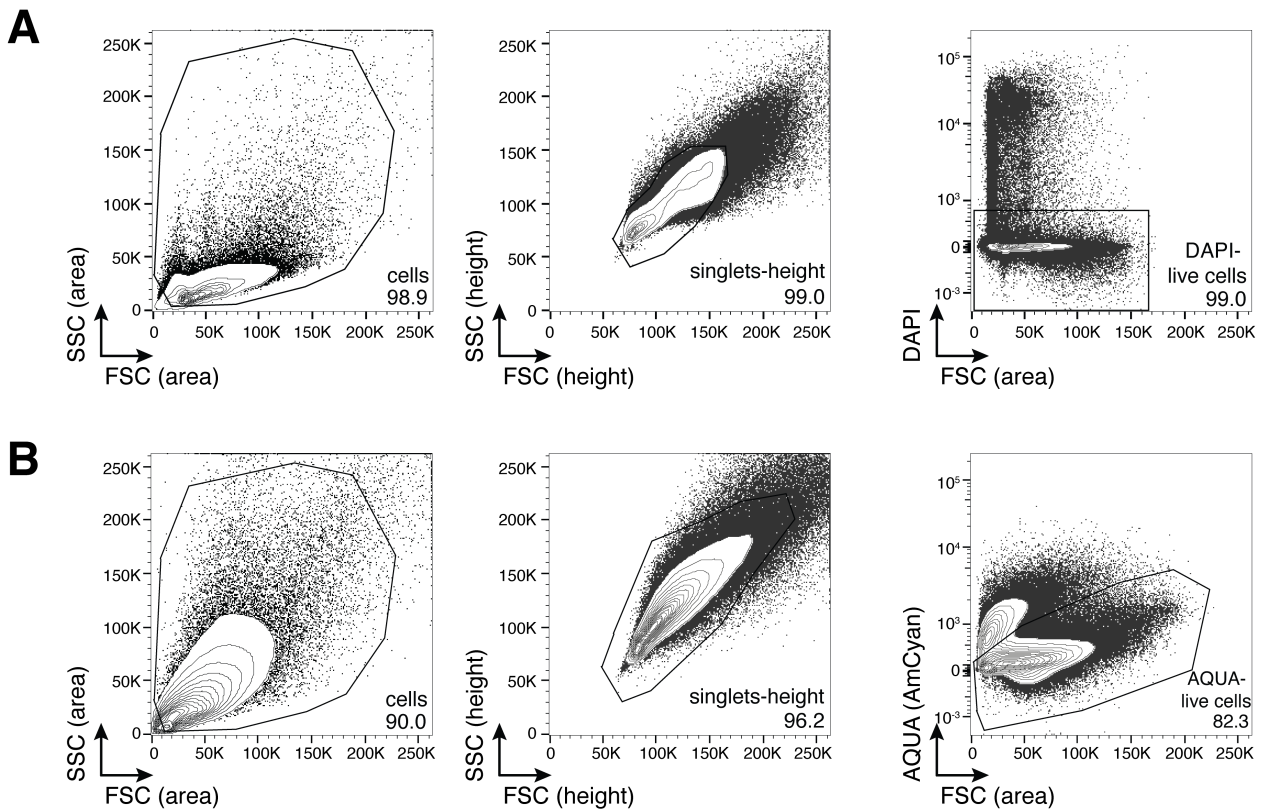

**Supplemental Figure 21: The gating strategy for isolation of live cells.** (A) Representative gating to define live cells using the absence of DAPI staining. The gating strategy includes first the gating for cells based on FSC (area) and SSC (area), then the gating for single cells based on FSC (height) and SSC (height) and finally the selection of live cells based on the absence of DAPI staining (from left to right). (B) Representative gating to define live cells using the absence of AQUA staining. The gating strategy first includes the gating for cells based on FSC (area) and SSC (area), then the gating of single cells based on FSC (height) and SSC (height) and finally the selection of live cells based on the absence of AQUA staining.

## Supplemental Tables

| Tissue                     | Data source          | Genotype                                     | No. bio-replicates | High-depth sample | Replicate pool 1 | Replicate pool 2 |
|----------------------------|----------------------|----------------------------------------------|--------------------|-------------------|------------------|------------------|
| Adrenal                    | mouse ENCODE Project | wildtype                                     | 6                  | all replicates    | R1; R5           | R2; R4           |
| Colon                      |                      | wildtype                                     | 6                  | all replicates    | R1; R4           | R2; R5           |
| Duodenum                   |                      | wildtype                                     | 7                  | all replicates    | R1; R5           | R2; R3           |
| Genital Fat Pad            |                      | wildtype                                     | 4                  | all replicates    | R3               | R4               |
| Heart                      |                      | wildtype                                     | 3                  | all replicates    | R1               | R3               |
| Kidney                     |                      | wildtype                                     | 6                  | all replicates    | R1               | R4               |
| Liver                      |                      | wildtype                                     | 6                  | all replicates    | R1; R6           | R3; R4           |
| Lung                       |                      | wildtype                                     | 4                  | all replicates    | R1               | R2; R3           |
| Mammary Gland              |                      | wildtype                                     | 6                  | all replicates    | R3               | R2; R6           |
| Ovary                      |                      | wildtype                                     | 9                  | all replicates    | R1; R10; R2      | R4; R5; R6; R7   |
| Small Intestine            |                      | wildtype                                     | 9                  | all replicates    | R1; R2           | R5; R6; R7       |
| Spleen                     |                      | wildtype                                     | 6                  | all replicates    | R1; R2           | R3; R4           |
| Stomach                    |                      | wildtype                                     | 6                  | all replicates    | R4; R5           | R1; R2           |
| Subc Fat Pad               |                      | wildtype                                     | 4                  | all replicates    | R1               | R4               |
| Testis                     |                      | wildtype                                     | 4                  | all replicates    | R1               | R3               |
| Thymus                     |                      | wildtype                                     | 6                  | all replicates    | R4               | R2; R3           |
| Frontal Lobe               |                      | wildtype                                     | 2                  | all replicates    | R1               | R2               |
| Bladder                    |                      | wildtype                                     | 2                  | all replicates    | R1               | R2               |
| Cortex                     |                      | wildtype                                     | 2                  | all replicates    | R1               | R2               |
| Placenta                   |                      | wildtype                                     | 2                  | all replicates    | R1               | R2               |
| Cerebellum                 | wildtype             | 2                                            | all replicates     | R1                | R2               |                  |
| Immature mTEC              | this study           | wildtype                                     | 2                  | all replicates    | R1               | R2               |
| Mature mTEC                |                      | wildtype                                     | 2                  | all replicates    | R1               | R2               |
| <i>Aire</i> -positive mTEC |                      | <i>Aire</i> <sup>wildtype/GFP</sup> (GFP+ve) | 2                  | all replicates    | R1               | R2               |
| <i>Aire</i> -knockout mTEC |                      | <i>Aire</i> <sup>GFP/GFP</sup> (GFP+ve)      | 2                  | all replicates    | R1               | R2               |

**Supplemental Table 1: Summary of samples used for the mT&T assembly.** The “High-depth sample”, “Replicate pool 1” and “Replicate pool 2” columns give the identifiers of the bio-replicates that were merged to generate the 200M read high-depth samples and the two 60M read replicate pools. To maintain biological replication the two 60M replicate pools were constructed from non-overlapping sets.

**Supplemental Table 2: Classification of protein-coding genes according to their *Aire*-regulation status and tissue-specificity.**

(Supplemental\_Tables.xlsx)

**Supplemental Table 3: Novel transcripts specific to mature mTEC (Fig. 3B-C).**

(Supplemental\_Tables.xlsx)

**Supplemental Table 4: Gene ontology categories enriched in protein-coding genes with TEC-specific novel transcripts (Fig. 3D).**

(Supplemental\_Tables.xlsx)

**Supplemental Table 5: Splicing events associated with maturation and *Aire* in TEC (Fig. 4A-B).**

(Supplemental\_Tables.xlsx)

**Supplemental Table 6: *Aire* regulated transcripts in mTEC (Fig. 4C-D).**

(Supplemental\_Tables.xlsx)

**Supplemental Table 7: Compilation of splicing-related genes (Supplemental Fig. 10B, 11A).**

(Supplemental\_Tables.xlsx)

| Splicing factor        | Tissue described in                 | Reference (PMID)   |
|------------------------|-------------------------------------|--------------------|
| Brdt                   | Testis                              | 15261828           |
| Celf4, Celf6           | Neurons                             | 22180311           |
| Cwc22                  | involved in spliceosome             | 23236153           |
| Elavl2, Elavl3, Elavl4 | Neurons                             | 9096138            |
| Esrp1                  | Epithelium                          | 26371508           |
| Khdrbs2                | Neurons                             | 24469635           |
| Mbni3                  | Muscle                              | 25183524           |
| Msi1                   | NSC, cancer EMT, photoreceptors     | 25380226, 27541351 |
| Nova1, Nova2           | Neurons                             | 17065982           |
| Rbfox1, Rbfox3         | Neurons                             | 27748060           |
| Rbm11                  | Neurons, Testis                     | 21984414           |
| Rbm20, Rbm24           | Muscle, Heart                       | 22466703, 25313962 |
| Slu7                   | Liver                               | 24865429           |
| Snrpn                  | embryo, neuronal (imprinted region) | 25238490           |
| Srpk2                  | Testis                              | 18653532           |
| Srpk3                  | Muscle, Heart, Spleen               | 16140986           |
| Srrm4                  | Neurons                             | 25525873, 25838543 |
| Syncrip                | Neurons                             | 30649277           |

**Supplemental Table 8: Tissue restricted and functionally investigated splicing factors (Fig. 5A).**

| Cell type     | Flow cytometry marker profile                                                   |
|---------------|---------------------------------------------------------------------------------|
| TEC           | CD45-EpCAM+                                                                     |
| cTEC          | CD45-EpCAM+Ly51+ve, UEA-1-ve                                                    |
| mTEC          | CD45-EpCAM+Ly51-ve, UEA-1+ve                                                    |
| Immature mTEC | CD45-EpCAM+Ly51-ve, UEA-1+ve<br>CD80-low, MHCII-low                             |
| Mature mTEC   | CD45-EpCAM+Ly51-ve, UEA-1+ve<br>CD80-high, MHCII-high, either AIRE+<br>or AIRE- |

**Supplemental Table 9: The FACS phenotypes of the isolated TEC populations.**

**Supplemental Table 10: Genes regulated by *Rbfox1* and *Rbfox2* in mTEC (Supplemental Fig. 18A).**

(Supplemental\_Tables.xlsx)

**Supplemental Table 11: Splicing events regulated by *Rbfox1* and *Rbfox2* in immature and mature mTEC (Fig. 7, Supplemental Figures 18, 19).**

(Supplemental\_Tables.xlsx)

| Antigen      | Fluorophore           | Concentration | Clone               | Company     |
|--------------|-----------------------|---------------|---------------------|-------------|
| CD8a         | AF700                 | 1/200         | 53-6.7              | BioLegend   |
| CD4          | APC-Cy7               | 1/1000        | RM4-5               | BioLegend   |
| TCRb         | PE                    | 1/1000        | H57-597             | eBioscience |
| CD24         | FITC                  | 1/1000        | M1/69               | BioLegend   |
| CD25         | eFluor450             | 1/500         | PC61.5              | eBioscience |
| CD44         | PE TR (PE eFluor 605) | 1/1000        | IM7                 | eBioscience |
| CD69         | PE-Cy5                | 1/1000        | H1.2F3              | BioLegend   |
| Streptavidin | APC                   | 1/1000        |                     | BioLegend   |
| CD11b        | Biotin                | 1/1000        | M1/70               | BioLegend   |
| CD11c        | Biotin                | 1/1000        | N418                | BioLegend   |
| Gr1          | Biotin                | 1/1000        | RB6-8C5             | BioLegend   |
| CD19         | Biotin                | 1/1000        | 1D3                 | eBioscience |
| CD49b        | Biotin                | 1/1000        | DX5                 | BioLegend   |
| F4/80        | Biotin                | 1/1000        | BM8                 | BioLegend   |
| NK1.1        | Biotin                | 1/500         | PK136               | BioLegend   |
| TCRgd        | Biotin                | 1/1000        | eBioGL3 (GL-3, GL3) | eBioscience |
| Ter119       | Biotin                | 1/1000        | TER-119             | BioLegend   |

**Supplemental Table 12: List of antibodies used for Supplemental Fig. 16.** The columns indicate the target antigen, the conjugated fluorophore, the concentration used in experiments, the antibody clone and the company.

| gene_type | tissue_a | tissue_b | wilcox_p | mean_frac_tissue_a | mean_frac_mTEC |
|-----------|----------|----------|----------|--------------------|----------------|
|-----------|----------|----------|----------|--------------------|----------------|

|                    |                  |             |              |      |      |
|--------------------|------------------|-------------|--------------|------|------|
| Aire-regulated TRA | GenitalFatPad_WT | mature mTEC | 0 ***        | 0.80 | 0.58 |
| Aire-regulated TRA | Testis_WT        | mature mTEC | 0 ***        | 0.78 | 0.58 |
| Aire-regulated TRA | Liver_WT         | mature mTEC | 0 ***        | 0.84 | 0.58 |
| Aire-regulated TRA | Lung_WT          | mature mTEC | 0 ***        | 0.81 | 0.58 |
| Aire-regulated TRA | Spleen_WT        | mature mTEC | 0 ***        | 0.76 | 0.58 |
| Aire-regulated TRA | FrontalLobe_WT   | mature mTEC | 0 ***        | 0.74 | 0.58 |
| Aire-regulated TRA | Cerebellum_WT    | mature mTEC | 0 ***        | 0.76 | 0.58 |
| Aire-regulated TRA | Colon_WT         | mature mTEC | 0 ***        | 0.77 | 0.58 |
| Aire-regulated TRA | Adrenal_WT       | mature mTEC | 0 ***        | 0.82 | 0.58 |
| Aire-regulated TRA | Duodenum_WT      | mature mTEC | 0 ***        | 0.82 | 0.58 |
| Aire-regulated TRA | Cortex_WT        | mature mTEC | 0 ***        | 0.77 | 0.58 |
| Aire-regulated TRA | Kidney_WT        | mature mTEC | 0 ***        | 0.82 | 0.58 |
| Aire-regulated TRA | Thymus_WT        | mature mTEC | 0.941842     | 0.58 | 0.58 |
| Aire-regulated TRA | MammaryGland_WT  | mature mTEC | 2.7e-05 ***  | 0.72 | 0.58 |
| Aire-regulated TRA | SmIntestine_WT   | mature mTEC | 0 ***        | 0.79 | 0.58 |
| Aire-regulated TRA | Bladder_WT       | mature mTEC | 0 ***        | 0.79 | 0.58 |
| Aire-regulated TRA | Stomach_WT       | mature mTEC | 0 ***        | 0.80 | 0.58 |
| Aire-regulated TRA | Ovary_WT         | mature mTEC | 0.28974      | 0.60 | 0.58 |
| Aire-regulated TRA | Heart_WT         | mature mTEC | 0 ***        | 0.85 | 0.58 |
| Aire-regulated TRA | Placenta_WT      | mature mTEC | 0 ***        | 0.76 | 0.58 |
| Aire-regulated TRA | SubcFatPad_WT    | mature mTEC | 0.002925 **  | 0.72 | 0.58 |
| non-Aire TRA       | GenitalFatPad_WT | mature mTEC | 0 ***        | 0.76 | 0.58 |
| non-Aire TRA       | Testis_WT        | mature mTEC | 0 ***        | 0.75 | 0.58 |
| non-Aire TRA       | Liver_WT         | mature mTEC | 0 ***        | 0.78 | 0.58 |
| non-Aire TRA       | Lung_WT          | mature mTEC | 5.2e-05 ***  | 0.71 | 0.58 |
| non-Aire TRA       | Spleen_WT        | mature mTEC | 0 ***        | 0.71 | 0.58 |
| non-Aire TRA       | FrontalLobe_WT   | mature mTEC | 0.002428 **  | 0.64 | 0.58 |
| non-Aire TRA       | Cerebellum_WT    | mature mTEC | 0 ***        | 0.67 | 0.58 |
| non-Aire TRA       | Colon_WT         | mature mTEC | 0.000149 *** | 0.72 | 0.58 |
| non-Aire TRA       | Adrenal_WT       | mature mTEC | 0.750801     | 0.60 | 0.58 |
| non-Aire TRA       | Duodenum_WT      | mature mTEC | 0.001944 **  | 0.70 | 0.58 |
| non-Aire TRA       | Cortex_WT        | mature mTEC | 0 ***        | 0.68 | 0.58 |
| non-Aire TRA       | Kidney_WT        | mature mTEC | 0 ***        | 0.82 | 0.58 |
| non-Aire TRA       | Thymus_WT        | mature mTEC | 0 ***        | 0.68 | 0.58 |
| non-Aire TRA       | MammaryGland_WT  | mature mTEC | 0.000605 *** | 0.70 | 0.58 |
| non-Aire TRA       | SmIntestine_WT   | mature mTEC | 6.9e-05 ***  | 0.69 | 0.58 |
| non-Aire TRA       | Bladder_WT       | mature mTEC | 1e-06 ***    | 0.72 | 0.58 |
| non-Aire TRA       | Stomach_WT       | mature mTEC | 0.000128 *** | 0.71 | 0.58 |
| non-Aire TRA       | Ovary_WT         | mature mTEC | 0.007985 **  | 0.65 | 0.58 |
| non-Aire TRA       | Heart_WT         | mature mTEC | 0 ***        | 0.78 | 0.58 |
| non-Aire TRA       | Placenta_WT      | mature mTEC | 0 ***        | 0.73 | 0.58 |
| non-Aire TRA       | SubcFatPad_WT    | mature mTEC | 0.064713 .   | 0.69 | 0.58 |
| non-TRA            | GenitalFatPad_WT | mature mTEC | 0 ***        | 0.70 | 0.68 |
| non-TRA            | Testis_WT        | mature mTEC | 0 ***        | 0.65 | 0.68 |

|         |                 |             |              |      |      |
|---------|-----------------|-------------|--------------|------|------|
| non-TRA | Liver_WT        | mature mTEC | 0 ***        | 0.60 | 0.68 |
| non-TRA | Lung_WT         | mature mTEC | 0 ***        | 0.70 | 0.68 |
| non-TRA | Spleen_WT       | mature mTEC | 0 ***        | 0.65 | 0.68 |
| non-TRA | FrontalLobe_WT  | mature mTEC | 0 ***        | 0.66 | 0.68 |
| non-TRA | Cerebellum_WT   | mature mTEC | 0.022574 *   | 0.67 | 0.68 |
| non-TRA | Colon_WT        | mature mTEC | 0 ***        | 0.65 | 0.68 |
| non-TRA | Adrenal_WT      | mature mTEC | 0 ***        | 0.62 | 0.68 |
| non-TRA | Duodenum_WT     | mature mTEC | 0 ***        | 0.59 | 0.68 |
| non-TRA | Cortex_WT       | mature mTEC | 0 ***        | 0.66 | 0.68 |
| non-TRA | Kidney_WT       | mature mTEC | 0 ***        | 0.66 | 0.68 |
| non-TRA | Thymus_WT       | mature mTEC | 0.37276      | 0.68 | 0.68 |
| non-TRA | MammaryGland_WT | mature mTEC | 0.210702     | 0.68 | 0.68 |
| non-TRA | SmIntestine_WT  | mature mTEC | 0 ***        | 0.60 | 0.68 |
| non-TRA | Bladder_WT      | mature mTEC | 4e-06 ***    | 0.69 | 0.68 |
| non-TRA | Stomach_WT      | mature mTEC | 0 ***        | 0.59 | 0.68 |
| non-TRA | Ovary_WT        | mature mTEC | 0.000262 *** | 0.67 | 0.68 |
| non-TRA | Heart_WT        | mature mTEC | 0 ***        | 0.63 | 0.68 |
| non-TRA | Placenta_WT     | mature mTEC | 1e-05 ***    | 0.69 | 0.68 |
| non-TRA | SubcFatPad_WT   | mature mTEC | 0 ***        | 0.70 | 0.68 |

**Supplemental Table 13:** The results of two-sided Wilcoxon tests (Mann-Whitney) testing for differences in the fraction of isoforms detected in peripheral tissues vs mature mTEC (Fig. 2A).

The mean fraction of isoforms for each peripheral tissue and mature mTEC is reported in columns 5 and 6.

| Analysis                                                                                                                            | Bio-replicates per sample | Animals per replicate | Sex of mice                                                                       | Age of mice | Read depth (after deduplication and removing unmapped reads) | RNA seq details                                                       |
|-------------------------------------------------------------------------------------------------------------------------------------|---------------------------|-----------------------|-----------------------------------------------------------------------------------|-------------|--------------------------------------------------------------|-----------------------------------------------------------------------|
| rMATS and kallisto comparisons of wildtype immature, wildtype mature, <i>Aire</i> -knockout and <i>Aire</i> -positive mTEC (Fig. 4) | 2                         | multiple              | Female                                                                            | 4-6 weeks   | 130 M                                                        | 101 bp, stranded, paired-end (dUTP-based protocol)                    |
| rMATS analysis of <i>Rbfox1</i> and <i>Rbfox2</i> conditional knockouts, (immature and mature) mTEC (Figures 6,7)                   | 2                         | 1                     | Sex-matched littermates, (1 pair of Females, 1 pair of Males for each comparison) | 4-6 weeks   | 14.5 M                                                       | 150bp, stranded, paired-end protocol including polyA-enrichment (NEB) |

**Supplemental Table 14:** Summary of the samples and RNA-sequencing data used for rMATS and kallisto alternative splicing/differential transcript usage analyses shown in Figures 4, 6 and 7.

## Supplemental References

- Alamancos GP, Pages A, Trincado JL, Bellora N, Eyra E. 2015. Leveraging transcript quantification for fast computation of alternative splicing profiles. *RNA* **21**: 1521-1531.
- Baran-Gale J, Morgan MD, Maio S, Dhalla F, Calvo-Asensio I, Deadman ME, Handel AE, Maynard A, Chen S, Green F et al. 2020. Ageing compromises mouse thymus function and remodels epithelial cell differentiation. *Elife* **9**.
- Barbosa-Morais NL, Carmo-Fonseca M, Aparicio S. 2006. Systematic genome-wide annotation of spliceosomal proteins reveals differential gene family expansion. *Genome Res* **16**: 66-77.
- Bornstein C, Nevo S, Giladi A, Kadouri N, Pouzolles M, Gerbe F, David E, Machado A, Chuprin A, Toth B et al. 2018. Single-cell mapping of the thymic stroma identifies IL-25-producing tuft epithelial cells. *Nature* **559**: 622-626.
- Bray NL, Pimentel H, Melsted P, Pachter L. 2016. Near-optimal probabilistic RNA-seq quantification. *Nat Biotechnol* **34**: 525-527.
- Carbon S, Ireland A, Mungall CJ, Shu S, Marshall B, Lewis S, Ami GOH, Web Presence Working G. 2009. AmiGO: online access to ontology and annotation data. *Bioinformatics* **25**: 288-289.
- Chen M, Manley JL. 2009. Mechanisms of alternative splicing regulation: insights from molecular and genomics approaches. *Nat Rev Mol Cell Biol* **10**: 741-754.
- Chew SL. 1997. Alternative splicing of mRNA as a mode of endocrine regulation. *Trends Endocrinol Metab* **8**: 405-413.
- Chuprin A, Avin A, Goldfarb Y, Herzig Y, Levi B, Jacob A, Sela A, Katz S, Grossman M, Guyon C et al. 2015. The deacetylase Sirt1 is an essential regulator of Aire-mediated induction of central immunological tolerance. *Nat Immunol* **16**: 737-745.
- Cook KB, Kazan H, Zuberi K, Morris Q, Hughes TR. 2011. RBPDB: a database of RNA-binding specificities. *Nucleic Acids Res* **39**: D301-308.
- Danan-Gotthold M, Guyon C, Giraud M, Levanon EY, Abramson J. 2016. Extensive RNA editing and splicing increase immune self-representation diversity in medullary thymic epithelial cells. *Genome Biol* **17**: 219.
- de Jonge HJ, Fehrmann RS, de Bont ES, Hofstra RM, Gerbens F, Kamps WA, de Vries EG, van der Zee AG, te Meerman GJ, ter Elst A. 2007. Evidence based selection of housekeeping genes. *PLoS One* **2**: e898.
- Dhalla F, Baran-Gale J, Maio S, Chappell L, Hollander GA, Ponting CP. 2020. Biologically indeterminate yet ordered promiscuous gene expression in single medullary thymic epithelial cells. *EMBO J* **39**: e101828.
- Dobin A, Davis CA, Schlesinger F, Drenkow J, Zaleski C, Jha S, Batut P, Chaisson M, Gingeras TR. 2013. STAR: ultrafast universal RNA-seq aligner. *Bioinformatics* **29**: 15-21.
- Gohr A, Irimia M. 2019. Matt: Unix tools for alternative splicing analysis. *Bioinformatics* **35**: 130-132.
- Gromak N, Matlin AJ, Cooper TA, Smith CW. 2003. Antagonistic regulation of alpha-actinin alternative splicing by CELF proteins and polypyrimidine tract binding protein. *RNA* **9**: 443-456.
- Grosso AR, Gomes AQ, Barbosa-Morais NL, Caldeira S, Thorne NP, Grech G, von Lindern M, Carmo-Fonseca M. 2008. Tissue-specific splicing factor gene expression signatures. *Nucleic Acids Res* **36**: 4823-4832.
- Han H, Irimia M, Ross PJ, Sung HK, Alipanahi B, David L, Golipour A, Gabut M, Michael IP, Nachman EN et al. 2013. MBNL proteins repress ES-cell-specific alternative splicing and reprogramming. *Nature* **498**: 241-245.
- Handel AE, Shikama-Dorn N, Zhanybekova S, Maio S, Graedel AN, Zuklys S, Ponting CP, Hollander GA. 2018. Comprehensively Profiling the Chromatin Architecture of Tissue Restricted Antigen Expression in Thymic Epithelial Cells Over Development. *Front Immunol* **9**: 2120.

- Jangi M, Sharp PA. 2014. Building robust transcriptomes with master splicing factors. *Cell* **159**: 487-498.
- Kadouri N, Nevo S, Goldfarb Y, Abramson J. 2020. Thymic epithelial cell heterogeneity: TEC by TEC. *Nat Rev Immunol* **20**: 239-253.
- Katz Y, Wang ET, Airoidi EM, Burge CB. 2010. Analysis and design of RNA sequencing experiments for identifying isoform regulation. *Nat Methods* **7**: 1009-1015.
- Keane P, Ceredig R, Seoighe C. 2015. Promiscuous mRNA splicing under the control of AIRE in medullary thymic epithelial cells. *Bioinformatics* **31**: 986-990.
- Kim D, Paggi JM, Park C, Bennett C, Salzberg SL. 2019. Graph-based genome alignment and genotyping with HISAT2 and HISAT-genotype. *Nat Biotechnol* **37**: 907-915.
- Kryuchkova-Mostacci N, Robinson-Rechavi M. 2017. A benchmark of gene expression tissue-specificity metrics. *Brief Bioinform* **18**: 205-214.
- Li H. 2018. Minimap2: pairwise alignment for nucleotide sequences. *Bioinformatics* **34**: 3094-3100.
- Li H, Handsaker B, Wysoker A, Fennell T, Ruan J, Homer N, Marth G, Abecasis G, Durbin R, Genome Project Data Processing S. 2009. The Sequence Alignment/Map format and SAMtools. *Bioinformatics* **25**: 2078-2079.
- Liao Y, Smyth GK, Shi W. 2014. featureCounts: an efficient general purpose program for assigning sequence reads to genomic features. *Bioinformatics* **30**: 923-930.
- Love MI, Huber W, Anders S. 2014. Moderated estimation of fold change and dispersion for RNA-seq data with DESeq2. *Genome Biol* **15**: 550.
- Merkin J, Russell C, Chen P, Burge CB. 2012. Evolutionary dynamics of gene and isoform regulation in Mammalian tissues. *Science* **338**: 1593-1599.
- Park JE, Botting RA, Dominguez Conde C, Popescu DM, Lavaert M, Kunz DJ, Goh I, Stephenson E, Ragazzini R, Tuck E et al. 2020. A cell atlas of human thymic development defines T cell repertoire formation. *Science* **367**.
- Patro R, Duggal G, Love MI, Irizarry RA, Kingsford C. 2017. Salmon provides fast and bias-aware quantification of transcript expression. *Nat Methods* **14**: 417-419.
- Pedrotti S, Giudice J, Dagnino-Acosta A, Knoblauch M, Singh RK, Hanna A, Mo Q, Hicks J, Hamilton S, Cooper TA. 2015. The RNA-binding protein Rbfox1 regulates splicing required for skeletal muscle structure and function. *Hum Mol Genet* **24**: 2360-2374.
- Pertea M, Pertea GM, Antonescu CM, Chang TC, Mendell JT, Salzberg SL. 2015. StringTie enables improved reconstruction of a transcriptome from RNA-seq reads. *Nat Biotechnol* **33**: 290-295.
- Pervouchine DD, Djebali S, Breschi A, Davis CA, Barja PP, Dobin A, Tanzer A, Lagarde J, Zaleski C, See LH et al. 2015. Enhanced transcriptome maps from multiple mouse tissues reveal evolutionary constraint in gene expression. *Nat Commun* **6**: 5903.
- Pervouchine DD, Knowles DG, Guigo R. 2013. Intron-centric estimation of alternative splicing from RNA-seq data. *Bioinformatics* **29**: 273-274.
- Pimentel H, Bray NL, Puente S, Melsted P, Pachter L. 2017. Differential analysis of RNA-seq incorporating quantification uncertainty. *Nat Methods* **14**: 687-690.
- Sansom SN, Shikama-Dorn N, Zhanybekova S, Nusspaumer G, Macaulay IC, Deadman ME, Heger A, Ponting CP, Hollander GA. 2014. Population and single-cell genomics reveal the Aire dependency, relief from Polycomb silencing, and distribution of self-antigen expression in thymic epithelia. *Genome Res* **24**: 1918-1931.
- Shen S, Park JW, Lu ZX, Lin L, Henry MD, Wu YN, Zhou Q, Xing Y. 2014. rMATS: robust and flexible detection of differential alternative splicing from replicate RNA-Seq data. *Proc Natl Acad Sci U S A* **111**: E5593-5601.
- Singh RK, Kolonin AM, Fiorotto ML, Cooper TA. 2018. Rbfox-Splicing Factors Maintain Skeletal Muscle Mass by Regulating Calpain3 and Proteostasis. *Cell Rep* **24**: 197-208.



- St-Pierre C, Brochu S, Vanegas JR, Dumont-Lagace M, Lemieux S, Perreault C. 2013. Transcriptome sequencing of neonatal thymic epithelial cells. *Sci Rep* **3**: 1860.
- St-Pierre C, Trofimov A, Brochu S, Lemieux S, Perreault C. 2015. Differential Features of AIRE-Induced and AIRE-Independent Promiscuous Gene Expression in Thymic Epithelial Cells. *J Immunol* **195**: 498-506.
