# Supplementary material for: RBFOX splicing factors contribute to a broad but selective recapitulation of peripheral tissue splicing patterns in the thymus
Source: Genome Res. 2021 Nov;31(11):2022–34. doi: 10.1101/gr.275245.121 (PMC8559713; doi:10.1101/gr.275245.121)
Supplement: Supplemental Material [file supp_gr.275245.121_Supplemental_Tables.xlsx]

## Sheet: Index
	Supplemental Table 2	Classification of protein-coding genes according to their Aire- regulation status and tissue-specificity
	Supplemental Table 3	Novel transcripts specific to mature mTEC
	Supplemental Table 4	Gene ontology categories enriched in protein-coding genes with TEC-specific novel transcripts
	Supplemental Table 5	Splicing events associated with maturation and Aire in TEC
	Supplemental Table 6	Aire regulated transcripts in mTEC
	Supplemental Table 7	Compilation of splicing-related genes
	Supplemental Table 10	Genes regulated by Rbfox1 or Rbfox2 in mTEC
	Supplemental Table 11	Splicing events regulated by Rbfox1 and Rbfox2 in immature and mature mTEC

## Sheet: Supp. Table 2
gene_id	TRA type	Aire_status	Tissue_status
ENSMUSG00000000001	non-TRA	not_Aire_regulated	not_restricted
ENSMUSG00000000003	Aire-regulated TRA	Aire_regulated	restricted
ENSMUSG00000000028	non-TRA	not_Aire_regulated	not_restricted
ENSMUSG00000000037	Aire-regulated TRA	Aire_regulated	restricted
ENSMUSG00000000049	non-Aire TRA	not_Aire_regulated	restricted
ENSMUSG00000000056	non-TRA	not_Aire_regulated	not_restricted
ENSMUSG00000000058	non-TRA	not_Aire_regulated	not_restricted
ENSMUSG00000000078	non-TRA	not_Aire_regulated	not_restricted
ENSMUSG00000000085	non-TRA	not_Aire_regulated	not_restricted
ENSMUSG00000000088	non-TRA	not_Aire_regulated	not_restricted
ENSMUSG00000000093	non-TRA	Aire_regulated	not_restricted
ENSMUSG00000000094	Aire-regulated TRA	Aire_regulated	restricted
ENSMUSG00000000103	non-Aire TRA	not_Aire_regulated	restricted
ENSMUSG00000000120	non-TRA	Aire_regulated	not_restricted
ENSMUSG00000000125	non-Aire TRA	not_Aire_regulated	restricted
ENSMUSG00000000126	non-TRA	Aire_regulated	not_restricted
ENSMUSG00000000127	non-TRA	not_Aire_regulated	not_restricted
ENSMUSG00000000131	non-TRA	not_Aire_regulated	not_restricted
ENSMUSG00000000134	non-TRA	not_Aire_regulated	not_restricted
ENSMUSG00000000142	non-TRA	not_Aire_regulated	not_restricted
ENSMUSG00000000148	non-TRA	not_Aire_regulated	not_restricted
ENSMUSG00000000149	non-TRA	not_Aire_regulated	not_restricted
ENSMUSG00000000154	non-TRA	not_Aire_regulated	not_restricted
ENSMUSG00000000157	Aire-regulated TRA	Aire_regulated	restricted
ENSMUSG00000000159	non-TRA	Aire_regulated	not_restricted
ENSMUSG00000000167	non-Aire TRA	not_Aire_regulated	restricted
ENSMUSG00000000168	non-TRA	not_Aire_regulated	not_restricted
ENSMUSG00000000171	non-TRA	not_Aire_regulated	not_restricted
ENSMUSG00000000182	Aire-regulated TRA	Aire_regulated	restricted
ENSMUSG00000000183	Aire-regulated TRA	Aire_regulated	restricted
ENSMUSG00000000184	non-TRA	not_Aire_regulated	not_restricted
ENSMUSG00000000194	non-TRA	not_Aire_regulated	not_restricted
ENSMUSG00000000197	Aire-regulated TRA	Aire_regulated	restricted
ENSMUSG00000000202	Aire-regulated TRA	Aire_regulated	restricted
ENSMUSG00000000204	Aire-regulated TRA	Aire_regulated	restricted
ENSMUSG00000000214	Aire-regulated TRA	Aire_regulated	restricted
ENSMUSG00000000215	Aire-regulated TRA	Aire_regulated	restricted
ENSMUSG00000000216	non-Aire TRA	not_Aire_regulated	restricted
ENSMUSG00000000223	non-Aire TRA	not_Aire_regulated	restricted
ENSMUSG00000000244	Aire-regulated TRA	Aire_regulated	restricted
ENSMUSG00000000247	Aire-regulated TRA	Aire_regulated	restricted
ENSMUSG00000000248	Aire-regulated TRA	Aire_regulated	restricted
ENSMUSG00000000253	non-TRA	not_Aire_regulated	not_restricted
ENSMUSG00000000263	Aire-regulated TRA	Aire_regulated	restricted
ENSMUSG00000000266	non-TRA	not_Aire_regulated	not_restricted
ENSMUSG00000000275	non-TRA	not_Aire_regulated	not_restricted
ENSMUSG00000000276	non-TRA	not_Aire_regulated	not_restricted
ENSMUSG00000000278	non-TRA	not_Aire_regulated	not_restricted
ENSMUSG00000000282	non-TRA	not_Aire_regulated	not_restricted
ENSMUSG00000000290	non-TRA	Aire_regulated	not_restricted
ENSMUSG00000000295	non-TRA	not_Aire_regulated	not_restricted
ENSMUSG00000000296	non-TRA	not_Aire_regulated	not_restricted
ENSMUSG00000000301	non-TRA	not_Aire_regulated	not_restricted
ENSMUSG00000000303	non-TRA	not_Aire_regulated	not_restricted
ENSMUSG00000000305	non-Aire TRA	not_Aire_regulated	restricted
ENSMUSG00000000308	non-TRA	not_Aire_regulated	not_restricted
ENSMUSG00000000317	non-TRA	not_Aire_regulated	not_restricted
ENSMUSG00000000318	non-TRA	Aire_regulated	not_restricted
ENSMUSG00000000320	non-TRA	not_Aire_regulated	not_restricted
ENSMUSG00000000325	non-TRA	not_Aire_regulated	not_restricted
ENSMUSG00000000326	non-TRA	not_Aire_regulated	not_restricted
ENSMUSG00000000339	non-TRA	not_Aire_regulated	not_restricted
ENSMUSG00000000340	non-TRA	not_Aire_regulated	not_restricted
ENSMUSG00000000346	non-TRA	not_Aire_regulated	not_restricted
ENSMUSG00000000355	non-TRA	not_Aire_regulated	not_restricted
ENSMUSG00000000359	non-TRA	not_Aire_regulated	not_restricted
ENSMUSG00000000365	Aire-regulated TRA	Aire_regulated	restricted
ENSMUSG00000000374	non-TRA	not_Aire_regulated	not_restricted
ENSMUSG00000000378	non-TRA	not_Aire_regulated	not_restricted
ENSMUSG00000000381	Aire-regulated TRA	Aire_regulated	restricted
ENSMUSG00000000384	non-TRA	not_Aire_regulated	not_restricted
ENSMUSG00000000385	non-TRA	not_Aire_regulated	not_restricted
ENSMUSG00000000386	non-Aire TRA	not_Aire_regulated	restricted
ENSMUSG00000000392	Aire-regulated TRA	Aire_regulated	restricted
ENSMUSG00000000394	Aire-regulated TRA	Aire_regulated	restricted
ENSMUSG00000000399	non-TRA	not_Aire_regulated	not_restricted
ENSMUSG00000000402	Aire-regulated TRA	Aire_regulated	restricted
ENSMUSG00000000409	non-TRA	not_Aire_regulated	not_restricted
ENSMUSG00000000411	non-Aire TRA	not_Aire_regulated	restricted
ENSMUSG00000000416	non-TRA	Aire_regulated	not_restricted
ENSMUSG00000000420	non-TRA	not_Aire_regulated	not_restricted
ENSMUSG00000000435	Aire-regulated TRA	Aire_regulated	restricted
ENSMUSG00000000439	non-TRA	not_Aire_regulated	not_restricted
ENSMUSG00000000440	non-TRA	not_Aire_regulated	not_restricted
ENSMUSG00000000441	non-TRA	not_Aire_regulated	not_restricted
ENSMUSG00000000486	non-TRA	not_Aire_regulated	not_restricted
ENSMUSG00000000489	non-TRA	not_Aire_regulated	not_restricted
ENSMUSG00000000530	non-TRA	Aire_regulated	not_restricted
ENSMUSG00000000531	non-TRA	not_Aire_regulated	not_restricted
ENSMUSG00000000532	non-TRA	Aire_regulated	not_restricted
ENSMUSG00000000538	non-TRA	not_Aire_regulated	not_restricted
ENSMUSG00000000544	non-Aire TRA	not_Aire_regulated	restricted
ENSMUSG00000000552	non-TRA	not_Aire_regulated	not_restricted
ENSMUSG00000000555	non-TRA	Aire_regulated	not_restricted
ENSMUSG00000000560	Aire-regulated TRA	Aire_regulated	restricted
ENSMUSG00000000561	non-TRA	not_Aire_regulated	not_restricted
ENSMUSG00000000562	non-Aire TRA	not_Aire_regulated	restricted
ENSMUSG00000000563	non-TRA	not_Aire_regulated	not_restricted
ENSMUSG00000000567	non-TRA	not_Aire_regulated	not_restricted
ENSMUSG00000000568	non-TRA	not_Aire_regulated	not_restricted
ENSMUSG00000000579	non-TRA	not_Aire_regulated	not_restricted
ENSMUSG00000000581	non-TRA	not_Aire_regulated	not_restricted
ENSMUSG00000000594	non-TRA	Aire_regulated	not_restricted
ENSMUSG00000000600	non-TRA	not_Aire_regulated	not_restricted
ENSMUSG00000000605	non-TRA	not_Aire_regulated	not_restricted
ENSMUSG00000000606	Aire-regulated TRA	Aire_regulated	restricted
ENSMUSG00000000617	Aire-regulated TRA	Aire_regulated	restricted
ENSMUSG00000000627	Aire-regulated TRA	Aire_regulated	restricted
ENSMUSG00000000628	non-TRA	not_Aire_regulated	not_restricted
ENSMUSG00000000631	non-TRA	not_Aire_regulated	not_restricted
ENSMUSG00000000632	non-Aire TRA	not_Aire_regulated	restricted
ENSMUSG00000000673	non-Aire TRA	not_Aire_regulated	restricted
ENSMUSG00000000682	non-TRA	not_Aire_regulated	not_restricted
ENSMUSG00000000686	non-TRA	not_Aire_regulated	not_restricted
ENSMUSG00000000690	non-TRA	Aire_regulated	not_restricted
ENSMUSG00000000693	non-TRA	not_Aire_regulated	not_restricted
ENSMUSG00000000701	Aire-regulated TRA	Aire_regulated	restricted
ENSMUSG00000000706	non-Aire TRA	not_Aire_regulated	restricted
ENSMUSG00000000708	non-TRA	not_Aire_regulated	not_restricted
ENSMUSG00000000711	non-TRA	not_Aire_regulated	not_restricted
ENSMUSG00000000724	Aire-regulated TRA	Aire_regulated	restricted
ENSMUSG00000000730	non-Aire TRA	not_Aire_regulated	restricted
ENSMUSG00000000731	non-Aire TRA	not_Aire_regulated	restricted
ENSMUSG00000000732	non-TRA	not_Aire_regulated	not_restricted
ENSMUSG00000000738	non-TRA	not_Aire_regulated	not_restricted
ENSMUSG00000000739	non-TRA	not_Aire_regulated	not_restricted
ENSMUSG00000000740	non-TRA	not_Aire_regulated	not_restricted
ENSMUSG00000000743	non-TRA	not_Aire_regulated	not_restricted
ENSMUSG00000000751	non-TRA	not_Aire_regulated	not_restricted
ENSMUSG00000000753	non-TRA	not_Aire_regulated	not_restricted
ENSMUSG00000000759	non-TRA	not_Aire_regulated	not_restricted
ENSMUSG00000000766	non-Aire TRA	not_Aire_regulated	restricted
ENSMUSG00000000776	non-TRA	not_Aire_regulated	not_restricted
ENSMUSG00000000782	non-TRA	not_Aire_regulated	not_restricted
ENSMUSG00000000787	non-TRA	not_Aire_regulated	not_restricted
ENSMUSG00000000791	non-Aire TRA	not_Aire_regulated	restricted
ENSMUSG00000000792	non-Aire TRA	not_Aire_regulated	restricted
ENSMUSG00000000794	non-TRA	not_Aire_regulated	not_restricted
ENSMUSG00000000804	non-TRA	not_Aire_regulated	not_restricted
ENSMUSG00000000805	non-TRA	Aire_regulated	not_restricted
ENSMUSG00000000811	non-TRA	not_Aire_regulated	not_restricted
ENSMUSG00000000817	Aire-regulated TRA	Aire_regulated	restricted
ENSMUSG00000000823	non-TRA	not_Aire_regulated	not_restricted
ENSMUSG00000000826	non-TRA	not_Aire_regulated	not_restricted
ENSMUSG00000000827	non-TRA	not_Aire_regulated	not_restricted
ENSMUSG00000000838	non-TRA	not_Aire_regulated	not_restricted
ENSMUSG00000000861	non-Aire TRA	not_Aire_regulated	restricted
ENSMUSG00000000869	non-Aire TRA	not_Aire_regulated	restricted
ENSMUSG00000000876	non-TRA	not_Aire_regulated	not_restricted
ENSMUSG00000000881	non-TRA	not_Aire_regulated	not_restricted
ENSMUSG00000000884	non-TRA	not_Aire_regulated	not_restricted
ENSMUSG00000000889	Aire-regulated TRA	Aire_regulated	restricted
ENSMUSG00000000901	non-TRA	not_Aire_regulated	not_restricted
ENSMUSG00000000902	non-TRA	not_Aire_regulated	not_restricted
ENSMUSG00000000903	Aire-regulated TRA	Aire_regulated	restricted
ENSMUSG00000000915	non-TRA	not_Aire_regulated	not_restricted
ENSMUSG00000000916	non-TRA	not_Aire_regulated	not_restricted
ENSMUSG00000000934	non-TRA	not_Aire_regulated	not_restricted
ENSMUSG00000000938	non-Aire TRA	not_Aire_regulated	restricted
ENSMUSG00000000942	non-Aire TRA	not_Aire_regulated	restricted
ENSMUSG00000000948	non-TRA	not_Aire_regulated	not_restricted
ENSMUSG00000000957	non-TRA	not_Aire_regulated	not_restricted
ENSMUSG00000000958	non-TRA	not_Aire_regulated	not_restricted
ENSMUSG00000000959	non-TRA	not_Aire_regulated	not_restricted
ENSMUSG00000000976	non-TRA	not_Aire_regulated	not_restricted
ENSMUSG00000000982	non-TRA	Aire_regulated	not_restricted
ENSMUSG00000000983	Aire-regulated TRA	Aire_regulated	restricted
ENSMUSG00000001014	non-TRA	not_Aire_regulated	not_restricted
ENSMUSG00000001016	non-TRA	not_Aire_regulated	not_restricted
ENSMUSG00000001017	non-TRA	not_Aire_regulated	not_restricted
ENSMUSG00000001018	non-TRA	not_Aire_regulated	not_restricted
ENSMUSG00000001020	non-TRA	not_Aire_regulated	not_restricted
ENSMUSG00000001021	non-Aire TRA	not_Aire_regulated	restricted
ENSMUSG00000001023	non-Aire TRA	not_Aire_regulated	restricted
ENSMUSG00000001025	non-TRA	not_Aire_regulated	not_restricted
ENSMUSG00000001027	non-Aire TRA	not_Aire_regulated	restricted
ENSMUSG00000001029	non-TRA	Aire_regulated	not_restricted
ENSMUSG00000001034	non-TRA	not_Aire_regulated	not_restricted
ENSMUSG00000001036	non-TRA	not_Aire_regulated	not_restricted
ENSMUSG00000001039	non-TRA	not_Aire_regulated	not_restricted
ENSMUSG00000001052	non-TRA	not_Aire_regulated	not_restricted
ENSMUSG00000001053	non-TRA	not_Aire_regulated	not_restricted
ENSMUSG00000001054	non-TRA	not_Aire_regulated	not_restricted
ENSMUSG00000001056	non-TRA	not_Aire_regulated	not_restricted
ENSMUSG00000001062	non-TRA	not_Aire_regulated	not_restricted
ENSMUSG00000001065	non-TRA	not_Aire_regulated	not_restricted
ENSMUSG00000001076	non-Aire TRA	not_Aire_regulated	restricted
ENSMUSG00000001082	non-TRA	not_Aire_regulated	not_restricted
ENSMUSG00000001089	non-TRA	not_Aire_regulated	not_restricted
ENSMUSG00000001095	non-Aire TRA	not_Aire_regulated	restricted
ENSMUSG00000001098	non-TRA	not_Aire_regulated	not_restricted
ENSMUSG00000001100	non-TRA	not_Aire_regulated	not_restricted
ENSMUSG00000001103	Aire-regulated TRA	Aire_regulated	restricted
ENSMUSG00000001105	non-TRA	not_Aire_regulated	not_restricted
ENSMUSG00000001119	non-TRA	Aire_regulated	not_restricted
ENSMUSG00000001120	non-TRA	not_Aire_regulated	not_restricted
ENSMUSG00000001123	non-TRA	not_Aire_regulated	not_restricted
ENSMUSG00000001127	non-TRA	not_Aire_regulated	not_restricted
ENSMUSG00000001128	non-TRA	Aire_regulated	not_restricted
ENSMUSG00000001131	non-TRA	not_Aire_regulated	not_restricted
ENSMUSG00000001134	non-TRA	not_Aire_regulated	not_restricted
ENSMUSG00000001138	non-TRA	not_Aire_regulated	not_restricted
ENSMUSG00000001143	non-TRA	not_Aire_regulated	not_restricted
ENSMUSG00000001150	non-TRA	not_Aire_regulated	not_restricted
ENSMUSG00000001151	non-TRA	not_Aire_regulated	not_restricted
ENSMUSG00000001155	Aire-regulated TRA	Aire_regulated	restricted
ENSMUSG00000001156	non-TRA	not_Aire_regulated	not_restricted
ENSMUSG00000001157	non-TRA	not_Aire_regulated	not_restricted
ENSMUSG00000001158	non-TRA	not_Aire_regulated	not_restricted
ENSMUSG00000001166	non-TRA	Aire_regulated	not_restricted
ENSMUSG00000001168	Aire-regulated TRA	Aire_regulated	restricted
ENSMUSG00000001173	non-TRA	not_Aire_regulated	not_restricted
ENSMUSG00000001175	non-TRA	not_Aire_regulated	not_restricted
ENSMUSG00000001211	non-TRA	not_Aire_regulated	not_restricted
ENSMUSG00000001225	Aire-regulated TRA	Aire_regulated	restricted
ENSMUSG00000001227	non-TRA	not_Aire_regulated	not_restricted
ENSMUSG00000001228	non-TRA	not_Aire_regulated	not_restricted
ENSMUSG00000001229	non-TRA	not_Aire_regulated	not_restricted
ENSMUSG00000001240	non-TRA	Aire_regulated	not_restricted
ENSMUSG00000001247	non-TRA	not_Aire_regulated	not_restricted
ENSMUSG00000001248	non-TRA	not_Aire_regulated	not_restricted
ENSMUSG00000001249	non-TRA	not_Aire_regulated	not_restricted
ENSMUSG00000001260	non-Aire TRA	not_Aire_regulated	restricted
ENSMUSG00000001270	non-TRA	not_Aire_regulated	not_restricted
ENSMUSG00000001280	non-TRA	not_Aire_regulated	not_restricted
ENSMUSG00000001281	non-Aire TRA	not_Aire_regulated	restricted
ENSMUSG00000001285	non-TRA	not_Aire_regulated	not_restricted
ENSMUSG00000001288	non-TRA	not_Aire_regulated	not_restricted
ENSMUSG00000001289	non-TRA	not_Aire_regulated	not_restricted
ENSMUSG00000001300	non-TRA	not_Aire_regulated	not_restricted
ENSMUSG00000001305	non-TRA	not_Aire_regulated	not_restricted
ENSMUSG00000001313	non-TRA	not_Aire_regulated	not_restricted
ENSMUSG00000001323	non-TRA	not_Aire_regulated	not_restricted
ENSMUSG00000001333	non-Aire TRA	not_Aire_regulated	restricted
ENSMUSG00000001334	Aire-regulated TRA	Aire_regulated	restricted
ENSMUSG00000001348	non-TRA	Aire_regulated	not_restricted
ENSMUSG00000001349	non-TRA	Aire_regulated	not_restricted
ENSMUSG00000001366	non-TRA	not_Aire_regulated	not_restricted
ENSMUSG00000001376	non-TRA	not_Aire_regulated	not_restricted
ENSMUSG00000001380	non-TRA	not_Aire_regulated	not_restricted
ENSMUSG00000001383	non-TRA	not_Aire_regulated	not_restricted
ENSMUSG00000001403	non-TRA	not_Aire_regulated	not_restricted
ENSMUSG00000001415	non-TRA	not_Aire_regulated	not_restricted
ENSMUSG00000001416	non-TRA	not_Aire_regulated	not_restricted
ENSMUSG00000001418	non-TRA	not_Aire_regulated	not_restricted
ENSMUSG00000001419	non-TRA	not_Aire_regulated	not_restricted
ENSMUSG00000001420	non-TRA	not_Aire_regulated	not_restricted
ENSMUSG00000001424	non-TRA	not_Aire_regulated	not_restricted
ENSMUSG00000001435	non-TRA	Aire_regulated	not_restricted
ENSMUSG00000001436	non-TRA	Aire_regulated	not_restricted
ENSMUSG00000001440	non-TRA	not_Aire_regulated	not_restricted
ENSMUSG00000001441	non-TRA	not_Aire_regulated	not_restricted
ENSMUSG00000001444	non-Aire TRA	not_Aire_regulated	restricted
ENSMUSG00000001445	non-TRA	not_Aire_regulated	not_restricted
ENSMUSG00000001467	non-TRA	not_Aire_regulated	not_restricted
ENSMUSG00000001472	non-TRA	not_Aire_regulated	not_restricted
ENSMUSG00000001473	non-TRA	not_Aire_regulated	not_restricted
ENSMUSG00000001482	non-TRA	not_Aire_regulated	not_restricted
ENSMUSG00000001493	non-Aire TRA	not_Aire_regulated	restricted
ENSMUSG00000001494	Aire-regulated TRA	Aire_regulated	restricted
ENSMUSG00000001496	non-Aire TRA	not_Aire_regulated	restricted
ENSMUSG00000001497	non-Aire TRA	not_Aire_regulated	restricted
ENSMUSG00000001504	non-TRA	Aire_regulated	not_restricted
ENSMUSG00000001506	non-TRA	Aire_regulated	not_restricted
ENSMUSG00000001507	non-TRA	not_Aire_regulated	not_restricted
ENSMUSG00000001508	non-Aire TRA	not_Aire_regulated	restricted
ENSMUSG00000001510	Aire-regulated TRA	Aire_regulated	restricted
ENSMUSG00000001517	non-TRA	not_Aire_regulated	not_restricted
ENSMUSG00000001518	non-TRA	not_Aire_regulated	not_restricted
ENSMUSG00000001520	Aire-regulated TRA	Aire_regulated	restricted
ENSMUSG00000001521	non-TRA	not_Aire_regulated	not_restricted
ENSMUSG00000001524	non-TRA	not_Aire_regulated	not_restricted
ENSMUSG00000001525	non-TRA	not_Aire_regulated	not_restricted
ENSMUSG00000001542	non-TRA	not_Aire_regulated	not_restricted
ENSMUSG00000001552	non-TRA	not_Aire_regulated	not_restricted
ENSMUSG00000001555	non-TRA	Aire_regulated	not_restricted
ENSMUSG00000001558	non-Aire TRA	not_Aire_regulated	restricted
ENSMUSG00000001566	Aire-regulated TRA	Aire_regulated	restricted
ENSMUSG00000001569	non-TRA	not_Aire_regulated	not_restricted
ENSMUSG00000001576	non-TRA	not_Aire_regulated	not_restricted
ENSMUSG00000001583	non-TRA	not_Aire_regulated	not_restricted
ENSMUSG00000001588	non-Aire TRA	not_Aire_regulated	restricted
ENSMUSG00000001604	non-TRA	Aire_regulated	not_restricted
ENSMUSG00000001622	non-Aire TRA	not_Aire_regulated	restricted
ENSMUSG00000001627	non-TRA	not_Aire_regulated	not_restricted
ENSMUSG00000001630	non-TRA	not_Aire_regulated	not_restricted
ENSMUSG00000001632	non-TRA	not_Aire_regulated	not_restricted
ENSMUSG00000001642	non-TRA	not_Aire_regulated	not_restricted
ENSMUSG00000001655	Aire-regulated TRA	Aire_regulated	restricted
ENSMUSG00000001656	Aire-regulated TRA	Aire_regulated	restricted
ENSMUSG00000001657	non-TRA	Aire_regulated	not_restricted
ENSMUSG00000001661	non-TRA	not_Aire_regulated	not_restricted
ENSMUSG00000001663	non-TRA	Aire_regulated	not_restricted
ENSMUSG00000001665	non-TRA	not_Aire_regulated	not_restricted
ENSMUSG00000001666	non-TRA	not_Aire_regulated	not_restricted
ENSMUSG00000001670	Aire-regulated TRA	Aire_regulated	restricted
ENSMUSG00000001672	non-TRA	not_Aire_regulated	not_restricted
ENSMUSG00000001674	non-TRA	not_Aire_regulated	not_restricted
ENSMUSG00000001687	non-TRA	not_Aire_regulated	not_restricted
ENSMUSG00000001700	non-TRA	not_Aire_regulated	not_restricted
ENSMUSG00000001707	non-TRA	not_Aire_regulated	not_restricted
ENSMUSG00000001729	non-TRA	not_Aire_regulated	not_restricted
ENSMUSG00000001739	non-TRA	Aire_regulated	not_restricted
ENSMUSG00000001741	non-TRA	not_Aire_regulated	not_restricted
ENSMUSG00000001750	non-TRA	not_Aire_regulated	not_restricted
ENSMUSG00000001751	non-TRA	not_Aire_regulated	not_restricted
ENSMUSG00000001755	non-TRA	not_Aire_regulated	not_restricted
ENSMUSG00000001761	non-TRA	not_Aire_regulated	not_restricted
ENSMUSG00000001763	non-TRA	not_Aire_regulated	not_restricted
ENSMUSG00000001767	non-TRA	not_Aire_regulated	not_restricted
ENSMUSG00000001768	non-TRA	not_Aire_regulated	not_restricted
ENSMUSG00000001773	Aire-regulated TRA	Aire_regulated	restricted
ENSMUSG00000001774	non-TRA	not_Aire_regulated	not_restricted
ENSMUSG00000001783	non-TRA	not_Aire_regulated	not_restricted
ENSMUSG00000001785	non-TRA	not_Aire_regulated	not_restricted
ENSMUSG00000001786	non-TRA	not_Aire_regulated	not_restricted
ENSMUSG00000001794	non-TRA	not_Aire_regulated	not_restricted
ENSMUSG00000001802	non-TRA	Aire_regulated	not_restricted
ENSMUSG00000001804	non-Aire TRA	not_Aire_regulated	restricted
ENSMUSG00000001815	Aire-regulated TRA	Aire_regulated	restricted
ENSMUSG00000001819	Aire-regulated TRA	Aire_regulated	restricted
ENSMUSG00000001823	non-Aire TRA	not_Aire_regulated	restricted
ENSMUSG00000001827	Aire-regulated TRA	Aire_regulated	restricted
ENSMUSG00000001829	non-TRA	not_Aire_regulated	not_restricted
ENSMUSG00000001833	non-TRA	not_Aire_regulated	not_restricted
ENSMUSG00000001844	non-TRA	not_Aire_regulated	not_restricted
ENSMUSG00000001847	non-TRA	not_Aire_regulated	not_restricted
ENSMUSG00000001855	non-TRA	not_Aire_regulated	not_restricted
ENSMUSG00000001864	non-TRA	not_Aire_regulated	not_restricted
ENSMUSG00000001865	non-Aire TRA	not_Aire_regulated	restricted
ENSMUSG00000001870	non-TRA	Aire_regulated	not_restricted
ENSMUSG00000001891	non-TRA	not_Aire_regulated	not_restricted
ENSMUSG00000001901	non-Aire TRA	not_Aire_regulated	restricted
ENSMUSG00000001909	non-TRA	not_Aire_regulated	not_restricted
ENSMUSG00000001910	non-TRA	not_Aire_regulated	not_restricted
ENSMUSG00000001911	non-TRA	not_Aire_regulated	not_restricted
ENSMUSG00000001918	non-TRA	not_Aire_regulated	not_restricted
ENSMUSG00000001924	non-TRA	not_Aire_regulated	not_restricted
ENSMUSG00000001930	non-TRA	not_Aire_regulated	not_restricted
ENSMUSG00000001942	non-TRA	not_Aire_regulated	not_restricted
ENSMUSG00000001943	non-TRA	not_Aire_regulated	not_restricted
ENSMUSG00000001946	non-TRA	not_Aire_regulated	not_restricted
ENSMUSG00000001948	non-Aire TRA	not_Aire_regulated	restricted
ENSMUSG00000001962	non-TRA	not_Aire_regulated	not_restricted
ENSMUSG00000001964	non-TRA	not_Aire_regulated	not_restricted
ENSMUSG00000001983	non-TRA	not_Aire_regulated	not_restricted
ENSMUSG00000001985	Aire-regulated TRA	Aire_regulated	restricted
ENSMUSG00000001986	non-TRA	not_Aire_regulated	not_restricted
ENSMUSG00000001988	Aire-regulated TRA	Aire_regulated	restricted
ENSMUSG00000001995	non-TRA	not_Aire_regulated	not_restricted
ENSMUSG00000001998	non-TRA	not_Aire_regulated	not_restricted
ENSMUSG00000001999	non-TRA	not_Aire_regulated	not_restricted
ENSMUSG00000002006	Aire-regulated TRA	Aire_regulated	restricted
ENSMUSG00000002007	non-TRA	not_Aire_regulated	not_restricted
ENSMUSG00000002010	non-TRA	not_Aire_regulated	not_restricted
ENSMUSG00000002012	non-TRA	not_Aire_regulated	not_restricted
ENSMUSG00000002014	non-TRA	not_Aire_regulated	not_restricted
ENSMUSG00000002015	non-TRA	not_Aire_regulated	not_restricted
ENSMUSG00000002017	non-TRA	not_Aire_regulated	not_restricted
ENSMUSG00000002020	non-TRA	not_Aire_regulated	not_restricted
ENSMUSG00000002028	non-TRA	not_Aire_regulated	not_restricted
ENSMUSG00000002031	non-TRA	not_Aire_regulated	not_restricted
ENSMUSG00000002032	non-TRA	not_Aire_regulated	not_restricted
ENSMUSG00000002033	non-Aire TRA	not_Aire_regulated	restricted
ENSMUSG00000002043	non-TRA	not_Aire_regulated	not_restricted
ENSMUSG00000002052	non-TRA	not_Aire_regulated	not_restricted
ENSMUSG00000002055	non-TRA	not_Aire_regulated	not_restricted
ENSMUSG00000002057	non-Aire TRA	not_Aire_regulated	restricted
ENSMUSG00000002058	non-TRA	not_Aire_regulated	not_restricted
ENSMUSG00000002059	non-TRA	not_Aire_regulated	not_restricted
ENSMUSG00000002064	non-TRA	not_Aire_regulated	not_restricted
ENSMUSG00000002068	non-TRA	not_Aire_regulated	not_restricted
ENSMUSG00000002076	non-Aire TRA	not_Aire_regulated	restricted
ENSMUSG00000002083	non-TRA	not_Aire_regulated	not_restricted
ENSMUSG00000002100	Aire-regulated TRA	Aire_regulated	restricted
ENSMUSG00000002102	non-TRA	not_Aire_regulated	not_restricted
ENSMUSG00000002103	non-TRA	not_Aire_regulated	not_restricted
ENSMUSG00000002104	Aire-regulated TRA	Aire_regulated	restricted
ENSMUSG00000002105	non-TRA	not_Aire_regulated	not_restricted
ENSMUSG00000002107	non-TRA	not_Aire_regulated	not_restricted
ENSMUSG00000002108	non-TRA	Aire_regulated	not_restricted
ENSMUSG00000002109	non-TRA	not_Aire_regulated	not_restricted
ENSMUSG00000002111	non-TRA	Aire_regulated	not_restricted
ENSMUSG00000002129	non-TRA	not_Aire_regulated	not_restricted
ENSMUSG00000002147	non-TRA	not_Aire_regulated	not_restricted
ENSMUSG00000002190	Aire-regulated TRA	Aire_regulated	restricted
ENSMUSG00000002204	non-Aire TRA	not_Aire_regulated	restricted
ENSMUSG00000002205	non-TRA	not_Aire_regulated	not_restricted
ENSMUSG00000002210	non-TRA	not_Aire_regulated	not_restricted
ENSMUSG00000002221	non-TRA	not_Aire_regulated	not_restricted
ENSMUSG00000002222	non-TRA	not_Aire_regulated	not_restricted
ENSMUSG00000002227	non-TRA	not_Aire_regulated	not_restricted
ENSMUSG00000002228	non-TRA	Aire_regulated	not_restricted
ENSMUSG00000002233	non-TRA	not_Aire_regulated	not_restricted
ENSMUSG00000002240	non-Aire TRA	not_Aire_regulated	restricted
ENSMUSG00000002249	non-TRA	not_Aire_regulated	not_restricted
ENSMUSG00000002250	non-TRA	not_Aire_regulated	not_restricted
ENSMUSG00000002257	non-TRA	not_Aire_regulated	not_restricted
ENSMUSG00000002265	non-TRA	not_Aire_regulated	not_restricted
ENSMUSG00000002266	Aire-regulated TRA	Aire_regulated	restricted
ENSMUSG00000002274	non-TRA	not_Aire_regulated	not_restricted
ENSMUSG00000002279	non-TRA	not_Aire_regulated	not_restricted
ENSMUSG00000002280	non-TRA	not_Aire_regulated	not_restricted
ENSMUSG00000002289	non-TRA	Aire_regulated	not_restricted
ENSMUSG00000002297	non-TRA	not_Aire_regulated	not_restricted
ENSMUSG00000002307	non-TRA	not_Aire_regulated	not_restricted
ENSMUSG00000002308	non-TRA	not_Aire_regulated	not_restricted
ENSMUSG00000002319	non-TRA	not_Aire_regulated	not_restricted
ENSMUSG00000002320	non-TRA	not_Aire_regulated	not_restricted
ENSMUSG00000002324	non-TRA	not_Aire_regulated	not_restricted
ENSMUSG00000002325	non-TRA	not_Aire_regulated	not_restricted
ENSMUSG00000002326	non-TRA	not_Aire_regulated	not_restricted
ENSMUSG00000002329	non-TRA	not_Aire_regulated	not_restricted
ENSMUSG00000002332	non-TRA	not_Aire_regulated	not_restricted
ENSMUSG00000002341	Aire-regulated TRA	Aire_regulated	restricted
ENSMUSG00000002342	non-TRA	not_Aire_regulated	not_restricted
ENSMUSG00000002343	non-TRA	not_Aire_regulated	not_restricted
ENSMUSG00000002345	non-TRA	not_Aire_regulated	not_restricted
ENSMUSG00000002346	non-TRA	not_Aire_regulated	not_restricted
ENSMUSG00000002365	non-TRA	not_Aire_regulated	not_restricted
ENSMUSG00000002372	non-TRA	not_Aire_regulated	not_restricted
ENSMUSG00000002379	non-TRA	not_Aire_regulated	not_restricted
ENSMUSG00000002384	Aire-regulated TRA	Aire_regulated	restricted
ENSMUSG00000002393	non-TRA	not_Aire_regulated	not_restricted
ENSMUSG00000002395	non-TRA	not_Aire_regulated	not_restricted
ENSMUSG00000002396	non-TRA	not_Aire_regulated	not_restricted
ENSMUSG00000002409	non-TRA	not_Aire_regulated	not_restricted
ENSMUSG00000002413	non-TRA	not_Aire_regulated	not_restricted
ENSMUSG00000002416	non-TRA	not_Aire_regulated	not_restricted
ENSMUSG00000002428	non-TRA	not_Aire_regulated	not_restricted
ENSMUSG00000002455	non-TRA	not_Aire_regulated	not_restricted
ENSMUSG00000002458	non-TRA	not_Aire_regulated	not_restricted
ENSMUSG00000002459	non-Aire TRA	not_Aire_regulated	restricted
ENSMUSG00000002475	non-TRA	not_Aire_regulated	not_restricted
ENSMUSG00000002477	non-TRA	not_Aire_regulated	not_restricted
ENSMUSG00000002486	non-TRA	not_Aire_regulated	not_restricted
ENSMUSG00000002489	non-TRA	not_Aire_regulated	not_restricted
ENSMUSG00000002496	non-TRA	not_Aire_regulated	not_restricted
ENSMUSG00000002500	non-Aire TRA	not_Aire_regulated	restricted
ENSMUSG00000002504	non-TRA	not_Aire_regulated	not_restricted
ENSMUSG00000002524	non-TRA	not_Aire_regulated	not_restricted
ENSMUSG00000002546	non-TRA	not_Aire_regulated	not_restricted
ENSMUSG00000002550	non-TRA	not_Aire_regulated	not_restricted
ENSMUSG00000002565	non-Aire TRA	not_Aire_regulated	restricted
ENSMUSG00000002578	non-TRA	not_Aire_regulated	not_restricted
ENSMUSG00000002580	non-TRA	not_Aire_regulated	not_restricted
ENSMUSG00000002588	Aire-regulated TRA	Aire_regulated	restricted
ENSMUSG00000002602	non-TRA	not_Aire_regulated	not_restricted
ENSMUSG00000002603	non-TRA	not_Aire_regulated	not_restricted
ENSMUSG00000002608	non-TRA	not_Aire_regulated	not_restricted
ENSMUSG00000002617	non-TRA	not_Aire_regulated	not_restricted
ENSMUSG00000002625	non-TRA	not_Aire_regulated	not_restricted
ENSMUSG00000002633	Aire-regulated TRA	Aire_regulated	restricted
ENSMUSG00000002635	non-TRA	not_Aire_regulated	not_restricted
ENSMUSG00000002658	non-TRA	not_Aire_regulated	not_restricted
ENSMUSG00000002660	non-TRA	not_Aire_regulated	not_restricted
ENSMUSG00000002661	non-TRA	not_Aire_regulated	not_restricted
ENSMUSG00000002664	non-Aire TRA	not_Aire_regulated	restricted
ENSMUSG00000002668	non-Aire TRA	not_Aire_regulated	restricted
ENSMUSG00000002679	non-TRA	not_Aire_regulated	not_restricted
ENSMUSG00000002688	non-TRA	not_Aire_regulated	not_restricted
ENSMUSG00000002699	non-TRA	not_Aire_regulated	not_restricted
ENSMUSG00000002718	non-TRA	not_Aire_regulated	not_restricted
ENSMUSG00000002728	non-TRA	not_Aire_regulated	not_restricted
ENSMUSG00000002731	non-TRA	not_Aire_regulated	not_restricted
ENSMUSG00000002732	non-TRA	not_Aire_regulated	not_restricted
ENSMUSG00000002733	non-TRA	not_Aire_regulated	not_restricted
ENSMUSG00000002741	non-TRA	not_Aire_regulated	not_restricted
ENSMUSG00000002748	non-TRA	not_Aire_regulated	not_restricted
ENSMUSG00000002763	non-TRA	not_Aire_regulated	not_restricted
ENSMUSG00000002767	non-TRA	not_Aire_regulated	not_restricted
ENSMUSG00000002768	non-TRA	not_Aire_regulated	not_restricted
ENSMUSG00000002769	non-Aire TRA	not_Aire_regulated	restricted
ENSMUSG00000002771	non-Aire TRA	not_Aire_regulated	restricted
ENSMUSG00000002778	non-TRA	not_Aire_regulated	not_restricted
ENSMUSG00000002781	non-TRA	not_Aire_regulated	not_restricted
ENSMUSG00000002797	non-TRA	not_Aire_regulated	not_restricted
ENSMUSG00000002799	non-TRA	not_Aire_regulated	not_restricted
ENSMUSG00000002803	non-TRA	not_Aire_regulated	not_restricted
ENSMUSG00000002804	non-TRA	not_Aire_regulated	not_restricted
ENSMUSG00000002808	non-TRA	not_Aire_regulated	not_restricted
ENSMUSG00000002812	non-TRA	not_Aire_regulated	not_restricted
ENSMUSG00000002814	non-TRA	not_Aire_regulated	not_restricted
ENSMUSG00000002820	non-TRA	not_Aire_regulated	not_restricted
ENSMUSG00000002825	non-TRA	not_Aire_regulated	not_restricted
ENSMUSG00000002831	non-TRA	Aire_regulated	not_restricted
ENSMUSG00000002833	non-TRA	not_Aire_regulated	not_restricted
ENSMUSG00000002835	non-Aire TRA	not_Aire_regulated	restricted
ENSMUSG00000002844	non-TRA	not_Aire_regulated	not_restricted
ENSMUSG00000002845	non-TRA	not_Aire_regulated	not_restricted
ENSMUSG00000002846	non-TRA	not_Aire_regulated	not_restricted
ENSMUSG00000002847	non-TRA	not_Aire_regulated	not_restricted
ENSMUSG00000002870	non-TRA	not_Aire_regulated	not_restricted
ENSMUSG00000002871	non-TRA	not_Aire_regulated	not_restricted
ENSMUSG00000002881	non-TRA	not_Aire_regulated	not_restricted
ENSMUSG00000002885	non-TRA	not_Aire_regulated	not_restricted
ENSMUSG00000002897	non-TRA	not_Aire_regulated	not_restricted
ENSMUSG00000002900	non-TRA	not_Aire_regulated	not_restricted
ENSMUSG00000002908	non-TRA	Aire_regulated	not_restricted
ENSMUSG00000002910	non-TRA	not_Aire_regulated	not_restricted
ENSMUSG00000002930	Aire-regulated TRA	Aire_regulated	restricted
ENSMUSG00000002944	non-TRA	Aire_regulated	not_restricted
ENSMUSG00000002948	non-TRA	not_Aire_regulated	not_restricted
ENSMUSG00000002949	non-TRA	not_Aire_regulated	not_restricted
ENSMUSG00000002957	non-TRA	not_Aire_regulated	not_restricted
ENSMUSG00000002963	non-TRA	not_Aire_regulated	not_restricted
ENSMUSG00000002968	non-TRA	not_Aire_regulated	not_restricted
ENSMUSG00000002980	non-TRA	Aire_regulated	not_restricted
ENSMUSG00000002981	non-TRA	not_Aire_regulated	not_restricted
ENSMUSG00000002983	non-TRA	not_Aire_regulated	not_restricted
ENSMUSG00000002984	non-TRA	not_Aire_regulated	not_restricted
ENSMUSG00000002985	non-TRA	Aire_regulated	not_restricted
ENSMUSG00000002992	non-Aire TRA	not_Aire_regulated	restricted
ENSMUSG00000002996	non-TRA	not_Aire_regulated	not_restricted
ENSMUSG00000002997	non-TRA	Aire_regulated	not_restricted
ENSMUSG00000003031	non-TRA	not_Aire_regulated	not_restricted
ENSMUSG00000003032	non-TRA	not_Aire_regulated	not_restricted
ENSMUSG00000003033	non-TRA	not_Aire_regulated	not_restricted
ENSMUSG00000003037	non-TRA	not_Aire_regulated	not_restricted
ENSMUSG00000003038	non-TRA	not_Aire_regulated	not_restricted
ENSMUSG00000003039	non-TRA	not_Aire_regulated	not_restricted
ENSMUSG00000003051	non-TRA	not_Aire_regulated	not_restricted
ENSMUSG00000003053	Aire-regulated TRA	Aire_regulated	restricted
ENSMUSG00000003062	non-TRA	not_Aire_regulated	not_restricted
ENSMUSG00000003068	non-TRA	not_Aire_regulated	not_restricted
ENSMUSG00000003070	non-TRA	not_Aire_regulated	not_restricted
ENSMUSG00000003072	non-TRA	not_Aire_regulated	not_restricted
ENSMUSG00000003099	non-TRA	not_Aire_regulated	not_restricted
ENSMUSG00000003119	non-TRA	not_Aire_regulated	not_restricted
ENSMUSG00000003123	non-TRA	not_Aire_regulated	not_restricted
ENSMUSG00000003131	non-TRA	not_Aire_regulated	not_restricted
ENSMUSG00000003134	non-TRA	not_Aire_regulated	not_restricted
ENSMUSG00000003135	non-TRA	not_Aire_regulated	not_restricted
ENSMUSG00000003153	Aire-regulated TRA	Aire_regulated	restricted
ENSMUSG00000003154	non-TRA	not_Aire_regulated	not_restricted
ENSMUSG00000003161	non-TRA	not_Aire_regulated	not_restricted
ENSMUSG00000003166	non-TRA	not_Aire_regulated	not_restricted
ENSMUSG00000003184	non-TRA	not_Aire_regulated	not_restricted
ENSMUSG00000003190	non-TRA	not_Aire_regulated	not_restricted
ENSMUSG00000003198	non-TRA	not_Aire_regulated	not_restricted
ENSMUSG00000003199	non-TRA	not_Aire_regulated	not_restricted
ENSMUSG00000003200	non-TRA	not_Aire_regulated	not_restricted
ENSMUSG00000003206	non-Aire TRA	not_Aire_regulated	restricted
ENSMUSG00000003208	non-TRA	not_Aire_regulated	not_restricted
ENSMUSG00000003226	non-TRA	not_Aire_regulated	not_restricted
ENSMUSG00000003227	non-Aire TRA	not_Aire_regulated	restricted
ENSMUSG00000003228	non-TRA	not_Aire_regulated	not_restricted
ENSMUSG00000003233	non-TRA	not_Aire_regulated	not_restricted
ENSMUSG00000003234	non-TRA	not_Aire_regulated	not_restricted
ENSMUSG00000003235	non-TRA	not_Aire_regulated	not_restricted
ENSMUSG00000003269	non-TRA	not_Aire_regulated	not_restricted
ENSMUSG00000003271	non-Aire TRA	not_Aire_regulated	restricted
ENSMUSG00000003273	non-TRA	not_Aire_regulated	not_restricted
ENSMUSG00000003279	non-Aire TRA	not_Aire_regulated	restricted
ENSMUSG00000003282	non-Aire TRA	not_Aire_regulated	restricted
ENSMUSG00000003283	non-TRA	Aire_regulated	not_restricted
ENSMUSG00000003299	non-TRA	not_Aire_regulated	not_restricted
ENSMUSG00000003308	non-TRA	not_Aire_regulated	not_restricted
ENSMUSG00000003309	non-TRA	not_Aire_regulated	not_restricted
ENSMUSG00000003316	non-TRA	not_Aire_regulated	not_restricted
ENSMUSG00000003341	Aire-regulated TRA	Aire_regulated	restricted
ENSMUSG00000003344	non-TRA	not_Aire_regulated	not_restricted
ENSMUSG00000003345	non-TRA	not_Aire_regulated	not_restricted
ENSMUSG00000003346	non-TRA	not_Aire_regulated	not_restricted
ENSMUSG00000003348	non-TRA	not_Aire_regulated	not_restricted
ENSMUSG00000003352	non-TRA	not_Aire_regulated	not_restricted
ENSMUSG00000003354	Aire-regulated TRA	Aire_regulated	restricted
ENSMUSG00000003355	non-TRA	Aire_regulated	not_restricted
ENSMUSG00000003360	non-TRA	not_Aire_regulated	not_restricted
ENSMUSG00000003363	non-TRA	not_Aire_regulated	not_restricted
ENSMUSG00000003378	non-TRA	not_Aire_regulated	not_restricted
ENSMUSG00000003379	Aire-regulated TRA	Aire_regulated	restricted
ENSMUSG00000003380	non-TRA	not_Aire_regulated	not_restricted
ENSMUSG00000003382	non-TRA	not_Aire_regulated	not_restricted
ENSMUSG00000003402	non-TRA	not_Aire_regulated	not_restricted
ENSMUSG00000003410	Aire-regulated TRA	Aire_regulated	restricted
ENSMUSG00000003411	non-TRA	Aire_regulated	not_restricted
ENSMUSG00000003418	non-TRA	Aire_regulated	not_restricted
ENSMUSG00000003420	non-TRA	not_Aire_regulated	not_restricted
ENSMUSG00000003421	non-TRA	not_Aire_regulated	not_restricted
ENSMUSG00000003423	non-TRA	not_Aire_regulated	not_restricted
ENSMUSG00000003429	non-TRA	not_Aire_regulated	not_restricted
ENSMUSG00000003435	non-TRA	not_Aire_regulated	not_restricted
ENSMUSG00000003436	non-Aire TRA	not_Aire_regulated	restricted
ENSMUSG00000003437	non-TRA	not_Aire_regulated	not_restricted
ENSMUSG00000003438	non-TRA	not_Aire_regulated	not_restricted
ENSMUSG00000003444	non-TRA	not_Aire_regulated	not_restricted
ENSMUSG00000003452	non-Aire TRA	not_Aire_regulated	restricted
ENSMUSG00000003458	non-TRA	not_Aire_regulated	not_restricted
ENSMUSG00000003464	non-TRA	not_Aire_regulated	not_restricted
ENSMUSG00000003469	Aire-regulated TRA	Aire_regulated	restricted
ENSMUSG00000003476	Aire-regulated TRA	Aire_regulated	restricted
ENSMUSG00000003477	non-TRA	Aire_regulated	not_restricted
ENSMUSG00000003484	non-TRA	Aire_regulated	not_restricted
ENSMUSG00000003500	non-TRA	not_Aire_regulated	not_restricted
ENSMUSG00000003505	Aire-regulated TRA	Aire_regulated	restricted
ENSMUSG00000003518	non-TRA	not_Aire_regulated	not_restricted
ENSMUSG00000003526	non-TRA	not_Aire_regulated	not_restricted
ENSMUSG00000003527	non-TRA	not_Aire_regulated	not_restricted
ENSMUSG00000003528	non-TRA	not_Aire_regulated	not_restricted
ENSMUSG00000003531	non-TRA	not_Aire_regulated	not_restricted
ENSMUSG00000003534	non-TRA	not_Aire_regulated	not_restricted
ENSMUSG00000003541	non-TRA	not_Aire_regulated	not_restricted
ENSMUSG00000003545	non-Aire TRA	not_Aire_regulated	restricted
ENSMUSG00000003546	non-TRA	not_Aire_regulated	not_restricted
ENSMUSG00000003549	non-TRA	not_Aire_regulated	not_restricted
ENSMUSG00000003555	non-Aire TRA	not_Aire_regulated	restricted
ENSMUSG00000003559	non-TRA	not_Aire_regulated	not_restricted
ENSMUSG00000003573	non-TRA	not_Aire_regulated	not_restricted
ENSMUSG00000003575	non-TRA	not_Aire_regulated	not_restricted
ENSMUSG00000003581	non-TRA	not_Aire_regulated	not_restricted
ENSMUSG00000003585	non-Aire TRA	not_Aire_regulated	restricted
ENSMUSG00000003604	non-TRA	not_Aire_regulated	not_restricted
ENSMUSG00000003617	non-TRA	not_Aire_regulated	not_restricted
ENSMUSG00000003623	non-TRA	not_Aire_regulated	not_restricted
ENSMUSG00000003644	non-TRA	not_Aire_regulated	not_restricted
ENSMUSG00000003657	Aire-regulated TRA	Aire_regulated	restricted
ENSMUSG00000003660	non-TRA	not_Aire_regulated	not_restricted
ENSMUSG00000003662	non-TRA	not_Aire_regulated	not_restricted
ENSMUSG00000003665	Aire-regulated TRA	Aire_regulated	restricted
ENSMUSG00000003680	non-TRA	not_Aire_regulated	not_restricted
ENSMUSG00000003721	non-TRA	not_Aire_regulated	not_restricted
ENSMUSG00000003731	non-TRA	not_Aire_regulated	not_restricted
ENSMUSG00000003746	non-TRA	not_Aire_regulated	not_restricted
ENSMUSG00000003752	non-TRA	not_Aire_regulated	not_restricted
ENSMUSG00000003762	non-TRA	not_Aire_regulated	not_restricted
ENSMUSG00000003778	non-TRA	not_Aire_regulated	not_restricted
ENSMUSG00000003779	non-TRA	not_Aire_regulated	not_restricted
ENSMUSG00000003808	non-TRA	not_Aire_regulated	not_restricted
ENSMUSG00000003809	non-TRA	not_Aire_regulated	not_restricted
ENSMUSG00000003810	non-TRA	not_Aire_regulated	not_restricted
ENSMUSG00000003812	non-TRA	not_Aire_regulated	not_restricted
ENSMUSG00000003813	non-TRA	not_Aire_regulated	not_restricted
ENSMUSG00000003814	non-TRA	not_Aire_regulated	not_restricted
ENSMUSG00000003824	non-Aire TRA	not_Aire_regulated	restricted
ENSMUSG00000003847	non-TRA	not_Aire_regulated	not_restricted
ENSMUSG00000003848	non-TRA	not_Aire_regulated	not_restricted
ENSMUSG00000003849	non-TRA	not_Aire_regulated	not_restricted
ENSMUSG00000003863	non-TRA	not_Aire_regulated	not_restricted
ENSMUSG00000003865	non-TRA	not_Aire_regulated	not_restricted
ENSMUSG00000003868	non-TRA	not_Aire_regulated	not_restricted
ENSMUSG00000003872	non-TRA	not_Aire_regulated	not_restricted
ENSMUSG00000003873	non-TRA	not_Aire_regulated	not_restricted
ENSMUSG00000003882	non-Aire TRA	not_Aire_regulated	restricted
ENSMUSG00000003923	non-TRA	not_Aire_regulated	not_restricted
ENSMUSG00000003929	non-TRA	not_Aire_regulated	not_restricted
ENSMUSG00000003934	Aire-regulated TRA	Aire_regulated	restricted
ENSMUSG00000003948	non-TRA	not_Aire_regulated	not_restricted
ENSMUSG00000003949	non-TRA	not_Aire_regulated	not_restricted
ENSMUSG00000003955	non-TRA	not_Aire_regulated	not_restricted
ENSMUSG00000003970	non-TRA	not_Aire_regulated	not_restricted
ENSMUSG00000003974	Aire-regulated TRA	Aire_regulated	restricted
ENSMUSG00000003992	non-TRA	not_Aire_regulated	not_restricted
ENSMUSG00000004018	non-TRA	not_Aire_regulated	not_restricted
ENSMUSG00000004031	non-Aire TRA	not_Aire_regulated	restricted
ENSMUSG00000004032	non-TRA	Aire_regulated	not_restricted
ENSMUSG00000004035	non-TRA	Aire_regulated	not_restricted
ENSMUSG00000004038	Aire-regulated TRA	Aire_regulated	restricted
ENSMUSG00000004040	non-TRA	not_Aire_regulated	not_restricted
ENSMUSG00000004043	non-TRA	not_Aire_regulated	not_restricted
ENSMUSG00000004044	non-TRA	not_Aire_regulated	not_restricted
ENSMUSG00000004054	non-TRA	not_Aire_regulated	not_restricted
ENSMUSG00000004056	non-TRA	not_Aire_regulated	not_restricted
ENSMUSG00000004069	non-TRA	not_Aire_regulated	not_restricted
ENSMUSG00000004070	non-TRA	not_Aire_regulated	not_restricted
ENSMUSG00000004071	non-TRA	not_Aire_regulated	not_restricted
ENSMUSG00000004085	non-TRA	not_Aire_regulated	not_restricted
ENSMUSG00000004096	non-TRA	not_Aire_regulated	not_restricted
ENSMUSG00000004098	non-TRA	Aire_regulated	not_restricted
ENSMUSG00000004099	non-TRA	not_Aire_regulated	not_restricted
ENSMUSG00000004100	non-TRA	not_Aire_regulated	not_restricted
ENSMUSG00000004105	non-TRA	not_Aire_regulated	not_restricted
ENSMUSG00000004110	non-Aire TRA	not_Aire_regulated	restricted
ENSMUSG00000004113	non-Aire TRA	not_Aire_regulated	restricted
ENSMUSG00000004127	non-TRA	not_Aire_regulated	not_restricted
ENSMUSG00000004151	non-TRA	not_Aire_regulated	not_restricted
ENSMUSG00000004187	non-TRA	not_Aire_regulated	not_restricted
ENSMUSG00000004207	non-TRA	not_Aire_regulated	not_restricted
ENSMUSG00000004221	non-TRA	not_Aire_regulated	not_restricted
ENSMUSG00000004231	Aire-regulated TRA	Aire_regulated	restricted
ENSMUSG00000004233	non-TRA	not_Aire_regulated	not_restricted
ENSMUSG00000004263	non-TRA	not_Aire_regulated	not_restricted
ENSMUSG00000004264	non-TRA	not_Aire_regulated	not_restricted
ENSMUSG00000004266	non-TRA	not_Aire_regulated	not_restricted
ENSMUSG00000004267	non-Aire TRA	not_Aire_regulated	restricted
ENSMUSG00000004268	non-TRA	not_Aire_regulated	not_restricted
ENSMUSG00000004270	non-TRA	not_Aire_regulated	not_restricted
ENSMUSG00000004285	non-TRA	not_Aire_regulated	not_restricted
ENSMUSG00000004296	Aire-regulated TRA	Aire_regulated	restricted
ENSMUSG00000004317	non-TRA	not_Aire_regulated	not_restricted
ENSMUSG00000004319	non-TRA	not_Aire_regulated	not_restricted
ENSMUSG00000004328	non-TRA	not_Aire_regulated	not_restricted
ENSMUSG00000004341	Aire-regulated TRA	Aire_regulated	restricted
ENSMUSG00000004344	Aire-regulated TRA	Aire_regulated	restricted
ENSMUSG00000004347	non-Aire TRA	not_Aire_regulated	restricted
ENSMUSG00000004356	non-TRA	not_Aire_regulated	not_restricted
ENSMUSG00000004359	non-Aire TRA	not_Aire_regulated	restricted
ENSMUSG00000004360	Aire-regulated TRA	Aire_regulated	restricted
ENSMUSG00000004364	non-TRA	not_Aire_regulated	not_restricted
ENSMUSG00000004366	Aire-regulated TRA	Aire_regulated	restricted
ENSMUSG00000004371	non-Aire TRA	not_Aire_regulated	restricted
ENSMUSG00000004383	non-TRA	not_Aire_regulated	not_restricted
ENSMUSG00000004393	non-TRA	not_Aire_regulated	not_restricted
ENSMUSG00000004394	non-TRA	not_Aire_regulated	not_restricted
ENSMUSG00000004415	Aire-regulated TRA	Aire_regulated	restricted
ENSMUSG00000004446	non-TRA	not_Aire_regulated	not_restricted
ENSMUSG00000004451	non-TRA	not_Aire_regulated	not_restricted
ENSMUSG00000004455	non-TRA	not_Aire_regulated	not_restricted
ENSMUSG00000004460	non-TRA	not_Aire_regulated	not_restricted
ENSMUSG00000004462	non-TRA	not_Aire_regulated	not_restricted
ENSMUSG00000004473	non-TRA	not_Aire_regulated	not_restricted
ENSMUSG00000004500	non-TRA	not_Aire_regulated	not_restricted
ENSMUSG00000004508	non-TRA	not_Aire_regulated	not_restricted
ENSMUSG00000004530	non-TRA	not_Aire_regulated	not_restricted
ENSMUSG00000004535	non-TRA	not_Aire_regulated	not_restricted
ENSMUSG00000004540	Aire-regulated TRA	Aire_regulated	restricted
ENSMUSG00000004542	Aire-regulated TRA	Aire_regulated	restricted
ENSMUSG00000004552	non-TRA	not_Aire_regulated	not_restricted
ENSMUSG00000004558	non-TRA	not_Aire_regulated	not_restricted
ENSMUSG00000004561	non-TRA	not_Aire_regulated	not_restricted
ENSMUSG00000004562	non-TRA	not_Aire_regulated	not_restricted
ENSMUSG00000004565	non-TRA	not_Aire_regulated	not_restricted
ENSMUSG00000004567	non-TRA	not_Aire_regulated	not_restricted
ENSMUSG00000004568	non-TRA	not_Aire_regulated	not_restricted
ENSMUSG00000004591	non-TRA	not_Aire_regulated	not_restricted
ENSMUSG00000004609	non-TRA	Aire_regulated	not_restricted
ENSMUSG00000004610	non-TRA	not_Aire_regulated	not_restricted
ENSMUSG00000004612	non-TRA	Aire_regulated	not_restricted
ENSMUSG00000004626	non-TRA	not_Aire_regulated	not_restricted
ENSMUSG00000004630	Aire-regulated TRA	Aire_regulated	restricted
ENSMUSG00000004631	non-TRA	not_Aire_regulated	not_restricted
ENSMUSG00000004633	non-TRA	Aire_regulated	not_restricted
ENSMUSG00000004637	non-TRA	not_Aire_regulated	not_restricted
ENSMUSG00000004642	non-TRA	not_Aire_regulated	not_restricted
ENSMUSG00000004651	non-TRA	Aire_regulated	not_restricted
ENSMUSG00000004654	Aire-regulated TRA	Aire_regulated	restricted
ENSMUSG00000004655	non-TRA	Aire_regulated	not_restricted
ENSMUSG00000004661	non-TRA	not_Aire_regulated	not_restricted
ENSMUSG00000004665	non-TRA	not_Aire_regulated	not_restricted
ENSMUSG00000004667	non-TRA	not_Aire_regulated	not_restricted
ENSMUSG00000004668	Aire-regulated TRA	Aire_regulated	restricted
ENSMUSG00000004677	non-TRA	not_Aire_regulated	not_restricted
ENSMUSG00000004698	non-TRA	not_Aire_regulated	not_restricted
ENSMUSG00000004707	non-Aire TRA	not_Aire_regulated	restricted
ENSMUSG00000004709	non-Aire TRA	not_Aire_regulated	restricted
ENSMUSG00000004730	non-TRA	Aire_regulated	not_restricted
ENSMUSG00000004748	non-TRA	not_Aire_regulated	not_restricted
ENSMUSG00000004768	non-TRA	not_Aire_regulated	not_restricted
ENSMUSG00000004771	non-TRA	not_Aire_regulated	not_restricted
ENSMUSG00000004788	non-TRA	not_Aire_regulated	not_restricted
ENSMUSG00000004789	non-TRA	not_Aire_regulated	not_restricted
ENSMUSG00000004791	non-TRA	Aire_regulated	not_restricted
ENSMUSG00000004798	non-TRA	not_Aire_regulated	not_restricted
ENSMUSG00000004814	non-TRA	Aire_regulated	not_restricted
ENSMUSG00000004815	non-TRA	not_Aire_regulated	not_restricted
ENSMUSG00000004821	non-Aire TRA	not_Aire_regulated	restricted
ENSMUSG00000004837	non-TRA	not_Aire_regulated	not_restricted
ENSMUSG00000004842	Aire-regulated TRA	Aire_regulated	restricted
ENSMUSG00000004843	non-TRA	not_Aire_regulated	not_restricted
ENSMUSG00000004846	non-TRA	not_Aire_regulated	not_restricted
ENSMUSG00000004849	non-TRA	not_Aire_regulated	not_restricted
ENSMUSG00000004864	non-TRA	not_Aire_regulated	not_restricted
ENSMUSG00000004865	non-TRA	not_Aire_regulated	not_restricted
ENSMUSG00000004872	Aire-regulated TRA	Aire_regulated	restricted
ENSMUSG00000004880	non-TRA	not_Aire_regulated	not_restricted
ENSMUSG00000004885	Aire-regulated TRA	Aire_regulated	restricted
ENSMUSG00000004891	non-TRA	Aire_regulated	not_restricted
ENSMUSG00000004892	Aire-regulated TRA	Aire_regulated	restricted
ENSMUSG00000004894	Aire-regulated TRA	Aire_regulated	restricted
ENSMUSG00000004895	non-TRA	not_Aire_regulated	not_restricted
ENSMUSG00000004896	non-TRA	not_Aire_regulated	not_restricted
ENSMUSG00000004897	non-TRA	not_Aire_regulated	not_restricted
ENSMUSG00000004902	Aire-regulated TRA	Aire_regulated	restricted
ENSMUSG00000004929	non-TRA	not_Aire_regulated	not_restricted
ENSMUSG00000004931	non-TRA	not_Aire_regulated	not_restricted
ENSMUSG00000004933	non-Aire TRA	not_Aire_regulated	restricted
ENSMUSG00000004934	non-TRA	not_Aire_regulated	not_restricted
ENSMUSG00000004936	non-TRA	not_Aire_regulated	not_restricted
ENSMUSG00000004937	non-TRA	not_Aire_regulated	not_restricted
ENSMUSG00000004939	non-Aire TRA	not_Aire_regulated	restricted
ENSMUSG00000004945	non-TRA	not_Aire_regulated	not_restricted
ENSMUSG00000004947	non-TRA	not_Aire_regulated	not_restricted
ENSMUSG00000004948	Aire-regulated TRA	Aire_regulated	restricted
ENSMUSG00000004951	non-TRA	Aire_regulated	not_restricted
ENSMUSG00000004952	non-TRA	not_Aire_regulated	not_restricted
ENSMUSG00000004961	non-TRA	not_Aire_regulated	not_restricted
ENSMUSG00000004980	non-TRA	not_Aire_regulated	not_restricted
ENSMUSG00000004988	Aire-regulated TRA	Aire_regulated	restricted
ENSMUSG00000004994	non-TRA	not_Aire_regulated	not_restricted
ENSMUSG00000004996	non-TRA	not_Aire_regulated	not_restricted
ENSMUSG00000005034	non-TRA	not_Aire_regulated	not_restricted
ENSMUSG00000005043	non-TRA	not_Aire_regulated	not_restricted
ENSMUSG00000005045	Aire-regulated TRA	Aire_regulated	restricted
ENSMUSG00000005054	non-TRA	not_Aire_regulated	not_restricted
ENSMUSG00000005057	non-TRA	not_Aire_regulated	not_restricted
ENSMUSG00000005069	non-TRA	not_Aire_regulated	not_restricted
ENSMUSG00000005078	non-TRA	not_Aire_regulated	not_restricted
ENSMUSG00000005087	non-TRA	not_Aire_regulated	not_restricted
ENSMUSG00000005089	non-Aire TRA	not_Aire_regulated	restricted
ENSMUSG00000005102	non-TRA	not_Aire_regulated	not_restricted
ENSMUSG00000005103	non-TRA	not_Aire_regulated	not_restricted
ENSMUSG00000005107	non-TRA	not_Aire_regulated	not_restricted
ENSMUSG00000005124	non-TRA	not_Aire_regulated	not_restricted
ENSMUSG00000005125	non-TRA	not_Aire_regulated	not_restricted
ENSMUSG00000005131	non-Aire TRA	not_Aire_regulated	restricted
ENSMUSG00000005142	non-TRA	not_Aire_regulated	not_restricted
ENSMUSG00000005148	non-TRA	Aire_regulated	not_restricted
ENSMUSG00000005150	non-TRA	not_Aire_regulated	not_restricted
ENSMUSG00000005161	non-TRA	not_Aire_regulated	not_restricted
ENSMUSG00000005198	non-TRA	not_Aire_regulated	not_restricted
ENSMUSG00000005202	non-TRA	Aire_regulated	not_restricted
ENSMUSG00000005204	non-TRA	not_Aire_regulated	not_restricted
ENSMUSG00000005220	non-Aire TRA	not_Aire_regulated	restricted
ENSMUSG00000005225	non-TRA	not_Aire_regulated	not_restricted
ENSMUSG00000005232	Aire-regulated TRA	Aire_regulated	restricted
ENSMUSG00000005233	non-Aire TRA	not_Aire_regulated	restricted
ENSMUSG00000005237	Aire-regulated TRA	Aire_regulated	restricted
ENSMUSG00000005251	non-TRA	not_Aire_regulated	not_restricted
ENSMUSG00000005262	non-TRA	not_Aire_regulated	not_restricted
ENSMUSG00000005267	non-TRA	not_Aire_regulated	not_restricted
ENSMUSG00000005268	non-TRA	not_Aire_regulated	not_restricted
ENSMUSG00000005299	non-TRA	not_Aire_regulated	not_restricted
ENSMUSG00000005312	non-TRA	not_Aire_regulated	not_restricted
ENSMUSG00000005320	non-TRA	Aire_regulated	not_restricted
ENSMUSG00000005338	non-Aire TRA	not_Aire_regulated	restricted
ENSMUSG00000005339	Aire-regulated TRA	Aire_regulated	restricted
ENSMUSG00000005354	non-TRA	not_Aire_regulated	not_restricted
ENSMUSG00000005355	Aire-regulated TRA	Aire_regulated	restricted
ENSMUSG00000005357	Aire-regulated TRA	Aire_regulated	restricted
ENSMUSG00000005360	non-TRA	not_Aire_regulated	not_restricted
ENSMUSG00000005362	non-TRA	not_Aire_regulated	not_restricted
ENSMUSG00000005364	Aire-regulated TRA	Aire_regulated	restricted
ENSMUSG00000005370	non-TRA	not_Aire_regulated	not_restricted
ENSMUSG00000005371	non-TRA	not_Aire_regulated	not_restricted
ENSMUSG00000005373	non-TRA	Aire_regulated	not_restricted
ENSMUSG00000005374	non-TRA	not_Aire_regulated	not_restricted
ENSMUSG00000005378	non-TRA	not_Aire_regulated	not_restricted
ENSMUSG00000005397	non-TRA	Aire_regulated	not_restricted
ENSMUSG00000005410	non-TRA	not_Aire_regulated	not_restricted
ENSMUSG00000005413	non-TRA	not_Aire_regulated	not_restricted
ENSMUSG00000005417	non-TRA	not_Aire_regulated	not_restricted
ENSMUSG00000005442	non-TRA	not_Aire_regulated	not_restricted
ENSMUSG00000005447	non-TRA	not_Aire_regulated	not_restricted
ENSMUSG00000005465	non-Aire TRA	not_Aire_regulated	restricted
ENSMUSG00000005469	non-TRA	not_Aire_regulated	not_restricted
ENSMUSG00000005470	non-TRA	not_Aire_regulated	not_restricted
ENSMUSG00000005474	Aire-regulated TRA	Aire_regulated	restricted
ENSMUSG00000005481	non-TRA	not_Aire_regulated	not_restricted
ENSMUSG00000005483	non-TRA	not_Aire_regulated	not_restricted
ENSMUSG00000005493	Aire-regulated TRA	Aire_regulated	restricted
ENSMUSG00000005501	non-TRA	not_Aire_regulated	not_restricted
ENSMUSG00000005503	non-Aire TRA	not_Aire_regulated	restricted
ENSMUSG00000005505	non-TRA	not_Aire_regulated	not_restricted
ENSMUSG00000005506	non-TRA	not_Aire_regulated	not_restricted
ENSMUSG00000005510	non-TRA	not_Aire_regulated	not_restricted
ENSMUSG00000005514	non-TRA	not_Aire_regulated	not_restricted
ENSMUSG00000005533	non-TRA	not_Aire_regulated	not_restricted
ENSMUSG00000005534	non-TRA	not_Aire_regulated	not_restricted
ENSMUSG00000005540	non-Aire TRA	not_Aire_regulated	restricted
ENSMUSG00000005547	Aire-regulated TRA	Aire_regulated	restricted
ENSMUSG00000005553	Aire-regulated TRA	Aire_regulated	restricted
ENSMUSG00000005566	non-TRA	not_Aire_regulated	not_restricted
ENSMUSG00000005575	non-TRA	not_Aire_regulated	not_restricted
ENSMUSG00000005580	non-TRA	not_Aire_regulated	not_restricted
ENSMUSG00000005583	non-TRA	Aire_regulated	not_restricted
ENSMUSG00000005609	non-TRA	not_Aire_regulated	not_restricted
ENSMUSG00000005610	non-TRA	not_Aire_regulated	not_restricted
ENSMUSG00000005611	non-TRA	Aire_regulated	not_restricted
ENSMUSG00000005615	non-TRA	not_Aire_regulated	not_restricted
ENSMUSG00000005621	non-TRA	not_Aire_regulated	not_restricted
ENSMUSG00000005625	non-TRA	not_Aire_regulated	not_restricted
ENSMUSG00000005628	non-Aire TRA	not_Aire_regulated	restricted
ENSMUSG00000005640	non-Aire TRA	not_Aire_regulated	restricted
ENSMUSG00000005649	Aire-regulated TRA	Aire_regulated	restricted
ENSMUSG00000005656	non-TRA	not_Aire_regulated	not_restricted
ENSMUSG00000005667	non-TRA	not_Aire_regulated	not_restricted
ENSMUSG00000005672	non-TRA	not_Aire_regulated	not_restricted
ENSMUSG00000005674	non-TRA	not_Aire_regulated	not_restricted
ENSMUSG00000005677	non-Aire TRA	not_Aire_regulated	restricted
ENSMUSG00000005681	Aire-regulated TRA	Aire_regulated	restricted
ENSMUSG00000005682	non-TRA	not_Aire_regulated	not_restricted
ENSMUSG00000005683	non-TRA	not_Aire_regulated	not_restricted
ENSMUSG00000005686	non-TRA	not_Aire_regulated	not_restricted
ENSMUSG00000005687	non-TRA	not_Aire_regulated	not_restricted
ENSMUSG00000005696	non-Aire TRA	not_Aire_regulated	restricted
ENSMUSG00000005698	non-TRA	not_Aire_regulated	not_restricted
ENSMUSG00000005699	non-TRA	not_Aire_regulated	not_restricted
ENSMUSG00000005705	Aire-regulated TRA	Aire_regulated	restricted
ENSMUSG00000005716	non-Aire TRA	not_Aire_regulated	restricted
ENSMUSG00000005718	non-TRA	not_Aire_regulated	not_restricted
ENSMUSG00000005732	non-TRA	not_Aire_regulated	not_restricted
ENSMUSG00000005763	non-TRA	not_Aire_regulated	not_restricted
ENSMUSG00000005774	non-TRA	not_Aire_regulated	not_restricted
ENSMUSG00000005779	non-TRA	not_Aire_regulated	not_restricted
ENSMUSG00000005800	Aire-regulated TRA	Aire_regulated	restricted
ENSMUSG00000005802	non-TRA	not_Aire_regulated	not_restricted
ENSMUSG00000005803	non-TRA	not_Aire_regulated	not_restricted
ENSMUSG00000005804	non-TRA	not_Aire_regulated	not_restricted
ENSMUSG00000005813	non-TRA	not_Aire_regulated	not_restricted
ENSMUSG00000005823	non-TRA	not_Aire_regulated	not_restricted
ENSMUSG00000005824	Aire-regulated TRA	Aire_regulated	restricted
ENSMUSG00000005836	non-TRA	Aire_regulated	not_restricted
ENSMUSG00000005846	non-TRA	not_Aire_regulated	not_restricted
ENSMUSG00000005864	non-Aire TRA	not_Aire_regulated	restricted
ENSMUSG00000005871	non-TRA	not_Aire_regulated	not_restricted
ENSMUSG00000005873	non-TRA	not_Aire_regulated	not_restricted
ENSMUSG00000005881	non-TRA	not_Aire_regulated	not_restricted
ENSMUSG00000005882	non-TRA	not_Aire_regulated	not_restricted
ENSMUSG00000005883	non-Aire TRA	not_Aire_regulated	restricted
ENSMUSG00000005886	non-TRA	not_Aire_regulated	not_restricted
ENSMUSG00000005891	non-Aire TRA	not_Aire_regulated	restricted
ENSMUSG00000005892	Aire-regulated TRA	Aire_regulated	restricted
ENSMUSG00000005893	non-TRA	not_Aire_regulated	not_restricted
ENSMUSG00000005897	non-TRA	not_Aire_regulated	not_restricted
ENSMUSG00000005899	non-TRA	not_Aire_regulated	not_restricted
ENSMUSG00000005907	non-TRA	not_Aire_regulated	not_restricted
ENSMUSG00000005917	non-Aire TRA	not_Aire_regulated	restricted
ENSMUSG00000005936	non-TRA	not_Aire_regulated	not_restricted
ENSMUSG00000005947	Aire-regulated TRA	Aire_regulated	restricted
ENSMUSG00000005949	non-TRA	not_Aire_regulated	not_restricted
ENSMUSG00000005950	non-TRA	not_Aire_regulated	not_restricted
ENSMUSG00000005951	non-TRA	not_Aire_regulated	not_restricted
ENSMUSG00000005952	Aire-regulated TRA	Aire_regulated	restricted
ENSMUSG00000005958	non-TRA	not_Aire_regulated	not_restricted
ENSMUSG00000005968	non-TRA	not_Aire_regulated	not_restricted
ENSMUSG00000005973	non-TRA	not_Aire_regulated	not_restricted
ENSMUSG00000005980	Aire-regulated TRA	Aire_regulated	restricted
ENSMUSG00000005981	non-TRA	not_Aire_regulated	not_restricted
ENSMUSG00000005982	non-TRA	not_Aire_regulated	not_restricted
ENSMUSG00000005983	non-Aire TRA	not_Aire_regulated	restricted
ENSMUSG00000005986	non-TRA	not_Aire_regulated	not_restricted
ENSMUSG00000005994	Aire-regulated TRA	Aire_regulated	restricted
ENSMUSG00000006005	non-TRA	not_Aire_regulated	not_restricted
ENSMUSG00000006007	Aire-regulated TRA	Aire_regulated	restricted
ENSMUSG00000006010	non-TRA	not_Aire_regulated	not_restricted
ENSMUSG00000006014	Aire-regulated TRA	Aire_regulated	restricted
ENSMUSG00000006019	non-TRA	not_Aire_regulated	not_restricted
ENSMUSG00000006021	non-TRA	not_Aire_regulated	not_restricted
ENSMUSG00000006024	non-TRA	not_Aire_regulated	not_restricted
ENSMUSG00000006050	non-TRA	not_Aire_regulated	not_restricted
ENSMUSG00000006056	Aire-regulated TRA	Aire_regulated	restricted
ENSMUSG00000006057	non-TRA	not_Aire_regulated	not_restricted
ENSMUSG00000006058	non-TRA	not_Aire_regulated	not_restricted
ENSMUSG00000006095	non-TRA	not_Aire_regulated	not_restricted
ENSMUSG00000006127	non-TRA	not_Aire_regulated	not_restricted
ENSMUSG00000006134	non-TRA	not_Aire_regulated	not_restricted
ENSMUSG00000006143	Aire-regulated TRA	Aire_regulated	restricted
ENSMUSG00000006154	non-TRA	not_Aire_regulated	not_restricted
ENSMUSG00000006169	non-TRA	not_Aire_regulated	not_restricted
ENSMUSG00000006179	non-Aire TRA	not_Aire_regulated	restricted
ENSMUSG00000006191	non-TRA	not_Aire_regulated	not_restricted
ENSMUSG00000006200	Aire-regulated TRA	Aire_regulated	restricted
ENSMUSG00000006204	Aire-regulated TRA	Aire_regulated	restricted
ENSMUSG00000006205	non-TRA	not_Aire_regulated	not_restricted
ENSMUSG00000006215	non-TRA	not_Aire_regulated	not_restricted
ENSMUSG00000006216	Aire-regulated TRA	Aire_regulated	restricted
ENSMUSG00000006218	non-TRA	Aire_regulated	not_restricted
ENSMUSG00000006219	non-TRA	not_Aire_regulated	not_restricted
ENSMUSG00000006221	Aire-regulated TRA	Aire_regulated	restricted
ENSMUSG00000006235	non-TRA	Aire_regulated	not_restricted
ENSMUSG00000006241	non-TRA	not_Aire_regulated	not_restricted
ENSMUSG00000006262	non-TRA	not_Aire_regulated	not_restricted
ENSMUSG00000006269	Aire-regulated TRA	Aire_regulated	restricted
ENSMUSG00000006270	Aire-regulated TRA	Aire_regulated	restricted
ENSMUSG00000006273	non-TRA	not_Aire_regulated	not_restricted
ENSMUSG00000006276	non-TRA	not_Aire_regulated	not_restricted
ENSMUSG00000006281	non-TRA	not_Aire_regulated	not_restricted
ENSMUSG00000006288	non-TRA	not_Aire_regulated	not_restricted
ENSMUSG00000006289	non-TRA	not_Aire_regulated	not_restricted
ENSMUSG00000006299	non-TRA	not_Aire_regulated	not_restricted
ENSMUSG00000006301	non-TRA	not_Aire_regulated	not_restricted
ENSMUSG00000006304	non-TRA	not_Aire_regulated	not_restricted
ENSMUSG00000006307	non-TRA	not_Aire_regulated	not_restricted
ENSMUSG00000006310	non-Aire TRA	not_Aire_regulated	restricted
ENSMUSG00000006311	Aire-regulated TRA	Aire_regulated	restricted
ENSMUSG00000006313	non-Aire TRA	not_Aire_regulated	restricted
ENSMUSG00000006315	non-TRA	not_Aire_regulated	not_restricted
ENSMUSG00000006333	non-TRA	not_Aire_regulated	not_restricted
ENSMUSG00000006335	non-TRA	not_Aire_regulated	not_restricted
ENSMUSG00000006342	non-TRA	not_Aire_regulated	not_restricted
ENSMUSG00000006344	non-TRA	not_Aire_regulated	not_restricted
ENSMUSG00000006345	Aire-regulated TRA	Aire_regulated	restricted
ENSMUSG00000006356	non-TRA	not_Aire_regulated	not_restricted
ENSMUSG00000006360	non-TRA	not_Aire_regulated	not_restricted
ENSMUSG00000006362	non-TRA	not_Aire_regulated	not_restricted
ENSMUSG00000006369	non-TRA	not_Aire_regulated	not_restricted
ENSMUSG00000006373	non-TRA	not_Aire_regulated	not_restricted
ENSMUSG00000006378	non-TRA	not_Aire_regulated	not_restricted
ENSMUSG00000006386	non-TRA	not_Aire_regulated	not_restricted
ENSMUSG00000006389	non-Aire TRA	not_Aire_regulated	restricted
ENSMUSG00000006390	non-TRA	not_Aire_regulated	not_restricted
ENSMUSG00000006392	non-TRA	not_Aire_regulated	not_restricted
ENSMUSG00000006398	non-TRA	not_Aire_regulated	not_restricted
ENSMUSG00000006403	non-TRA	not_Aire_regulated	not_restricted
ENSMUSG00000006411	non-TRA	not_Aire_regulated	not_restricted
ENSMUSG00000006412	non-TRA	not_Aire_regulated	not_restricted
ENSMUSG00000006418	non-TRA	not_Aire_regulated	not_restricted
ENSMUSG00000006423	non-TRA	not_Aire_regulated	not_restricted
ENSMUSG00000006435	non-TRA	not_Aire_regulated	not_restricted
ENSMUSG00000006442	non-TRA	not_Aire_regulated	not_restricted
ENSMUSG00000006445	non-TRA	not_Aire_regulated	not_restricted
ENSMUSG00000006456	non-TRA	not_Aire_regulated	not_restricted
ENSMUSG00000006457	non-Aire TRA	not_Aire_regulated	restricted
ENSMUSG00000006463	non-TRA	not_Aire_regulated	not_restricted
ENSMUSG00000006464	non-TRA	not_Aire_regulated	not_restricted
ENSMUSG00000006469	Aire-regulated TRA	Aire_regulated	restricted
ENSMUSG00000006471	non-TRA	not_Aire_regulated	not_restricted
ENSMUSG00000006476	non-TRA	not_Aire_regulated	not_restricted
ENSMUSG00000006488	non-Aire TRA	not_Aire_regulated	restricted
ENSMUSG00000006490	Aire-regulated TRA	Aire_regulated	restricted
ENSMUSG00000006494	non-TRA	not_Aire_regulated	not_restricted
ENSMUSG00000006498	non-TRA	not_Aire_regulated	not_restricted
ENSMUSG00000006517	non-TRA	not_Aire_regulated	not_restricted
ENSMUSG00000006519	non-TRA	not_Aire_regulated	not_restricted
ENSMUSG00000006522	Aire-regulated TRA	Aire_regulated	restricted
ENSMUSG00000006526	non-TRA	not_Aire_regulated	not_restricted
ENSMUSG00000006527	non-TRA	not_Aire_regulated	not_restricted
ENSMUSG00000006529	non-Aire TRA	not_Aire_regulated	restricted
ENSMUSG00000006538	non-TRA	Aire_regulated	not_restricted
ENSMUSG00000006542	non-Aire TRA	not_Aire_regulated	restricted
ENSMUSG00000006546	Aire-regulated TRA	Aire_regulated	restricted
ENSMUSG00000006567	non-TRA	Aire_regulated	not_restricted
ENSMUSG00000006570	Aire-regulated TRA	Aire_regulated	restricted
ENSMUSG00000006574	Aire-regulated TRA	Aire_regulated	restricted
ENSMUSG00000006575	non-Aire TRA	not_Aire_regulated	restricted
ENSMUSG00000006576	non-TRA	not_Aire_regulated	not_restricted
ENSMUSG00000006585	non-TRA	not_Aire_regulated	not_restricted
ENSMUSG00000006586	non-TRA	not_Aire_regulated	not_restricted
ENSMUSG00000006587	non-TRA	not_Aire_regulated	not_restricted
ENSMUSG00000006589	non-TRA	not_Aire_regulated	not_restricted
ENSMUSG00000006599	non-TRA	not_Aire_regulated	not_restricted
ENSMUSG00000006611	non-TRA	not_Aire_regulated	not_restricted
ENSMUSG00000006641	non-TRA	not_Aire_regulated	not_restricted
ENSMUSG00000006642	Aire-regulated TRA	Aire_regulated	restricted
ENSMUSG00000006649	Aire-regulated TRA	Aire_regulated	restricted
ENSMUSG00000006651	non-TRA	not_Aire_regulated	not_restricted
ENSMUSG00000006673	non-TRA	not_Aire_regulated	not_restricted
ENSMUSG00000006675	non-TRA	not_Aire_regulated	not_restricted
ENSMUSG00000006676	non-TRA	not_Aire_regulated	not_restricted
ENSMUSG00000006678	non-Aire TRA	not_Aire_regulated	restricted
ENSMUSG00000006699	non-TRA	not_Aire_regulated	not_restricted
ENSMUSG00000006705	non-TRA	not_Aire_regulated	not_restricted
ENSMUSG00000006711	non-Aire TRA	not_Aire_regulated	restricted
ENSMUSG00000006715	non-TRA	not_Aire_regulated	not_restricted
ENSMUSG00000006717	non-TRA	not_Aire_regulated	not_restricted
ENSMUSG00000006720	non-TRA	not_Aire_regulated	not_restricted
ENSMUSG00000006724	Aire-regulated TRA	Aire_regulated	restricted
ENSMUSG00000006728	non-TRA	not_Aire_regulated	not_restricted
ENSMUSG00000006731	non-TRA	not_Aire_regulated	not_restricted
ENSMUSG00000006732	non-TRA	not_Aire_regulated	not_restricted
ENSMUSG00000006736	non-TRA	not_Aire_regulated	not_restricted
ENSMUSG00000006740	non-TRA	not_Aire_regulated	not_restricted
ENSMUSG00000006763	non-TRA	not_Aire_regulated	not_restricted
ENSMUSG00000006764	Aire-regulated TRA	Aire_regulated	restricted
ENSMUSG00000006777	Aire-regulated TRA	Aire_regulated	restricted
ENSMUSG00000006782	non-TRA	not_Aire_regulated	not_restricted
ENSMUSG00000006784	non-Aire TRA	not_Aire_regulated	restricted
ENSMUSG00000006800	non-TRA	not_Aire_regulated	not_restricted
ENSMUSG00000006818	non-TRA	not_Aire_regulated	not_restricted
ENSMUSG00000006850	non-TRA	not_Aire_regulated	not_restricted
ENSMUSG00000006906	non-TRA	not_Aire_regulated	not_restricted
ENSMUSG00000006920	non-TRA	not_Aire_regulated	not_restricted
ENSMUSG00000006930	non-TRA	not_Aire_regulated	not_restricted
ENSMUSG00000006931	non-TRA	Aire_regulated	not_restricted
ENSMUSG00000006932	non-TRA	not_Aire_regulated	not_restricted
ENSMUSG00000006941	non-TRA	not_Aire_regulated	not_restricted
ENSMUSG00000006948	Aire-regulated TRA	Aire_regulated	restricted
ENSMUSG00000006958	non-TRA	Aire_regulated	not_restricted
ENSMUSG00000006998	non-TRA	not_Aire_regulated	not_restricted
ENSMUSG00000007021	non-Aire TRA	not_Aire_regulated	restricted
ENSMUSG00000007029	non-TRA	not_Aire_regulated	not_restricted
ENSMUSG00000007030	non-TRA	not_Aire_regulated	not_restricted
ENSMUSG00000007033	non-Aire TRA	not_Aire_regulated	restricted
ENSMUSG00000007034	non-TRA	Aire_regulated	not_restricted
ENSMUSG00000007035	non-TRA	Aire_regulated	not_restricted
ENSMUSG00000007036	non-TRA	not_Aire_regulated	not_restricted
ENSMUSG00000007038	non-TRA	not_Aire_regulated	not_restricted
ENSMUSG00000007039	non-TRA	not_Aire_regulated	not_restricted
ENSMUSG00000007041	non-TRA	not_Aire_regulated	not_restricted
ENSMUSG00000007050	non-TRA	not_Aire_regulated	not_restricted
ENSMUSG00000007080	non-TRA	not_Aire_regulated	not_restricted
ENSMUSG00000007097	non-TRA	not_Aire_regulated	not_restricted
ENSMUSG00000007107	non-Aire TRA	not_Aire_regulated	restricted
ENSMUSG00000007122	non-Aire TRA	not_Aire_regulated	restricted
ENSMUSG00000007207	non-TRA	not_Aire_regulated	not_restricted
ENSMUSG00000007209	Aire-regulated TRA	Aire_regulated	restricted
ENSMUSG00000007216	non-TRA	not_Aire_regulated	not_restricted
ENSMUSG00000007279	non-TRA	not_Aire_regulated	not_restricted
ENSMUSG00000007338	non-TRA	not_Aire_regulated	not_restricted
ENSMUSG00000007379	non-TRA	not_Aire_regulated	not_restricted
ENSMUSG00000007411	non-TRA	not_Aire_regulated	not_restricted
ENSMUSG00000007415	non-TRA	not_Aire_regulated	not_restricted
ENSMUSG00000007440	non-Aire TRA	not_Aire_regulated	restricted
ENSMUSG00000007457	non-TRA	Aire_regulated	not_restricted
ENSMUSG00000007458	non-TRA	not_Aire_regulated	not_restricted
ENSMUSG00000007476	non-TRA	not_Aire_regulated	not_restricted
ENSMUSG00000007480	non-Aire TRA	not_Aire_regulated	restricted
ENSMUSG00000007564	non-TRA	not_Aire_regulated	not_restricted
ENSMUSG00000007570	non-TRA	not_Aire_regulated	not_restricted
ENSMUSG00000007589	non-TRA	not_Aire_regulated	not_restricted
ENSMUSG00000007591	non-Aire TRA	not_Aire_regulated	restricted
ENSMUSG00000007594	Aire-regulated TRA	Aire_regulated	restricted
ENSMUSG00000007603	non-TRA	not_Aire_regulated	not_restricted
ENSMUSG00000007610	non-TRA	not_Aire_regulated	not_restricted
ENSMUSG00000007613	non-TRA	not_Aire_regulated	not_restricted
ENSMUSG00000007617	non-TRA	not_Aire_regulated	not_restricted
ENSMUSG00000007646	non-Aire TRA	not_Aire_regulated	restricted
ENSMUSG00000007653	Aire-regulated TRA	Aire_regulated	restricted
ENSMUSG00000007655	non-TRA	Aire_regulated	not_restricted
ENSMUSG00000007656	non-TRA	not_Aire_regulated	not_restricted
ENSMUSG00000007659	non-TRA	not_Aire_regulated	not_restricted
ENSMUSG00000007670	non-TRA	not_Aire_regulated	not_restricted
ENSMUSG00000007682	Aire-regulated TRA	Aire_regulated	restricted
ENSMUSG00000007721	non-TRA	not_Aire_regulated	not_restricted
ENSMUSG00000007739	non-TRA	not_Aire_regulated	not_restricted
ENSMUSG00000007777	non-TRA	not_Aire_regulated	not_restricted
ENSMUSG00000007783	non-TRA	not_Aire_regulated	not_restricted
ENSMUSG00000007805	non-TRA	Aire_regulated	not_restricted
ENSMUSG00000007812	non-TRA	not_Aire_regulated	not_restricted
ENSMUSG00000007815	non-TRA	not_Aire_regulated	not_restricted
ENSMUSG00000007817	non-TRA	not_Aire_regulated	not_restricted
ENSMUSG00000007827	non-TRA	not_Aire_regulated	not_restricted
ENSMUSG00000007833	non-TRA	not_Aire_regulated	not_restricted
ENSMUSG00000007836	non-TRA	not_Aire_regulated	not_restricted
ENSMUSG00000007837	non-TRA	not_Aire_regulated	not_restricted
ENSMUSG00000007850	non-TRA	not_Aire_regulated	not_restricted
ENSMUSG00000007867	non-TRA	not_Aire_regulated	not_restricted
ENSMUSG00000007872	non-TRA	Aire_regulated	not_restricted
ENSMUSG00000007877	Aire-regulated TRA	Aire_regulated	restricted
ENSMUSG00000007880	non-TRA	not_Aire_regulated	not_restricted
ENSMUSG00000007888	Aire-regulated TRA	Aire_regulated	restricted
ENSMUSG00000007891	non-TRA	not_Aire_regulated	not_restricted
ENSMUSG00000007892	non-TRA	not_Aire_regulated	not_restricted
ENSMUSG00000007907	Aire-regulated TRA	Aire_regulated	restricted
ENSMUSG00000007908	non-Aire TRA	not_Aire_regulated	restricted
ENSMUSG00000007944	non-Aire TRA	not_Aire_regulated	restricted
ENSMUSG00000007946	non-Aire TRA	not_Aire_regulated	restricted
ENSMUSG00000007950	non-TRA	not_Aire_regulated	not_restricted
ENSMUSG00000007987	non-TRA	not_Aire_regulated	not_restricted
ENSMUSG00000007989	non-TRA	Aire_regulated	not_restricted
ENSMUSG00000008028	non-Aire TRA	not_Aire_regulated	restricted
ENSMUSG00000008035	non-TRA	not_Aire_regulated	not_restricted
ENSMUSG00000008036	non-TRA	not_Aire_regulated	not_restricted
ENSMUSG00000008090	non-TRA	not_Aire_regulated	not_restricted
ENSMUSG00000008129	non-Aire TRA	not_Aire_regulated	restricted
ENSMUSG00000008136	non-TRA	Aire_regulated	not_restricted
ENSMUSG00000008140	non-TRA	not_Aire_regulated	not_restricted
ENSMUSG00000008153	non-TRA	Aire_regulated	not_restricted
ENSMUSG00000008167	non-TRA	not_Aire_regulated	not_restricted
ENSMUSG00000008193	non-Aire TRA	not_Aire_regulated	restricted
ENSMUSG00000008200	non-TRA	not_Aire_regulated	not_restricted
ENSMUSG00000008206	non-TRA	not_Aire_regulated	not_restricted
ENSMUSG00000008226	non-TRA	not_Aire_regulated	not_restricted
ENSMUSG00000008301	non-TRA	not_Aire_regulated	not_restricted
ENSMUSG00000008305	non-TRA	not_Aire_regulated	not_restricted
ENSMUSG00000008307	non-Aire TRA	not_Aire_regulated	restricted
ENSMUSG00000008318	non-TRA	not_Aire_regulated	not_restricted
ENSMUSG00000008333	non-TRA	not_Aire_regulated	not_restricted
ENSMUSG00000008348	non-TRA	not_Aire_regulated	not_restricted
ENSMUSG00000008373	non-TRA	not_Aire_regulated	not_restricted
ENSMUSG00000008384	non-TRA	not_Aire_regulated	not_restricted
ENSMUSG00000008393	non-TRA	not_Aire_regulated	not_restricted
ENSMUSG00000008398	non-TRA	not_Aire_regulated	not_restricted
ENSMUSG00000008429	non-TRA	not_Aire_regulated	not_restricted
ENSMUSG00000008435	non-TRA	not_Aire_regulated	not_restricted
ENSMUSG00000008438	non-Aire TRA	not_Aire_regulated	restricted
ENSMUSG00000008450	non-TRA	not_Aire_regulated	not_restricted
ENSMUSG00000008461	non-Aire TRA	not_Aire_regulated	restricted
ENSMUSG00000008475	non-TRA	not_Aire_regulated	not_restricted
ENSMUSG00000008482	non-Aire TRA	not_Aire_regulated	restricted
ENSMUSG00000008489	Aire-regulated TRA	Aire_regulated	restricted
ENSMUSG00000008496	Aire-regulated TRA	Aire_regulated	restricted
ENSMUSG00000008540	non-TRA	not_Aire_regulated	not_restricted
ENSMUSG00000008575	non-TRA	not_Aire_regulated	not_restricted
ENSMUSG00000008590	Aire-regulated TRA	Aire_regulated	restricted
ENSMUSG00000008601	non-TRA	not_Aire_regulated	not_restricted
ENSMUSG00000008604	non-TRA	not_Aire_regulated	not_restricted
ENSMUSG00000008658	non-Aire TRA	not_Aire_regulated	restricted
ENSMUSG00000008668	non-TRA	not_Aire_regulated	not_restricted
ENSMUSG00000008682	non-TRA	not_Aire_regulated	not_restricted
ENSMUSG00000008683	non-TRA	not_Aire_regulated	not_restricted
ENSMUSG00000008690	non-TRA	not_Aire_regulated	not_restricted
ENSMUSG00000008730	non-TRA	not_Aire_regulated	not_restricted
ENSMUSG00000008734	non-TRA	not_Aire_regulated	not_restricted
ENSMUSG00000008763	non-TRA	not_Aire_regulated	not_restricted
ENSMUSG00000008789	Aire-regulated TRA	Aire_regulated	restricted
ENSMUSG00000008813	Aire-regulated TRA	Aire_regulated	restricted
ENSMUSG00000008822	non-TRA	not_Aire_regulated	not_restricted
ENSMUSG00000008843	non-Aire TRA	not_Aire_regulated	restricted
ENSMUSG00000008845	non-TRA	Aire_regulated	not_restricted
ENSMUSG00000008855	non-TRA	Aire_regulated	not_restricted
ENSMUSG00000008859	non-TRA	not_Aire_regulated	not_restricted
ENSMUSG00000008874	Aire-regulated TRA	Aire_regulated	restricted
ENSMUSG00000008892	non-TRA	not_Aire_regulated	not_restricted
ENSMUSG00000008932	Aire-regulated TRA	Aire_regulated	restricted
ENSMUSG00000008958	non-TRA	not_Aire_regulated	not_restricted
ENSMUSG00000008976	non-TRA	not_Aire_regulated	not_restricted
ENSMUSG00000008999	non-TRA	not_Aire_regulated	not_restricted
ENSMUSG00000009013	non-TRA	not_Aire_regulated	not_restricted
ENSMUSG00000009030	non-TRA	not_Aire_regulated	not_restricted
ENSMUSG00000009035	non-TRA	not_Aire_regulated	not_restricted
ENSMUSG00000009047	non-Aire TRA	not_Aire_regulated	restricted
ENSMUSG00000009070	Aire-regulated TRA	Aire_regulated	restricted
ENSMUSG00000009073	non-TRA	not_Aire_regulated	not_restricted
ENSMUSG00000009075	Aire-regulated TRA	Aire_regulated	restricted
ENSMUSG00000009076	non-TRA	not_Aire_regulated	not_restricted
ENSMUSG00000009079	non-TRA	not_Aire_regulated	not_restricted
ENSMUSG00000009090	non-TRA	not_Aire_regulated	not_restricted
ENSMUSG00000009092	non-TRA	not_Aire_regulated	not_restricted
ENSMUSG00000009093	Aire-regulated TRA	Aire_regulated	restricted
ENSMUSG00000009097	non-TRA	not_Aire_regulated	not_restricted
ENSMUSG00000009108	Aire-regulated TRA	Aire_regulated	restricted
ENSMUSG00000009112	non-TRA	not_Aire_regulated	not_restricted
ENSMUSG00000009114	Aire-regulated TRA	Aire_regulated	restricted
ENSMUSG00000009115	non-Aire TRA	not_Aire_regulated	restricted
ENSMUSG00000009145	non-TRA	not_Aire_regulated	not_restricted
ENSMUSG00000009185	non-TRA	Aire_regulated	not_restricted
ENSMUSG00000009207	non-TRA	not_Aire_regulated	not_restricted
ENSMUSG00000009210	non-Aire TRA	not_Aire_regulated	restricted
ENSMUSG00000009214	Aire-regulated TRA	Aire_regulated	restricted
ENSMUSG00000009216	non-Aire TRA	not_Aire_regulated	restricted
ENSMUSG00000009246	non-Aire TRA	not_Aire_regulated	restricted
ENSMUSG00000009248	Aire-regulated TRA	Aire_regulated	restricted
ENSMUSG00000009281	non-TRA	Aire_regulated	not_restricted
ENSMUSG00000009291	non-TRA	not_Aire_regulated	not_restricted
ENSMUSG00000009292	non-Aire TRA	not_Aire_regulated	restricted
ENSMUSG00000009293	non-TRA	not_Aire_regulated	not_restricted
ENSMUSG00000009350	Aire-regulated TRA	Aire_regulated	restricted
ENSMUSG00000009356	non-Aire TRA	not_Aire_regulated	restricted
ENSMUSG00000009376	non-TRA	not_Aire_regulated	not_restricted
ENSMUSG00000009378	non-TRA	not_Aire_regulated	not_restricted
ENSMUSG00000009394	non-TRA	not_Aire_regulated	not_restricted
ENSMUSG00000009406	non-TRA	not_Aire_regulated	not_restricted
ENSMUSG00000009418	non-TRA	not_Aire_regulated	not_restricted
ENSMUSG00000009470	non-TRA	not_Aire_regulated	not_restricted
ENSMUSG00000009471	Aire-regulated TRA	Aire_regulated	restricted
ENSMUSG00000009487	Aire-regulated TRA	Aire_regulated	restricted
ENSMUSG00000009535	non-TRA	not_Aire_regulated	not_restricted
ENSMUSG00000009545	non-TRA	not_Aire_regulated	not_restricted
ENSMUSG00000009549	non-TRA	not_Aire_regulated	not_restricted
ENSMUSG00000009551	non-Aire TRA	not_Aire_regulated	restricted
ENSMUSG00000009555	non-TRA	not_Aire_regulated	not_restricted
ENSMUSG00000009563	non-TRA	not_Aire_regulated	not_restricted
ENSMUSG00000009566	non-TRA	not_Aire_regulated	not_restricted
ENSMUSG00000009569	non-TRA	not_Aire_regulated	not_restricted
ENSMUSG00000009575	non-TRA	not_Aire_regulated	not_restricted
ENSMUSG00000009580	Aire-regulated TRA	Aire_regulated	restricted
ENSMUSG00000009585	non-TRA	not_Aire_regulated	not_restricted
ENSMUSG00000009588	non-Aire TRA	not_Aire_regulated	restricted
ENSMUSG00000009596	Aire-regulated TRA	Aire_regulated	restricted
ENSMUSG00000009614	non-TRA	not_Aire_regulated	not_restricted
ENSMUSG00000009621	non-TRA	not_Aire_regulated	not_restricted
ENSMUSG00000009628	non-Aire TRA	not_Aire_regulated	restricted
ENSMUSG00000009630	non-TRA	not_Aire_regulated	not_restricted
ENSMUSG00000009633	non-TRA	Aire_regulated	not_restricted
ENSMUSG00000009640	non-TRA	not_Aire_regulated	not_restricted
ENSMUSG00000009646	Aire-regulated TRA	Aire_regulated	restricted
ENSMUSG00000009647	non-TRA	not_Aire_regulated	not_restricted
ENSMUSG00000009654	Aire-regulated TRA	Aire_regulated	restricted
ENSMUSG00000009670	non-Aire TRA	not_Aire_regulated	restricted
ENSMUSG00000009681	non-TRA	not_Aire_regulated	not_restricted
ENSMUSG00000009687	non-TRA	not_Aire_regulated	not_restricted
ENSMUSG00000009731	non-Aire TRA	not_Aire_regulated	restricted
ENSMUSG00000009733	non-TRA	not_Aire_regulated	not_restricted
ENSMUSG00000009734	non-Aire TRA	not_Aire_regulated	restricted
ENSMUSG00000009739	non-TRA	not_Aire_regulated	not_restricted
ENSMUSG00000009741	non-TRA	not_Aire_regulated	not_restricted
ENSMUSG00000009772	non-TRA	not_Aire_regulated	not_restricted
ENSMUSG00000009828	non-TRA	not_Aire_regulated	not_restricted
ENSMUSG00000009863	non-TRA	not_Aire_regulated	not_restricted
ENSMUSG00000009876	non-TRA	Aire_regulated	not_restricted
ENSMUSG00000009894	non-TRA	not_Aire_regulated	not_restricted
ENSMUSG00000009900	Aire-regulated TRA	Aire_regulated	restricted
ENSMUSG00000009905	non-TRA	not_Aire_regulated	not_restricted
ENSMUSG00000009907	non-TRA	not_Aire_regulated	not_restricted
ENSMUSG00000009927	non-TRA	not_Aire_regulated	not_restricted
ENSMUSG00000009941	non-Aire TRA	not_Aire_regulated	restricted
ENSMUSG00000009995	non-TRA	not_Aire_regulated	not_restricted
ENSMUSG00000010021	non-Aire TRA	not_Aire_regulated	restricted
ENSMUSG00000010025	non-TRA	not_Aire_regulated	not_restricted
ENSMUSG00000010044	Aire-regulated TRA	Aire_regulated	restricted
ENSMUSG00000010045	non-TRA	not_Aire_regulated	not_restricted
ENSMUSG00000010047	non-TRA	not_Aire_regulated	not_restricted
ENSMUSG00000010048	non-TRA	not_Aire_regulated	not_restricted
ENSMUSG00000010051	non-TRA	not_Aire_regulated	not_restricted
ENSMUSG00000010054	non-TRA	not_Aire_regulated	not_restricted
ENSMUSG00000010057	non-TRA	not_Aire_regulated	not_restricted
ENSMUSG00000010064	non-TRA	Aire_regulated	not_restricted
ENSMUSG00000010066	Aire-regulated TRA	Aire_regulated	restricted
ENSMUSG00000010067	non-TRA	not_Aire_regulated	not_restricted
ENSMUSG00000010080	non-TRA	Aire_regulated	not_restricted
ENSMUSG00000010086	Aire-regulated TRA	Aire_regulated	restricted
ENSMUSG00000010095	non-TRA	not_Aire_regulated	not_restricted
ENSMUSG00000010097	non-TRA	not_Aire_regulated	not_restricted
ENSMUSG00000010110	non-TRA	not_Aire_regulated	not_restricted
ENSMUSG00000010122	non-TRA	Aire_regulated	not_restricted
ENSMUSG00000010136	non-Aire TRA	not_Aire_regulated	restricted
ENSMUSG00000010142	Aire-regulated TRA	Aire_regulated	restricted
ENSMUSG00000010154	non-TRA	not_Aire_regulated	not_restricted
ENSMUSG00000010175	non-TRA	not_Aire_regulated	not_restricted
ENSMUSG00000010205	non-TRA	not_Aire_regulated	not_restricted
ENSMUSG00000010277	non-TRA	not_Aire_regulated	not_restricted
ENSMUSG00000010290	non-TRA	not_Aire_regulated	not_restricted
ENSMUSG00000010307	non-TRA	Aire_regulated	not_restricted
ENSMUSG00000010311	non-Aire TRA	not_Aire_regulated	restricted
ENSMUSG00000010342	non-Aire TRA	not_Aire_regulated	restricted
ENSMUSG00000010358	non-TRA	not_Aire_regulated	not_restricted
ENSMUSG00000010362	non-TRA	not_Aire_regulated	not_restricted
ENSMUSG00000010376	non-TRA	not_Aire_regulated	not_restricted
ENSMUSG00000010392	non-TRA	not_Aire_regulated	not_restricted
ENSMUSG00000010406	non-TRA	not_Aire_regulated	not_restricted
ENSMUSG00000010435	Aire-regulated TRA	Aire_regulated	restricted
ENSMUSG00000010453	non-TRA	not_Aire_regulated	not_restricted
ENSMUSG00000010461	non-Aire TRA	not_Aire_regulated	restricted
ENSMUSG00000010476	non-TRA	Aire_regulated	not_restricted
ENSMUSG00000010505	Aire-regulated TRA	Aire_regulated	restricted
ENSMUSG00000010517	non-TRA	not_Aire_regulated	not_restricted
ENSMUSG00000010529	non-Aire TRA	not_Aire_regulated	restricted
ENSMUSG00000010538	non-Aire TRA	not_Aire_regulated	restricted
ENSMUSG00000010554	non-TRA	not_Aire_regulated	not_restricted
ENSMUSG00000010592	Aire-regulated TRA	Aire_regulated	restricted
ENSMUSG00000010601	Aire-regulated TRA	Aire_regulated	restricted
ENSMUSG00000010607	non-TRA	not_Aire_regulated	not_restricted
ENSMUSG00000010608	non-TRA	not_Aire_regulated	not_restricted
ENSMUSG00000010609	non-TRA	not_Aire_regulated	not_restricted
ENSMUSG00000010651	non-TRA	Aire_regulated	not_restricted
ENSMUSG00000010660	non-TRA	not_Aire_regulated	not_restricted
ENSMUSG00000010663	non-TRA	not_Aire_regulated	not_restricted
ENSMUSG00000010721	non-TRA	not_Aire_regulated	not_restricted
ENSMUSG00000010751	non-TRA	not_Aire_regulated	not_restricted
ENSMUSG00000010755	non-TRA	not_Aire_regulated	not_restricted
ENSMUSG00000010760	Aire-regulated TRA	Aire_regulated	restricted
ENSMUSG00000010796	Aire-regulated TRA	Aire_regulated	restricted
ENSMUSG00000010797	non-Aire TRA	not_Aire_regulated	restricted
ENSMUSG00000010803	Aire-regulated TRA	Aire_regulated	restricted
ENSMUSG00000010825	Aire-regulated TRA	Aire_regulated	restricted
ENSMUSG00000010830	non-TRA	not_Aire_regulated	not_restricted
ENSMUSG00000010841	non-Aire TRA	not_Aire_regulated	restricted
ENSMUSG00000010911	non-TRA	not_Aire_regulated	not_restricted
ENSMUSG00000010914	non-TRA	not_Aire_regulated	not_restricted
ENSMUSG00000010936	non-TRA	not_Aire_regulated	not_restricted
ENSMUSG00000011008	Aire-regulated TRA	Aire_regulated	restricted
ENSMUSG00000011034	Aire-regulated TRA	Aire_regulated	restricted
ENSMUSG00000011096	non-TRA	not_Aire_regulated	not_restricted
ENSMUSG00000011114	non-TRA	not_Aire_regulated	not_restricted
ENSMUSG00000011118	Aire-regulated TRA	Aire_regulated	restricted
ENSMUSG00000011148	non-TRA	Aire_regulated	not_restricted
ENSMUSG00000011154	non-Aire TRA	not_Aire_regulated	restricted
ENSMUSG00000011158	non-TRA	not_Aire_regulated	not_restricted
ENSMUSG00000011171	Aire-regulated TRA	Aire_regulated	restricted
ENSMUSG00000011179	non-TRA	not_Aire_regulated	not_restricted
ENSMUSG00000011254	non-TRA	not_Aire_regulated	not_restricted
ENSMUSG00000011256	non-TRA	not_Aire_regulated	not_restricted
ENSMUSG00000011257	non-TRA	not_Aire_regulated	not_restricted
ENSMUSG00000011263	non-TRA	Aire_regulated	not_restricted
ENSMUSG00000011267	non-TRA	not_Aire_regulated	not_restricted
ENSMUSG00000011305	non-TRA	Aire_regulated	not_restricted
ENSMUSG00000011306	non-TRA	not_Aire_regulated	not_restricted
ENSMUSG00000011349	Aire-regulated TRA	Aire_regulated	restricted
ENSMUSG00000011382	non-TRA	not_Aire_regulated	not_restricted
ENSMUSG00000011427	non-TRA	not_Aire_regulated	not_restricted
ENSMUSG00000011463	Aire-regulated TRA	Aire_regulated	restricted
ENSMUSG00000011486	Aire-regulated TRA	Aire_regulated	restricted
ENSMUSG00000011589	Aire-regulated TRA	Aire_regulated	restricted
ENSMUSG00000011632	non-Aire TRA	not_Aire_regulated	restricted
ENSMUSG00000011658	non-TRA	not_Aire_regulated	not_restricted
ENSMUSG00000011751	non-Aire TRA	not_Aire_regulated	restricted
ENSMUSG00000011752	non-TRA	not_Aire_regulated	not_restricted
ENSMUSG00000011831	non-TRA	not_Aire_regulated	not_restricted
ENSMUSG00000011832	non-TRA	not_Aire_regulated	not_restricted
ENSMUSG00000011837	non-TRA	not_Aire_regulated	not_restricted
ENSMUSG00000011877	non-TRA	not_Aire_regulated	not_restricted
ENSMUSG00000011884	non-TRA	not_Aire_regulated	not_restricted
ENSMUSG00000011958	non-TRA	not_Aire_regulated	not_restricted
ENSMUSG00000011960	non-TRA	not_Aire_regulated	not_restricted
ENSMUSG00000012017	non-TRA	not_Aire_regulated	not_restricted
ENSMUSG00000012042	non-Aire TRA	not_Aire_regulated	restricted
ENSMUSG00000012076	non-TRA	not_Aire_regulated	not_restricted
ENSMUSG00000012114	non-TRA	not_Aire_regulated	not_restricted
ENSMUSG00000012117	non-TRA	not_Aire_regulated	not_restricted
ENSMUSG00000012123	non-TRA	Aire_regulated	not_restricted
ENSMUSG00000012126	non-Aire TRA	not_Aire_regulated	restricted
ENSMUSG00000012187	non-TRA	Aire_regulated	not_restricted
ENSMUSG00000012211	non-Aire TRA	not_Aire_regulated	restricted
ENSMUSG00000012282	non-Aire TRA	not_Aire_regulated	restricted
ENSMUSG00000012296	non-TRA	not_Aire_regulated	not_restricted
ENSMUSG00000012350	non-TRA	not_Aire_regulated	not_restricted
ENSMUSG00000012396	Aire-regulated TRA	Aire_regulated	restricted
ENSMUSG00000012405	non-TRA	not_Aire_regulated	not_restricted
ENSMUSG00000012422	non-TRA	not_Aire_regulated	not_restricted
ENSMUSG00000012428	non-TRA	not_Aire_regulated	not_restricted
ENSMUSG00000012429	non-TRA	not_Aire_regulated	not_restricted
ENSMUSG00000012443	non-Aire TRA	not_Aire_regulated	restricted
ENSMUSG00000012483	non-TRA	not_Aire_regulated	not_restricted
ENSMUSG00000012519	non-TRA	not_Aire_regulated	not_restricted
ENSMUSG00000012520	Aire-regulated TRA	Aire_regulated	restricted
ENSMUSG00000012535	non-TRA	not_Aire_regulated	not_restricted
ENSMUSG00000012609	non-TRA	not_Aire_regulated	not_restricted
ENSMUSG00000012640	non-TRA	not_Aire_regulated	not_restricted
ENSMUSG00000012705	non-TRA	not_Aire_regulated	not_restricted
ENSMUSG00000012777	Aire-regulated TRA	Aire_regulated	restricted
ENSMUSG00000012819	non-Aire TRA	not_Aire_regulated	restricted
ENSMUSG00000012848	non-TRA	not_Aire_regulated	not_restricted
ENSMUSG00000012889	Aire-regulated TRA	Aire_regulated	restricted
ENSMUSG00000013033	non-TRA	not_Aire_regulated	not_restricted
ENSMUSG00000013076	non-TRA	not_Aire_regulated	not_restricted
ENSMUSG00000013083	non-Aire TRA	not_Aire_regulated	restricted
ENSMUSG00000013089	non-TRA	not_Aire_regulated	not_restricted
ENSMUSG00000013091	non-Aire TRA	not_Aire_regulated	restricted
ENSMUSG00000013150	non-TRA	not_Aire_regulated	not_restricted
ENSMUSG00000013155	non-TRA	not_Aire_regulated	not_restricted
ENSMUSG00000013158	non-Aire TRA	not_Aire_regulated	restricted
ENSMUSG00000013160	non-TRA	not_Aire_regulated	not_restricted
ENSMUSG00000013236	non-TRA	not_Aire_regulated	not_restricted
ENSMUSG00000013275	non-TRA	not_Aire_regulated	not_restricted
ENSMUSG00000013338	Aire-regulated TRA	Aire_regulated	restricted
ENSMUSG00000013353	Aire-regulated TRA	Aire_regulated	restricted
ENSMUSG00000013367	Aire-regulated TRA	Aire_regulated	restricted
ENSMUSG00000013415	Aire-regulated TRA	Aire_regulated	restricted
ENSMUSG00000013418	non-Aire TRA	not_Aire_regulated	restricted
ENSMUSG00000013419	non-TRA	not_Aire_regulated	not_restricted
ENSMUSG00000013465	non-TRA	not_Aire_regulated	not_restricted
ENSMUSG00000013483	Aire-regulated TRA	Aire_regulated	restricted
ENSMUSG00000013495	non-TRA	not_Aire_regulated	not_restricted
ENSMUSG00000013523	Aire-regulated TRA	Aire_regulated	restricted
ENSMUSG00000013539	non-TRA	not_Aire_regulated	not_restricted
ENSMUSG00000013584	non-TRA	Aire_regulated	not_restricted
ENSMUSG00000013593	non-TRA	not_Aire_regulated	not_restricted
ENSMUSG00000013611	non-Aire TRA	not_Aire_regulated	restricted
ENSMUSG00000013622	non-TRA	not_Aire_regulated	not_restricted
ENSMUSG00000013629	non-TRA	not_Aire_regulated	not_restricted
ENSMUSG00000013643	non-Aire TRA	not_Aire_regulated	restricted
ENSMUSG00000013646	non-TRA	not_Aire_regulated	not_restricted
ENSMUSG00000013653	Aire-regulated TRA	Aire_regulated	restricted
ENSMUSG00000013662	non-TRA	not_Aire_regulated	not_restricted
ENSMUSG00000013663	non-TRA	not_Aire_regulated	not_restricted
ENSMUSG00000013668	Aire-regulated TRA	Aire_regulated	restricted
ENSMUSG00000013698	non-TRA	not_Aire_regulated	not_restricted
ENSMUSG00000013701	non-TRA	not_Aire_regulated	not_restricted
ENSMUSG00000013707	non-TRA	not_Aire_regulated	not_restricted
ENSMUSG00000013736	non-TRA	not_Aire_regulated	not_restricted
ENSMUSG00000013766	Aire-regulated TRA	Aire_regulated	restricted
ENSMUSG00000013787	non-TRA	not_Aire_regulated	not_restricted
ENSMUSG00000013822	non-TRA	not_Aire_regulated	not_restricted
ENSMUSG00000013833	non-TRA	not_Aire_regulated	not_restricted
ENSMUSG00000013846	non-TRA	Aire_regulated	not_restricted
ENSMUSG00000013858	non-TRA	not_Aire_regulated	not_restricted
ENSMUSG00000013878	non-TRA	not_Aire_regulated	not_restricted
ENSMUSG00000013921	Aire-regulated TRA	Aire_regulated	restricted
ENSMUSG00000013928	non-Aire TRA	not_Aire_regulated	restricted
ENSMUSG00000013936	Aire-regulated TRA	Aire_regulated	restricted
ENSMUSG00000013973	non-TRA	not_Aire_regulated	not_restricted
ENSMUSG00000013974	Aire-regulated TRA	Aire_regulated	restricted
ENSMUSG00000013997	non-TRA	not_Aire_regulated	not_restricted
ENSMUSG00000014030	non-Aire TRA	not_Aire_regulated	restricted
ENSMUSG00000014039	non-TRA	not_Aire_regulated	not_restricted
ENSMUSG00000014074	non-TRA	not_Aire_regulated	not_restricted
ENSMUSG00000014075	non-TRA	not_Aire_regulated	not_restricted
ENSMUSG00000014077	non-TRA	not_Aire_regulated	not_restricted
ENSMUSG00000014104	Aire-regulated TRA	Aire_regulated	restricted
ENSMUSG00000014158	non-TRA	Aire_regulated	not_restricted
ENSMUSG00000014164	non-TRA	not_Aire_regulated	not_restricted
ENSMUSG00000014177	non-TRA	not_Aire_regulated	not_restricted
ENSMUSG00000014195	non-TRA	not_Aire_regulated	not_restricted
ENSMUSG00000014198	Aire-regulated TRA	Aire_regulated	restricted
ENSMUSG00000014226	non-TRA	not_Aire_regulated	not_restricted
ENSMUSG00000014232	non-TRA	not_Aire_regulated	not_restricted
ENSMUSG00000014243	non-TRA	not_Aire_regulated	not_restricted
ENSMUSG00000014245	non-TRA	not_Aire_regulated	not_restricted
ENSMUSG00000014294	non-TRA	not_Aire_regulated	not_restricted
ENSMUSG00000014301	non-TRA	not_Aire_regulated	not_restricted
ENSMUSG00000014303	non-TRA	not_Aire_regulated	not_restricted
ENSMUSG00000014313	non-TRA	not_Aire_regulated	not_restricted
ENSMUSG00000014329	non-TRA	Aire_regulated	not_restricted
ENSMUSG00000014349	non-TRA	not_Aire_regulated	not_restricted
ENSMUSG00000014351	Aire-regulated TRA	Aire_regulated	restricted
ENSMUSG00000014353	non-TRA	not_Aire_regulated	not_restricted
ENSMUSG00000014355	non-TRA	not_Aire_regulated	not_restricted
ENSMUSG00000014361	non-TRA	Aire_regulated	not_restricted
ENSMUSG00000014402	non-TRA	not_Aire_regulated	not_restricted
ENSMUSG00000014418	non-TRA	not_Aire_regulated	not_restricted
ENSMUSG00000014426	non-TRA	not_Aire_regulated	not_restricted
ENSMUSG00000014444	non-TRA	not_Aire_regulated	not_restricted
ENSMUSG00000014453	non-Aire TRA	not_Aire_regulated	restricted
ENSMUSG00000014470	non-TRA	not_Aire_regulated	not_restricted
ENSMUSG00000014496	non-TRA	not_Aire_regulated	not_restricted
ENSMUSG00000014498	non-TRA	not_Aire_regulated	not_restricted
ENSMUSG00000014503	non-Aire TRA	not_Aire_regulated	restricted
ENSMUSG00000014504	non-TRA	not_Aire_regulated	not_restricted
ENSMUSG00000014529	non-Aire TRA	not_Aire_regulated	restricted
ENSMUSG00000014542	Aire-regulated TRA	Aire_regulated	restricted
ENSMUSG00000014543	non-Aire TRA	not_Aire_regulated	restricted
ENSMUSG00000014547	non-TRA	not_Aire_regulated	not_restricted
ENSMUSG00000014550	non-TRA	not_Aire_regulated	not_restricted
ENSMUSG00000014551	non-TRA	not_Aire_regulated	not_restricted
ENSMUSG00000014554	non-TRA	not_Aire_regulated	not_restricted
ENSMUSG00000014592	non-TRA	not_Aire_regulated	not_restricted
ENSMUSG00000014599	non-TRA	not_Aire_regulated	not_restricted
ENSMUSG00000014601	non-TRA	not_Aire_regulated	not_restricted
ENSMUSG00000014602	non-Aire TRA	not_Aire_regulated	restricted
ENSMUSG00000014603	Aire-regulated TRA	Aire_regulated	restricted
ENSMUSG00000014606	non-TRA	not_Aire_regulated	not_restricted
ENSMUSG00000014609	non-Aire TRA	not_Aire_regulated	restricted
ENSMUSG00000014633	non-TRA	not_Aire_regulated	not_restricted
ENSMUSG00000014668	non-TRA	not_Aire_regulated	not_restricted
ENSMUSG00000014686	Aire-regulated TRA	Aire_regulated	restricted
ENSMUSG00000014704	non-TRA	not_Aire_regulated	not_restricted
ENSMUSG00000014725	Aire-regulated TRA	Aire_regulated	restricted
ENSMUSG00000014747	non-Aire TRA	not_Aire_regulated	restricted
ENSMUSG00000014748	non-TRA	not_Aire_regulated	not_restricted
ENSMUSG00000014763	non-TRA	not_Aire_regulated	not_restricted
ENSMUSG00000014767	non-TRA	not_Aire_regulated	not_restricted
ENSMUSG00000014769	non-TRA	not_Aire_regulated	not_restricted
ENSMUSG00000014771	non-TRA	not_Aire_regulated	not_restricted
ENSMUSG00000014773	non-TRA	not_Aire_regulated	not_restricted
ENSMUSG00000014776	non-TRA	not_Aire_regulated	not_restricted
ENSMUSG00000014778	non-TRA	not_Aire_regulated	not_restricted
ENSMUSG00000014782	Aire-regulated TRA	Aire_regulated	restricted
ENSMUSG00000014786	non-TRA	not_Aire_regulated	not_restricted
ENSMUSG00000014791	non-TRA	not_Aire_regulated	not_restricted
ENSMUSG00000014813	non-TRA	not_Aire_regulated	not_restricted
ENSMUSG00000014837	non-TRA	not_Aire_regulated	not_restricted
ENSMUSG00000014846	non-TRA	Aire_regulated	not_restricted
ENSMUSG00000014850	non-TRA	not_Aire_regulated	not_restricted
ENSMUSG00000014852	non-Aire TRA	not_Aire_regulated	restricted
ENSMUSG00000014856	non-TRA	not_Aire_regulated	not_restricted
ENSMUSG00000014859	non-TRA	not_Aire_regulated	not_restricted
ENSMUSG00000014867	non-TRA	not_Aire_regulated	not_restricted
ENSMUSG00000014873	non-TRA	not_Aire_regulated	not_restricted
ENSMUSG00000014905	non-TRA	not_Aire_regulated	not_restricted
ENSMUSG00000014907	non-TRA	not_Aire_regulated	not_restricted
ENSMUSG00000014932	non-TRA	not_Aire_regulated	not_restricted
ENSMUSG00000014956	non-TRA	not_Aire_regulated	not_restricted
ENSMUSG00000014959	non-TRA	not_Aire_regulated	not_restricted
ENSMUSG00000014980	non-TRA	not_Aire_regulated	not_restricted
ENSMUSG00000015001	Aire-regulated TRA	Aire_regulated	restricted
ENSMUSG00000015002	non-TRA	not_Aire_regulated	not_restricted
ENSMUSG00000015013	non-TRA	not_Aire_regulated	not_restricted
ENSMUSG00000015016	non-TRA	not_Aire_regulated	not_restricted
ENSMUSG00000015023	non-TRA	not_Aire_regulated	not_restricted
ENSMUSG00000015027	non-TRA	not_Aire_regulated	not_restricted
ENSMUSG00000015053	non-TRA	Aire_regulated	not_restricted
ENSMUSG00000015083	non-Aire TRA	not_Aire_regulated	restricted
ENSMUSG00000015085	non-TRA	not_Aire_regulated	not_restricted
ENSMUSG00000015087	non-TRA	not_Aire_regulated	not_restricted
ENSMUSG00000015090	non-TRA	Aire_regulated	not_restricted
ENSMUSG00000015092	non-TRA	not_Aire_regulated	not_restricted
ENSMUSG00000015093	non-TRA	Aire_regulated	not_restricted
ENSMUSG00000015094	non-TRA	not_Aire_regulated	not_restricted
ENSMUSG00000015095	non-TRA	not_Aire_regulated	not_restricted
ENSMUSG00000015112	non-TRA	not_Aire_regulated	not_restricted
ENSMUSG00000015120	non-TRA	not_Aire_regulated	not_restricted
ENSMUSG00000015126	non-TRA	not_Aire_regulated	not_restricted
ENSMUSG00000015127	non-TRA	not_Aire_regulated	not_restricted
ENSMUSG00000015133	non-TRA	not_Aire_regulated	not_restricted
ENSMUSG00000015134	non-TRA	not_Aire_regulated	not_restricted
ENSMUSG00000015143	non-TRA	not_Aire_regulated	not_restricted
ENSMUSG00000015149	non-TRA	not_Aire_regulated	not_restricted
ENSMUSG00000015165	non-TRA	not_Aire_regulated	not_restricted
ENSMUSG00000015176	non-TRA	not_Aire_regulated	not_restricted
ENSMUSG00000015189	non-TRA	not_Aire_regulated	not_restricted
ENSMUSG00000015202	non-TRA	not_Aire_regulated	not_restricted
ENSMUSG00000015214	non-TRA	not_Aire_regulated	not_restricted
ENSMUSG00000015217	non-TRA	not_Aire_regulated	not_restricted
ENSMUSG00000015222	non-TRA	not_Aire_regulated	not_restricted
ENSMUSG00000015224	non-TRA	not_Aire_regulated	not_restricted
ENSMUSG00000015242	Aire-regulated TRA	Aire_regulated	restricted
ENSMUSG00000015243	non-TRA	not_Aire_regulated	not_restricted
ENSMUSG00000015247	non-TRA	not_Aire_regulated	not_restricted
ENSMUSG00000015289	non-TRA	not_Aire_regulated	not_restricted
ENSMUSG00000015290	non-TRA	not_Aire_regulated	not_restricted
ENSMUSG00000015291	non-TRA	not_Aire_regulated	not_restricted
ENSMUSG00000015305	non-TRA	not_Aire_regulated	not_restricted
ENSMUSG00000015312	non-TRA	not_Aire_regulated	not_restricted
ENSMUSG00000015314	non-Aire TRA	not_Aire_regulated	restricted
ENSMUSG00000015316	non-Aire TRA	not_Aire_regulated	restricted
ENSMUSG00000015335	non-TRA	not_Aire_regulated	not_restricted
ENSMUSG00000015337	non-TRA	not_Aire_regulated	not_restricted
ENSMUSG00000015340	non-Aire TRA	not_Aire_regulated	restricted
ENSMUSG00000015341	non-TRA	not_Aire_regulated	not_restricted
ENSMUSG00000015342	non-TRA	not_Aire_regulated	not_restricted
ENSMUSG00000015354	non-Aire TRA	not_Aire_regulated	restricted
ENSMUSG00000015355	non-TRA	not_Aire_regulated	not_restricted
ENSMUSG00000015357	non-TRA	not_Aire_regulated	not_restricted
ENSMUSG00000015363	non-TRA	not_Aire_regulated	not_restricted
ENSMUSG00000015365	Aire-regulated TRA	Aire_regulated	restricted
ENSMUSG00000015377	non-TRA	not_Aire_regulated	not_restricted
ENSMUSG00000015396	non-TRA	not_Aire_regulated	not_restricted
ENSMUSG00000015401	Aire-regulated TRA	Aire_regulated	restricted
ENSMUSG00000015405	Aire-regulated TRA	Aire_regulated	restricted
ENSMUSG00000015437	Aire-regulated TRA	Aire_regulated	restricted
ENSMUSG00000015441	Aire-regulated TRA	Aire_regulated	restricted
ENSMUSG00000015443	Aire-regulated TRA	Aire_regulated	restricted
ENSMUSG00000015452	non-Aire TRA	not_Aire_regulated	restricted
ENSMUSG00000015461	non-TRA	not_Aire_regulated	not_restricted
ENSMUSG00000015467	non-TRA	not_Aire_regulated	not_restricted
ENSMUSG00000015468	non-TRA	not_Aire_regulated	not_restricted
ENSMUSG00000015474	non-TRA	not_Aire_regulated	not_restricted
ENSMUSG00000015476	non-Aire TRA	not_Aire_regulated	restricted
ENSMUSG00000015478	non-TRA	not_Aire_regulated	not_restricted
ENSMUSG00000015484	non-Aire TRA	not_Aire_regulated	restricted
ENSMUSG00000015488	non-TRA	not_Aire_regulated	not_restricted
ENSMUSG00000015501	non-TRA	not_Aire_regulated	not_restricted
ENSMUSG00000015519	non-Aire TRA	not_Aire_regulated	restricted
ENSMUSG00000015522	non-TRA	not_Aire_regulated	not_restricted
ENSMUSG00000015533	non-TRA	not_Aire_regulated	not_restricted
ENSMUSG00000015536	non-TRA	not_Aire_regulated	not_restricted
ENSMUSG00000015542	non-TRA	not_Aire_regulated	not_restricted
ENSMUSG00000015568	non-TRA	not_Aire_regulated	not_restricted
ENSMUSG00000015575	non-TRA	not_Aire_regulated	not_restricted
ENSMUSG00000015579	non-Aire TRA	not_Aire_regulated	restricted
ENSMUSG00000015597	non-TRA	not_Aire_regulated	not_restricted
ENSMUSG00000015599	Aire-regulated TRA	Aire_regulated	restricted
ENSMUSG00000015605	non-TRA	not_Aire_regulated	not_restricted
ENSMUSG00000015619	non-TRA	not_Aire_regulated	not_restricted
ENSMUSG00000015627	Aire-regulated TRA	Aire_regulated	restricted
ENSMUSG00000015647	non-TRA	not_Aire_regulated	not_restricted
ENSMUSG00000015652	non-TRA	Aire_regulated	not_restricted
ENSMUSG00000015653	non-TRA	Aire_regulated	not_restricted
ENSMUSG00000015656	non-TRA	not_Aire_regulated	not_restricted
ENSMUSG00000015659	non-TRA	not_Aire_regulated	not_restricted
ENSMUSG00000015665	non-Aire TRA	not_Aire_regulated	restricted
ENSMUSG00000015668	non-TRA	not_Aire_regulated	not_restricted
ENSMUSG00000015671	non-TRA	not_Aire_regulated	not_restricted
ENSMUSG00000015672	non-TRA	not_Aire_regulated	not_restricted
ENSMUSG00000015697	non-TRA	not_Aire_regulated	not_restricted
ENSMUSG00000015702	non-TRA	not_Aire_regulated	not_restricted
ENSMUSG00000015709	non-TRA	not_Aire_regulated	not_restricted
ENSMUSG00000015711	non-TRA	not_Aire_regulated	not_restricted
ENSMUSG00000015714	non-TRA	not_Aire_regulated	not_restricted
ENSMUSG00000015721	Aire-regulated TRA	Aire_regulated	restricted
ENSMUSG00000015733	non-TRA	not_Aire_regulated	not_restricted
ENSMUSG00000015745	non-TRA	not_Aire_regulated	not_restricted
ENSMUSG00000015747	non-TRA	not_Aire_regulated	not_restricted
ENSMUSG00000015748	non-TRA	not_Aire_regulated	not_restricted
ENSMUSG00000015749	non-TRA	not_Aire_regulated	not_restricted
ENSMUSG00000015750	non-TRA	not_Aire_regulated	not_restricted
ENSMUSG00000015755	non-TRA	not_Aire_regulated	not_restricted
ENSMUSG00000015757	non-TRA	not_Aire_regulated	not_restricted
ENSMUSG00000015759	non-TRA	not_Aire_regulated	not_restricted
ENSMUSG00000015766	non-TRA	not_Aire_regulated	not_restricted
ENSMUSG00000015776	non-TRA	not_Aire_regulated	not_restricted
ENSMUSG00000015787	Aire-regulated TRA	Aire_regulated	restricted
ENSMUSG00000015790	non-TRA	not_Aire_regulated	not_restricted
ENSMUSG00000015804	non-TRA	not_Aire_regulated	not_restricted
ENSMUSG00000015806	non-TRA	not_Aire_regulated	not_restricted
ENSMUSG00000015812	non-TRA	Aire_regulated	not_restricted
ENSMUSG00000015829	Aire-regulated TRA	Aire_regulated	restricted
ENSMUSG00000015837	non-TRA	not_Aire_regulated	not_restricted
ENSMUSG00000015839	non-TRA	not_Aire_regulated	not_restricted
ENSMUSG00000015843	non-Aire TRA	not_Aire_regulated	restricted
ENSMUSG00000015846	non-TRA	not_Aire_regulated	not_restricted
ENSMUSG00000015850	non-TRA	Aire_regulated	not_restricted
ENSMUSG00000015852	non-TRA	not_Aire_regulated	not_restricted
ENSMUSG00000015854	Aire-regulated TRA	Aire_regulated	restricted
ENSMUSG00000015869	non-TRA	not_Aire_regulated	not_restricted
ENSMUSG00000015879	Aire-regulated TRA	Aire_regulated	restricted
ENSMUSG00000015880	non-Aire TRA	not_Aire_regulated	restricted
ENSMUSG00000015882	non-TRA	not_Aire_regulated	not_restricted
ENSMUSG00000015889	non-TRA	not_Aire_regulated	not_restricted
ENSMUSG00000015890	non-Aire TRA	not_Aire_regulated	restricted
ENSMUSG00000015932	non-TRA	not_Aire_regulated	not_restricted
ENSMUSG00000015937	non-TRA	not_Aire_regulated	not_restricted
ENSMUSG00000015942	non-TRA	not_Aire_regulated	not_restricted
ENSMUSG00000015943	non-TRA	not_Aire_regulated	not_restricted
ENSMUSG00000015944	non-TRA	not_Aire_regulated	not_restricted
ENSMUSG00000015947	non-TRA	Aire_regulated	not_restricted
ENSMUSG00000015950	non-TRA	not_Aire_regulated	not_restricted
ENSMUSG00000015957	non-TRA	not_Aire_regulated	not_restricted
ENSMUSG00000015961	non-TRA	not_Aire_regulated	not_restricted
ENSMUSG00000015962	Aire-regulated TRA	Aire_regulated	restricted
ENSMUSG00000015966	non-TRA	not_Aire_regulated	not_restricted
ENSMUSG00000015968	non-TRA	not_Aire_regulated	not_restricted
ENSMUSG00000015970	non-TRA	not_Aire_regulated	not_restricted
ENSMUSG00000015971	non-TRA	not_Aire_regulated	not_restricted
ENSMUSG00000015980	non-Aire TRA	not_Aire_regulated	restricted
ENSMUSG00000015981	non-TRA	Aire_regulated	not_restricted
ENSMUSG00000015994	non-TRA	not_Aire_regulated	not_restricted
ENSMUSG00000016018	non-TRA	not_Aire_regulated	not_restricted
ENSMUSG00000016024	non-TRA	Aire_regulated	not_restricted
ENSMUSG00000016028	non-Aire TRA	not_Aire_regulated	restricted
ENSMUSG00000016087	non-TRA	not_Aire_regulated	not_restricted
ENSMUSG00000016128	non-TRA	not_Aire_regulated	not_restricted
ENSMUSG00000016150	non-Aire TRA	not_Aire_regulated	restricted
ENSMUSG00000016179	Aire-regulated TRA	Aire_regulated	restricted
ENSMUSG00000016181	non-TRA	not_Aire_regulated	not_restricted
ENSMUSG00000016194	non-TRA	not_Aire_regulated	not_restricted
ENSMUSG00000016200	non-TRA	not_Aire_regulated	not_restricted
ENSMUSG00000016206	non-TRA	not_Aire_regulated	not_restricted
ENSMUSG00000016239	non-Aire TRA	not_Aire_regulated	restricted
ENSMUSG00000016252	non-TRA	not_Aire_regulated	not_restricted
ENSMUSG00000016253	non-TRA	not_Aire_regulated	not_restricted
ENSMUSG00000016255	non-Aire TRA	not_Aire_regulated	restricted
ENSMUSG00000016256	non-TRA	not_Aire_regulated	not_restricted
ENSMUSG00000016257	non-TRA	not_Aire_regulated	not_restricted
ENSMUSG00000016262	non-TRA	not_Aire_regulated	not_restricted
ENSMUSG00000016283	non-Aire TRA	not_Aire_regulated	restricted
ENSMUSG00000016308	non-TRA	not_Aire_regulated	not_restricted
ENSMUSG00000016319	non-TRA	not_Aire_regulated	not_restricted
ENSMUSG00000016327	Aire-regulated TRA	Aire_regulated	restricted
ENSMUSG00000016344	non-TRA	not_Aire_regulated	not_restricted
ENSMUSG00000016346	non-Aire TRA	not_Aire_regulated	restricted
ENSMUSG00000016349	non-Aire TRA	not_Aire_regulated	restricted
ENSMUSG00000016356	non-TRA	Aire_regulated	not_restricted
ENSMUSG00000016382	non-TRA	not_Aire_regulated	not_restricted
ENSMUSG00000016386	non-TRA	Aire_regulated	not_restricted
ENSMUSG00000016409	non-TRA	not_Aire_regulated	not_restricted
ENSMUSG00000016427	non-TRA	not_Aire_regulated	not_restricted
ENSMUSG00000016458	Aire-regulated TRA	Aire_regulated	restricted
ENSMUSG00000016477	non-TRA	not_Aire_regulated	not_restricted
ENSMUSG00000016481	non-TRA	not_Aire_regulated	not_restricted
ENSMUSG00000016487	non-TRA	not_Aire_regulated	not_restricted
ENSMUSG00000016493	non-Aire TRA	not_Aire_regulated	restricted
ENSMUSG00000016494	non-TRA	Aire_regulated	not_restricted
ENSMUSG00000016495	non-TRA	not_Aire_regulated	not_restricted
ENSMUSG00000016496	non-TRA	not_Aire_regulated	not_restricted
ENSMUSG00000016498	non-Aire TRA	not_Aire_regulated	restricted
ENSMUSG00000016503	non-TRA	not_Aire_regulated	not_restricted
ENSMUSG00000016510	non-TRA	not_Aire_regulated	not_restricted
ENSMUSG00000016520	non-TRA	not_Aire_regulated	not_restricted
ENSMUSG00000016524	Aire-regulated TRA	Aire_regulated	restricted
ENSMUSG00000016526	non-Aire TRA	not_Aire_regulated	restricted
ENSMUSG00000016528	non-TRA	not_Aire_regulated	not_restricted
ENSMUSG00000016529	non-Aire TRA	not_Aire_regulated	restricted
ENSMUSG00000016534	non-TRA	not_Aire_regulated	not_restricted
ENSMUSG00000016541	non-TRA	not_Aire_regulated	not_restricted
ENSMUSG00000016552	non-TRA	not_Aire_regulated	not_restricted
ENSMUSG00000016554	non-TRA	not_Aire_regulated	not_restricted
ENSMUSG00000016559	non-TRA	not_Aire_regulated	not_restricted
ENSMUSG00000016619	non-TRA	not_Aire_regulated	not_restricted
ENSMUSG00000016624	non-TRA	not_Aire_regulated	not_restricted
ENSMUSG00000016626	Aire-regulated TRA	Aire_regulated	restricted
ENSMUSG00000016637	non-TRA	not_Aire_regulated	not_restricted
ENSMUSG00000016664	non-TRA	not_Aire_regulated	not_restricted
ENSMUSG00000016756	non-TRA	not_Aire_regulated	not_restricted
ENSMUSG00000016757	non-TRA	not_Aire_regulated	not_restricted
ENSMUSG00000016758	non-TRA	not_Aire_regulated	not_restricted
ENSMUSG00000016763	non-TRA	Aire_regulated	not_restricted
ENSMUSG00000016831	non-TRA	not_Aire_regulated	not_restricted
ENSMUSG00000016833	non-TRA	not_Aire_regulated	not_restricted
ENSMUSG00000016918	non-TRA	not_Aire_regulated	not_restricted
ENSMUSG00000016921	non-TRA	not_Aire_regulated	not_restricted
ENSMUSG00000016933	non-TRA	not_Aire_regulated	not_restricted
ENSMUSG00000016940	non-TRA	not_Aire_regulated	not_restricted
ENSMUSG00000016942	Aire-regulated TRA	Aire_regulated	restricted
ENSMUSG00000016946	non-TRA	not_Aire_regulated	not_restricted
ENSMUSG00000016982	non-Aire TRA	not_Aire_regulated	restricted
ENSMUSG00000016984	non-TRA	not_Aire_regulated	not_restricted
ENSMUSG00000016995	Aire-regulated TRA	Aire_regulated	restricted
ENSMUSG00000016998	Aire-regulated TRA	Aire_regulated	restricted
ENSMUSG00000017000	Aire-regulated TRA	Aire_regulated	restricted
ENSMUSG00000017002	non-TRA	Aire_regulated	not_restricted
ENSMUSG00000017003	Aire-regulated TRA	Aire_regulated	restricted
ENSMUSG00000017004	Aire-regulated TRA	Aire_regulated	restricted
ENSMUSG00000017007	non-Aire TRA	not_Aire_regulated	restricted
ENSMUSG00000017009	non-TRA	not_Aire_regulated	not_restricted
ENSMUSG00000017049	Aire-regulated TRA	Aire_regulated	restricted
ENSMUSG00000017057	non-TRA	not_Aire_regulated	not_restricted
ENSMUSG00000017064	Aire-regulated TRA	Aire_regulated	restricted
ENSMUSG00000017119	non-TRA	not_Aire_regulated	not_restricted
ENSMUSG00000017132	non-TRA	not_Aire_regulated	not_restricted
ENSMUSG00000017144	non-TRA	Aire_regulated	not_restricted
ENSMUSG00000017146	non-Aire TRA	not_Aire_regulated	restricted
ENSMUSG00000017165	Aire-regulated TRA	Aire_regulated	restricted
ENSMUSG00000017167	non-Aire TRA	not_Aire_regulated	restricted
ENSMUSG00000017176	non-TRA	not_Aire_regulated	not_restricted
ENSMUSG00000017188	non-TRA	not_Aire_regulated	not_restricted
ENSMUSG00000017195	non-Aire TRA	not_Aire_regulated	restricted
ENSMUSG00000017204	Aire-regulated TRA	Aire_regulated	restricted
ENSMUSG00000017210	non-TRA	not_Aire_regulated	not_restricted
ENSMUSG00000017211	Aire-regulated TRA	Aire_regulated	restricted
ENSMUSG00000017221	non-TRA	not_Aire_regulated	not_restricted
ENSMUSG00000017264	non-TRA	not_Aire_regulated	not_restricted
ENSMUSG00000017286	non-TRA	not_Aire_regulated	not_restricted
ENSMUSG00000017288	non-TRA	not_Aire_regulated	not_restricted
ENSMUSG00000017291	non-TRA	not_Aire_regulated	not_restricted
ENSMUSG00000017299	non-TRA	not_Aire_regulated	not_restricted
ENSMUSG00000017300	Aire-regulated TRA	Aire_regulated	restricted
ENSMUSG00000017307	non-TRA	not_Aire_regulated	not_restricted
ENSMUSG00000017309	non-TRA	Aire_regulated	not_restricted
ENSMUSG00000017310	Aire-regulated TRA	Aire_regulated	restricted
ENSMUSG00000017311	Aire-regulated TRA	Aire_regulated	restricted
ENSMUSG00000017314	non-TRA	Aire_regulated	not_restricted
ENSMUSG00000017316	Aire-regulated TRA	Aire_regulated	restricted
ENSMUSG00000017344	Aire-regulated TRA	Aire_regulated	restricted
ENSMUSG00000017376	non-TRA	not_Aire_regulated	not_restricted
ENSMUSG00000017386	non-TRA	not_Aire_regulated	not_restricted
ENSMUSG00000017390	non-Aire TRA	not_Aire_regulated	restricted
ENSMUSG00000017400	Aire-regulated TRA	Aire_regulated	restricted
ENSMUSG00000017404	non-TRA	not_Aire_regulated	not_restricted
ENSMUSG00000017405	non-TRA	not_Aire_regulated	not_restricted
ENSMUSG00000017412	Aire-regulated TRA	Aire_regulated	restricted
ENSMUSG00000017417	non-TRA	not_Aire_regulated	not_restricted
ENSMUSG00000017418	non-TRA	not_Aire_regulated	not_restricted
ENSMUSG00000017421	non-TRA	not_Aire_regulated	not_restricted
ENSMUSG00000017428	non-TRA	not_Aire_regulated	not_restricted
ENSMUSG00000017446	non-TRA	Aire_regulated	not_restricted
ENSMUSG00000017453	non-Aire TRA	not_Aire_regulated	restricted
ENSMUSG00000017466	non-TRA	Aire_regulated	not_restricted
ENSMUSG00000017478	non-TRA	not_Aire_regulated	not_restricted
ENSMUSG00000017485	non-TRA	not_Aire_regulated	not_restricted
ENSMUSG00000017491	non-TRA	Aire_regulated	not_restricted
ENSMUSG00000017493	non-TRA	not_Aire_regulated	not_restricted
ENSMUSG00000017499	non-Aire TRA	not_Aire_regulated	restricted
ENSMUSG00000017548	non-TRA	not_Aire_regulated	not_restricted
ENSMUSG00000017550	non-TRA	not_Aire_regulated	not_restricted
ENSMUSG00000017561	non-TRA	not_Aire_regulated	not_restricted
ENSMUSG00000017588	Aire-regulated TRA	Aire_regulated	restricted
ENSMUSG00000017607	non-TRA	Aire_regulated	not_restricted
ENSMUSG00000017615	non-TRA	not_Aire_regulated	not_restricted
ENSMUSG00000017631	non-TRA	not_Aire_regulated	not_restricted
ENSMUSG00000017639	non-TRA	not_Aire_regulated	not_restricted
ENSMUSG00000017652	non-TRA	not_Aire_regulated	not_restricted
ENSMUSG00000017664	non-TRA	not_Aire_regulated	not_restricted
ENSMUSG00000017667	non-TRA	not_Aire_regulated	not_restricted
ENSMUSG00000017670	non-TRA	not_Aire_regulated	not_restricted
ENSMUSG00000017677	non-TRA	not_Aire_regulated	not_restricted
ENSMUSG00000017679	non-TRA	not_Aire_regulated	not_restricted
ENSMUSG00000017686	non-TRA	not_Aire_regulated	not_restricted
ENSMUSG00000017688	non-Aire TRA	not_Aire_regulated	restricted
ENSMUSG00000017692	non-TRA	not_Aire_regulated	not_restricted
ENSMUSG00000017697	non-Aire TRA	not_Aire_regulated	restricted
ENSMUSG00000017707	non-TRA	not_Aire_regulated	not_restricted
ENSMUSG00000017713	non-TRA	not_Aire_regulated	not_restricted
ENSMUSG00000017715	non-TRA	not_Aire_regulated	not_restricted
ENSMUSG00000017716	non-TRA	not_Aire_regulated	not_restricted
ENSMUSG00000017718	non-TRA	not_Aire_regulated	not_restricted
ENSMUSG00000017720	non-Aire TRA	not_Aire_regulated	restricted
ENSMUSG00000017721	non-TRA	not_Aire_regulated	not_restricted
ENSMUSG00000017723	non-TRA	not_Aire_regulated	not_restricted
ENSMUSG00000017724	Aire-regulated TRA	Aire_regulated	restricted
ENSMUSG00000017733	non-Aire TRA	not_Aire_regulated	restricted
ENSMUSG00000017734	non-TRA	not_Aire_regulated	not_restricted
ENSMUSG00000017737	non-TRA	not_Aire_regulated	not_restricted
ENSMUSG00000017740	Aire-regulated TRA	Aire_regulated	restricted
ENSMUSG00000017747	non-TRA	not_Aire_regulated	not_restricted
ENSMUSG00000017754	non-TRA	not_Aire_regulated	not_restricted
ENSMUSG00000017756	non-TRA	not_Aire_regulated	not_restricted
ENSMUSG00000017760	non-TRA	not_Aire_regulated	not_restricted
ENSMUSG00000017764	non-TRA	not_Aire_regulated	not_restricted
ENSMUSG00000017765	non-TRA	not_Aire_regulated	not_restricted
ENSMUSG00000017767	non-Aire TRA	not_Aire_regulated	restricted
ENSMUSG00000017774	non-TRA	not_Aire_regulated	not_restricted
ENSMUSG00000017776	non-TRA	not_Aire_regulated	not_restricted
ENSMUSG00000017778	non-TRA	not_Aire_regulated	not_restricted
ENSMUSG00000017781	non-TRA	not_Aire_regulated	not_restricted
ENSMUSG00000017801	non-TRA	not_Aire_regulated	not_restricted
ENSMUSG00000017802	non-TRA	not_Aire_regulated	not_restricted
ENSMUSG00000017817	non-TRA	Aire_regulated	not_restricted
ENSMUSG00000017830	non-TRA	not_Aire_regulated	not_restricted
ENSMUSG00000017831	non-TRA	not_Aire_regulated	not_restricted
ENSMUSG00000017832	non-Aire TRA	not_Aire_regulated	restricted
ENSMUSG00000017837	non-TRA	not_Aire_regulated	not_restricted
ENSMUSG00000017843	non-TRA	not_Aire_regulated	not_restricted
ENSMUSG00000017858	non-TRA	not_Aire_regulated	not_restricted
ENSMUSG00000017861	non-TRA	not_Aire_regulated	not_restricted
ENSMUSG00000017868	Aire-regulated TRA	Aire_regulated	restricted
ENSMUSG00000017897	non-TRA	not_Aire_regulated	not_restricted
ENSMUSG00000017922	Aire-regulated TRA	Aire_regulated	restricted
ENSMUSG00000017929	non-TRA	not_Aire_regulated	not_restricted
ENSMUSG00000017943	non-Aire TRA	not_Aire_regulated	restricted
ENSMUSG00000017950	Aire-regulated TRA	Aire_regulated	restricted
ENSMUSG00000017969	non-TRA	Aire_regulated	not_restricted
ENSMUSG00000017978	non-TRA	not_Aire_regulated	not_restricted
ENSMUSG00000017999	non-TRA	not_Aire_regulated	not_restricted
ENSMUSG00000018001	non-TRA	not_Aire_regulated	not_restricted
ENSMUSG00000018008	non-TRA	Aire_regulated	not_restricted
ENSMUSG00000018012	non-TRA	not_Aire_regulated	not_restricted
ENSMUSG00000018040	non-TRA	not_Aire_regulated	not_restricted
ENSMUSG00000018042	non-TRA	not_Aire_regulated	not_restricted
ENSMUSG00000018068	non-TRA	not_Aire_regulated	not_restricted
ENSMUSG00000018076	non-TRA	not_Aire_regulated	not_restricted
ENSMUSG00000018102	non-TRA	not_Aire_regulated	not_restricted
ENSMUSG00000018126	Aire-regulated TRA	Aire_regulated	restricted
ENSMUSG00000018143	non-TRA	not_Aire_regulated	not_restricted
ENSMUSG00000018160	non-TRA	not_Aire_regulated	not_restricted
ENSMUSG00000018166	non-TRA	not_Aire_regulated	not_restricted
ENSMUSG00000018167	non-TRA	not_Aire_regulated	not_restricted
ENSMUSG00000018168	non-Aire TRA	not_Aire_regulated	restricted
ENSMUSG00000018169	non-TRA	not_Aire_regulated	not_restricted
ENSMUSG00000018171	non-TRA	not_Aire_regulated	not_restricted
ENSMUSG00000018189	non-TRA	not_Aire_regulated	not_restricted
ENSMUSG00000018196	non-TRA	not_Aire_regulated	not_restricted
ENSMUSG00000018199	non-TRA	not_Aire_regulated	not_restricted
ENSMUSG00000018209	non-TRA	not_Aire_regulated	not_restricted
ENSMUSG00000018211	Aire-regulated TRA	Aire_regulated	restricted
ENSMUSG00000018217	non-TRA	Aire_regulated	not_restricted
ENSMUSG00000018238	non-Aire TRA	not_Aire_regulated	restricted
ENSMUSG00000018239	non-TRA	not_Aire_regulated	not_restricted
ENSMUSG00000018259	Aire-regulated TRA	Aire_regulated	restricted
ENSMUSG00000018263	Aire-regulated TRA	Aire_regulated	restricted
ENSMUSG00000018286	non-TRA	not_Aire_regulated	not_restricted
ENSMUSG00000018287	non-TRA	not_Aire_regulated	not_restricted
ENSMUSG00000018293	non-TRA	not_Aire_regulated	not_restricted
ENSMUSG00000018322	non-TRA	not_Aire_regulated	not_restricted
ENSMUSG00000018326	non-TRA	not_Aire_regulated	not_restricted
ENSMUSG00000018334	non-TRA	not_Aire_regulated	not_restricted
ENSMUSG00000018339	non-TRA	Aire_regulated	not_restricted
ENSMUSG00000018340	non-TRA	not_Aire_regulated	not_restricted
ENSMUSG00000018341	Aire-regulated TRA	Aire_regulated	restricted
ENSMUSG00000018347	non-TRA	not_Aire_regulated	not_restricted
ENSMUSG00000018362	non-TRA	not_Aire_regulated	not_restricted
ENSMUSG00000018363	non-TRA	not_Aire_regulated	not_restricted
ENSMUSG00000018372	non-TRA	not_Aire_regulated	not_restricted
ENSMUSG00000018377	non-TRA	not_Aire_regulated	not_restricted
ENSMUSG00000018378	non-TRA	not_Aire_regulated	not_restricted
ENSMUSG00000018379	non-TRA	not_Aire_regulated	not_restricted
ENSMUSG00000018381	non-TRA	not_Aire_regulated	not_restricted
ENSMUSG00000018387	non-TRA	not_Aire_regulated	not_restricted
ENSMUSG00000018395	non-TRA	not_Aire_regulated	not_restricted
ENSMUSG00000018398	non-TRA	not_Aire_regulated	not_restricted
ENSMUSG00000018401	non-TRA	not_Aire_regulated	not_restricted
ENSMUSG00000018405	non-TRA	not_Aire_regulated	not_restricted
ENSMUSG00000018411	non-TRA	Aire_regulated	not_restricted
ENSMUSG00000018412	non-TRA	not_Aire_regulated	not_restricted
ENSMUSG00000018415	non-TRA	not_Aire_regulated	not_restricted
ENSMUSG00000018417	non-TRA	not_Aire_regulated	not_restricted
ENSMUSG00000018425	non-TRA	not_Aire_regulated	not_restricted
ENSMUSG00000018427	non-TRA	not_Aire_regulated	not_restricted
ENSMUSG00000018428	non-TRA	not_Aire_regulated	not_restricted
ENSMUSG00000018433	non-TRA	not_Aire_regulated	not_restricted
ENSMUSG00000018442	non-TRA	not_Aire_regulated	not_restricted
ENSMUSG00000018446	non-TRA	not_Aire_regulated	not_restricted
ENSMUSG00000018449	non-TRA	not_Aire_regulated	not_restricted
ENSMUSG00000018459	Aire-regulated TRA	Aire_regulated	restricted
ENSMUSG00000018470	Aire-regulated TRA	Aire_regulated	restricted
ENSMUSG00000018474	non-TRA	not_Aire_regulated	not_restricted
ENSMUSG00000018476	non-TRA	not_Aire_regulated	not_restricted
ENSMUSG00000018479	Aire-regulated TRA	Aire_regulated	restricted
ENSMUSG00000018481	non-TRA	not_Aire_regulated	not_restricted
ENSMUSG00000018486	Aire-regulated TRA	Aire_regulated	restricted
ENSMUSG00000018500	non-TRA	not_Aire_regulated	not_restricted
ENSMUSG00000018501	non-TRA	not_Aire_regulated	not_restricted
ENSMUSG00000018507	non-TRA	not_Aire_regulated	not_restricted
ENSMUSG00000018509	non-TRA	not_Aire_regulated	not_restricted
ENSMUSG00000018537	non-TRA	not_Aire_regulated	not_restricted
ENSMUSG00000018541	non-TRA	not_Aire_regulated	not_restricted
ENSMUSG00000018543	non-Aire TRA	not_Aire_regulated	restricted
ENSMUSG00000018547	non-TRA	not_Aire_regulated	not_restricted
ENSMUSG00000018548	non-TRA	not_Aire_regulated	not_restricted
ENSMUSG00000018554	non-Aire TRA	not_Aire_regulated	restricted
ENSMUSG00000018559	non-TRA	not_Aire_regulated	not_restricted
ENSMUSG00000018565	non-TRA	not_Aire_regulated	not_restricted
ENSMUSG00000018566	non-TRA	not_Aire_regulated	not_restricted
ENSMUSG00000018567	non-TRA	not_Aire_regulated	not_restricted
ENSMUSG00000018569	non-TRA	not_Aire_regulated	not_restricted
ENSMUSG00000018570	non-Aire TRA	not_Aire_regulated	restricted
ENSMUSG00000018572	non-TRA	not_Aire_regulated	not_restricted
ENSMUSG00000018574	non-TRA	not_Aire_regulated	not_restricted
ENSMUSG00000018581	Aire-regulated TRA	Aire_regulated	restricted
ENSMUSG00000018583	non-TRA	not_Aire_regulated	not_restricted
ENSMUSG00000018585	non-TRA	not_Aire_regulated	not_restricted
ENSMUSG00000018589	Aire-regulated TRA	Aire_regulated	restricted
ENSMUSG00000018593	non-TRA	Aire_regulated	not_restricted
ENSMUSG00000018595	Aire-regulated TRA	Aire_regulated	restricted
ENSMUSG00000018599	non-TRA	not_Aire_regulated	not_restricted
ENSMUSG00000018604	non-TRA	not_Aire_regulated	not_restricted
ENSMUSG00000018620	Aire-regulated TRA	Aire_regulated	restricted
ENSMUSG00000018623	Aire-regulated TRA	Aire_regulated	restricted
ENSMUSG00000018634	Aire-regulated TRA	Aire_regulated	restricted
ENSMUSG00000018648	non-TRA	Aire_regulated	not_restricted
ENSMUSG00000018651	non-TRA	not_Aire_regulated	not_restricted
ENSMUSG00000018654	non-TRA	not_Aire_regulated	not_restricted
ENSMUSG00000018656	Aire-regulated TRA	Aire_regulated	restricted
ENSMUSG00000018659	non-TRA	not_Aire_regulated	not_restricted
ENSMUSG00000018661	non-TRA	not_Aire_regulated	not_restricted
ENSMUSG00000018666	non-TRA	not_Aire_regulated	not_restricted
ENSMUSG00000018669	non-TRA	not_Aire_regulated	not_restricted
ENSMUSG00000018672	non-TRA	not_Aire_regulated	not_restricted
ENSMUSG00000018677	non-TRA	not_Aire_regulated	not_restricted
ENSMUSG00000018678	non-TRA	not_Aire_regulated	not_restricted
ENSMUSG00000018697	non-TRA	not_Aire_regulated	not_restricted
ENSMUSG00000018698	Aire-regulated TRA	Aire_regulated	restricted
ENSMUSG00000018707	non-TRA	not_Aire_regulated	not_restricted
ENSMUSG00000018727	non-Aire TRA	not_Aire_regulated	restricted
ENSMUSG00000018733	non-TRA	not_Aire_regulated	not_restricted
ENSMUSG00000018736	non-TRA	not_Aire_regulated	not_restricted
ENSMUSG00000018740	non-TRA	not_Aire_regulated	not_restricted
ENSMUSG00000018750	non-TRA	not_Aire_regulated	not_restricted
ENSMUSG00000018752	non-TRA	not_Aire_regulated	not_restricted
ENSMUSG00000018761	non-TRA	not_Aire_regulated	not_restricted
ENSMUSG00000018765	non-TRA	not_Aire_regulated	not_restricted
ENSMUSG00000018770	non-TRA	not_Aire_regulated	not_restricted
ENSMUSG00000018774	non-TRA	not_Aire_regulated	not_restricted
ENSMUSG00000018776	non-Aire TRA	not_Aire_regulated	restricted
ENSMUSG00000018796	non-TRA	not_Aire_regulated	not_restricted
ENSMUSG00000018800	non-TRA	not_Aire_regulated	not_restricted
ENSMUSG00000018809	non-TRA	not_Aire_regulated	not_restricted
ENSMUSG00000018819	non-TRA	not_Aire_regulated	not_restricted
ENSMUSG00000018820	non-TRA	not_Aire_regulated	not_restricted
ENSMUSG00000018821	non-TRA	not_Aire_regulated	not_restricted
ENSMUSG00000018822	non-TRA	not_Aire_regulated	not_restricted
ENSMUSG00000018830	non-TRA	not_Aire_regulated	not_restricted
ENSMUSG00000018841	non-TRA	not_Aire_regulated	not_restricted
ENSMUSG00000018844	non-Aire TRA	not_Aire_regulated	restricted
ENSMUSG00000018845	Aire-regulated TRA	Aire_regulated	restricted
ENSMUSG00000018846	non-TRA	not_Aire_regulated	not_restricted
ENSMUSG00000018848	non-TRA	not_Aire_regulated	not_restricted
ENSMUSG00000018849	non-TRA	not_Aire_regulated	not_restricted
[truncated: 20,041 more rows]

## Sheet: Supp. Table 3
Ensembl_transcript_id	mTT_transcript_id	gene_id	gene_name	Salmon_TPM	SUPPA_eventtype
ENSMUST00000000049	ENSMUST00000000049_N1	ENSMUSG00000000049	Apoh	2.55731
ENSMUST00000000219	ENSMUST00000000219_N1	ENSMUSG00000000214	Th	2.64672	AF
ENSMUST00000000266	ENSMUST00000000266_N3	ENSMUSG00000026535	Ifi202b	7.08652
ENSMUST00000000365	ENSMUST00000000365_N8	ENSMUSG00000000355	Mcts1	2.8921	A3
ENSMUST00000000707	ENSMUST00000000707_N1	ENSMUSG00000000693	Loxl3	7.63438
ENSMUST00000000808	ENSMUST00000000808_N1	ENSMUSG00000000791	Il12rb1	2.31	A3
ENSMUST00000000940	ENSMUST00000000940_N5	ENSMUSG00000000916	Nsun5	2.7704
ENSMUST00000000985	ENSMUST00000000985_N5	ENSMUSG00000000959	Oxa1l	4.76041	A3
ENSMUST00000001115	ENSMUST00000001115_N4	ENSMUSG00000074886	Grk6	0
ENSMUST00000001497	ENSMUST00000001497_N1	ENSMUSG00000022219	Cideb	1.81124
ENSMUST00000001701	ENSMUST00000001701_N1	ENSMUSG00000001656	Hoxc11	8.94462	A5;AF
ENSMUST00000002073	ENSMUST00000002073_N3	ENSMUSG00000002020	Ltbp2	7.03701
ENSMUST00000002073	ENSMUST00000002073_N5	ENSMUSG00000002020	Ltbp2	14.8049	RI
ENSMUST00000002172	ENSMUST00000002172_N1	ENSMUSG00000002103	Acp2	2.87559
ENSMUST00000002298	ENSMUST00000002298_N6	ENSMUSG00000002228	Ppm1j	0	A5
ENSMUST00000002469	ENSMUST00000002469_N1	ENSMUSG00000002396	Ocel1	9.32633
ENSMUST00000002825	ENSMUST00000002825_N1	ENSMUSG00000002748	Baz1b	1.71451	A3
ENSMUST00000002926	ENSMUST00000002926_N4	ENSMUSG00000002847	Pla1a	20.8546	SE
ENSMUST00000003035	ENSMUST00000003035_N2	ENSMUSG00000030768	Disp1	0.857646	AF
ENSMUST00000003061	ENSMUST00000003061_N1	ENSMUSG00000002980	Bcam	8.30691
ENSMUST00000003442	ENSMUST00000003442_N3	ENSMUSG00000003352	Cacnb3	0.562896	RI
ENSMUST00000003655	ENSMUST00000003655_N2	ENSMUSG00000003559	As3mt	0	RI
ENSMUST00000003981	ENSMUST00000003981_N3	ENSMUSG00000003882	Il7r	4.0638	SE
ENSMUST00000003981	ENSMUST00000003981_N4	ENSMUSG00000003882	Il7r	0.675734
ENSMUST00000004156	ENSMUST00000004156_N1	ENSMUSG00000004054	Map3k11	0.895145	A5
ENSMUST00000004294	ENSMUST00000004294_N6	ENSMUSG00000004187	Kifc2	0	AF
ENSMUST00000004968	ENSMUST00000004968_N1	ENSMUSG00000004846	Plod3	4.13886
ENSMUST00000005218	ENSMUST00000005218_N1	ENSMUSG00000005087	Cd44	26.1709	SE
ENSMUST00000005504	ENSMUST00000005504_N1	ENSMUSG00000005371	Fbxo11	1.49883	A5;AF
ENSMUST00000005933	ENSMUST00000005933_N1	ENSMUSG00000038968	Klk1b16	0
ENSMUST00000006029	ENSMUST00000006029_N1	ENSMUSG00000078954	Arhgap8	18.7173	A5;SE
ENSMUST00000006221	ENSMUST00000006221_N2	ENSMUSG00000020128	Vps54	1.00717
ENSMUST00000006704	ENSMUST00000006704_N4	ENSMUSG00000006529	Itih1	0	RI
ENSMUST00000006786	ENSMUST00000006786_N3	ENSMUSG00000036110	Slc17a2	0
ENSMUST00000006956	ENSMUST00000006956_N2	ENSMUSG00000040026	Saa3	9.01263	RI
ENSMUST00000006956	ENSMUST00000006956_N1	ENSMUSG00000040026	Saa3	1.07735	AF
ENSMUST00000007046	ENSMUST00000007046_N11	ENSMUSG00000006850	Tmco6	3.93409	A5;RI
ENSMUST00000007161	ENSMUST00000007161_N1	ENSMUSG00000006948	Klk4	1.43984	RI
ENSMUST00000007423	ENSMUST00000007423_N5	ENSMUSG00000007279	Scube2	0.449283
ENSMUST00000008748	ENSMUST00000008748_N1	ENSMUSG00000008604	Ubqln4	4.18245
ENSMUST00000009120	ENSMUST00000009120_N2	ENSMUSG00000008976	Gabpa	0
ENSMUST00000009219	ENSMUST00000009219_N1	ENSMUSG00000009075	Cabp7	1.49271
ENSMUST00000010279	ENSMUST00000010279_N1	ENSMUSG00000074344	Tmigd3	0	A3
ENSMUST00000010279	ENSMUST00000010279_N2	ENSMUSG00000074344	Tmigd3	0	AF
ENSMUST00000011623	ENSMUST00000011623_N1	ENSMUSG00000002668	Dennd1c	4.07992
ENSMUST00000013755	ENSMUST00000013755_N2	ENSMUSG00000013611	Snx31	2.0904
ENSMUST00000013807	ENSMUST00000013807_N5	ENSMUSG00000013663	Pten	2.05027
ENSMUST00000014174	ENSMUST00000014174_N6	ENSMUSG00000014030	Pax5	0	AF
ENSMUST00000014686	ENSMUST00000014686_N2	ENSMUSG00000014542	Clec4f	1.2192
ENSMUST00000014753	ENSMUST00000014753_N7	ENSMUSG00000014609	Chrne	1.36e-06	RI;SE
ENSMUST00000014922	ENSMUST00000014922_N6	ENSMUSG00000014778	Fhod1	0	A3;RI
ENSMUST00000015277	ENSMUST00000015277_N3	ENSMUSG00000015133	Lrrk1	32.58
ENSMUST00000015581	ENSMUST00000015581_N2	ENSMUSG00000015437	Gzmb	0	AF
ENSMUST00000015585	ENSMUST00000015585_N3	ENSMUSG00000079186	Gzmc	0.975505
ENSMUST00000015800	ENSMUST00000015800_N3	ENSMUSG00000015656	Hspa8	485.369	AL;RI
ENSMUST00000016294	ENSMUST00000016294_N2	ENSMUSG00000016150	Tenm1	4.29348
ENSMUST00000016569	ENSMUST00000016569_N6	ENSMUSG00000034021	Pds5b	33.9805
ENSMUST00000016673	ENSMUST00000016673_N1	ENSMUSG00000016529	Il10	1.86349
ENSMUST00000016897	ENSMUST00000016897_N2	ENSMUSG00000022442	Ttll1	0.801178
ENSMUST00000016951	ENSMUST00000016951_N2	ENSMUSG00000051029	Serpinb1b	4.45238
ENSMUST00000017270	ENSMUST00000017270_N2	ENSMUSG00000053654	Krt42	7.87319	AF
ENSMUST00000017270	ENSMUST00000017270_N3	ENSMUSG00000053654	Krt42	6.92076
ENSMUST00000017270	ENSMUST00000017270_N1	ENSMUSG00000053654	Krt42	2.04482	AF
ENSMUST00000017799	ENSMUST00000017799_N2	ENSMUSG00000017652	Cd40	8.22723
ENSMUST00000018184	ENSMUST00000018184_N1	ENSMUSG00000018040	Rrp7a	8.03073
ENSMUST00000018645	ENSMUST00000018645_N23	ENSMUSG00000018501	Ncor1	0
ENSMUST00000018645	ENSMUST00000018645_N21	ENSMUSG00000018501	Ncor1	0
ENSMUST00000018755	ENSMUST00000018755_N1	ENSMUSG00000020388	Pdlim4	7.04274	A5;RI
ENSMUST00000019063	ENSMUST00000019063_N2	ENSMUSG00000018919	Tm4sf5	21.8231
ENSMUST00000019068	ENSMUST00000019068_N1	ENSMUSG00000018924	Alox15	0
ENSMUST00000019133	ENSMUST00000019133_N19	ENSMUSG00000057897	Camk2b	5.03037
ENSMUST00000019183	ENSMUST00000019183_N1	ENSMUSG00000019039	Dalrd3	0
ENSMUST00000019426	ENSMUST00000019426_N1	ENSMUSG00000001804	Dsg4	11.4274
ENSMUST00000019662	ENSMUST00000019662_N5	ENSMUSG00000019518	Ap4m1	3.09099
ENSMUST00000020040	ENSMUST00000020040_N1	ENSMUSG00000019890	Nts	1.14175
ENSMUST00000020064	ENSMUST00000020064_N1	ENSMUSG00000019909	Fam162b	2.19568
ENSMUST00000020157	ENSMUST00000020157_N1	ENSMUSG00000019979	Apaf1	4.01604
ENSMUST00000020255	ENSMUST00000020255_N6	ENSMUSG00000020062	Slc5a8	0
ENSMUST00000020400	ENSMUST00000020400_N1	ENSMUSG00000060780	Lrrtm1	1.10225
ENSMUST00000020400	ENSMUST00000020400_N2	ENSMUSG00000060780	Lrrtm1	1.42207	RI
ENSMUST00000020456	ENSMUST00000020456_N2	ENSMUSG00000020234	4930404N11Rik	0.95871
ENSMUST00000020649	ENSMUST00000020649_N3	ENSMUSG00000020380	Rad50	6.59755	RI
ENSMUST00000020830	ENSMUST00000020830_N1	ENSMUSG00000020522	Mfap3	5.11647
ENSMUST00000020962	ENSMUST00000020962_N1	ENSMUSG00000020634	Ubxn2a	9.35268
ENSMUST00000021052	ENSMUST00000021052_N2	ENSMUSG00000078619	Smarcd2	2.63635
ENSMUST00000021289	ENSMUST00000021289_N3	ENSMUSG00000049928	Glp2r	3.49544	MX
ENSMUST00000021289	ENSMUST00000021289_N4	ENSMUSG00000049928	Glp2r	0.967603	RI;SE
ENSMUST00000021289	ENSMUST00000021289_N5	ENSMUSG00000049928	Glp2r	2.99643	SE
ENSMUST00000021289	ENSMUST00000021289_N2	ENSMUSG00000049928	Glp2r	0.697928	AL;SE
ENSMUST00000021289	ENSMUST00000021289_N8	ENSMUSG00000049928	Glp2r	0.583156	A3
ENSMUST00000021289	ENSMUST00000021289_N6	ENSMUSG00000049928	Glp2r	2.24653	AL;SE
ENSMUST00000021523	ENSMUST00000021523_N8	ENSMUSG00000021103	Mnat1	2.69037	A5
ENSMUST00000021669	ENSMUST00000021669_N1	ENSMUSG00000021243	Fcf1	0.929042	A3
ENSMUST00000021806	ENSMUST00000021806_N3	ENSMUSG00000021376	Tpmt	4.65196
ENSMUST00000021806	ENSMUST00000021806_N4	ENSMUSG00000021376	Tpmt	4.24449	A5
ENSMUST00000021898	ENSMUST00000021898_N2	ENSMUSG00000021448	Shc3	1.36e-06	RI
ENSMUST00000022051	ENSMUST00000022051_N2	ENSMUSG00000021567	Nkd2	6.19394
ENSMUST00000022119	ENSMUST00000022119_N3	ENSMUSG00000021619	Atg10	8.59846
ENSMUST00000022186	ENSMUST00000022186_N2	ENSMUSG00000021679	S100z	2.84582	AF
ENSMUST00000022186	ENSMUST00000022186_N1	ENSMUSG00000021679	S100z	1.3927	AF
ENSMUST00000022245	ENSMUST00000022245_N1	ENSMUSG00000021731	Mrps30	0
ENSMUST00000022294	ENSMUST00000022294_N1	ENSMUSG00000021772	Nkiras1	1.74926	A3
ENSMUST00000022337	ENSMUST00000022337_N2	ENSMUSG00000021803	Cdhr1	1.76788	A5;RI
ENSMUST00000022450	ENSMUST00000022450_N7	ENSMUSG00000040651	Fam208a	1.56042
ENSMUST00000022470	ENSMUST00000022470_N3	ENSMUSG00000021911	Parg	21.9141
ENSMUST00000022499	ENSMUST00000022499_N1	ENSMUSG00000021932	Rnaseh2b	34.2003
ENSMUST00000022536	ENSMUST00000022536_N1	ENSMUSG00000021965	Ska3	5.79502
ENSMUST00000022566	ENSMUST00000022566_N6	ENSMUSG00000021990	Spata13	0.649846	A3
ENSMUST00000022574	ENSMUST00000022574_N3	ENSMUSG00000021997	Lrrc63	0	AL
ENSMUST00000022678	ENSMUST00000022678_N1	ENSMUSG00000022085	Pebp4	1.74837
ENSMUST00000022793	ENSMUST00000022793_N12	ENSMUSG00000022185	Acin1	30.4842
ENSMUST00000022793	ENSMUST00000022793_N9	ENSMUSG00000022185	Acin1	5.92846	A5;RI
ENSMUST00000022976	ENSMUST00000022976_N4	ENSMUSG00000022350	Washc5	2.44698
ENSMUST00000023019	ENSMUST00000023019_N10	ENSMUSG00000022386	Trmu	3.06192
ENSMUST00000023019	ENSMUST00000023019_N9	ENSMUSG00000022386	Trmu	2.327	A3;RI
ENSMUST00000023140	ENSMUST00000023140_N1	ENSMUSG00000022496	Tnfrsf17	1.71404	SE
ENSMUST00000023146	ENSMUST00000023146_N5	ENSMUSG00000022503	Nubp1	5.14243	RI
ENSMUST00000023147	ENSMUST00000023147_N8	ENSMUSG00000022504	Ciita	12.2136
ENSMUST00000023147	ENSMUST00000023147_N6	ENSMUSG00000022504	Ciita	29.5821
ENSMUST00000023161	ENSMUST00000023161_N1	ENSMUSG00000022519	Srl	0.505989
ENSMUST00000023165	ENSMUST00000023165_N5	ENSMUSG00000022521	Crebbp	14.0348
ENSMUST00000023260	ENSMUST00000023260_N2	ENSMUSG00000022595	Lypd2	0.95306	RI;SE
ENSMUST00000023283	ENSMUST00000023283_N3	ENSMUSG00000022614	Lmf2	0.959283
ENSMUST00000023330	ENSMUST00000023330_N1	ENSMUSG00000022652	Morc1	5.00395
ENSMUST00000023362	ENSMUST00000023362_N2	ENSMUSG00000022681	Ntan1	4.61562	A5
ENSMUST00000023435	ENSMUST00000023435_N3	ENSMUSG00000022754	Tmem45a	15.1355	AF;SE
ENSMUST00000023501	ENSMUST00000023501_N1	ENSMUSG00000022805	Maats1	2.00894
ENSMUST00000023566	ENSMUST00000023566_N1	ENSMUSG00000022857	Tmprss15	1.5059
ENSMUST00000023598	ENSMUST00000023598_N2	ENSMUSG00000022881	Rfc4	9.94982	A5;SE
ENSMUST00000023619	ENSMUST00000023619_N1	ENSMUSG00000022902	Stfa2	3.17613
ENSMUST00000023673	ENSMUST00000023673_N3	ENSMUSG00000022952	Runx1	1.003
ENSMUST00000023712	ENSMUST00000023712_N1	ENSMUSG00000064201	Krt2	4.57296	AF
ENSMUST00000023720	ENSMUST00000023720_N1	ENSMUSG00000044294	Krt84	6.17091
ENSMUST00000023741	ENSMUST00000023741_N11	ENSMUSG00000048154	Kmt2d	4.89e-05	RI
ENSMUST00000023861	ENSMUST00000023861_N1	ENSMUSG00000058017	Serpinb3d	6.28497
ENSMUST00000023952	ENSMUST00000023952_N2	ENSMUSG00000049382	Krt8	0.289843	A3
ENSMUST00000023994	ENSMUST00000023994_N2	ENSMUSG00000023224	Serping1	9.72602	SE
ENSMUST00000024044	ENSMUST00000024044_N3	ENSMUSG00000023274	Cd4	5.7676	AF
ENSMUST00000024044	ENSMUST00000024044_N5	ENSMUSG00000023274	Cd4	4.80425
ENSMUST00000024099	ENSMUST00000024099_N1	ENSMUSG00000023328	Ache	0	A5;RI
ENSMUST00000024099	ENSMUST00000024099_N10	ENSMUSG00000023328	Ache	10.7134	A5;RI
ENSMUST00000024595	ENSMUST00000024595_N2	ENSMUSG00000023828	Slc22a3	1.20514	A5;AF
ENSMUST00000024595	ENSMUST00000024595_N3	ENSMUSG00000023828	Slc22a3	3.44331	AF
ENSMUST00000024657	ENSMUST00000024657_N1	ENSMUSG00000023883	Phf10	32.581
ENSMUST00000024702	ENSMUST00000024702_N2	ENSMUSG00000023909	Paqr4	0
ENSMUST00000024811	ENSMUST00000024811_N1	ENSMUSG00000024014	Pim1	0
ENSMUST00000024930	ENSMUST00000024930_N1	ENSMUSG00000024118	Tedc2	0
ENSMUST00000024939	ENSMUST00000024939_N2	ENSMUSG00000024125	Sbpl	4.75062
ENSMUST00000024939	ENSMUST00000024939_N1	ENSMUSG00000024125	Sbpl	2.6606
ENSMUST00000025000	ENSMUST00000025000_N1	ENSMUSG00000024172	St6gal2	0	SE
ENSMUST00000025034	ENSMUST00000025034_N2	ENSMUSG00000057789	Bak1	45.1668
ENSMUST00000025034	ENSMUST00000025034_N4	ENSMUSG00000057789	Bak1	9.64903
ENSMUST00000025036	ENSMUST00000025036_N14	ENSMUSG00000024201	Kdm4b	0	A3;RI
ENSMUST00000025181	ENSMUST00000025181_N1	ENSMUSG00000061232	H2-K1	0
ENSMUST00000025322	ENSMUST00000025322_N1	ENSMUSG00000024448	H2-M10.1	1.71891	A3
ENSMUST00000025483	ENSMUST00000025483_N2	ENSMUSG00000024587	Nars	0	A3
ENSMUST00000025520	ENSMUST00000025520_N14	ENSMUSG00000052026	Slc6a7	6.52907	A3;RI;SE
ENSMUST00000025520	ENSMUST00000025520_N16	ENSMUSG00000052026	Slc6a7	4.16704	A3;A5;RI
ENSMUST00000025520	ENSMUST00000025520_N17	ENSMUSG00000052026	Slc6a7	0	A5;RI
ENSMUST00000025520	ENSMUST00000025520_N19	ENSMUSG00000052026	Slc6a7	6.35919	A3;RI;SE
ENSMUST00000025520	ENSMUST00000025520_N20	ENSMUSG00000052026	Slc6a7	8.49124	A5;RI
ENSMUST00000025520	ENSMUST00000025520_N3	ENSMUSG00000052026	Slc6a7	5.80511	A3;RI;SE
ENSMUST00000025520	ENSMUST00000025520_N7	ENSMUSG00000052026	Slc6a7	0	A3;RI;SE
ENSMUST00000025520	ENSMUST00000025520_N12	ENSMUSG00000052026	Slc6a7	11.6921	A3;RI;SE
ENSMUST00000025521	ENSMUST00000025521_N1	ENSMUSG00000024619	Cdx1	62.0175	SE
ENSMUST00000025568	ENSMUST00000025568_N7	ENSMUSG00000024666	Tmem138	2.91411	A5;SE
ENSMUST00000025568	ENSMUST00000025568_N10	ENSMUSG00000024666	Tmem138	0	A5;SE
ENSMUST00000025645	ENSMUST00000025645_N1	ENSMUSG00000024736	Tmem132a	5.7497	A3
ENSMUST00000025646	ENSMUST00000025646_N3	ENSMUSG00000024737	Slc15a3	2.21645	RI
ENSMUST00000025681	ENSMUST00000025681_N1	ENSMUSG00000024769	Cdc42bpg	1.48791	RI
ENSMUST00000025719	ENSMUST00000025719_N1	ENSMUSG00000024806	Mlana	1.78992
ENSMUST00000025830	ENSMUST00000025830_N5	ENSMUSG00000024897	Apba1	13.324	A3;AF
ENSMUST00000025993	ENSMUST00000025993_N6	ENSMUSG00000025020	Slit1	1.40978	SE
ENSMUST00000025993	ENSMUST00000025993_N9	ENSMUSG00000025020	Slit1	0
ENSMUST00000026128	ENSMUST00000026128_N2	ENSMUSG00000025135	Anapc11	18.7134
ENSMUST00000026156	ENSMUST00000026156_N6	ENSMUSG00000025158	Rfng	10.2175
ENSMUST00000026156	ENSMUST00000026156_N7	ENSMUSG00000025158	Rfng	0	RI
ENSMUST00000026499	ENSMUST00000026499_N1	ENSMUSG00000025433	Crisp3	9.5956
ENSMUST00000026500	ENSMUST00000026500_N3	ENSMUSG00000025432	Avil	4.03597
ENSMUST00000026537	ENSMUST00000026537_N2	ENSMUSG00000025464	Paox	3.9524
ENSMUST00000026537	ENSMUST00000026537_N3	ENSMUSG00000025464	Paox	0
ENSMUST00000026994	ENSMUST00000026994_N4	ENSMUSG00000025876	Unc5a	0	A3
ENSMUST00000027131	ENSMUST00000027131_N6	ENSMUSG00000025986	Slc39a10	5.53336	AF
ENSMUST00000027287	ENSMUST00000027287_N9	ENSMUSG00000026113	Inpp4a	0
ENSMUST00000027393	ENSMUST00000027393_N2	ENSMUSG00000026196	Bard1	2.32558
ENSMUST00000027503	ENSMUST00000027503_N6	ENSMUSG00000026281	Dtymk	23.0899	A5
ENSMUST00000027559	ENSMUST00000027559_N2	ENSMUSG00000026321	Tnfrsf11a	15.0541	A5;AF
ENSMUST00000027559	ENSMUST00000027559_N4	ENSMUSG00000026321	Tnfrsf11a	8.67454
ENSMUST00000027566	ENSMUST00000027566_N1	ENSMUSG00000026327	Serpinb11	39.3137	AF
ENSMUST00000027775	ENSMUST00000027775_N3	ENSMUSG00000026495	Efcab2	0.198415
ENSMUST00000027929	ENSMUST00000027929_N4	ENSMUSG00000026620	Mark1	0	A3
ENSMUST00000027956	ENSMUST00000027956_N2	ENSMUSG00000026646	Suv39h2	1.95813	A5;AF;SE
ENSMUST00000028024	ENSMUST00000028024_N1	ENSMUSG00000026700	Tnfsf4	3.13479
ENSMUST00000028045	ENSMUST00000028045_N3	ENSMUSG00000026712	Mrc1	64.8278
ENSMUST00000028223	ENSMUST00000028223_N3	ENSMUSG00000026866	Kynu	1.82498	A5
ENSMUST00000028225	ENSMUST00000028225_N2	ENSMUSG00000026869	Psmd5	0.598479
ENSMUST00000028237	ENSMUST00000028237_N9	ENSMUSG00000057110	Cntrl	2.40312	RI
ENSMUST00000028243	ENSMUST00000028243_N2	ENSMUSG00000026882	4930568D16Rik	4.48246	SE
ENSMUST00000028243	ENSMUST00000028243_N1	ENSMUSG00000026882	4930568D16Rik	3.1807
ENSMUST00000028259	ENSMUST00000028259_N1	ENSMUSG00000026896	Ifih1	4.05601
ENSMUST00000028304	ENSMUST00000028304_N1	ENSMUSG00000026936	Lcn3	0.993991	AF;RI
ENSMUST00000028304	ENSMUST00000028304_N2	ENSMUSG00000026936	Lcn3	3.6406	AF
ENSMUST00000028304	ENSMUST00000028304_N3	ENSMUSG00000026936	Lcn3	15.0201
ENSMUST00000028341	ENSMUST00000028341_N2	ENSMUSG00000026965	Anapc2	1.86507
ENSMUST00000028466	ENSMUST00000028466_N2	ENSMUSG00000027072	Prg3	44.8937
ENSMUST00000028522	ENSMUST00000028522_N8	ENSMUSG00000027111	Itga6	0
ENSMUST00000028650	ENSMUST00000028650_N4	ENSMUSG00000027222	Pex16	1.50144
ENSMUST00000028696	ENSMUST00000028696_N3	ENSMUSG00000002109	Ddb2	3.78053
ENSMUST00000028696	ENSMUST00000028696_N8	ENSMUSG00000002109	Ddb2	2.21681	SE
ENSMUST00000028721	ENSMUST00000028721_N2	ENSMUSG00000053675	Tgm5	17.8666
ENSMUST00000028888	ENSMUST00000028888_N1	ENSMUSG00000027403	Tgm6	1.87887	RI
ENSMUST00000028983	ENSMUST00000028983_N3	ENSMUSG00000027481	Bpifb2	4.831
ENSMUST00000029043	ENSMUST00000029043_N1	ENSMUSG00000027530	Fabp12	2.41554
ENSMUST00000029087	ENSMUST00000029087_N1	ENSMUSG00000049401	Ogfr	16.5811	A3;RI
ENSMUST00000029087	ENSMUST00000029087_N10	ENSMUSG00000049401	Ogfr	4.93809	A3;RI
ENSMUST00000029087	ENSMUST00000029087_N9	ENSMUSG00000049401	Ogfr	0	A5;SE
ENSMUST00000029087	ENSMUST00000029087_N13	ENSMUSG00000049401	Ogfr	0	A5;RI
ENSMUST00000029106	ENSMUST00000029106_N2	ENSMUSG00000027583	Zbtb46	14.3072	SE
ENSMUST00000029345	ENSMUST00000029345_N1	ENSMUSG00000027776	Il12a	2.76623	A5
ENSMUST00000029367	ENSMUST00000029367_N1	ENSMUSG00000027792	Bche	12.0999
ENSMUST00000029423	ENSMUST00000029423_N1	ENSMUSG00000027834	Serpini1	28.8258
ENSMUST00000029469	ENSMUST00000029469_N1	ENSMUSG00000027876	Reg4	3.0193
ENSMUST00000029520	ENSMUST00000029520_N3	ENSMUSG00000027912	Lce1m	0.531759
ENSMUST00000029562	ENSMUST00000029562_N1	ENSMUSG00000027950	Chrnb2	2.47558
ENSMUST00000029650	ENSMUST00000029650_N1	ENSMUSG00000028016	Ints12	3.09268
ENSMUST00000029785	ENSMUST00000029785_N1	ENSMUSG00000028139	Riiad1	0.239131	A3;A5;SE
ENSMUST00000029785	ENSMUST00000029785_N7	ENSMUSG00000028139	Riiad1	1.03603	A5
ENSMUST00000029815	ENSMUST00000029815_N3	ENSMUSG00000028165	Cisd2	7.15396
ENSMUST00000029919	ENSMUST00000029919_N1	ENSMUSG00000028255	Clca1	0
ENSMUST00000030051	ENSMUST00000030051_N1	ENSMUSG00000028367	Txn1	0.82069	A3
ENSMUST00000030181	ENSMUST00000030181_N1	ENSMUSG00000028461	Ccdc107	50.9439	AF
ENSMUST00000030339	ENSMUST00000030339_N1	ENSMUSG00000028602	Tnfrsf8	8.33977	SE
ENSMUST00000030360	ENSMUST00000030360_N2	ENSMUSG00000028617	Lrrc42	3.14959	A3
ENSMUST00000030360	ENSMUST00000030360_N1	ENSMUSG00000028617	Lrrc42	5.89347
ENSMUST00000030508	ENSMUST00000030508_N1	ENSMUSG00000028736	Pax7	0.789316
ENSMUST00000030508	ENSMUST00000030508_N2	ENSMUSG00000028736	Pax7	3.88409
ENSMUST00000030561	ENSMUST00000030561_N2	ENSMUSG00000028777	Gnat3	7.91379
ENSMUST00000030561	ENSMUST00000030561_N1	ENSMUSG00000028777	Gnat3	16.7573
ENSMUST00000030642	ENSMUST00000030642_N3	ENSMUSG00000028837	Psmb2	2.09731	SE
ENSMUST00000030691	ENSMUST00000030691_N2	ENSMUSG00000061601	Pclo	2.0418
ENSMUST00000030949	ENSMUST00000030949_N3	ENSMUSG00000029072	Tas1r3	2.24806	A5
ENSMUST00000030991	ENSMUST00000030991_N2	ENSMUSG00000059866	Tnip2	9.18303	SE
ENSMUST00000031222	ENSMUST00000031222_N1	ENSMUSG00000029286	Enam	2.14746	A3
ENSMUST00000031534	ENSMUST00000031534_N7	ENSMUSG00000029554	Mad1l1	2.02324
ENSMUST00000031535	ENSMUST00000031535_N2	ENSMUSG00000029556	Hnf1a	75.5161	A3
ENSMUST00000031535	ENSMUST00000031535_N4	ENSMUSG00000029556	Hnf1a	13.9019	AF
ENSMUST00000031727	ENSMUST00000031727_N10	ENSMUSG00000029714	Gigyf1	2.00139	RI
ENSMUST00000031866	ENSMUST00000031866_N2	ENSMUSG00000029840	Mtpn	105.254	A3
ENSMUST00000031876	ENSMUST00000031876_N2	ENSMUSG00000029848	Stra8	0.798884	A5
ENSMUST00000031876	ENSMUST00000031876_N3	ENSMUSG00000029848	Stra8	2.24144	A5
ENSMUST00000031876	ENSMUST00000031876_N6	ENSMUSG00000029848	Stra8	1.79657	A5
ENSMUST00000031876	ENSMUST00000031876_N5	ENSMUSG00000029848	Stra8	8.94434
ENSMUST00000032207	ENSMUST00000032207_N3	ENSMUSG00000030114	Klrg1	1.79673	SE
ENSMUST00000032207	ENSMUST00000032207_N4	ENSMUSG00000030114	Klrg1	3.89424
ENSMUST00000032260	ENSMUST00000032260_N2	ENSMUSG00000030157	Clec2d	1.02211	A5
ENSMUST00000032433	ENSMUST00000032433_N1	ENSMUSG00000030292	Smco2	5.68183
ENSMUST00000032473	ENSMUST00000032473_N1	ENSMUSG00000054072	Iigp1	30.3972	A3;RI
ENSMUST00000032473	ENSMUST00000032473_N2	ENSMUSG00000054072	Iigp1	4.56494	A3;A5;RI;SE
ENSMUST00000032473	ENSMUST00000032473_N3	ENSMUSG00000054072	Iigp1	11.7356
ENSMUST00000032667	ENSMUST00000032667_N5	ENSMUSG00000030474	Siglece	1.83221
ENSMUST00000032719	ENSMUST00000032719_N7	ENSMUSG00000020181	Nav3	1.68554	AF
ENSMUST00000032732	ENSMUST00000032732_N6	ENSMUSG00000030519	Apba2	30.8546
ENSMUST00000032779	ENSMUST00000032779_N1	ENSMUSG00000030560	Ctsc	1.76539	SE
ENSMUST00000032811	ENSMUST00000032811_N11	ENSMUSG00000030589	Rasgrp4	0	RI
ENSMUST00000032824	ENSMUST00000032824_N4	ENSMUSG00000030603	Psmc4	4.93149
ENSMUST00000032824	ENSMUST00000032824_N6	ENSMUSG00000030603	Psmc4	1.2976	SE
ENSMUST00000032824	ENSMUST00000032824_N7	ENSMUSG00000030603	Psmc4	51.5656
ENSMUST00000032824	ENSMUST00000032824_N1	ENSMUSG00000030603	Psmc4	13.7567	SE
ENSMUST00000032824	ENSMUST00000032824_N8	ENSMUSG00000030603	Psmc4	16.7571	A5
ENSMUST00000032882	ENSMUST00000032882_N1	ENSMUSG00000030647	Ndufc2	1.18271
ENSMUST00000033006	ENSMUST00000033006_N3	ENSMUSG00000030750	Nsmce1	201.036
ENSMUST00000033099	ENSMUST00000033099_N1	ENSMUSG00000030827	Fgf21	5.60228
ENSMUST00000033179	ENSMUST00000033179_N3	ENSMUSG00000030888	Rrp8	0.772285	RI
ENSMUST00000033602	ENSMUST00000033602_N1	ENSMUSG00000031250	Tnmd	46.5327	SE
ENSMUST00000033621	ENSMUST00000033621_N1	ENSMUSG00000031266	Gla	7.34086	RI
ENSMUST00000033625	ENSMUST00000033625_N1	ENSMUSG00000031270	4930513O06Rik	1.24035
ENSMUST00000033646	ENSMUST00000033646_N2	ENSMUSG00000031289	Il13ra2	2.67045
ENSMUST00000033727	ENSMUST00000033727_N9	ENSMUSG00000031360	Ctps2	9.16364
ENSMUST00000033854	ENSMUST00000033854_N1	ENSMUSG00000031471	Defb8	2.25444
ENSMUST00000033952	ENSMUST00000033952_N3	ENSMUSG00000031548	Sfrp1	2.0133
ENSMUST00000034058	ENSMUST00000034058_N1	ENSMUSG00000031641	Cbr4	2.22971	A3
ENSMUST00000034133	ENSMUST00000034133_N1	ENSMUSG00000031698	Mylk3	0
ENSMUST00000034133	ENSMUST00000034133_N4	ENSMUSG00000031698	Mylk3	12.8903	A5
ENSMUST00000034173	ENSMUST00000034173_N1	ENSMUSG00000061959	Ces1e	2.62221
ENSMUST00000034349	ENSMUST00000034349_N1	ENSMUSG00000031878	Nae1	0	RI
ENSMUST00000034487	ENSMUST00000034487_N1	ENSMUSG00000018620	Mmp20	0.939375
ENSMUST00000034513	ENSMUST00000034513_N2	ENSMUSG00000032015	Pou2f3	2.85187	AF
ENSMUST00000034554	ENSMUST00000034554_N4	ENSMUSG00000032053	Pou2af1	4.87041	SE
ENSMUST00000034620	ENSMUST00000034620_N1	ENSMUSG00000032110	Acrv1	1.14652	AF
ENSMUST00000034630	ENSMUST00000034630_N1	ENSMUSG00000032118	Fez1	1.45973	AF
ENSMUST00000034739	ENSMUST00000034739_N2	ENSMUSG00000032217	Rnf111	0
ENSMUST00000034803	ENSMUST00000034803_N3	ENSMUSG00000032264	Zw10	3.06604	A3;A5;RI
ENSMUST00000035065	ENSMUST00000035065_N1	ENSMUSG00000032487	Ptgs2	1.78791
ENSMUST00000035092	ENSMUST00000035092_N1	ENSMUSG00000032508	Myd88	2.70583
ENSMUST00000035112	ENSMUST00000035112_N8	ENSMUSG00000032525	Nktr	0	A3
ENSMUST00000035194	ENSMUST00000035194_N3	ENSMUSG00000032577	Mapkapk3	28.5191
ENSMUST00000035323	ENSMUST00000035323_N3	ENSMUSG00000008193	Spib	0
ENSMUST00000035372	ENSMUST00000035372_N1	ENSMUSG00000035951	Ascl3	1.09067	AF
ENSMUST00000035724	ENSMUST00000035724_N4	ENSMUSG00000039158	Akna	2.84124
ENSMUST00000035779	ENSMUST00000035779_N1	ENSMUSG00000032883	Acsl3	0	AF;SE
ENSMUST00000035780	ENSMUST00000035780_N4	ENSMUSG00000035069	Oma1	0	AF
ENSMUST00000035849	ENSMUST00000035849_N3	ENSMUSG00000033053	1700028P14Rik	7.43646	AF
ENSMUST00000035894	ENSMUST00000035894_N11	ENSMUSG00000020096	Tbata	48.1977
ENSMUST00000035894	ENSMUST00000035894_N8	ENSMUSG00000020096	Tbata	7.87988	A3;A5;AF
ENSMUST00000035894	ENSMUST00000035894_N14	ENSMUSG00000020096	Tbata	5.02664
ENSMUST00000035960	ENSMUST00000035960_N3	ENSMUSG00000035439	Haus8	2.09991
ENSMUST00000036044	ENSMUST00000036044_N2	ENSMUSG00000034163	Zfc3h1	1.43959	A5
ENSMUST00000036300	ENSMUST00000036300_N13	ENSMUSG00000045672	Col27a1	4.28018	A5;SE
ENSMUST00000036383	ENSMUST00000036383_N2	ENSMUSG00000042707	Dnali1	3.1607
ENSMUST00000036796	ENSMUST00000036796_N2	ENSMUSG00000036264	Fstl4	2.08945
ENSMUST00000036865	ENSMUST00000036865_N1	ENSMUSG00000039187	Fanci	2.6171
ENSMUST00000036876	ENSMUST00000036876_N1	ENSMUSG00000041735	Gm13178	2.34796
ENSMUST00000036934	ENSMUST00000036934_N8	ENSMUSG00000026950	Neb	5.99607	AF
ENSMUST00000037182	ENSMUST00000037182_N4	ENSMUSG00000037234	Hook3	27.4331
ENSMUST00000037205	ENSMUST00000037205_N1	ENSMUSG00000033429	Mcee	0.254572	AF
ENSMUST00000037218	ENSMUST00000037218_N2	ENSMUSG00000034209	Rasl10a	0	RI;SE
ENSMUST00000037330	ENSMUST00000037330_N2	ENSMUSG00000032968	Inha	1.32997
ENSMUST00000037491	ENSMUST00000037491_N4	ENSMUSG00000039109	F13a1	2.61987
ENSMUST00000037491	ENSMUST00000037491_N3	ENSMUSG00000039109	F13a1	4.00465
ENSMUST00000037541	ENSMUST00000037541_N1	ENSMUSG00000067597	Dgat2l6	0.295901
ENSMUST00000037820	ENSMUST00000037820_N1	ENSMUSG00000038422	Hdhd3	9.06997
ENSMUST00000037824	ENSMUST00000037824_N1	ENSMUSG00000033837	Foxh1	0.180412
ENSMUST00000037882	ENSMUST00000037882_N1	ENSMUSG00000034783	Cd207	0.434906
ENSMUST00000037901	ENSMUST00000037901_N12	ENSMUSG00000052387	Trpm3	0	RI
ENSMUST00000038104	ENSMUST00000038104_N3	ENSMUSG00000049658	Bdp1	1.01258
ENSMUST00000038382	ENSMUST00000038382_N5	ENSMUSG00000042686	Jph1	0
ENSMUST00000038424	ENSMUST00000038424_N1	ENSMUSG00000022498	Txndc11	12.2151
ENSMUST00000038523	ENSMUST00000038523_N3	ENSMUSG00000035620	Ric8b	2.72e-06	A5;AF;SE
ENSMUST00000038580	ENSMUST00000038580_N1	ENSMUSG00000016206	H2-M3	1.73313	A3;RI
ENSMUST00000038580	ENSMUST00000038580_N5	ENSMUSG00000016206	H2-M3	1.0862
ENSMUST00000038676	ENSMUST00000038676_N1	ENSMUSG00000036596	Cpz	7.73237
ENSMUST00000038831	ENSMUST00000038831_N2	ENSMUSG00000039307	Hexdc	1.55768
ENSMUST00000038844	ENSMUST00000038844_N2	ENSMUSG00000035186	Ubd	5.01012
ENSMUST00000038844	ENSMUST00000038844_N3	ENSMUSG00000035186	Ubd	10.6093	A5
ENSMUST00000038844	ENSMUST00000038844_N1	ENSMUSG00000035186	Ubd	1.0494
ENSMUST00000038890	ENSMUST00000038890_N1	ENSMUSG00000053641	Dennd4a	12.1724	AF
ENSMUST00000039476	ENSMUST00000039476_N9	ENSMUSG00000041977	Arhgef11	12.5709
ENSMUST00000039674	ENSMUST00000039674_N3	ENSMUSG00000035934	Pknox2	2.8395	AF
ENSMUST00000039726	ENSMUST00000039726_N2	ENSMUSG00000035868	Zfp983	4.724	A5;SE
ENSMUST00000039775	ENSMUST00000039775_N1	ENSMUSG00000036560	Lgi4	0	RI
ENSMUST00000039782	ENSMUST00000039782_N10	ENSMUSG00000057133	Chd6	0.983998
ENSMUST00000039990	ENSMUST00000039990_N1	ENSMUSG00000038168	P3h2	6.70466
ENSMUST00000040179	ENSMUST00000040179_N11	ENSMUSG00000012609	Ttll5	32.4892	AF
ENSMUST00000040179	ENSMUST00000040179_N12	ENSMUSG00000012609	Ttll5	4.74792	SE
ENSMUST00000040271	ENSMUST00000040271_N3	ENSMUSG00000037443	Cep85	44.3785	AF
ENSMUST00000040506	ENSMUST00000040506_N5	ENSMUSG00000036501	Fam13b	7.04675	SE
ENSMUST00000040506	ENSMUST00000040506_N4	ENSMUSG00000036501	Fam13b	14.0725	SE
ENSMUST00000040607	ENSMUST00000040607_N1	ENSMUSG00000034192	Lsm3	3.37112
ENSMUST00000040636	ENSMUST00000040636_N5	ENSMUSG00000040364	Sec1	1.02714	RI;SE
ENSMUST00000040655	ENSMUST00000040655_N2	ENSMUSG00000036594	H2-Aa	1.58053	SE
ENSMUST00000040655	ENSMUST00000040655_N5	ENSMUSG00000036594	H2-Aa	3.29641	A5;RI;SE
ENSMUST00000040655	ENSMUST00000040655_N6	ENSMUSG00000036594	H2-Aa	129.213
ENSMUST00000040655	ENSMUST00000040655_N1	ENSMUSG00000036594	H2-Aa	13.1844	A5;SE
ENSMUST00000040706	ENSMUST00000040706_N1	ENSMUSG00000038949	Cnst	12.0527
ENSMUST00000040790	ENSMUST00000040790_N10	ENSMUSG00000039738	Slx4	0	A5
ENSMUST00000040828	ENSMUST00000040828_N5	ENSMUSG00000073421	H2-Ab1	9.0372
ENSMUST00000040873	ENSMUST00000040873_N1	ENSMUSG00000037364	Srrt	0.846181	A5
ENSMUST00000040873	ENSMUST00000040873_N3	ENSMUSG00000037364	Srrt	1.0884	RI
ENSMUST00000040873	ENSMUST00000040873_N2	ENSMUSG00000037364	Srrt	3.55658
ENSMUST00000041126	ENSMUST00000041126_N2	ENSMUSG00000039086	Ss18l1	3.40432	A5
ENSMUST00000041163	ENSMUST00000041163_N1	ENSMUSG00000036961	Wnt8b	1.95146
ENSMUST00000041415	ENSMUST00000041415_N1	ENSMUSG00000037579	Kcnh3	0	AF
ENSMUST00000041415	ENSMUST00000041415_N4	ENSMUSG00000037579	Kcnh3	3.21172	A3;A5
ENSMUST00000041531	ENSMUST00000041531_N2	ENSMUSG00000037246	H2-M10.5	2.53936	A3
ENSMUST00000041531	ENSMUST00000041531_N1	ENSMUSG00000037246	H2-M10.5	1.48218	RI
ENSMUST00000041541	ENSMUST00000041541_N2	ENSMUSG00000053216	Btn2a2	1.37471	A5;RI
ENSMUST00000041662	ENSMUST00000041662_N1	ENSMUSG00000037334	H2-M1	0
ENSMUST00000041662	ENSMUST00000041662_N3	ENSMUSG00000037334	H2-M1	6.14207
ENSMUST00000041662	ENSMUST00000041662_N4	ENSMUSG00000037334	H2-M1	6.32926
ENSMUST00000041662	ENSMUST00000041662_N2	ENSMUSG00000037334	H2-M1	3.67807
ENSMUST00000041725	ENSMUST00000041725_N1	ENSMUSG00000036620	Mgat4b	8.70208
ENSMUST00000041852	ENSMUST00000041852_N1	ENSMUSG00000041671	Pyroxd1	4.6866	A5
ENSMUST00000041860	ENSMUST00000041860_N5	ENSMUSG00000035582	Gdpd4	2.41173
ENSMUST00000042057	ENSMUST00000042057_N5	ENSMUSG00000035621	Midn	12.132
ENSMUST00000042092	ENSMUST00000042092_N1	ENSMUSG00000039155	Cdh26	6.62331
ENSMUST00000042105	ENSMUST00000042105_N1	ENSMUSG00000040435	Ppp1r15a	58.3978
ENSMUST00000042190	ENSMUST00000042190_N1	ENSMUSG00000037705	Tecta	0.994566
ENSMUST00000042219	ENSMUST00000042219_N1	ENSMUSG00000033765	Calm4	1.59379
ENSMUST00000042322	ENSMUST00000042322_N1	ENSMUSG00000037801	Iqch	1.08461
ENSMUST00000042740	ENSMUST00000042740_N1	ENSMUSG00000004668	Abca13	1.78391
ENSMUST00000042740	ENSMUST00000042740_N5	ENSMUSG00000004668	Abca13	22.7404
ENSMUST00000042861	ENSMUST00000042861_N2	ENSMUSG00000039232	Stx11	0	SE
ENSMUST00000043148	ENSMUST00000043148_N1	ENSMUSG00000036402	Gng12	3.07899	AF
ENSMUST00000043317	ENSMUST00000043317_N5	ENSMUSG00000036764	Dnajc12	4.31748
ENSMUST00000043333	ENSMUST00000043333_N6	ENSMUSG00000048930	Tada3	8.38267
ENSMUST00000043400	ENSMUST00000043400_N11	ENSMUSG00000033508	Asprv1	3.43935	A5;RI;SE
ENSMUST00000043400	ENSMUST00000043400_N4	ENSMUSG00000033508	Asprv1	8.10891	A5;RI;SE
ENSMUST00000043400	ENSMUST00000043400_N5	ENSMUSG00000033508	Asprv1	11.0634	RI;SE
ENSMUST00000043400	ENSMUST00000043400_N10	ENSMUSG00000033508	Asprv1	0.828912	A3;SE
ENSMUST00000043400	ENSMUST00000043400_N7	ENSMUSG00000033508	Asprv1	12.0364	A5;SE
ENSMUST00000043400	ENSMUST00000043400_N8	ENSMUSG00000033508	Asprv1	10.6682	A3;SE
ENSMUST00000043400	ENSMUST00000043400_N9	ENSMUSG00000033508	Asprv1	19.2366	SE
ENSMUST00000043400	ENSMUST00000043400_N6	ENSMUSG00000033508	Asprv1	19.0039
ENSMUST00000043422	ENSMUST00000043422_N5	ENSMUSG00000038213	Tapbpl	0
ENSMUST00000043775	ENSMUST00000043775_N8	ENSMUSG00000038773	Kdm3b	3.20539	A3;A5;AF;RI
ENSMUST00000043881	ENSMUST00000043881_N2	ENSMUSG00000037608	Bclaf1	0	RI
ENSMUST00000044083	ENSMUST00000044083_N5	ENSMUSG00000021559	Dapk1	0
ENSMUST00000044123	ENSMUST00000044123_N2	ENSMUSG00000039079	Trhr2	1.74766
ENSMUST00000044190	ENSMUST00000044190_N8	ENSMUSG00000037375	Hhat	29.8217	AF
ENSMUST00000044190	ENSMUST00000044190_N1	ENSMUSG00000037375	Hhat	7.09066	A5;AF
ENSMUST00000044224	ENSMUST00000044224_N1	ENSMUSG00000032623	Oas1d	9.68912
ENSMUST00000044326	ENSMUST00000044326_N1	ENSMUSG00000039269	2300002M23Rik	1.83264
ENSMUST00000044492	ENSMUST00000044492_N2	ENSMUSG00000040407	Akap9	9.73891
ENSMUST00000044682	ENSMUST00000044682_N4	ENSMUSG00000034579	Pla2g3	4.6968
ENSMUST00000044684	ENSMUST00000044684_N3	ENSMUSG00000035266	Helq	0	A5
ENSMUST00000044790	ENSMUST00000044790_N1	ENSMUSG00000042002	Foxn4	2.021
ENSMUST00000044790	ENSMUST00000044790_N2	ENSMUSG00000042002	Foxn4	2.70809
ENSMUST00000045291	ENSMUST00000045291_N22	ENSMUSG00000038056	Kmt2c	2.8602	A3;SE
ENSMUST00000045301	ENSMUST00000045301_N1	ENSMUSG00000052565	Hist1h1d	65.8812
ENSMUST00000045469	ENSMUST00000045469_N10	ENSMUSG00000034902	Pip5k1c	0	A5;RI
ENSMUST00000045817	ENSMUST00000045817_N1	ENSMUSG00000036915	Kirrel2	2.28138	RI
ENSMUST00000046030	ENSMUST00000046030_N1	ENSMUSG00000045624	Esf1	1.74978
ENSMUST00000046073	ENSMUST00000046073_N3	ENSMUSG00000029475	Kdm2b	25.8938	RI
ENSMUST00000046093	ENSMUST00000046093_N1	ENSMUSG00000040148	Hmx3	15.6611
ENSMUST00000046144	ENSMUST00000046144_N5	ENSMUSG00000037003	Tns2	0	AF
ENSMUST00000046244	ENSMUST00000046244_N2	ENSMUSG00000040482	Dxo	4.10147
ENSMUST00000046260	ENSMUST00000046260_N3	ENSMUSG00000078584	AU022252	0	RI
ENSMUST00000046525	ENSMUST00000046525_N5	ENSMUSG00000040680	Kremen2	3.04234	RI
ENSMUST00000046558	ENSMUST00000046558_N1	ENSMUSG00000063172	Hspb11	9.62705	A5
ENSMUST00000046558	ENSMUST00000046558_N2	ENSMUSG00000063172	Hspb11	19.7983
ENSMUST00000046717	ENSMUST00000046717_N5	ENSMUSG00000033943	Mga	4.27797
ENSMUST00000046777	ENSMUST00000046777_N3	ENSMUSG00000032965	Ift57	18.3284
ENSMUST00000046875	ENSMUST00000046875_N3	ENSMUSG00000037470	Uggt1	0.970712
ENSMUST00000047025	ENSMUST00000047025_N1	ENSMUSG00000034990	Otoa	4.13061
ENSMUST00000047037	ENSMUST00000047037_N1	ENSMUSG00000037475	Thoc2	7.57689
ENSMUST00000047085	ENSMUST00000047085_N2	ENSMUSG00000038520	Tbc1d17	2.9464
ENSMUST00000047322	ENSMUST00000047322_N3	ENSMUSG00000041238	Rbbp8	3.27795	A5
ENSMUST00000047443	ENSMUST00000047443_N2	ENSMUSG00000032718	Mansc1	0.817979
ENSMUST00000047865	ENSMUST00000047865_N4	ENSMUSG00000041607	Mbp	6.51176	A5
ENSMUST00000048054	ENSMUST00000048054_N1	ENSMUSG00000019214	Chtf18	3.9813
ENSMUST00000048188	ENSMUST00000048188_N2	ENSMUSG00000072501	Phf20l1	0	A3;SE
ENSMUST00000048377	ENSMUST00000048377_N7	ENSMUSG00000040297	Suco	1.02945	A3;RI
ENSMUST00000048444	ENSMUST00000048444_N1	ENSMUSG00000074155	Klk5	4.49264	AF
ENSMUST00000048444	ENSMUST00000048444_N2	ENSMUSG00000074155	Klk5	23.5713
ENSMUST00000048568	ENSMUST00000048568_N1	ENSMUSG00000042106	Fam212a	7.1761
ENSMUST00000048613	ENSMUST00000048613_N2	ENSMUSG00000057715	A830018L16Rik	0
ENSMUST00000048630	ENSMUST00000048630_N7	ENSMUSG00000042401	Crtac1	1.40432	A5
ENSMUST00000048653	ENSMUST00000048653_N3	ENSMUSG00000034361	Cpne2	38.5599
ENSMUST00000048665	ENSMUST00000048665_N11	ENSMUSG00000056608	Chd9	2.8414
ENSMUST00000048691	ENSMUST00000048691_N5	ENSMUSG00000042256	Ptchd4	0.940903	A3
ENSMUST00000048691	ENSMUST00000048691_N4	ENSMUSG00000042256	Ptchd4	0.516477	SE
ENSMUST00000048935	ENSMUST00000048935_N1	ENSMUSG00000042372	Dmrt3	0.647875	A5
ENSMUST00000048945	ENSMUST00000048945_N1	ENSMUSG00000053719	Klk1b26	82.1883	AF
ENSMUST00000048945	ENSMUST00000048945_N2	ENSMUSG00000053719	Klk1b26	42.7106
ENSMUST00000048957	ENSMUST00000048957_N6	ENSMUSG00000034573	Ptpn13	5.9743	A5
ENSMUST00000048957	ENSMUST00000048957_N8	ENSMUSG00000034573	Ptpn13	23.2507	A5
ENSMUST00000048962	ENSMUST00000048962_N2	ENSMUSG00000034311	Kif4	3.67856	A3
ENSMUST00000048977	ENSMUST00000048977_N2	ENSMUSG00000042942	Greb1l	3.29811
ENSMUST00000049156	ENSMUST00000049156_N2	ENSMUSG00000034105	Tldc1	0.570082
ENSMUST00000049298	ENSMUST00000049298_N2	ENSMUSG00000040046	Tph1	0.988223	AF
ENSMUST00000049768	ENSMUST00000049768_N1	ENSMUSG00000052234	Epx	3.30687	A3
ENSMUST00000049787	ENSMUST00000049787_N2	ENSMUSG00000043110	Lrrn4	5.91053	AF
ENSMUST00000049994	ENSMUST00000049994_N1	ENSMUSG00000048899	Rimkla	5.46134
ENSMUST00000050029	ENSMUST00000050029_N1	ENSMUSG00000051367	Six1	16.6047	A5;AF
ENSMUST00000050047	ENSMUST00000050047_N1	ENSMUSG00000044816	D630023F18Rik	0	A5;AL
ENSMUST00000050309	ENSMUST00000050309_N1	ENSMUSG00000043727	F830045P16Rik	2.82503	AF
ENSMUST00000050309	ENSMUST00000050309_N2	ENSMUSG00000043727	F830045P16Rik	0.798173	AF
ENSMUST00000050556	ENSMUST00000050556_N3	ENSMUSG00000061755	Bod1l	2.3487	A3;RI;SE
ENSMUST00000050702	ENSMUST00000050702_N4	ENSMUSG00000035916	Ptprq	8.6622	A5;RI
ENSMUST00000050702	ENSMUST00000050702_N6	ENSMUSG00000035916	Ptprq	62.1848	SE
ENSMUST00000050702	ENSMUST00000050702_N3	ENSMUSG00000035916	Ptprq	4.90896
ENSMUST00000050732	ENSMUST00000050732_N1	ENSMUSG00000051727	Kctd14	1.1478	AF
ENSMUST00000050732	ENSMUST00000050732_N3	ENSMUSG00000051727	Kctd14	0.334941
ENSMUST00000050732	ENSMUST00000050732_N4	ENSMUSG00000051727	Kctd14	1.8007	A5
ENSMUST00000050732	ENSMUST00000050732_N2	ENSMUSG00000051727	Kctd14	3.49877	A5;SE
ENSMUST00000050756	ENSMUST00000050756_N2	ENSMUSG00000044071	Fam19a2	0.773759	AF
ENSMUST00000050756	ENSMUST00000050756_N3	ENSMUSG00000044071	Fam19a2	10.5821	SE
ENSMUST00000050859	ENSMUST00000050859_N5	ENSMUSG00000016756	Cmah	0	A5;RI
ENSMUST00000050958	ENSMUST00000050958_N4	ENSMUSG00000049555	Tmie	9.29595	A3
ENSMUST00000050963	ENSMUST00000050963_N1	ENSMUSG00000046108	Il17c	11.3995
ENSMUST00000051005	ENSMUST00000051005_N1	ENSMUSG00000049511	Htr1b	3.97088
ENSMUST00000051118	ENSMUST00000051118_N6	ENSMUSG00000050908	Tvp23a	0	SE
ENSMUST00000051118	ENSMUST00000051118_N3	ENSMUSG00000050908	Tvp23a	33.4451	AL
ENSMUST00000051226	ENSMUST00000051226_N1	ENSMUSG00000033065	Pfkm	1.12945
ENSMUST00000051226	ENSMUST00000051226_N2	ENSMUSG00000033065	Pfkm	0	AF
ENSMUST00000051416	ENSMUST00000051416_N2	ENSMUSG00000026986	Hnmt	4.01068
ENSMUST00000051552	ENSMUST00000051552_N1	ENSMUSG00000042371	Slc5a10	7.89988	AF
ENSMUST00000051552	ENSMUST00000051552_N4	ENSMUSG00000042371	Slc5a10	5.99624
ENSMUST00000051765	ENSMUST00000051765_N1	ENSMUSG00000049928	Glp2r	2.02341
ENSMUST00000051810	ENSMUST00000051810_N3	ENSMUSG00000040428	Plekha4	5.72178	RI
ENSMUST00000051934	ENSMUST00000051934_N3	ENSMUSG00000044715	Gskip	1.04007
ENSMUST00000052368	ENSMUST00000052368_N5	ENSMUSG00000037369	Kdm6a	8.22798	A5
ENSMUST00000052901	ENSMUST00000052901_N1	ENSMUSG00000094810	Olfr907	0
ENSMUST00000052937	ENSMUST00000052937_N1	ENSMUSG00000046378	Asphd1	0	A5;RI
ENSMUST00000053013	ENSMUST00000053013_N1	ENSMUSG00000027788	Otol1	0.963546	AF
ENSMUST00000053445	ENSMUST00000053445_N4	ENSMUSG00000066129	Kndc1	0.863722	A3;RI
ENSMUST00000053464	ENSMUST00000053464_N1	ENSMUSG00000043073	Usp17le	2.19864	AF;SE
ENSMUST00000053577	ENSMUST00000053577_N4	ENSMUSG00000045394	Epcam	21.5554	A5;RI
ENSMUST00000053768	ENSMUST00000053768_N2	ENSMUSG00000046314	Stxbp6	8.20325
ENSMUST00000053768	ENSMUST00000053768_N3	ENSMUSG00000046314	Stxbp6	3.6463	SE
ENSMUST00000054107	ENSMUST00000054107_N1	ENSMUSG00000044952	Kctd21	5.20393
ENSMUST00000054462	ENSMUST00000054462_N7	ENSMUSG00000003134	Tbc1d8	0	A5;RI
ENSMUST00000054825	ENSMUST00000054825_N1	ENSMUSG00000049404	Rarres1	7.71092	AF
ENSMUST00000054836	ENSMUST00000054836_N3	ENSMUSG00000046607	Hrk	2.9305	AF
ENSMUST00000055052	ENSMUST00000055052_N3	ENSMUSG00000061825	Ces2c	0.929915
ENSMUST00000055257	ENSMUST00000055257_N1	ENSMUSG00000043068	Fam89a	0	AF
ENSMUST00000055257	ENSMUST00000055257_N3	ENSMUSG00000043068	Fam89a	16.8499	AF
ENSMUST00000055257	ENSMUST00000055257_N4	ENSMUSG00000043068	Fam89a	5.59963
ENSMUST00000055324	ENSMUST00000055324_N3	ENSMUSG00000043827	Olfr94	18.9613
ENSMUST00000055324	ENSMUST00000055324_N2	ENSMUSG00000043827	Olfr94	0.658172	MX
ENSMUST00000055406	ENSMUST00000055406_N1	ENSMUSG00000049897	Stkld1	12.1049
ENSMUST00000055406	ENSMUST00000055406_N3	ENSMUSG00000049897	Stkld1	71.4698
ENSMUST00000055490	ENSMUST00000055490_N2	ENSMUSG00000050201	Otop2	0.39374
ENSMUST00000055993	ENSMUST00000055993_N4	ENSMUSG00000048330	Ric3	0
ENSMUST00000056130	ENSMUST00000056130_N1	ENSMUSG00000045509	Gpr150	0.873635
ENSMUST00000056130	ENSMUST00000056130_N2	ENSMUSG00000045509	Gpr150	1.87571	A5
ENSMUST00000056416	ENSMUST00000056416_N7	ENSMUSG00000008658	Rbfox1	1.92384
ENSMUST00000056416	ENSMUST00000056416_N9	ENSMUSG00000008658	Rbfox1	5.0552	SE
ENSMUST00000056416	ENSMUST00000056416_N18	ENSMUSG00000008658	Rbfox1	1.27593	AF
ENSMUST00000056660	ENSMUST00000056660_N10	ENSMUSG00000046157	Tmem229b	3.09293
ENSMUST00000057067	ENSMUST00000057067_N1	ENSMUSG00000043289	Mei4	0	AF
ENSMUST00000057067	ENSMUST00000057067_N2	ENSMUSG00000043289	Mei4	9.02514
ENSMUST00000057272	ENSMUST00000057272_N11	ENSMUSG00000037270	4932438A13Rik	6.24485
ENSMUST00000057272	ENSMUST00000057272_N4	ENSMUSG00000037270	4932438A13Rik	9.51e-06
ENSMUST00000057742	ENSMUST00000057742_N3	ENSMUSG00000032564	Cpne4	4.41985
ENSMUST00000057927	ENSMUST00000057927_N2	ENSMUSG00000044562	Rasip1	0.879662	RI
ENSMUST00000058056	ENSMUST00000058056_N1	ENSMUSG00000046845	Il1f10	3.24066	SE
ENSMUST00000058056	ENSMUST00000058056_N2	ENSMUSG00000046845	Il1f10	0	AF
ENSMUST00000058056	ENSMUST00000058056_N3	ENSMUSG00000046845	Il1f10	5.93143	SE
ENSMUST00000058098	ENSMUST00000058098_N2	ENSMUSG00000046873	Mbtps2	0
ENSMUST00000058104	ENSMUST00000058104_N1	ENSMUSG00000030469	Zfp719	1.82548	A5
ENSMUST00000058159	ENSMUST00000058159_N1	ENSMUSG00000044629	Cnrip1	3.35098
ENSMUST00000058429	ENSMUST00000058429_N1	ENSMUSG00000044701	Il27	11.2093
ENSMUST00000058464	ENSMUST00000058464_N5	ENSMUSG00000058260	Serpina9	0.475136	A5
ENSMUST00000058605	ENSMUST00000058605_N1	ENSMUSG00000049972	Skint9	13.7947
ENSMUST00000058790	ENSMUST00000058790_N1	ENSMUSG00000048058	Ldlrad3	4.14292
ENSMUST00000059438	ENSMUST00000059438_N1	ENSMUSG00000040177	2310057M21Rik	0.381385
ENSMUST00000059650	ENSMUST00000059650_N1	ENSMUSG00000043659	Npsr1	1.0817	RI
ENSMUST00000059650	ENSMUST00000059650_N10	ENSMUSG00000043659	Npsr1	0.453755	A3
ENSMUST00000059650	ENSMUST00000059650_N12	ENSMUSG00000043659	Npsr1	3.76639	A3
ENSMUST00000059650	ENSMUST00000059650_N13	ENSMUSG00000043659	Npsr1	3.01233	AF
ENSMUST00000059650	ENSMUST00000059650_N15	ENSMUSG00000043659	Npsr1	1.38813	A3
ENSMUST00000059650	ENSMUST00000059650_N11	ENSMUSG00000043659	Npsr1	6.28612	AF
ENSMUST00000059650	ENSMUST00000059650_N3	ENSMUSG00000043659	Npsr1	1.9071
ENSMUST00000059650	ENSMUST00000059650_N4	ENSMUSG00000043659	Npsr1	0
ENSMUST00000059650	ENSMUST00000059650_N5	ENSMUSG00000043659	Npsr1	5.08849
ENSMUST00000059650	ENSMUST00000059650_N6	ENSMUSG00000043659	Npsr1	3.15498
ENSMUST00000059650	ENSMUST00000059650_N9	ENSMUSG00000043659	Npsr1	2.78265
ENSMUST00000059650	ENSMUST00000059650_N2	ENSMUSG00000043659	Npsr1	1.6232	SE
ENSMUST00000059662	ENSMUST00000059662_N14	ENSMUSG00000046034	Otulin	11.101	A5;SE
ENSMUST00000059662	ENSMUST00000059662_N2	ENSMUSG00000046034	Otulin	3.92538	A3;RI;SE
ENSMUST00000059662	ENSMUST00000059662_N4	ENSMUSG00000046034	Otulin	8.7938	A3;SE
ENSMUST00000059707	ENSMUST00000059707_N3	ENSMUSG00000051617	Krt9	15.3422
ENSMUST00000059707	ENSMUST00000059707_N1	ENSMUSG00000051617	Krt9	11.5959
ENSMUST00000059983	ENSMUST00000059983_N3	ENSMUSG00000050732	Vamp8	4.94015	AF
ENSMUST00000060057	ENSMUST00000060057_N1	ENSMUSG00000044400	Sowahd	4.0541
ENSMUST00000060208	ENSMUST00000060208_N7	ENSMUSG00000042064	Myo3b	9.15739	A3;A5
ENSMUST00000060208	ENSMUST00000060208_N8	ENSMUSG00000042064	Myo3b	22.9016
ENSMUST00000060208	ENSMUST00000060208_N10	ENSMUSG00000042064	Myo3b	28.4493
ENSMUST00000060327	ENSMUST00000060327_N1	ENSMUSG00000048766	Skint10	94.2084	SE
ENSMUST00000060650	ENSMUST00000060650_N4	ENSMUSG00000036131	Frmd7	1.56992
ENSMUST00000060824	ENSMUST00000060824_N2	ENSMUSG00000031271	Serpina7	0	A3
ENSMUST00000060824	ENSMUST00000060824_N1	ENSMUSG00000031271	Serpina7	13.9752	A3;SE
ENSMUST00000060835	ENSMUST00000060835_N1	ENSMUSG00000010342	Tex14	6.82834
ENSMUST00000060864	ENSMUST00000060864_N1	ENSMUSG00000028458	Tesk1	1.91726
ENSMUST00000061052	ENSMUST00000061052_N7	ENSMUSG00000024426	Atat1	0
ENSMUST00000061185	ENSMUST00000061185_N1	ENSMUSG00000067615	Krt81	14.3657
ENSMUST00000061185	ENSMUST00000061185_N2	ENSMUSG00000067615	Krt81	6.87699	RI
ENSMUST00000061552	ENSMUST00000061552_N4	ENSMUSG00000074305	Peak1	5.49908	A5
ENSMUST00000061552	ENSMUST00000061552_N5	ENSMUSG00000074305	Peak1	1.36e-06
ENSMUST00000061699	ENSMUST00000061699_N1	ENSMUSG00000050108	Bpifc	3.07096
ENSMUST00000061831	ENSMUST00000061831_N1	ENSMUSG00000044313	Mab21l3	0	A5;AF
ENSMUST00000061859	ENSMUST00000061859_N1	ENSMUSG00000043311	D17H6S53E	2.34603	AF
ENSMUST00000062108	ENSMUST00000062108_N10	ENSMUSG00000042349	Ikbke	1.50842	A5;RI
ENSMUST00000062118	ENSMUST00000062118_N6	ENSMUSG00000043257	Pigv	0.834429	RI
ENSMUST00000063191	ENSMUST00000063191_N1	ENSMUSG00000045827	Serpinb9	0.966147	RI
ENSMUST00000063191	ENSMUST00000063191_N5	ENSMUSG00000045827	Serpinb9	2.55404	A5;RI
ENSMUST00000063191	ENSMUST00000063191_N9	ENSMUSG00000045827	Serpinb9	0	A5
ENSMUST00000063191	ENSMUST00000063191_N10	ENSMUSG00000045827	Serpinb9	3.2846	A3
ENSMUST00000063417	ENSMUST00000063417_N12	ENSMUSG00000024097	Srsf7	0	A5;RI
ENSMUST00000064110	ENSMUST00000064110_N1	ENSMUSG00000052301	Doc2a	1.06608
ENSMUST00000064139	ENSMUST00000064139_N2	ENSMUSG00000028517	Plpp3	32.1551
ENSMUST00000064257	ENSMUST00000064257_N2	ENSMUSG00000052415	Tchh	4.35341	A3
ENSMUST00000064476	ENSMUST00000064476_N1	ENSMUSG00000052549	Arl13a	3.07273	AF
ENSMUST00000064916	ENSMUST00000064916_N2	ENSMUSG00000062345	Serpinb2	2.94125	SE
ENSMUST00000064916	ENSMUST00000064916_N1	ENSMUSG00000062345	Serpinb2	1.22616	RI
ENSMUST00000065169	ENSMUST00000065169_N19	ENSMUSG00000036180	Gatad2a	1.62504
ENSMUST00000065286	ENSMUST00000065286_N8	ENSMUSG00000057858	Fam204a	8.60406	A5
ENSMUST00000065291	ENSMUST00000065291_N3	ENSMUSG00000053070	9230110C19Rik	2.35126
ENSMUST00000065601	ENSMUST00000065601_N1	ENSMUSG00000025217	Btrc	0	AF
ENSMUST00000065767	ENSMUST00000065767_N1	ENSMUSG00000026047	Kdelc1	0.630671	A3;RI;SE
ENSMUST00000066308	ENSMUST00000066308_N1	ENSMUSG00000046585	Cfap58	16.8831	A5
ENSMUST00000066432	ENSMUST00000066432_N2	ENSMUSG00000057182	Scn3a	0.302103	A3;A5;SE
ENSMUST00000066432	ENSMUST00000066432_N3	ENSMUSG00000057182	Scn3a	0.429633
ENSMUST00000066554	ENSMUST00000066554_N1	ENSMUSG00000054134	Umodl1	0.166445	AF
ENSMUST00000066652	ENSMUST00000066652_N4	ENSMUSG00000036333	Kidins220	19.3032	A3
ENSMUST00000066717	ENSMUST00000066717_N3	ENSMUSG00000053477	Tcf4	1.50486
ENSMUST00000066780	ENSMUST00000066780_N5	ENSMUSG00000054005	Mill1	2.48461	SE
ENSMUST00000066780	ENSMUST00000066780_N4	ENSMUSG00000054005	Mill1	15.7663	SE
ENSMUST00000066905	ENSMUST00000066905_N2	ENSMUSG00000030077	Chl1	0
ENSMUST00000067060	ENSMUST00000067060_N3	ENSMUSG00000054191	Klf1	3.95178
ENSMUST00000067543	ENSMUST00000067543_N2	ENSMUSG00000032501	Trib1	1.11053	A5
ENSMUST00000067543	ENSMUST00000067543_N3	ENSMUSG00000032501	Trib1	2.63444
ENSMUST00000067680	ENSMUST00000067680_N3	ENSMUSG00000054555	Adam12	2.09144	RI
ENSMUST00000067689	ENSMUST00000067689_N1	ENSMUSG00000047888	Tnrc6b	4.34993
ENSMUST00000067836	ENSMUST00000067836_N5	ENSMUSG00000054662	Ano9	4.02981	RI
ENSMUST00000067924	ENSMUST00000067924_N3	ENSMUSG00000054720	Lrrc8c	4.91904	A5
ENSMUST00000067924	ENSMUST00000067924_N1	ENSMUSG00000054720	Lrrc8c	0.82033	A5
ENSMUST00000068302	ENSMUST00000068302_N1	ENSMUSG00000058349	Tas2r117	0.579365
ENSMUST00000068355	ENSMUST00000068355_N1	ENSMUSG00000043972	Opn5	0.828921
ENSMUST00000068625	ENSMUST00000068625_N1	ENSMUSG00000055193	Klk15	6.54941
ENSMUST00000068878	ENSMUST00000068878_N3	ENSMUSG00000004707	Ly9	0.799653
ENSMUST00000068947	ENSMUST00000068947_N3	ENSMUSG00000029098	Acox3	0	A3;AL
ENSMUST00000069097	ENSMUST00000069097_N4	ENSMUSG00000028842	Ago3	6.79e-06	SE
ENSMUST00000069106	ENSMUST00000069106_N1	ENSMUSG00000055493	Epm2a	7.53222	AF
ENSMUST00000069268	ENSMUST00000069268_N1	ENSMUSG00000056901	Tas2r102	0.613288
ENSMUST00000069695	ENSMUST00000069695_N8	ENSMUSG00000055912	Tmem150a	0	A3;RI
ENSMUST00000069927	ENSMUST00000069927_N1	ENSMUSG00000056054	S100a8	1.0227
ENSMUST00000070059	ENSMUST00000070059_N7	ENSMUSG00000056133	Gm9992	5.90829
ENSMUST00000070200	ENSMUST00000070200_N2	ENSMUSG00000056220	Pla2g4a	26.804	RI
ENSMUST00000070246	ENSMUST00000070246_N1	ENSMUSG00000012126	Ubxn11	22.4431
ENSMUST00000070258	ENSMUST00000070258_N1	ENSMUSG00000056257	Gm5447	3.87882
ENSMUST00000071076	ENSMUST00000071076_N4	ENSMUSG00000056755	Grm7	5.30896	A3;A5;SE
ENSMUST00000071076	ENSMUST00000071076_N5	ENSMUSG00000056755	Grm7	10.3629	A5
ENSMUST00000071104	ENSMUST00000071104_N1	ENSMUSG00000056605	Krt72	4.9798
ENSMUST00000071152	ENSMUST00000071152_N8	ENSMUSG00000020696	Rffl	0
ENSMUST00000071325	ENSMUST00000071325_N5	ENSMUSG00000020716	Nf1	0
ENSMUST00000071535	ENSMUST00000071535_N12	ENSMUSG00000068587	Mgam	2.36984	A5;AF
ENSMUST00000072156	ENSMUST00000072156_N9	ENSMUSG00000023800	Tiam2	0	A5;AF
ENSMUST00000072451	ENSMUST00000072451_N4	ENSMUSG00000037341	Slc9a7	28.6134
ENSMUST00000072476	ENSMUST00000072476_N1	ENSMUSG00000001168	Oas1h	4.08806
ENSMUST00000072476	ENSMUST00000072476_N2	ENSMUSG00000001168	Oas1h	9.14441	A5
ENSMUST00000072646	ENSMUST00000072646_N1	ENSMUSG00000021280	Exoc3l4	3.7281	AF
ENSMUST00000072767	ENSMUST00000072767_N10	ENSMUSG00000059495	Arhgef12	4.78212
ENSMUST00000072965	ENSMUST00000072965_N3	ENSMUSG00000015149	Sirt2	0
ENSMUST00000073151	ENSMUST00000073151_N2	ENSMUSG00000060508	Nlrp9b	1.22995	AL
ENSMUST00000073295	ENSMUST00000073295_N1	ENSMUSG00000064224	Gsdma3	24.4405	AF
ENSMUST00000073295	ENSMUST00000073295_N2	ENSMUSG00000064224	Gsdma3	21.8582
ENSMUST00000073391	ENSMUST00000073391_N1	ENSMUSG00000062432	Cyp26c1	3.77066
ENSMUST00000073575	ENSMUST00000073575_N1	ENSMUSG00000002105	Slc39a13	3.48107	A3;RI;SE
ENSMUST00000074156	ENSMUST00000074156_N6	ENSMUSG00000026807	Ak8	6.52695
ENSMUST00000074171	ENSMUST00000074171_N7	ENSMUSG00000062372	Otof	2.54248
ENSMUST00000074449	ENSMUST00000074449_N2	ENSMUSG00000078664	Sprr2a1	0.847388	RI
ENSMUST00000074557	ENSMUST00000074557_N1	ENSMUSG00000060586	H2-Eb1	105.416
ENSMUST00000075175	ENSMUST00000075175_N3	ENSMUSG00000058833	Rex1bd	1.10888	A3;RI
ENSMUST00000075371	ENSMUST00000075371_N1	ENSMUSG00000059280	Vpreb2	1.89926
ENSMUST00000075448	ENSMUST00000075448_N1	ENSMUSG00000028565	Nfia	5.06302	AF
ENSMUST00000075639	ENSMUST00000075639_N5	ENSMUSG00000063458	Lrmda	24.2565
ENSMUST00000075693	ENSMUST00000075693_N6	ENSMUSG00000057375	Yipf1	7.85302
ENSMUST00000075843	ENSMUST00000075843_N1	ENSMUSG00000002885	Adgre5	3.07545
ENSMUST00000075953	ENSMUST00000075953_N1	ENSMUSG00000060256	Tdpoz4	5.66898
ENSMUST00000076256	ENSMUST00000076256_N9	ENSMUSG00000060550	H2-Q7	11.0969	RI
ENSMUST00000076521	ENSMUST00000076521_N2	ENSMUSG00000026638	Irf6	1.04924
ENSMUST00000076648	ENSMUST00000076648_N1	ENSMUSG00000047730	Fcgbp	13.1795	A5
ENSMUST00000076648	ENSMUST00000076648_N10	ENSMUSG00000047730	Fcgbp	21.6672	AF
ENSMUST00000076648	ENSMUST00000076648_N14	ENSMUSG00000047730	Fcgbp	4.23159
ENSMUST00000076648	ENSMUST00000076648_N6	ENSMUSG00000047730	Fcgbp	0.167316	A5
ENSMUST00000076648	ENSMUST00000076648_N8	ENSMUSG00000047730	Fcgbp	6.42385	A5
ENSMUST00000076648	ENSMUST00000076648_N3	ENSMUSG00000047730	Fcgbp	6.6129	A5;SE
ENSMUST00000076737	ENSMUST00000076737_N1	ENSMUSG00000061928	Dsg1b	45.2839	RI
ENSMUST00000076810	ENSMUST00000076810_N19	ENSMUSG00000061751	Kalrn	0
ENSMUST00000076894	ENSMUST00000076894_N4	ENSMUSG00000040782	Rfwd2	20.2583	A3;SE
ENSMUST00000077146	ENSMUST00000077146_N2	ENSMUSG00000069441	Dsg1a	55.2246
ENSMUST00000077173	ENSMUST00000077173_N1	ENSMUSG00000064010	Dppa1	1.84869
ENSMUST00000077471	ENSMUST00000077471_N2	ENSMUSG00000075151	Olfr1136	3.15543
ENSMUST00000077706	ENSMUST00000077706_N5	ENSMUSG00000032530	Lyzl4	1.96762	AF;SE
ENSMUST00000077706	ENSMUST00000077706_N1	ENSMUSG00000032530	Lyzl4	0.877326	AF
ENSMUST00000077855	ENSMUST00000077855_N2	ENSMUSG00000066704	Cyp2b19	1.70307
ENSMUST00000077909	ENSMUST00000077909_N17	ENSMUSG00000031024	St5	2.90033	A5;AF
ENSMUST00000077909	ENSMUST00000077909_N9	ENSMUSG00000031024	St5	0.680679
ENSMUST00000078307	ENSMUST00000078307_N1	ENSMUSG00000061584	Lyg2	9.77849
ENSMUST00000078364	ENSMUST00000078364_N1	ENSMUSG00000060747	Ifnl3	12.816
ENSMUST00000078605	ENSMUST00000078605_N1	ENSMUSG00000058252	Tcp11x2	2.03376
ENSMUST00000078880	ENSMUST00000078880_N3	ENSMUSG00000063434	Sorcs3	7.78163	A5
ENSMUST00000078880	ENSMUST00000078880_N2	ENSMUSG00000063434	Sorcs3	3.2889
ENSMUST00000079461	ENSMUST00000079461_N2	ENSMUSG00000073434	Wdr90	0	A5
ENSMUST00000080210	ENSMUST00000080210_N2	ENSMUSG00000005089	Slc1a2	2.04846
ENSMUST00000080322	ENSMUST00000080322_N2	ENSMUSG00000052776	Oas1a	1.87365
ENSMUST00000080359	ENSMUST00000080359_N1	ENSMUSG00000029249	Rest	1.27751
ENSMUST00000080533	ENSMUST00000080533_N1	ENSMUSG00000064213	Defa24	0
ENSMUST00000080665	ENSMUST00000080665_N3	ENSMUSG00000056752	Dnah9	17.2006	SE
ENSMUST00000081202	ENSMUST00000081202_N5	ENSMUSG00000063019	Manbal	7.55344	A5
ENSMUST00000081265	ENSMUST00000081265_N1	ENSMUSG00000057098	Ebf1	2.65248
ENSMUST00000081277	ENSMUST00000081277_N1	ENSMUSG00000059956	Serpinb12	0	AF
ENSMUST00000081277	ENSMUST00000081277_N2	ENSMUSG00000059956	Serpinb12	0.985279	A5
ENSMUST00000081277	ENSMUST00000081277_N3	ENSMUSG00000059956	Serpinb12	3.17634
ENSMUST00000081277	ENSMUST00000081277_N4	ENSMUSG00000059956	Serpinb12	7.18318
ENSMUST00000081496	ENSMUST00000081496_N11	ENSMUSG00000024940	Ltbp3	0	RI;SE
ENSMUST00000081496	ENSMUST00000081496_N16	ENSMUSG00000024940	Ltbp3	1.22168
ENSMUST00000081510	ENSMUST00000081510_N7	ENSMUSG00000054612	Mgmt	0.915706
ENSMUST00000081684	ENSMUST00000081684_N1	ENSMUSG00000059128	Ifnl2	15.9972
ENSMUST00000081780	ENSMUST00000081780_N1	ENSMUSG00000058005	Tdpoz3	2.3002
ENSMUST00000081819	ENSMUST00000081819_N4	ENSMUSG00000040405	Havcr1	2.08311	SE
ENSMUST00000081819	ENSMUST00000081819_N2	ENSMUSG00000040405	Havcr1	5.55819
ENSMUST00000082104	ENSMUST00000082104_N6	ENSMUSG00000060924	Csmd1	0.800357	A5;AF
ENSMUST00000082134	ENSMUST00000082134_N2	ENSMUSG00000037563	Rps16	5.56011
ENSMUST00000082197	ENSMUST00000082197_N13	ENSMUSG00000062906	Hdac10	2.60649	A5;RI
ENSMUST00000082235	ENSMUST00000082235_N2	ENSMUSG00000024313	Mep1b	7.22036
ENSMUST00000084032	ENSMUST00000084032_N6	ENSMUSG00000031555	Adam9	15.2892	AF;RI
ENSMUST00000084513	ENSMUST00000084513_N10	ENSMUSG00000030852	Tacc2	4.08183	A5
ENSMUST00000084527	ENSMUST00000084527_N4	ENSMUSG00000066151	Fkbp15	23.4632
ENSMUST00000084527	ENSMUST00000084527_N5	ENSMUSG00000066151	Fkbp15	20.9776	A5
ENSMUST00000084763	ENSMUST00000084763_N1	ENSMUSG00000016626	Nlrp14	0	AF
ENSMUST00000084830	ENSMUST00000084830_N1	ENSMUSG00000066279	Chrna10	8.26787	RI
ENSMUST00000084830	ENSMUST00000084830_N2	ENSMUSG00000066279	Chrna10	2.66978	A5;RI
ENSMUST00000084941	ENSMUST00000084941_N37	ENSMUSG00000021288	Klc1	1.24036	SE
ENSMUST00000084966	ENSMUST00000084966_N2	ENSMUSG00000067049	Unc93a	7.3171	AF
ENSMUST00000084966	ENSMUST00000084966_N3	ENSMUSG00000067049	Unc93a	0.96025	SE
ENSMUST00000084966	ENSMUST00000084966_N5	ENSMUSG00000067049	Unc93a	73.8449
ENSMUST00000084966	ENSMUST00000084966_N1	ENSMUSG00000067049	Unc93a	13.1816
ENSMUST00000085144	ENSMUST00000085144_N1	ENSMUSG00000066031	Gm13023	3.16355
ENSMUST00000085299	ENSMUST00000085299_N4	ENSMUSG00000034574	Daam1	11.0834	A5;AF
ENSMUST00000085308	ENSMUST00000085308_N1	ENSMUSG00000066463	Omt2a	11.5458	A5
ENSMUST00000085553	ENSMUST00000085553_N3	ENSMUSG00000020656	Grhl1	5.31193
ENSMUST00000085555	ENSMUST00000085555_N7	ENSMUSG00000016181	Diexf	0.728352	RI
ENSMUST00000086538	ENSMUST00000086538_N2	ENSMUSG00000054640	Slc8a1	0	AF;MX
ENSMUST00000086564	ENSMUST00000086564_N5	ENSMUSG00000041890	Git2	0
ENSMUST00000086687	ENSMUST00000086687_N4	ENSMUSG00000064247	Plcxd1	1.21143	A5
ENSMUST00000087012	ENSMUST00000087012_N6	ENSMUSG00000067144	Slc22a7	4.36534	A3;RI
ENSMUST00000087012	ENSMUST00000087012_N7	ENSMUSG00000067144	Slc22a7	1.27447	RI
ENSMUST00000087012	ENSMUST00000087012_N1	ENSMUSG00000067144	Slc22a7	1.25373	A3;AF;RI
ENSMUST00000087315	ENSMUST00000087315_N1	ENSMUSG00000007029	Vars	71.9436
ENSMUST00000087556	ENSMUST00000087556_N3	ENSMUSG00000024943	Smc5	0
ENSMUST00000087622	ENSMUST00000087622_N14	ENSMUSG00000030231	Plekha5	0
ENSMUST00000088029	ENSMUST00000088029_N1	ENSMUSG00000067604	Nms	8.8209
ENSMUST00000088555	ENSMUST00000088555_N1	ENSMUSG00000047295	Smgc	0.807557	SE
ENSMUST00000088644	ENSMUST00000088644_N10	ENSMUSG00000045962	Wnk1	4.7521
ENSMUST00000088653	ENSMUST00000088653_N1	ENSMUSG00000067872	Ccdc87	4.82995
ENSMUST00000088735	ENSMUST00000088735_N1	ENSMUSG00000022026	Olfm4	31.2685	SE
ENSMUST00000088735	ENSMUST00000088735_N2	ENSMUSG00000022026	Olfm4	16.5934
ENSMUST00000088778	ENSMUST00000088778_N7	ENSMUSG00000067924	Rtl8b	15.1573
ENSMUST00000088786	ENSMUST00000088786_N5	ENSMUSG00000003161	Sri	25.6015	SE
ENSMUST00000088904	ENSMUST00000088904_N6	ENSMUSG00000049515	Espnl	7.96238	A3
ENSMUST00000088904	ENSMUST00000088904_N5	ENSMUSG00000049515	Espnl	2.23103	A3;A5
ENSMUST00000088924	ENSMUST00000088924_N1	ENSMUSG00000067998	Bpifb9a	1.37803
ENSMUST00000089295	ENSMUST00000089295_N1	ENSMUSG00000046500	Fam19a4	4.66476	SE
ENSMUST00000089295	ENSMUST00000089295_N2	ENSMUSG00000046500	Fam19a4	8.79745
ENSMUST00000089519	ENSMUST00000089519_N2	ENSMUSG00000057230	Aak1	1.36e-06	AF;RI;SE
ENSMUST00000090260	ENSMUST00000090260_N1	ENSMUSG00000068606	Gm4841	5.64349
ENSMUST00000090398	ENSMUST00000090398_N5	ENSMUSG00000021782	Dlg5	1.97909
ENSMUST00000090558	ENSMUST00000090558_N2	ENSMUSG00000068740	Celsr2	3.26163
ENSMUST00000091278	ENSMUST00000091278_N1	ENSMUSG00000069080	Lcn11	3.25858	AF
ENSMUST00000091377	ENSMUST00000091377_N2	ENSMUSG00000052075	1700029F12Rik	8.22972
ENSMUST00000091641	ENSMUST00000091641_N4	ENSMUSG00000021431	Snrnp48	0
ENSMUST00000091672	ENSMUST00000091672_N1	ENSMUSG00000069255	Dusp22	17.2343	AF
ENSMUST00000091742	ENSMUST00000091742_N1	ENSMUSG00000069302	Hist1h2ah	48.1733
ENSMUST00000092089	ENSMUST00000092089_N2	ENSMUSG00000074651	Mcidas	2.98345	A3;RI
ENSMUST00000092366	ENSMUST00000092366_N1	ENSMUSG00000069581	Tspear	6.51843	A3
ENSMUST00000092735	ENSMUST00000092735_N1	ENSMUSG00000018160	Med1	0.616625	A5
ENSMUST00000092955	ENSMUST00000092955_N19	ENSMUSG00000069833	Ahnak	1.36e-06	A5;RI
ENSMUST00000092955	ENSMUST00000092955_N24	ENSMUSG00000069833	Ahnak	0.318414	A3;RI
ENSMUST00000092955	ENSMUST00000092955_N25	ENSMUSG00000069833	Ahnak	5.66688
ENSMUST00000092955	ENSMUST00000092955_N29	ENSMUSG00000069833	Ahnak	3.02146	A3;A5;RI
ENSMUST00000092955	ENSMUST00000092955_N2	ENSMUSG00000069833	Ahnak	3.77423	A3
ENSMUST00000092955	ENSMUST00000092955_N4	ENSMUSG00000069833	Ahnak	9.51e-06	A5;RI
ENSMUST00000092955	ENSMUST00000092955_N8	ENSMUSG00000069833	Ahnak	0.154375	RI
ENSMUST00000092955	ENSMUST00000092955_N9	ENSMUSG00000069833	Ahnak	4.38188
ENSMUST00000092955	ENSMUST00000092955_N32	ENSMUSG00000069833	Ahnak	4.08e-06	A5;RI;SE
ENSMUST00000093132	ENSMUST00000093132_N6	ENSMUSG00000020385	Clk4	0	A5;RI;SE
ENSMUST00000093249	ENSMUST00000093249_N1	ENSMUSG00000036510	Cdh8	0.559829
ENSMUST00000093357	ENSMUST00000093357_N1	ENSMUSG00000005150	Wdr83	3.88967
ENSMUST00000093775	ENSMUST00000093775_N1	ENSMUSG00000070280	Slc22a14	0	AF
ENSMUST00000093791	ENSMUST00000093791_N14	ENSMUSG00000032534	Cep63	11.8317
ENSMUST00000093844	ENSMUST00000093844_N3	ENSMUSG00000035594	Chrna5	4.16565	RI
ENSMUST00000093844	ENSMUST00000093844_N5	ENSMUSG00000035594	Chrna5	1.36e-06	A5
ENSMUST00000093844	ENSMUST00000093844_N6	ENSMUSG00000035594	Chrna5	2.00746	A5;RI
ENSMUST00000093844	ENSMUST00000093844_N1	ENSMUSG00000035594	Chrna5	1.15205	AF
ENSMUST00000094018	ENSMUST00000094018_N1	ENSMUSG00000070366	Plpp4	0.595141
ENSMUST00000094715	ENSMUST00000094715_N1	ENSMUSG00000068082	Grxcr1	2.53264
ENSMUST00000094844	ENSMUST00000094844_N7	ENSMUSG00000047021	Cfap65	0.985237	A5
ENSMUST00000094870	ENSMUST00000094870_N5	ENSMUSG00000046792	Zfp787	40.4937
ENSMUST00000095350	ENSMUST00000095350_N7	ENSMUSG00000030232	Aebp2	14.7234	A5;AF
ENSMUST00000095350	ENSMUST00000095350_N8	ENSMUSG00000030232	Aebp2	12.9445	A5;AF
ENSMUST00000095350	ENSMUST00000095350_N1	ENSMUSG00000030232	Aebp2	30.4247	AF
ENSMUST00000095464	ENSMUST00000095464_N1	ENSMUSG00000035963	Odf3l2	0.786748
ENSMUST00000095529	ENSMUST00000095529_N6	ENSMUSG00000025551	Fgf14	8.54798	SE
ENSMUST00000095664	ENSMUST00000095664_N3	ENSMUSG00000030059	Tmf1	4.42277	A5
ENSMUST00000095798	ENSMUST00000095798_N1	ENSMUSG00000071361	Mcpt9	5.11322
ENSMUST00000096000	ENSMUST00000096000_N1	ENSMUSG00000037833	Sh2d4b	3.5493	A5;RI;SE
ENSMUST00000096000	ENSMUST00000096000_N3	ENSMUSG00000037833	Sh2d4b	21.0508	SE
ENSMUST00000096000	ENSMUST00000096000_N4	ENSMUSG00000037833	Sh2d4b	19.4118
ENSMUST00000096000	ENSMUST00000096000_N5	ENSMUSG00000037833	Sh2d4b	4.10198	SE
ENSMUST00000096691	ENSMUST00000096691_N1	ENSMUSG00000074695	Il22	41.2373
ENSMUST00000097227	ENSMUST00000097227_N3	ENSMUSG00000075706	Gpx4	0.667056	A3;AF
ENSMUST00000097418	ENSMUST00000097418_N10	ENSMUSG00000040899	Ccr6	1.02479	AF
ENSMUST00000097418	ENSMUST00000097418_N7	ENSMUSG00000040899	Ccr6	6.62788	MX;SE
ENSMUST00000097418	ENSMUST00000097418_N6	ENSMUSG00000040899	Ccr6	0.992365	A5;RI
ENSMUST00000097442	ENSMUST00000097442_N3	ENSMUSG00000026604	Ptpn14	4.33659	RI
ENSMUST00000097591	ENSMUST00000097591_N1	ENSMUSG00000073574	Grxcr2	2.57924
ENSMUST00000097625	ENSMUST00000097625_N3	ENSMUSG00000026335	Pam	69.9238
ENSMUST00000097632	ENSMUST00000097632_N5	ENSMUSG00000073608	Gal3st2c	4.00648
ENSMUST00000097722	ENSMUST00000097722_N2	ENSMUSG00000026031	Cflar	50.757	A3
ENSMUST00000097772	ENSMUST00000097772_N1	ENSMUSG00000026069	Il1rl1	7.47395	AF
ENSMUST00000097849	ENSMUST00000097849_N2	ENSMUSG00000073747	Gm7534	3.34281
ENSMUST00000098066	ENSMUST00000098066_N8	ENSMUSG00000089945	Pakap	37.1078	AF;SE
ENSMUST00000098402	ENSMUST00000098402_N10	ENSMUSG00000102252	Snrpn	0.895811
ENSMUST00000098402	ENSMUST00000098402_N9	ENSMUSG00000102252	Snrpn	0.71132	AF;SE
ENSMUST00000098545	ENSMUST00000098545_N1	ENSMUSG00000019437	Tlcd1	2.16359
ENSMUST00000098630	ENSMUST00000098630_N1	ENSMUSG00000074240	Cib3	19.0987
ENSMUST00000098682	ENSMUST00000098682_N18	ENSMUSG00000037716	Ccdc33	1.97259	A5
ENSMUST00000098842	ENSMUST00000098842_N3	ENSMUSG00000031577	Tti2	0.912402	RI
ENSMUST00000098845	ENSMUST00000098845_N10	ENSMUSG00000035203	Epn1	7.1827
ENSMUST00000098908	ENSMUST00000098908_N1	ENSMUSG00000074454	Defb33	0.36105
ENSMUST00000099087	ENSMUST00000099087_N4	ENSMUSG00000027763	Mbnl1	0	AF;SE
ENSMUST00000099147	ENSMUST00000099147_N1	ENSMUSG00000074634	Tmem267	0
ENSMUST00000099172	ENSMUST00000099172_N1	ENSMUSG00000074657	Kif5a	0.667826	A3;A5
ENSMUST00000099197	ENSMUST00000099197_N2	ENSMUSG00000074673	Ttll9	11.5695
ENSMUST00000099206	ENSMUST00000099206_N1	ENSMUSG00000074681	Defb23	1.24745
ENSMUST00000099428	ENSMUST00000099428_N10	ENSMUSG00000074852	Hpse2	1.22752	A5;SE
ENSMUST00000099428	ENSMUST00000099428_N7	ENSMUSG00000074852	Hpse2	1.43393	AF;SE
ENSMUST00000099490	ENSMUST00000099490_N12	ENSMUSG00000021488	Nsd1	14.0036	SE
ENSMUST00000099490	ENSMUST00000099490_N14	ENSMUSG00000021488	Nsd1	2.01368	SE
ENSMUST00000099490	ENSMUST00000099490_N17	ENSMUSG00000021488	Nsd1	2.72e-06
ENSMUST00000099490	ENSMUST00000099490_N2	ENSMUSG00000021488	Nsd1	2.72e-06	SE
ENSMUST00000099490	ENSMUST00000099490_N13	ENSMUSG00000021488	Nsd1	21.6675
ENSMUST00000099663	ENSMUST00000099663_N1	ENSMUSG00000075002	Gm813	0
ENSMUST00000099684	ENSMUST00000099684_N2	ENSMUSG00000075015	Gm10801	2.29035
ENSMUST00000099714	ENSMUST00000099714_N1	ENSMUSG00000075040	Zfp408	6.74513	A5
ENSMUST00000099816	ENSMUST00000099816_N2	ENSMUSG00000075122	Cd80	46.4783	SE
ENSMUST00000099816	ENSMUST00000099816_N4	ENSMUSG00000075122	Cd80	43.2134
ENSMUST00000099816	ENSMUST00000099816_N3	ENSMUSG00000075122	Cd80	5.81733
ENSMUST00000100026	ENSMUST00000100026_N4	ENSMUSG00000038127	Ccdc50	42.122	SE
ENSMUST00000100179	ENSMUST00000100179_N1	ENSMUSG00000075402	Krt76	20.9164
ENSMUST00000100203	ENSMUST00000100203_N2	ENSMUSG00000023026	Dip2b	0.589966
ENSMUST00000100377	ENSMUST00000100377_N3	ENSMUSG00000058099	Nfam1	0
ENSMUST00000100467	ENSMUST00000100467_N1	ENSMUSG00000045482	Trrap	0	A3
ENSMUST00000100467	ENSMUST00000100467_N18	ENSMUSG00000045482	Trrap	0	A5;SE
ENSMUST00000100487	ENSMUST00000100487_N3	ENSMUSG00000029613	Eif2ak1	2.28493
ENSMUST00000100505	ENSMUST00000100505_N6	ENSMUSG00000000148	Brat1	0
ENSMUST00000100700	ENSMUST00000100700_N3	ENSMUSG00000072612	Gm10382	37.3271
ENSMUST00000100700	ENSMUST00000100700_N7	ENSMUSG00000072612	Gm10382	5.40569	A3
ENSMUST00000100765	ENSMUST00000100765_N2	ENSMUSG00000032712	2810474O19Rik	4.77389	AF;RI
ENSMUST00000100765	ENSMUST00000100765_N4	ENSMUSG00000032712	2810474O19Rik	2.00614	SE
ENSMUST00000100848	ENSMUST00000100848_N1	ENSMUSG00000072693	Gm10401	4.562
ENSMUST00000100857	ENSMUST00000100857_N4	ENSMUSG00000030203	Dusp16	2.45843	A5;AF
ENSMUST00000100857	ENSMUST00000100857_N6	ENSMUSG00000030203	Dusp16	1.34416	AF;SE
ENSMUST00000101217	ENSMUST00000101217_N2	ENSMUSG00000072945	Ripply1	1.72257
ENSMUST00000101552	ENSMUST00000101552_N1	ENSMUSG00000073173	Gm10477	3.82897
ENSMUST00000102491	ENSMUST00000102491_N12	ENSMUSG00000040860	Crocc	0	A5;RI
ENSMUST00000102547	ENSMUST00000102547_N6	ENSMUSG00000044042	Fmn1	5.76471	A5
ENSMUST00000102582	ENSMUST00000102582_N8	ENSMUSG00000042010	Acacb	11.3083
ENSMUST00000102582	ENSMUST00000102582_N6	ENSMUSG00000042010	Acacb	3.77216	A5
ENSMUST00000102597	ENSMUST00000102597_N1	ENSMUSG00000028800	Hdac1	61.7308
ENSMUST00000102598	ENSMUST00000102598_N1	ENSMUSG00000057236	Rbbp4	3.67297
ENSMUST00000102637	ENSMUST00000102637_N10	ENSMUSG00000027889	Ampd2	0.1447	RI
ENSMUST00000102642	ENSMUST00000102642_N1	ENSMUSG00000027078	Ube2l6	5.00219
ENSMUST00000102678	ENSMUST00000102678_N5	ENSMUSG00000067212	H2-T23	0
ENSMUST00000102692	ENSMUST00000102692_N2	ENSMUSG00000000301	Pemt	2.42782	AF
ENSMUST00000102709	ENSMUST00000102709_N3	ENSMUSG00000027048	Abcb11	4.22746	AF
ENSMUST00000102721	ENSMUST00000102721_N3	ENSMUSG00000028544	Slc5a9	7.10572	A3
ENSMUST00000102731	ENSMUST00000102731_N4	ENSMUSG00000020400	Tnip1	202.468
ENSMUST00000102732	ENSMUST00000102732_N1	ENSMUSG00000000392	Fap	4.65039
ENSMUST00000102782	ENSMUST00000102782_N1	ENSMUSG00000078193	Gm2000	543.917
ENSMUST00000102886	ENSMUST00000102886_N3	ENSMUSG00000009614	Sardh	3.99908
ENSMUST00000102963	ENSMUST00000102963_N1	ENSMUSG00000061322	Dnaic1	4.29144
ENSMUST00000103060	ENSMUST00000103060_N2	ENSMUSG00000041895	Wipi1	8.70063
ENSMUST00000103060	ENSMUST00000103060_N1	ENSMUSG00000041895	Wipi1	6.50661	A5;RI
ENSMUST00000103071	ENSMUST00000103071_N2	ENSMUSG00000020713	Gh	5.60255
ENSMUST00000103071	ENSMUST00000103071_N4	ENSMUSG00000020713	Gh	2.50506
ENSMUST00000103071	ENSMUST00000103071_N5	ENSMUSG00000020713	Gh	3.71167
ENSMUST00000103109	ENSMUST00000103109_N1	ENSMUSG00000017167	Cntnap1	1.7686	RI
ENSMUST00000103177	ENSMUST00000103177_N1	ENSMUSG00000009356	Lpo	139.254	AF
ENSMUST00000103177	ENSMUST00000103177_N2	ENSMUSG00000009356	Lpo	13.3396
ENSMUST00000103177	ENSMUST00000103177_N4	ENSMUSG00000009356	Lpo	80.4371
ENSMUST00000103177	ENSMUST00000103177_N5	ENSMUSG00000009356	Lpo	3.4391
ENSMUST00000103177	ENSMUST00000103177_N3	ENSMUSG00000009356	Lpo	17.3117	A3
ENSMUST00000103241	ENSMUST00000103241_N8	ENSMUSG00000027200	Sema6d	0	A5;SE
ENSMUST00000104958	ENSMUST00000104958_N1	ENSMUSG00000078153	Psme2b	0.347601
ENSMUST00000105263	ENSMUST00000105263_N3	ENSMUSG00000020184	Mdm2	0	A5;RI
ENSMUST00000105286	ENSMUST00000105286_N2	ENSMUSG00000019932	Kera	3.96723	AF;SE
ENSMUST00000105300	ENSMUST00000105300_N5	ENSMUSG00000020053	Igf1	13.4472
ENSMUST00000105401	ENSMUST00000105401_N2	ENSMUSG00000009292	Trpm2	7.2762	A3;RI
ENSMUST00000105617	ENSMUST00000105617_N4	ENSMUSG00000064065	Ipcef1	11.1828
ENSMUST00000105780	ENSMUST00000105780_N5	ENSMUSG00000051435	Fhad1	6.7044	A5;AF
ENSMUST00000105780	ENSMUST00000105780_N9	ENSMUSG00000051435	Fhad1	13.093	A3
ENSMUST00000105786	ENSMUST00000105786_N3	ENSMUSG00000040761	Spen	6.6426
ENSMUST00000105799	ENSMUST00000105799_N7	ENSMUSG00000040964	Arhgef10l	9.18679	AF
ENSMUST00000105831	ENSMUST00000105831_N18	ENSMUSG00000028760	Eif4g3	3.14623
ENSMUST00000105874	ENSMUST00000105874_N6	ENSMUSG00000028836	Slc30a2	14.7428	A5;RI
ENSMUST00000105874	ENSMUST00000105874_N9	ENSMUSG00000028836	Slc30a2	1.74701	A5;RI
ENSMUST00000105920	ENSMUST00000105920_N1	ENSMUSG00000045752	Tssc4	2.11173
ENSMUST00000106027	ENSMUST00000106027_N2	ENSMUSG00000038611	Phrf1	3.78062	A5
ENSMUST00000106072	ENSMUST00000106072_N6	ENSMUSG00000028799	Zfp362	7.05806	AF
ENSMUST00000106098	ENSMUST00000106098_N3	ENSMUSG00000025477	Inpp5a	0
ENSMUST00000106251	ENSMUST00000106251_N6	ENSMUSG00000030795	Fus	0	RI
ENSMUST00000106308	ENSMUST00000106308_N2	ENSMUSG00000033987	Dnah17	2.37257	AF
ENSMUST00000106554	ENSMUST00000106554_N18	ENSMUSG00000020734	Grin2c	0	A3;RI;SE
ENSMUST00000106554	ENSMUST00000106554_N21	ENSMUSG00000020734	Grin2c	59.8546
ENSMUST00000106554	ENSMUST00000106554_N4	ENSMUSG00000020734	Grin2c	10.7371	A3;RI
ENSMUST00000106554	ENSMUST00000106554_N5	ENSMUSG00000020734	Grin2c	6.34351	A3;RI
ENSMUST00000106565	ENSMUST00000106565_N1	ENSMUSG00000055960	Skint4	53.4597
ENSMUST00000106565	ENSMUST00000106565_N2	ENSMUSG00000055960	Skint4	0	AF
ENSMUST00000106565	ENSMUST00000106565_N3	ENSMUSG00000055960	Skint4	23.8608
ENSMUST00000106565	ENSMUST00000106565_N5	ENSMUSG00000055960	Skint4	7.4838
ENSMUST00000106565	ENSMUST00000106565_N6	ENSMUSG00000055960	Skint4	8.80637
ENSMUST00000106565	ENSMUST00000106565_N4	ENSMUSG00000055960	Skint4	7.58381	SE
ENSMUST00000106763	ENSMUST00000106763_N9	ENSMUSG00000040481	Bptf	0.458971
ENSMUST00000106774	ENSMUST00000106774_N3	ENSMUSG00000002227	Mov10	4.63421
ENSMUST00000106839	ENSMUST00000106839_N4	ENSMUSG00000066258	Trim12a	3.38469
ENSMUST00000106903	ENSMUST00000106903_N5	ENSMUSG00000001901	Kcnh6	29.1888	A3
ENSMUST00000106903	ENSMUST00000106903_N3	ENSMUSG00000001901	Kcnh6	3.94637	AL
ENSMUST00000106972	ENSMUST00000106972_N11	ENSMUSG00000018412	Kansl1	0.463026
ENSMUST00000107196	ENSMUST00000107196_N7	ENSMUSG00000052572	Dlg2	17.0756
ENSMUST00000107289	ENSMUST00000107289_N8	ENSMUSG00000028399	Ptprd	0	A3;RI
ENSMUST00000107330	ENSMUST00000107330_N1	ENSMUSG00000105518	Gm42674	9.41086	A3;RI
ENSMUST00000107330	ENSMUST00000107330_N3	ENSMUSG00000105518	Gm42674	4.36859
ENSMUST00000107330	ENSMUST00000107330_N5	ENSMUSG00000105518	Gm42674	21.1061	A5;RI;SE
ENSMUST00000107330	ENSMUST00000107330_N7	ENSMUSG00000105518	Gm42674	7.23061	A5
ENSMUST00000107330	ENSMUST00000107330_N9	ENSMUSG00000105518	Gm42674	94.7742
ENSMUST00000107330	ENSMUST00000107330_N6	ENSMUSG00000105518	Gm42674	6.2598	A5;SE
ENSMUST00000107704	ENSMUST00000107704_N1	ENSMUSG00000039693	Msantd3	0.468945	SE
ENSMUST00000107737	ENSMUST00000107737_N1	ENSMUSG00000057342	Sphk2	30.09
ENSMUST00000107927	ENSMUST00000107927_N1	ENSMUSG00000051113	Fam71e1	4.1488	AL
ENSMUST00000107968	ENSMUST00000107968_N1	ENSMUSG00000050063	Klk6	19.5622
ENSMUST00000108037	ENSMUST00000108037_N1	ENSMUSG00000073888	Ccl27a	10.0571
ENSMUST00000108122	ENSMUST00000108122_N3	ENSMUSG00000045083	Lingo2	0.585112
ENSMUST00000108122	ENSMUST00000108122_N8	ENSMUSG00000045083	Lingo2	1.28253	A5;SE
ENSMUST00000108122	ENSMUST00000108122_N5	ENSMUSG00000045083	Lingo2	1.07649	SE
ENSMUST00000108292	ENSMUST00000108292_N1	ENSMUSG00000060791	Gmfg	0.131615	A5
ENSMUST00000108294	ENSMUST00000108294_N1	ENSMUSG00000002057	Foxn1	9.23071	RI
ENSMUST00000108294	ENSMUST00000108294_N3	ENSMUSG00000002057	Foxn1	3.95387	A5
ENSMUST00000108294	ENSMUST00000108294_N4	ENSMUSG00000002057	Foxn1	7.86401	A3;RI
ENSMUST00000108294	ENSMUST00000108294_N6	ENSMUSG00000002057	Foxn1	3.05717
ENSMUST00000108294	ENSMUST00000108294_N2	ENSMUSG00000002057	Foxn1	26.1745
ENSMUST00000108304	ENSMUST00000108304_N2	ENSMUSG00000028214	Gem	20.7253
ENSMUST00000108346	ENSMUST00000108346_N1	ENSMUSG00000047213	Ythdf3	0	A3;A5;RI
ENSMUST00000108402	ENSMUST00000108402_N1	ENSMUSG00000020838	Slc6a4	4.57982	AF
ENSMUST00000108615	ENSMUST00000108615_N2	ENSMUSG00000089942	Pira2	3.81488
ENSMUST00000108660	ENSMUST00000108660_N9	ENSMUSG00000044795	Cyb5d1	1.37327	RI
ENSMUST00000108661	ENSMUST00000108661_N3	ENSMUSG00000018474	Chd3	40.1091	A5
ENSMUST00000108689	ENSMUST00000108689_N1	ENSMUSG00000020908	Myh3	0.921118	RI
ENSMUST00000109353	ENSMUST00000109353_N4	ENSMUSG00000051786	Tubgcp6	0
ENSMUST00000109443	ENSMUST00000109443_N11	ENSMUSG00000053141	Ptprt	0	A5
ENSMUST00000109443	ENSMUST00000109443_N4	ENSMUSG00000053141	Ptprt	0
ENSMUST00000109485	ENSMUST00000109485_N2	ENSMUSG00000027652	Ralgapb	0
ENSMUST00000109605	ENSMUST00000109605_N1	ENSMUSG00000042406	Atf4	118.109
ENSMUST00000109620	ENSMUST00000109620_N5	ENSMUSG00000009585	Apobec3	9.82499	A3;SE
ENSMUST00000109957	ENSMUST00000109957_N1	ENSMUSG00000079013	Serpina3j	22.8508	AF;SE
ENSMUST00000109957	ENSMUST00000109957_N3	ENSMUSG00000079013	Serpina3j	26.5119
ENSMUST00000109957	ENSMUST00000109957_N4	ENSMUSG00000079013	Serpina3j	60.9943
ENSMUST00000109958	ENSMUST00000109958_N3	ENSMUSG00000079014	Serpina3i	13.9476	A5
ENSMUST00000109958	ENSMUST00000109958_N4	ENSMUSG00000079014	Serpina3i	28.0144	RI
ENSMUST00000109958	ENSMUST00000109958_N5	ENSMUSG00000079014	Serpina3i	13.1325	A5
ENSMUST00000109958	ENSMUST00000109958_N1	ENSMUSG00000079014	Serpina3i	5.18926	A5
ENSMUST00000110064	ENSMUST00000110064_N4	ENSMUSG00000068205	Macrod2	0
ENSMUST00000110097	ENSMUST00000110097_N2	ENSMUSG00000037989	Wnk2	5.47611
ENSMUST00000110097	ENSMUST00000110097_N9	ENSMUSG00000037989	Wnk2	1.45834	SE
ENSMUST00000110103	ENSMUST00000110103_N3	ENSMUSG00000038508	Gdf15	0	SE
ENSMUST00000110109	ENSMUST00000110109_N6	ENSMUSG00000039943	Plcb4	5.5966	SE
ENSMUST00000110142	ENSMUST00000110142_N5	ENSMUSG00000027346	Gpcpd1	2.70947	AF
ENSMUST00000110186	ENSMUST00000110186_N1	ENSMUSG00000027333	Smox	0
ENSMUST00000110275	ENSMUST00000110275_N1	ENSMUSG00000069248	Serpinb6e	4.80093
ENSMUST00000110276	ENSMUST00000110276_N1	ENSMUSG00000021235	Coq6	0.955796
ENSMUST00000110297	ENSMUST00000110297_N1	ENSMUSG00000022307	Oxr1	0	AF
ENSMUST00000110299	ENSMUST00000110299_N2	ENSMUSG00000027401	Tgm3	1.72491
ENSMUST00000110366	ENSMUST00000110366_N2	ENSMUSG00000034800	Zfp661	2.67914	RI
ENSMUST00000110366	ENSMUST00000110366_N4	ENSMUSG00000034800	Zfp661	1.65414	A5;RI
ENSMUST00000110366	ENSMUST00000110366_N5	ENSMUSG00000034800	Zfp661	3.73928	A5;RI
ENSMUST00000110376	ENSMUST00000110376_N1	ENSMUSG00000031631	Cfap97	0
ENSMUST00000110494	ENSMUST00000110494_N4	ENSMUSG00000027202	Slc12a1	3.36119
ENSMUST00000110611	ENSMUST00000110611_N2	ENSMUSG00000096527	Gm6370	1.07683
ENSMUST00000110617	ENSMUST00000110617_N5	ENSMUSG00000039801	2410089E03Rik	0.801496
ENSMUST00000110648	ENSMUST00000110648_N7	ENSMUSG00000043909	Trp53bp1	7.61072
ENSMUST00000110679	ENSMUST00000110679_N4	ENSMUSG00000041625	Ggact	4.15705	RI
ENSMUST00000110746	ENSMUST00000110746_N1	ENSMUSG00000089922	Gm43517	0
ENSMUST00000110746	ENSMUST00000110746_N3	ENSMUSG00000089922	Gm43517	0.430418
ENSMUST00000110763	ENSMUST00000110763_N1	ENSMUSG00000039785	Defb5	8.03118
ENSMUST00000110893	ENSMUST00000110893_N9	ENSMUSG00000026632	Tatdn3	0.974714	RI
ENSMUST00000110896	ENSMUST00000110896_N3	ENSMUSG00000025856	Pdgfa	1.929
ENSMUST00000111296	ENSMUST00000111296_N1	ENSMUSG00000013997	Nit1	4.43222
ENSMUST00000111303	ENSMUST00000111303_N1	ENSMUSG00000040479	Dgkz	2.11826
ENSMUST00000111325	ENSMUST00000111325_N2	ENSMUSG00000022223	Sdr39u1	3.66618	A3
ENSMUST00000111738	ENSMUST00000111738_N2	ENSMUSG00000038593	Tctn1	0	RI
ENSMUST00000111738	ENSMUST00000111738_N5	ENSMUSG00000038593	Tctn1	0
ENSMUST00000111773	ENSMUST00000111773_N5	ENSMUSG00000039607	Rbms3	0	MX
ENSMUST00000111825	ENSMUST00000111825_N5	ENSMUSG00000063975	Slco1a5	4.50518
ENSMUST00000111825	ENSMUST00000111825_N3	ENSMUSG00000063975	Slco1a5	1.19174	AF
ENSMUST00000111827	ENSMUST00000111827_N2	ENSMUSG00000079262	Slco1a6	0.843278
ENSMUST00000111913	ENSMUST00000111913_N1	ENSMUSG00000006010	BC003331	4.55766
ENSMUST00000111956	ENSMUST00000111956_N4	ENSMUSG00000063506	Arhgap22	13.2042
ENSMUST00000112098	ENSMUST00000112098_N9	ENSMUSG00000042323	Pbrm1	0
ENSMUST00000112110	ENSMUST00000112110_N1	ENSMUSG00000079299	Klrb1	2.37898	AF
ENSMUST00000112254	ENSMUST00000112254_N1	ENSMUSG00000001930	Vwf	3.75251	A5
ENSMUST00000112254	ENSMUST00000112254_N2	ENSMUSG00000001930	Vwf	0	A5;SE
ENSMUST00000112254	ENSMUST00000112254_N4	ENSMUSG00000001930	Vwf	0
ENSMUST00000112336	ENSMUST00000112336_N1	ENSMUSG00000042240	Crybb2	5.19774
ENSMUST00000112550	ENSMUST00000112550_N9	ENSMUSG00000026987	Baz2b	2.39978
ENSMUST00000112576	ENSMUST00000112576_N3	ENSMUSG00000016498	Pdcd1lg2	2.77331
ENSMUST00000112586	ENSMUST00000112586_N9	ENSMUSG00000040613	Apobec1	4.80115	A3
ENSMUST00000112588	ENSMUST00000112588_N3	ENSMUSG00000025332	Kdm5c	3.00252	RI
ENSMUST00000112606	ENSMUST00000112606_N3	ENSMUSG00000036815	Dpp10	8.67234	SE
ENSMUST00000112606	ENSMUST00000112606_N4	ENSMUSG00000036815	Dpp10	5.12942	SE
ENSMUST00000112606	ENSMUST00000112606_N5	ENSMUSG00000036815	Dpp10	55.1404	RI
ENSMUST00000112606	ENSMUST00000112606_N7	ENSMUSG00000036815	Dpp10	10.8377	SE
ENSMUST00000112606	ENSMUST00000112606_N6	ENSMUSG00000036815	Dpp10	5.83524	AF
ENSMUST00000112644	ENSMUST00000112644_N4	ENSMUSG00000026388	3110009E18Rik	3.78716
ENSMUST00000112644	ENSMUST00000112644_N5	ENSMUSG00000026388	3110009E18Rik	24.6163
ENSMUST00000112680	ENSMUST00000112680_N6	ENSMUSG00000024044	Epb41l3	24.0063
ENSMUST00000112930	ENSMUST00000112930_N1	ENSMUSG00000031274	Col4a5	2.99746	AF
ENSMUST00000112930	ENSMUST00000112930_N2	ENSMUSG00000031274	Col4a5	2.77442	RI
ENSMUST00000112969	ENSMUST00000112969_N1	ENSMUSG00000055725	Paqr3	11.6629
ENSMUST00000113200	ENSMUST00000113200_N1	ENSMUSG00000026792	Lrsam1	5.72347	RI;SE
ENSMUST00000113235	ENSMUST00000113235_N2	ENSMUSG00000026254	Eif4e2	0
ENSMUST00000113265	ENSMUST00000113265_N6	ENSMUSG00000023991	Foxp4	0	A5
ENSMUST00000113332	ENSMUST00000113332_N1	ENSMUSG00000039205	Ciz1	1.25443
ENSMUST00000113434	ENSMUST00000113434_N1	ENSMUSG00000079462	Gm15737	0.931404	AF
ENSMUST00000113465	ENSMUST00000113465_N4	ENSMUSG00000023968	Crip3	51.8216	RI
ENSMUST00000113465	ENSMUST00000113465_N6	ENSMUSG00000023968	Crip3	16.9035	A3;RI
ENSMUST00000113465	ENSMUST00000113465_N2	ENSMUSG00000023968	Crip3	9.31694	A3
ENSMUST00000113512	ENSMUST00000113512_N9	ENSMUSG00000073643	Wdfy1	2.06137
ENSMUST00000113523	ENSMUST00000113523_N8	ENSMUSG00000036026	Tmem63b	6.54175
ENSMUST00000113524	ENSMUST00000113524_N3	ENSMUSG00000012187	Mogat1	2.3711
ENSMUST00000113573	ENSMUST00000113573_N1	ENSMUSG00000031229	Atrx	8.37211	RI
ENSMUST00000113573	ENSMUST00000113573_N2	ENSMUSG00000031229	Atrx	0
ENSMUST00000113575	ENSMUST00000113575_N1	ENSMUSG00000051703	Tmem198	2.1983
ENSMUST00000113581	ENSMUST00000113581_N1	ENSMUSG00000033174	Mgll	3.16664	SE
ENSMUST00000113627	ENSMUST00000113627_N1	ENSMUSG00000079480	Pin4	5.17983	AF
ENSMUST00000113711	ENSMUST00000113711_N2	ENSMUSG00000039715	Wdr34	6.24321	SE
ENSMUST00000113718	ENSMUST00000113718_N1	ENSMUSG00000009670	Tex11	3.47269	A3
ENSMUST00000113846	ENSMUST00000113846_N5	ENSMUSG00000040732	Erg	0.78433	AF
ENSMUST00000113869	ENSMUST00000113869_N8	ENSMUSG00000026812	Tsc1	0	AF
ENSMUST00000113951	ENSMUST00000113951_N14	ENSMUSG00000022948	Setd4	0	SE
ENSMUST00000114000	ENSMUST00000114000_N3	ENSMUSG00000045103	Dmd	4.08e-06	AF
ENSMUST00000114039	ENSMUST00000114039_N1	ENSMUSG00000079522	Gm14744	1.95422
ENSMUST00000114124	ENSMUST00000114124_N1	ENSMUSG00000002489	Tiam1	8.62971
ENSMUST00000114175	ENSMUST00000114175_N4	ENSMUSG00000057246	BC051142	4.52512	AF
ENSMUST00000114299	ENSMUST00000114299_N3	ENSMUSG00000031328	Flna	1.23372
ENSMUST00000114327	ENSMUST00000114327_N3	ENSMUSG00000004347	Pde1c	2.81214
ENSMUST00000114366	ENSMUST00000114366_N1	ENSMUSG00000079554	Aox2	1.29909	RI
ENSMUST00000114455	ENSMUST00000114455_N4	ENSMUSG00000079563	Pglyrp2	11.6039	A5
ENSMUST00000114455	ENSMUST00000114455_N2	ENSMUSG00000079563	Pglyrp2	71.9272
ENSMUST00000114468	ENSMUST00000114468_N8	ENSMUSG00000029822	Osbpl3	20.7914	AF
ENSMUST00000114573	ENSMUST00000114573_N7	ENSMUSG00000034908	Sidt2	0.710656	RI
ENSMUST00000114594	ENSMUST00000114594_N3	ENSMUSG00000036591	Arhgap21	0.802673
ENSMUST00000114694	ENSMUST00000114694_N10	ENSMUSG00000022708	Zbtb20	1.83782
ENSMUST00000114700	ENSMUST00000114700_N6	ENSMUSG00000029165	Agbl5	1.36698
ENSMUST00000114729	ENSMUST00000114729_N1	ENSMUSG00000029168	Dpysl5	1.84039
ENSMUST00000114763	ENSMUST00000114763_N3	ENSMUSG00000022816	Fstl1	10.9193
ENSMUST00000114848	ENSMUST00000114848_N3	ENSMUSG00000024218	Taf11	1.34648	A5
ENSMUST00000115027	ENSMUST00000115027_N4	ENSMUSG00000029761	Cald1	3.76211
ENSMUST00000115181	ENSMUST00000115181_N9	ENSMUSG00000024170	Telo2	0	A3;RI
ENSMUST00000115274	ENSMUST00000115274_N2	ENSMUSG00000024620	Pdgfrb	13.2731
ENSMUST00000115274	ENSMUST00000115274_N1	ENSMUSG00000024620	Pdgfrb	3.88863	A5;SE
ENSMUST00000115640	ENSMUST00000115640_N2	ENSMUSG00000022721	Trmt2a	0	A3;AF;RI;SE
ENSMUST00000115640	ENSMUST00000115640_N8	ENSMUSG00000022721	Trmt2a	1.76119	A3;RI;SE
ENSMUST00000115644	ENSMUST00000115644_N6	ENSMUSG00000036912	Piwil4	1.81069	A3;SE
ENSMUST00000115746	ENSMUST00000115746_N3	ENSMUSG00000004317	Clcn5	2.61121	A5;SE
ENSMUST00000115781	ENSMUST00000115781_N6	ENSMUSG00000005871	Apc	1.36e-06	AF
ENSMUST00000115904	ENSMUST00000115904_N1	ENSMUSG00000096506	CR974586.5	0
ENSMUST00000116257	ENSMUST00000116257_N1	ENSMUSG00000028965	Tnfrsf9	35.7753
ENSMUST00000116371	ENSMUST00000116371_N15	ENSMUSG00000005417	Mprip	0.902624
ENSMUST00000116371	ENSMUST00000116371_N14	ENSMUSG00000005417	Mprip	25.6601
ENSMUST00000116402	ENSMUST00000116402_N2	ENSMUSG00000021255	Esrrb	0.76744	AF
ENSMUST00000117620	ENSMUST00000117620_N3	ENSMUSG00000031933	Izumo1r	0
ENSMUST00000117648	ENSMUST00000117648_N4	ENSMUSG00000040785	Ttc3	0
ENSMUST00000118000	ENSMUST00000118000_N3	ENSMUSG00000002459	Rgs20	1.73744	A5;SE
ENSMUST00000118125	ENSMUST00000118125_N3	ENSMUSG00000074141	Il4i1	9.80096	RI
ENSMUST00000118163	ENSMUST00000118163_N2	ENSMUSG00000041268	Dmxl2	2.66484
ENSMUST00000118207	ENSMUST00000118207_N2	ENSMUSG00000026592	Tex35	1.12537
ENSMUST00000118408	ENSMUST00000118408_N8	ENSMUSG00000051000	Fam160a1	10.7801	A3;SE
ENSMUST00000118429	ENSMUST00000118429_N2	ENSMUSG00000047554	Tmem41b	0.331916
ENSMUST00000118466	ENSMUST00000118466_N6	ENSMUSG00000021792	Fam213a	2.56807
ENSMUST00000118466	ENSMUST00000118466_N2	ENSMUSG00000021792	Fam213a	3.01795	A3
ENSMUST00000118729	ENSMUST00000118729_N4	ENSMUSG00000046897	Zfp740	0	RI
ENSMUST00000119068	ENSMUST00000119068_N2	ENSMUSG00000054162	Spock3	18.1693
ENSMUST00000119109	ENSMUST00000119109_N7	ENSMUSG00000003382	Etv3	19.7039	A5
ENSMUST00000119109	ENSMUST00000119109_N2	ENSMUSG00000003382	Etv3	1.54034
ENSMUST00000119455	ENSMUST00000119455_N5	ENSMUSG00000050106	Tmc8	0	RI
ENSMUST00000119870	ENSMUST00000119870_N5	ENSMUSG00000031789	Cngb1	3.582
ENSMUST00000119975	ENSMUST00000119975_N3	ENSMUSG00000029022	Miip	0	AF
ENSMUST00000120095	ENSMUST00000120095_N1	ENSMUSG00000028391	Wdr31	1.26794
ENSMUST00000120157	ENSMUST00000120157_N2	ENSMUSG00000028657	Ppt1	5.53076	A3
ENSMUST00000120157	ENSMUST00000120157_N4	ENSMUSG00000028657	Ppt1	1.81047	A3;A5
ENSMUST00000120157	ENSMUST00000120157_N5	ENSMUSG00000028657	Ppt1	5.14594	A5
ENSMUST00000120381	ENSMUST00000120381_N1	ENSMUSG00000032116	Stt3a	24.4647
ENSMUST00000120638	ENSMUST00000120638_N5	ENSMUSG00000059602	Syn3	9.14557
ENSMUST00000120834	ENSMUST00000120834_N3	ENSMUSG00000027695	Pld1	56.567
ENSMUST00000120936	ENSMUST00000120936_N1	ENSMUSG00000024979	Tectb	4.48713
ENSMUST00000121040	ENSMUST00000121040_N1	ENSMUSG00000026420	Il24	4.58019	A3
ENSMUST00000121114	ENSMUST00000121114_N2	ENSMUSG00000027075	Slc43a1	2.37093	A5
ENSMUST00000121325	ENSMUST00000121325_N1	ENSMUSG00000019817	Plagl1	0.479977
ENSMUST00000121325	ENSMUST00000121325_N2	ENSMUSG00000019817	Plagl1	2.06887	RI
ENSMUST00000121325	ENSMUST00000121325_N3	ENSMUSG00000019817	Plagl1	5.33424	RI
ENSMUST00000121634	ENSMUST00000121634_N5	ENSMUSG00000032064	Dixdc1	0.877936	AF
ENSMUST00000121995	ENSMUST00000121995_N1	ENSMUSG00000081512	Gm15821	18.2907
ENSMUST00000121995	ENSMUST00000121995_N3	ENSMUSG00000081512	Gm15821	0
ENSMUST00000121995	ENSMUST00000121995_N4	ENSMUSG00000081512	Gm15821	10.9955	A3
ENSMUST00000121995	ENSMUST00000121995_N5	ENSMUSG00000081512	Gm15821	5.6273	A5;RI
ENSMUST00000122367	ENSMUST00000122367_N1	ENSMUSG00000074764	Sel1l2	0	A3;RI;SE
ENSMUST00000122367	ENSMUST00000122367_N5	ENSMUSG00000074764	Sel1l2	3.00013	A5;RI
ENSMUST00000122375	ENSMUST00000122375_N2	ENSMUSG00000042532	Golga7b	9.14932	AF;SE
ENSMUST00000122375	ENSMUST00000122375_N5	ENSMUSG00000042532	Golga7b	1.7126	SE
ENSMUST00000122375	ENSMUST00000122375_N4	ENSMUSG00000042532	Golga7b	2.11513
ENSMUST00000123128	ENSMUST00000123128_N2	ENSMUSG00000034593	Myo5a	4.52858
ENSMUST00000123502	ENSMUST00000123502_N4	ENSMUSG00000024018	Ccdc167	1.68453	A5
ENSMUST00000123682	ENSMUST00000123682_N4	ENSMUSG00000055923	Aasdh	3.71042
ENSMUST00000123922	ENSMUST00000123922_N9	ENSMUSG00000048175	Asb8	0.719587	A5
ENSMUST00000123941	ENSMUST00000123941_N7	ENSMUSG00000015942	Gtf2ird2	20.2905
ENSMUST00000123989	ENSMUST00000123989_N2	ENSMUSG00000024013	Fgd2	0	A3;SE
ENSMUST00000124226	ENSMUST00000124226_N1	ENSMUSG00000049804	Armcx4	2.22637
ENSMUST00000124226	ENSMUST00000124226_N3	ENSMUSG00000049804	Armcx4	3.21042	AF;RI
ENSMUST00000124270	ENSMUST00000124270_N3	ENSMUSG00000053702	Nebl	6.64404
ENSMUST00000124452	ENSMUST00000124452_N1	ENSMUSG00000086322	E130218I03Rik	1.35816
ENSMUST00000124558	ENSMUST00000124558_N1	ENSMUSG00000042641	Rgsl1	0.50065
ENSMUST00000124665	ENSMUST00000124665_N4	ENSMUSG00000051855	Mest	1.36497
ENSMUST00000124888	ENSMUST00000124888_N10	ENSMUSG00000057554	Lgals8	0	A5
ENSMUST00000125209	ENSMUST00000125209_N4	ENSMUSG00000021596	Mctp1	19.2906	AF;SE
ENSMUST00000125209	ENSMUST00000125209_N5	ENSMUSG00000021596	Mctp1	0	AF
ENSMUST00000125209	ENSMUST00000125209_N7	ENSMUSG00000021596	Mctp1	0.691246	SE
ENSMUST00000125704	ENSMUST00000125704_N3	ENSMUSG00000020083	Fam241b	2.04932	AF
ENSMUST00000126291	ENSMUST00000126291_N2	ENSMUSG00000034785	Dio1	15.6762	A5
ENSMUST00000126391	ENSMUST00000126391_N12	ENSMUSG00000018920	Cxcl16	33.9401	RI
ENSMUST00000127460	ENSMUST00000127460_N2	ENSMUSG00000023235	Ccl25	5.14513
ENSMUST00000127460	ENSMUST00000127460_N7	ENSMUSG00000023235	Ccl25	4.08054	A5
ENSMUST00000128402	ENSMUST00000128402_N6	ENSMUSG00000021294	Kif26a	5.51966	RI
ENSMUST00000128402	ENSMUST00000128402_N5	ENSMUSG00000021294	Kif26a	9.21074	A5
ENSMUST00000129150	ENSMUST00000129150_N1	ENSMUSG00000070806	Zmynd12	2.01213
ENSMUST00000129150	ENSMUST00000129150_N2	ENSMUSG00000070806	Zmynd12	2.78524	A3
ENSMUST00000129150	ENSMUST00000129150_N3	ENSMUSG00000070806	Zmynd12	2.37497	SE
ENSMUST00000129221	ENSMUST00000129221_N1	ENSMUSG00000000766	Oprm1	3.46498	A3
ENSMUST00000129221	ENSMUST00000129221_N3	ENSMUSG00000000766	Oprm1	0	A3
ENSMUST00000129829	ENSMUST00000129829_N11	ENSMUSG00000039997	Ifi203	10.8751	A5;AF;SE
ENSMUST00000129829	ENSMUST00000129829_N12	ENSMUSG00000039997	Ifi203	3.13801	A5;SE
ENSMUST00000130032	ENSMUST00000130032_N8	ENSMUSG00000032185	Carm1	2.36636	RI
ENSMUST00000130549	ENSMUST00000130549_N4	ENSMUSG00000025207	Sema4g	1.47856	RI;SE
ENSMUST00000130560	ENSMUST00000130560_N1	ENSMUSG00000022548	Apod	3.85805
ENSMUST00000132428	ENSMUST00000132428_N13	ENSMUSG00000035967	Ints6l	3.08008
ENSMUST00000133124	ENSMUST00000133124_N1	ENSMUSG00000027111	Itga6	0.244887
ENSMUST00000133150	ENSMUST00000133150_N2	ENSMUSG00000046311	Zfp62	1.95014	AF
ENSMUST00000133383	ENSMUST00000133383_N1	ENSMUSG00000000049	Apoh	5.66376
ENSMUST00000134365	ENSMUST00000134365_N1	ENSMUSG00000049421	Zfp260	6.51336	AF;RI
ENSMUST00000135006	ENSMUST00000135006_N1	ENSMUSG00000020950	Foxg1	0.129129
ENSMUST00000135276	ENSMUST00000135276_N2	ENSMUSG00000059305	Vpreb1	1.361
ENSMUST00000135316	ENSMUST00000135316_N2	ENSMUSG00000000730	Dnmt3l	13.8549	A5;RI;SE
ENSMUST00000135316	ENSMUST00000135316_N3	ENSMUSG00000000730	Dnmt3l	26.8264	RI
ENSMUST00000135316	ENSMUST00000135316_N4	ENSMUSG00000000730	Dnmt3l	14.9977
ENSMUST00000135528	ENSMUST00000135528_N1	ENSMUSG00000034842	Art3	8.97928
ENSMUST00000136048	ENSMUST00000136048_N2	ENSMUSG00000036270	Edc4	0	RI
ENSMUST00000136312	ENSMUST00000136312_N25	ENSMUSG00000008348	Ubc	3.42135	MX;RI
ENSMUST00000136740	ENSMUST00000136740_N2	ENSMUSG00000039585	Myo9a	3.78196
ENSMUST00000137784	ENSMUST00000137784_N1	ENSMUSG00000068036	Afdn	19.4806	AF
ENSMUST00000138356	ENSMUST00000138356_N9	ENSMUSG00000048537	Phldb1	4.18591
ENSMUST00000138356	ENSMUST00000138356_N19	ENSMUSG00000048537	Phldb1	0	A5
ENSMUST00000138785	ENSMUST00000138785_N1	ENSMUSG00000000730	Dnmt3l	0.421844	A5;RI;SE
ENSMUST00000138785	ENSMUST00000138785_N2	ENSMUSG00000000730	Dnmt3l	2.98344	A5;RI
ENSMUST00000139302	ENSMUST00000139302_N11	ENSMUSG00000059208	Hnrnpm	0
ENSMUST00000139582	ENSMUST00000139582_N2	ENSMUSG00000035713	Usp35	0.967726	A3;RI
ENSMUST00000139624	ENSMUST00000139624_N10	ENSMUSG00000026825	Dnm1	0	A3;A5
ENSMUST00000140079	ENSMUST00000140079_N1	ENSMUSG00000033740	St18	0	AF
ENSMUST00000140222	ENSMUST00000140222_N7	ENSMUSG00000062609	Kcnj15	48.4807	SE
ENSMUST00000140466	ENSMUST00000140466_N7	ENSMUSG00000047193	Dync2h1	0	SE
ENSMUST00000140558	ENSMUST00000140558_N1	ENSMUSG00000015519	2310057J18Rik	1.28827	AF
ENSMUST00000140752	ENSMUST00000140752_N1	ENSMUSG00000046110	Serinc4	6.43495
ENSMUST00000140802	ENSMUST00000140802_N2	ENSMUSG00000047642	D930020B18Rik	0
ENSMUST00000142030	ENSMUST00000142030_N1	ENSMUSG00000034377	Tulp4	0	AF
ENSMUST00000142519	ENSMUST00000142519_N1	ENSMUSG00000030588	Yif1b	6.13499
ENSMUST00000142519	ENSMUST00000142519_N2	ENSMUSG00000030588	Yif1b	1.85129
ENSMUST00000143662	ENSMUST00000143662_N5	ENSMUSG00000043243	Fam129c	0	SE
ENSMUST00000143674	ENSMUST00000143674_N1	ENSMUSG00000026239	Pde6d	1.04768
ENSMUST00000143712	ENSMUST00000143712_N1	ENSMUSG00000042616	Oscp1	0.366944
ENSMUST00000143735	ENSMUST00000143735_N1	ENSMUSG00000000731	Aire	33.2906	AF;RI
ENSMUST00000143735	ENSMUST00000143735_N3	ENSMUSG00000000731	Aire	111.233	RI
ENSMUST00000143735	ENSMUST00000143735_N5	ENSMUSG00000000731	Aire	51.571	A3
ENSMUST00000143735	ENSMUST00000143735_N6	ENSMUSG00000000731	Aire	0
ENSMUST00000143735	ENSMUST00000143735_N7	ENSMUSG00000000731	Aire	35.0251	RI
ENSMUST00000143735	ENSMUST00000143735_N8	ENSMUSG00000000731	Aire	169.86
ENSMUST00000143735	ENSMUST00000143735_N4	ENSMUSG00000000731	Aire	38.0866	A5
ENSMUST00000143913	ENSMUST00000143913_N2	ENSMUSG00000039814	Xkr5	0
ENSMUST00000143913	ENSMUST00000143913_N1	ENSMUSG00000039814	Xkr5	2.08763	A5
ENSMUST00000144673	ENSMUST00000144673_N9	ENSMUSG00000093574	Gm20671	11.0247
ENSMUST00000145364	ENSMUST00000145364_N2	ENSMUSG00000037266	Rsrp1	0	A3;RI
ENSMUST00000146071	ENSMUST00000146071_N1	ENSMUSG00000027843	Ptpn22	2.442
ENSMUST00000146923	ENSMUST00000146923_N5	ENSMUSG00000024163	Mapk8ip3	2.91407	A3;RI
ENSMUST00000147604	ENSMUST00000147604_N5	ENSMUSG00000037860	Aim2	0
ENSMUST00000147724	ENSMUST00000147724_N2	ENSMUSG00000068039	Tcp1	4.70212
ENSMUST00000148517	ENSMUST00000148517_N3	ENSMUSG00000030116	Mfap5	0.509155
ENSMUST00000148602	ENSMUST00000148602_N1	ENSMUSG00000000416	Cttnbp2	7.16272
ENSMUST00000149040	ENSMUST00000149040_N2	ENSMUSG00000023939	Mrpl14	4.04245	A3;A5
ENSMUST00000150054	ENSMUST00000150054_N1	ENSMUSG00000057606	Colq	23.8032	SE
ENSMUST00000152054	ENSMUST00000152054_N1	ENSMUSG00000040521	Tsfm	4.02267
ENSMUST00000152681	ENSMUST00000152681_N8	ENSMUSG00000022214	Dcaf11	0	A5;RI
ENSMUST00000152831	ENSMUST00000152831_N8	ENSMUSG00000030302	Atp2b2	5.62409	AF
ENSMUST00000153148	ENSMUST00000153148_N2	ENSMUSG00000030032	Wdr54	4.18211
ENSMUST00000153627	ENSMUST00000153627_N1	ENSMUSG00000021177	Tdp1	29.0631	AF
ENSMUST00000154907	ENSMUST00000154907_N1	ENSMUSG00000038074	Fkbp14	1.75926
ENSMUST00000155014	ENSMUST00000155014_N2	ENSMUSG00000044037	Als2cl	1.68051	RI
ENSMUST00000155363	ENSMUST00000155363_N1	ENSMUSG00000038034	Igsf8	1.26207	RI
ENSMUST00000155363	ENSMUST00000155363_N2	ENSMUSG00000038034	Igsf8	0.532545	RI
ENSMUST00000156203	ENSMUST00000156203_N6	ENSMUSG00000042104	Uggt2	0	SE
ENSMUST00000156291	ENSMUST00000156291_N1	ENSMUSG00000024742	Fen1	10.7619
ENSMUST00000157072	ENSMUST00000157072_N4	ENSMUSG00000022838	Eaf2	1.06643	A5;AF
ENSMUST00000157072	ENSMUST00000157072_N5	ENSMUSG00000022838	Eaf2	2.03269	A5;AF
ENSMUST00000159229	ENSMUST00000159229_N1	ENSMUSG00000095577	Gm6619	2.12059
ENSMUST00000159514	ENSMUST00000159514_N2	ENSMUSG00000022698	Naa50	2.86387	A3
ENSMUST00000159572	ENSMUST00000159572_N1	ENSMUSG00000037847	Nmrk1	11.0618
ENSMUST00000159584	ENSMUST00000159584_N1	ENSMUSG00000090061	Nwd2	3.39571
ENSMUST00000159592	ENSMUST00000159592_N4	ENSMUSG00000042121	Ssh1	6.77656	AF
ENSMUST00000159747	ENSMUST00000159747_N1	ENSMUSG00000037509	Arhgef4	1.55688
ENSMUST00000159945	ENSMUST00000159945_N2	ENSMUSG00000033210	Slc9c1	2.77441
ENSMUST00000159945	ENSMUST00000159945_N4	ENSMUSG00000033210	Slc9c1	7.12493
ENSMUST00000159993	ENSMUST00000159993_N3	ENSMUSG00000079022	Col22a1	11.6485	SE
ENSMUST00000160027	ENSMUST00000160027_N4	ENSMUSG00000060073	Psma3	11.6143	A5
ENSMUST00000160147	ENSMUST00000160147_N9	ENSMUSG00000032295	Man2c1	0.576738	AF
ENSMUST00000160495	ENSMUST00000160495_N1	ENSMUSG00000040113	Mettl11b	1.90023
ENSMUST00000160495	ENSMUST00000160495_N2	ENSMUSG00000040113	Mettl11b	0.818397	A3
ENSMUST00000160496	ENSMUST00000160496_N2	ENSMUSG00000038115	Ano2	2.33832
ENSMUST00000160834	ENSMUST00000160834_N1	ENSMUSG00000073664	Nbeal1	4.66943
ENSMUST00000160894	ENSMUST00000160894_N2	ENSMUSG00000063063	Ctnna2	3.58104
ENSMUST00000160899	ENSMUST00000160899_N2	ENSMUSG00000045994	B3gat1	0.786355
ENSMUST00000161028	ENSMUST00000161028_N1	ENSMUSG00000037106	Fer1l6	1.9677	A3;SE
ENSMUST00000161028	ENSMUST00000161028_N3	ENSMUSG00000037106	Fer1l6	6.13786
ENSMUST00000161825	ENSMUST00000161825_N1	ENSMUSG00000021666	Gfm2	0
ENSMUST00000162097	ENSMUST00000162097_N2	ENSMUSG00000032503	Arpp21	0	SE
ENSMUST00000162097	ENSMUST00000162097_N9	ENSMUSG00000032503	Arpp21	0	RI
ENSMUST00000162158	ENSMUST00000162158_N2	ENSMUSG00000089773	Skint1	81.0436
ENSMUST00000162158	ENSMUST00000162158_N3	ENSMUSG00000089773	Skint1	9.10041	A5;RI
ENSMUST00000162158	ENSMUST00000162158_N5	ENSMUSG00000089773	Skint1	11.8072	A5;RI
ENSMUST00000162323	ENSMUST00000162323_N1	ENSMUSG00000022500	Litaf	3.42979	SE
ENSMUST00000162355	ENSMUST00000162355_N1	ENSMUSG00000041528	Rnf123	6.37742
ENSMUST00000162563	ENSMUST00000162563_N1	ENSMUSG00000004151	Etv1	11.0741	AF
ENSMUST00000162564	ENSMUST00000162564_N2	ENSMUSG00000107705	Gm45062	3.00446
ENSMUST00000162875	ENSMUST00000162875_N5	ENSMUSG00000026090	2010300C02Rik	0
ENSMUST00000163281	ENSMUST00000163281_N2	ENSMUSG00000049214	Skint7	14.4839	SE
ENSMUST00000163281	ENSMUST00000163281_N3	ENSMUSG00000049214	Skint7	0.659412	A5;SE
ENSMUST00000163281	ENSMUST00000163281_N4	ENSMUSG00000049214	Skint7	4.5398	RI;SE
ENSMUST00000163281	ENSMUST00000163281_N5	ENSMUSG00000049214	Skint7	8.1027	SE
ENSMUST00000163281	ENSMUST00000163281_N7	ENSMUSG00000049214	Skint7	42.2432	RI
ENSMUST00000163289	ENSMUST00000163289_N1	ENSMUSG00000033458	Fan1	1.04158	A5
ENSMUST00000163419	ENSMUST00000163419_N12	ENSMUSG00000022983	Scaf4	0	A5;RI
ENSMUST00000163439	ENSMUST00000163439_N1	ENSMUSG00000090314	2310050C09Rik	0.763965	SE
ENSMUST00000163475	ENSMUST00000163475_N4	ENSMUSG00000091474	2610021A01Rik	4.96434
ENSMUST00000163636	ENSMUST00000163636_N1	ENSMUSG00000090627	Gm8356	0.872191
ENSMUST00000163790	ENSMUST00000163790_N3	ENSMUSG00000079364	Gm3558	0	SE
ENSMUST00000163898	ENSMUST00000163898_N1	ENSMUSG00000036256	Igfbp7	3.01196	AF
ENSMUST00000163991	ENSMUST00000163991_N4	ENSMUSG00000071724	Smpd5	1.28933
ENSMUST00000164259	ENSMUST00000164259_N3	ENSMUSG00000040462	Os9	22.8899
ENSMUST00000164297	ENSMUST00000164297_N2	ENSMUSG00000057977	Skint11	2.32176
ENSMUST00000164661	ENSMUST00000164661_N1	ENSMUSG00000090693	Trim43a	8.8649	A3
ENSMUST00000164781	ENSMUST00000164781_N1	ENSMUSG00000024798	Htr7	14.3869
ENSMUST00000164781	ENSMUST00000164781_N2	ENSMUSG00000024798	Htr7	3.94032
ENSMUST00000164781	ENSMUST00000164781_N3	ENSMUSG00000024798	Htr7	19.2136	SE
ENSMUST00000164781	ENSMUST00000164781_N4	ENSMUSG00000024798	Htr7	20.6079
ENSMUST00000164834	ENSMUST00000164834_N1	ENSMUSG00000091735	Gpr62	4.89492
ENSMUST00000165046	ENSMUST00000165046_N1	ENSMUSG00000078599	Skint8	11.4495
ENSMUST00000165046	ENSMUST00000165046_N2	ENSMUSG00000078599	Skint8	11.2609	SE
ENSMUST00000165175	ENSMUST00000165175_N2	ENSMUSG00000053025	Sv2b	16.9203	A5
ENSMUST00000165230	ENSMUST00000165230_N1	ENSMUSG00000023882	Zfp54	2.66713
ENSMUST00000165230	ENSMUST00000165230_N2	ENSMUSG00000023882	Zfp54	3.68109	SE
ENSMUST00000165281	ENSMUST00000165281_N1	ENSMUSG00000028873	Cdca8	0.229829
ENSMUST00000166021	ENSMUST00000166021_N3	ENSMUSG00000028069	Gpatch4	11.3249
ENSMUST00000166193	ENSMUST00000166193_N1	ENSMUSG00000051985	Igfn1	1.30946	A3;RI
ENSMUST00000166193	ENSMUST00000166193_N3	ENSMUSG00000051985	Igfn1	1.44541	AF;RI;SE
ENSMUST00000166193	ENSMUST00000166193_N4	ENSMUSG00000051985	Igfn1	5.17664
ENSMUST00000166312	ENSMUST00000166312_N3	ENSMUSG00000020863	Luc7l3	4.25372	RI
ENSMUST00000166318	ENSMUST00000166318_N1	ENSMUSG00000038388	Mpp6	10.6038	AF
ENSMUST00000166694	ENSMUST00000166694_N1	ENSMUSG00000022586	Ly6i	82.8531
ENSMUST00000166729	ENSMUST00000166729_N1	ENSMUSG00000026828	Galnt5	2.89283	AF
ENSMUST00000167085	ENSMUST00000167085_N10	ENSMUSG00000038305	Spats2l	0
ENSMUST00000167085	ENSMUST00000167085_N5	ENSMUSG00000038305	Spats2l	4.4698
ENSMUST00000167116	ENSMUST00000167116_N1	ENSMUSG00000022159	Rab2b	1.69306
ENSMUST00000167252	ENSMUST00000167252_N4	ENSMUSG00000029771	Irf5	2.79965	A5;AF
ENSMUST00000167504	ENSMUST00000167504_N1	ENSMUSG00000091537	Tma7	1.48729
ENSMUST00000167505	ENSMUST00000167505_N1	ENSMUSG00000038457	Tmem255b	5.16692	SE
ENSMUST00000167529	ENSMUST00000167529_N1	ENSMUSG00000029811	Aoc1	40.1882	SE
ENSMUST00000167529	ENSMUST00000167529_N2	ENSMUSG00000029811	Aoc1	172.912
ENSMUST00000167598	ENSMUST00000167598_N1	ENSMUSG00000042306	S100a14	8.31129	A3;RI
ENSMUST00000167598	ENSMUST00000167598_N2	ENSMUSG00000042306	S100a14	31.7576	RI
ENSMUST00000167619	ENSMUST00000167619_N10	ENSMUSG00000034480	Diaph2	3.33028	SE
ENSMUST00000167619	ENSMUST00000167619_N6	ENSMUSG00000034480	Diaph2	2.88951	A5
ENSMUST00000167619	ENSMUST00000167619_N7	ENSMUSG00000034480	Diaph2	0.426699	SE
ENSMUST00000167786	ENSMUST00000167786_N1	ENSMUSG00000030470	Csrp3	1.90705
ENSMUST00000167797	ENSMUST00000167797_N5	ENSMUSG00000020359	Phykpl	5.56737
ENSMUST00000168156	ENSMUST00000168156_N2	ENSMUSG00000090527	Gm5538	0.771017	SE
ENSMUST00000168161	ENSMUST00000168161_N1	ENSMUSG00000090379	Gm8229	0	AF
ENSMUST00000168665	ENSMUST00000168665_N2	ENSMUSG00000032403	2300009A05Rik	5.92736
ENSMUST00000168680	ENSMUST00000168680_N1	ENSMUSG00000092009	Myh15	11.5716
ENSMUST00000168910	ENSMUST00000168910_N1	ENSMUSG00000029530	Ccr9	7.65444
ENSMUST00000169266	ENSMUST00000169266_N10	ENSMUSG00000005442	Cic	6.97891
ENSMUST00000169350	ENSMUST00000169350_N1	ENSMUSG00000029797	Sspo	20.1975	AF;RI
ENSMUST00000169350	ENSMUST00000169350_N3	ENSMUSG00000029797	Sspo	4.89605	A3;RI
ENSMUST00000169350	ENSMUST00000169350_N4	ENSMUSG00000029797	Sspo	7.66611	A3;RI
ENSMUST00000169350	ENSMUST00000169350_N6	ENSMUSG00000029797	Sspo	70.4424	RI
ENSMUST00000169350	ENSMUST00000169350_N7	ENSMUSG00000029797	Sspo	26.8956	A3;RI
ENSMUST00000169698	ENSMUST00000169698_N1	ENSMUSG00000042250	Pglyrp4	1.34089
ENSMUST00000169698	ENSMUST00000169698_N2	ENSMUSG00000042250	Pglyrp4	12.4192
ENSMUST00000169825	ENSMUST00000169825_N4	ENSMUSG00000055022	Cntn1	2.78715
ENSMUST00000170111	ENSMUST00000170111_N2	ENSMUSG00000021752	Kctd6	0	AF
ENSMUST00000170242	ENSMUST00000170242_N17	ENSMUSG00000004677	Myo9b	11.766	MX;SE
ENSMUST00000170397	ENSMUST00000170397_N1	ENSMUSG00000032327	Stra6	21.1038
ENSMUST00000170513	ENSMUST00000170513_N1	ENSMUSG00000004296	Il12b	9.10181	AF
ENSMUST00000170760	ENSMUST00000170760_N3	ENSMUSG00000091055	Siglec15	6.49941
ENSMUST00000170794	ENSMUST00000170794_N2	ENSMUSG00000024247	Pkdcc	227.216
ENSMUST00000170945	ENSMUST00000170945_N1	ENSMUSG00000070868	Skint3	14.355	AF;RI
ENSMUST00000170945	ENSMUST00000170945_N2	ENSMUSG00000070868	Skint3	1.92749
ENSMUST00000171139	ENSMUST00000171139_N1	ENSMUSG00000016283	H2-M2	109.031
ENSMUST00000171155	ENSMUST00000171155_N1	ENSMUSG00000055652	Klhl25	3.01019
ENSMUST00000171231	ENSMUST00000171231_N2	ENSMUSG00000037548	H2-DMb2	0	A5;SE
ENSMUST00000171529	ENSMUST00000171529_N1	ENSMUSG00000043461	Sptssb	0.40968
ENSMUST00000171751	ENSMUST00000171751_N3	ENSMUSG00000033565	Rbfox2	3.44951	A3;AL
ENSMUST00000171923	ENSMUST00000171923_N1	ENSMUSG00000040936	Ulk4	14.7016
ENSMUST00000171923	ENSMUST00000171923_N3	ENSMUSG00000040936	Ulk4	37.2715
ENSMUST00000171970	ENSMUST00000171970_N1	ENSMUSG00000039004	Bmp6	1.50874	AF
ENSMUST00000172191	ENSMUST00000172191_N1	ENSMUSG00000091650	Apol11a	0	SE
ENSMUST00000172191	ENSMUST00000172191_N3	ENSMUSG00000091650	Apol11a	9.31908	SE
ENSMUST00000172191	ENSMUST00000172191_N4	ENSMUSG00000091650	Apol11a	2.77821	RI;SE
ENSMUST00000172387	ENSMUST00000172387_N1	ENSMUSG00000022370	Mrpl13	1.24188
ENSMUST00000172387	ENSMUST00000172387_N4	ENSMUSG00000022370	Mrpl13	52.021	AF
ENSMUST00000172559	ENSMUST00000172559_N1	ENSMUSG00000096719	Mrgpra2b	1.15482
ENSMUST00000172939	ENSMUST00000172939_N5	ENSMUSG00000046782	Ttc6	0
ENSMUST00000172947	ENSMUST00000172947_N3	ENSMUSG00000030994	D7Ertd443e	3.5459	SE
ENSMUST00000172947	ENSMUST00000172947_N5	ENSMUSG00000030994	D7Ertd443e	1.86676
ENSMUST00000173019	ENSMUST00000173019_N1	ENSMUSG00000067288	Rps28	11.1908
ENSMUST00000173210	ENSMUST00000173210_N4	ENSMUSG00000001661	Hoxc6	3.66821	A3
ENSMUST00000173320	ENSMUST00000173320_N7	ENSMUSG00000045374	Wdr81	0	A5;RI
ENSMUST00000173320	ENSMUST00000173320_N8	ENSMUSG00000045374	Wdr81	0	RI
ENSMUST00000173324	ENSMUST00000173324_N4	ENSMUSG00000024397	Aif1	2.19399	A5;AF;SE
ENSMUST00000173680	ENSMUST00000173680_N1	ENSMUSG00000092609	Gm20481	0
ENSMUST00000173680	ENSMUST00000173680_N3	ENSMUSG00000092609	Gm20481	12.0862	AF
ENSMUST00000174651	ENSMUST00000174651_N3	ENSMUSG00000041716	Gm20604	1.96605
ENSMUST00000174699	ENSMUST00000174699_N4	ENSMUSG00000073409	H2-Q6	10.1007	SE
ENSMUST00000175934	ENSMUST00000175934_N2	ENSMUSG00000024613	Tcof1	41.9732
ENSMUST00000175934	ENSMUST00000175934_N4	ENSMUSG00000024613	Tcof1	17.7988	SE
ENSMUST00000176018	ENSMUST00000176018_N8	ENSMUSG00000027035	Cers6	0	A5;RI
ENSMUST00000176030	ENSMUST00000176030_N2	ENSMUSG00000024921	Smarca2	0.446901	A5;AF
ENSMUST00000176328	ENSMUST00000176328_N1	ENSMUSG00000091572	Vmn2r3	2.20378
ENSMUST00000176479	ENSMUST00000176479_N5	ENSMUSG00000037816	Fbxw17	0.345065	RI;SE
ENSMUST00000176540	ENSMUST00000176540_N7	ENSMUSG00000052534	Pbx1	6.88692	SE
ENSMUST00000177551	ENSMUST00000177551_N1	ENSMUSG00000049871	Nlrc3	0.484939	RI;SE
ENSMUST00000177587	ENSMUST00000177587_N1	ENSMUSG00000034271	Jdp2	0.344777	AF
ENSMUST00000177678	ENSMUST00000177678_N1	ENSMUSG00000096393	Fam240a	12.8719
ENSMUST00000177817	ENSMUST00000177817_N2	ENSMUSG00000095280	Gm21738	0
ENSMUST00000177908	ENSMUST00000177908_N1	ENSMUSG00000094282	Cfap73	0	RI
ENSMUST00000177934	ENSMUST00000177934_N1	ENSMUSG00000094186	Gm1553	4.68575
ENSMUST00000178065	ENSMUST00000178065_N1	ENSMUSG00000094893	Gm4791	2.18632
ENSMUST00000178065	ENSMUST00000178065_N2	ENSMUSG00000094893	Gm4791	1.24366
ENSMUST00000178555	ENSMUST00000178555_N2	ENSMUSG00000029673	Auts2	0	A3;A5
ENSMUST00000178630	ENSMUST00000178630_N1	ENSMUSG00000094219	Calhm3	3.39182	AF
ENSMUST00000178668	ENSMUST00000178668_N1	ENSMUSG00000037610	Kcnmb2	3.86847
ENSMUST00000178728	ENSMUST00000178728_N1	ENSMUSG00000095195	Gm3005	12.2794
ENSMUST00000178765	ENSMUST00000178765_N1	ENSMUSG00000096271	Ccl21c	1.98288
ENSMUST00000178767	ENSMUST00000178767_N1	ENSMUSG00000096257	Ccer2	2.40904	AF
ENSMUST00000179253	ENSMUST00000179253_N1	ENSMUSG00000095456	Il11ra2	55.4705
ENSMUST00000179346	ENSMUST00000179346_N3	ENSMUSG00000095993	Gm21060	0	SE
ENSMUST00000179346	ENSMUST00000179346_N4	ENSMUSG00000095993	Gm21060	2.21105	SE
ENSMUST00000179468	ENSMUST00000179468_N1	ENSMUSG00000095799	Gm8332	3.53582
ENSMUST00000179693	ENSMUST00000179693_N1	ENSMUSG00000070495	Ctcfl	15.8636	A3
ENSMUST00000179693	ENSMUST00000179693_N2	ENSMUSG00000070495	Ctcfl	1.41278	A3;A5
ENSMUST00000179693	ENSMUST00000179693_N3	ENSMUSG00000070495	Ctcfl	2.75055	A3;RI;SE
ENSMUST00000179751	ENSMUST00000179751_N1	ENSMUSG00000095654	Plscr5	3.41378	AL
ENSMUST00000179751	ENSMUST00000179751_N2	ENSMUSG00000095654	Plscr5	0.81459
ENSMUST00000179751	ENSMUST00000179751_N3	ENSMUSG00000095654	Plscr5	0.550654
ENSMUST00000179758	ENSMUST00000179758_N6	ENSMUSG00000058022	Adtrp	1.68534
ENSMUST00000179852	ENSMUST00000179852_N3	ENSMUSG00000021368	Tbc1d7	0
ENSMUST00000179929	ENSMUST00000179929_N2	ENSMUSG00000019888	Mgat4c	2.42641	SE
ENSMUST00000179956	ENSMUST00000179956_N10	ENSMUSG00000050994	Adgb	2.04705	A5;AF
ENSMUST00000179956	ENSMUST00000179956_N12	ENSMUSG00000050994	Adgb	0.272894	A5;AF
ENSMUST00000179956	ENSMUST00000179956_N2	ENSMUSG00000050994	Adgb	2.78684	A3;AF
ENSMUST00000179956	ENSMUST00000179956_N3	ENSMUSG00000050994	Adgb	0
ENSMUST00000179956	ENSMUST00000179956_N5	ENSMUSG00000050994	Adgb	0.602278	A5;RI
ENSMUST00000179956	ENSMUST00000179956_N9	ENSMUSG00000050994	Adgb	1.72856
ENSMUST00000180063	ENSMUST00000180063_N2	ENSMUSG00000045326	Fndc7	10.6405	SE
ENSMUST00000180417	ENSMUST00000180417_N1	ENSMUSG00000031819	Emc8	20.5924
ENSMUST00000180697	ENSMUST00000180697_N1	ENSMUSG00000097327	E030030I06Rik	10.4084	AF
ENSMUST00000180716	ENSMUST00000180716_N7	ENSMUSG00000033075	Senp1	0	A3;AF
ENSMUST00000180792	ENSMUST00000180792_N14	ENSMUSG00000071669	Snx29	6.38342	AF;AL
ENSMUST00000180792	ENSMUST00000180792_N7	ENSMUSG00000071669	Snx29	0.47482
ENSMUST00000181956	ENSMUST00000181956_N1	ENSMUSG00000097481	D330020A13Rik	1.52403
ENSMUST00000182660	ENSMUST00000182660_N12	ENSMUSG00000040225	Prrc2c	2.34674
ENSMUST00000182660	ENSMUST00000182660_N2	ENSMUSG00000040225	Prrc2c	1.36e-06	SE
ENSMUST00000182660	ENSMUST00000182660_N9	ENSMUSG00000040225	Prrc2c	2.51894
ENSMUST00000182750	ENSMUST00000182750_N1	ENSMUSG00000070564	Ntn5	3.44458
ENSMUST00000182750	ENSMUST00000182750_N5	ENSMUSG00000070564	Ntn5	9.62095	A5
ENSMUST00000182816	ENSMUST00000182816_N2	ENSMUSG00000030666	Calcb	223.313	A3;RI
ENSMUST00000182816	ENSMUST00000182816_N3	ENSMUSG00000030666	Calcb	60.0326	RI
ENSMUST00000182816	ENSMUST00000182816_N4	ENSMUSG00000030666	Calcb	51.5899	RI
ENSMUST00000182816	ENSMUST00000182816_N5	ENSMUSG00000030666	Calcb	3.14207	A5
ENSMUST00000183034	ENSMUST00000183034_N11	ENSMUSG00000026131	Dst	4.54031
ENSMUST00000183659	ENSMUST00000183659_N5	ENSMUSG00000052512	Nav2	1.85165
ENSMUST00000184063	ENSMUST00000184063_N1	ENSMUSG00000028804	Csmd2	0
ENSMUST00000184063	ENSMUST00000184063_N2	ENSMUSG00000028804	Csmd2	3.78355
ENSMUST00000184189	ENSMUST00000184189_N2	ENSMUSG00000098509	Rgs21	0.994434	SE
ENSMUST00000184189	ENSMUST00000184189_N3	ENSMUSG00000098509	Rgs21	0
ENSMUST00000184189	ENSMUST00000184189_N4	ENSMUSG00000098509	Rgs21	0.920989	SE
ENSMUST00000184766	ENSMUST00000184766_N4	ENSMUSG00000021023	1110008L16Rik	44.9826	AF
ENSMUST00000184863	ENSMUST00000184863_N2	ENSMUSG00000038055	Dexi	8.77126	A5
ENSMUST00000185633	ENSMUST00000185633_N4	ENSMUSG00000032410	Xrn1	2.50656
ENSMUST00000185944	ENSMUST00000185944_N2	ENSMUSG00000033029	1700088E04Rik	5.18924	A3;AF;AL;RI
ENSMUST00000185944	ENSMUST00000185944_N3	ENSMUSG00000033029	1700088E04Rik	3.00527	A3;A5;AF;RI
ENSMUST00000186239	ENSMUST00000186239_N8	ENSMUSG00000019813	Cep57l1	4.73973	AF
ENSMUST00000186583	ENSMUST00000186583_N1	ENSMUSG00000028053	Ash1l	4.23358
ENSMUST00000186733	ENSMUST00000186733_N5	ENSMUSG00000048874	Phf3	8.50874	MX;SE
ENSMUST00000186863	ENSMUST00000186863_N5	ENSMUSG00000079427	Mthfsl	0.683205	SE
ENSMUST00000186969	ENSMUST00000186969_N1	ENSMUSG00000034359	Skint2	35.2954	A3
ENSMUST00000186969	ENSMUST00000186969_N3	ENSMUSG00000034359	Skint2	1.28102	A3;MX
ENSMUST00000186969	ENSMUST00000186969_N4	ENSMUSG00000034359	Skint2	0.848232	A3;SE
ENSMUST00000186969	ENSMUST00000186969_N5	ENSMUSG00000034359	Skint2	17.9516	SE
ENSMUST00000186969	ENSMUST00000186969_N6	ENSMUSG00000034359	Skint2	263.306	SE
ENSMUST00000187183	ENSMUST00000187183_N1	ENSMUSG00000095620	2010005H15Rik	1.64942	SE
ENSMUST00000187313	ENSMUST00000187313_N2	ENSMUSG00000005763	Cd247	3.16695	AL
ENSMUST00000187313	ENSMUST00000187313_N6	ENSMUSG00000005763	Cd247	0.154042
ENSMUST00000187738	ENSMUST00000187738_N1	ENSMUSG00000100704	Gm28434	1.14052
ENSMUST00000188310	ENSMUST00000188310_N1	ENSMUSG00000026246	Alppl2	13.8347
ENSMUST00000188677	ENSMUST00000188677_N2	ENSMUSG00000026158	Ogfrl1	4.57793	A5
ENSMUST00000188804	ENSMUST00000188804_N15	ENSMUSG00000090272	Mndal	0.23344	AF
ENSMUST00000188804	ENSMUST00000188804_N16	ENSMUSG00000090272	Mndal	8.83119
ENSMUST00000188804	ENSMUST00000188804_N9	ENSMUSG00000090272	Mndal	0
ENSMUST00000189248	ENSMUST00000189248_N3	ENSMUSG00000062760	1810041L15Rik	0
ENSMUST00000189542	ENSMUST00000189542_N2	ENSMUSG00000026107	Nabp1	5.63909	SE
ENSMUST00000189542	ENSMUST00000189542_N5	ENSMUSG00000026107	Nabp1	0.854087
ENSMUST00000189542	ENSMUST00000189542_N6	ENSMUSG00000026107	Nabp1	6.16538	RI;SE
ENSMUST00000189542	ENSMUST00000189542_N7	ENSMUSG00000026107	Nabp1	2.58665	RI;SE
ENSMUST00000190116	ENSMUST00000190116_N2	ENSMUSG00000026279	Thap4	2.69876	AF
ENSMUST00000190116	ENSMUST00000190116_N3	ENSMUSG00000026279	Thap4	8.89208	A5;AF
ENSMUST00000190116	ENSMUST00000190116_N4	ENSMUSG00000026279	Thap4	12.1789	AF
ENSMUST00000190116	ENSMUST00000190116_N5	ENSMUSG00000026279	Thap4	5.50581
ENSMUST00000190193	ENSMUST00000190193_N1	ENSMUSG00000091345	Col6a5	2.76303
ENSMUST00000190262	ENSMUST00000190262_N1	ENSMUSG00000022582	Ly6g	30.8135	A3
ENSMUST00000190514	ENSMUST00000190514_N1	ENSMUSG00000032258	Lca5	0.566015
ENSMUST00000190686	ENSMUST00000190686_N3	ENSMUSG00000039218	Srrm2	5.71951
ENSMUST00000190876	ENSMUST00000190876_N3	ENSMUSG00000025958	Creb1	15.3768
ENSMUST00000191550	ENSMUST00000191550_N2	ENSMUSG00000014850	Msh3	0
ENSMUST00000191681	ENSMUST00000191681_N1	ENSMUSG00000040329	Il7	1.16759	AF
ENSMUST00000191681	ENSMUST00000191681_N2	ENSMUSG00000040329	Il7	11.2088	AF
ENSMUST00000191681	ENSMUST00000191681_N4	ENSMUSG00000040329	Il7	4.85282	A5
ENSMUST00000191826	ENSMUST00000191826_N2	ENSMUSG00000027536	Chmp4c	2.54528
ENSMUST00000193426	ENSMUST00000193426_N1	ENSMUSG00000019817	Plagl1	2.80419
ENSMUST00000193603	ENSMUST00000193603_N2	ENSMUSG00000063887	Nlgn1	6.71679
ENSMUST00000194094	ENSMUST00000194094_N2	ENSMUSG00000072494	Ppp1r3e	0
ENSMUST00000194797	ENSMUST00000194797_N2	ENSMUSG00000004709	Cd244	6.09196
ENSMUST00000194797	ENSMUST00000194797_N3	ENSMUSG00000004709	Cd244	3.25384	A3
ENSMUST00000195008	ENSMUST00000195008_N2	ENSMUSG00000039286	Fndc3b	6.50935	A5
ENSMUST00000195684	ENSMUST00000195684_N4	ENSMUSG00000026070	Il18r1	12.4575	A5;SE
ENSMUST00000195708	ENSMUST00000195708_N8	ENSMUSG00000062232	Rapgef2	3.73783
ENSMUST00000195847	ENSMUST00000195847_N1	ENSMUSG00000096879	Gm4858	7.59356
ENSMUST00000195860	ENSMUST00000195860_N7	ENSMUSG00000026074	Map4k4	15.0603
ENSMUST00000195943	ENSMUST00000195943_N2	ENSMUSG00000028949	Smarcd3	1.28436
ENSMUST00000196296	ENSMUST00000196296_N1	ENSMUSG00000038276	Asic3	8.36082	A3
ENSMUST00000196296	ENSMUST00000196296_N2	ENSMUSG00000038276	Asic3	0.390082
ENSMUST00000196339	ENSMUST00000196339_N4	ENSMUSG00000057816	1700007G11Rik	1.13095	AF
ENSMUST00000196398	ENSMUST00000196398_N4	ENSMUSG00000040943	Tet2	3.48316
ENSMUST00000196454	ENSMUST00000196454_N2	ENSMUSG00000039747	Orai2	2.63675
ENSMUST00000196997	ENSMUST00000196997_N1	ENSMUSG00000029580	Actb	78.9946
ENSMUST00000197502	ENSMUST00000197502_N9	ENSMUSG00000027751	Supt20	0
ENSMUST00000198017	ENSMUST00000198017_N1	ENSMUSG00000029581	Fscn1	30.8518
ENSMUST00000199597	ENSMUST00000199597_N1	ENSMUSG00000057123	Gja5	0.62901
ENSMUST00000199659	ENSMUST00000199659_N10	ENSMUSG00000056476	Med12l	1.60671
ENSMUST00000199659	ENSMUST00000199659_N11	ENSMUSG00000056476	Med12l	4.23921	A5
ENSMUST00000201734	ENSMUST00000201734_N3	ENSMUSG00000043747	1520401A03Rik	6.8411
ENSMUST00000201734	ENSMUST00000201734_N4	ENSMUSG00000043747	1520401A03Rik	7.19904	SE
ENSMUST00000202220	ENSMUST00000202220_N3	ENSMUSG00000029134	Plb1	5.68188	A5
ENSMUST00000202639	ENSMUST00000202639_N7	ENSMUSG00000106864	Gtf3c2	2.60027	A5;AF
ENSMUST00000202905	ENSMUST00000202905_N9	ENSMUSG00000042331	Specc1	3.2801	AF
ENSMUST00000202932	ENSMUST00000202932_N1	ENSMUSG00000053134	Supt7l	1.66421
ENSMUST00000203372	ENSMUST00000203372_N1	ENSMUSG00000004347	Pde1c	1.47229
ENSMUST00000204105	ENSMUST00000204105_N2	ENSMUSG00000043541	Casc1	1.94756
ENSMUST00000204121	ENSMUST00000204121_N1	ENSMUSG00000107789	Gm44965	4.87256
ENSMUST00000204482	ENSMUST00000204482_N1	ENSMUSG00000023367	Tmem176a	40.4615	A3
ENSMUST00000204521	ENSMUST00000204521_N1	ENSMUSG00000107588	Gm45021	13.3557	AF;AL
ENSMUST00000204521	ENSMUST00000204521_N2	ENSMUSG00000107588	Gm45021	2.21957	A3;AL
ENSMUST00000204521	ENSMUST00000204521_N3	ENSMUSG00000107588	Gm45021	0	AL
ENSMUST00000204659	ENSMUST00000204659_N4	ENSMUSG00000005364	Il5ra	3.10348	SE
ENSMUST00000204659	ENSMUST00000204659_N5	ENSMUSG00000005364	Il5ra	6.81848	SE
ENSMUST00000204659	ENSMUST00000204659_N7	ENSMUSG00000005364	Il5ra	5.77254	AF
ENSMUST00000204659	ENSMUST00000204659_N8	ENSMUSG00000005364	Il5ra	0.926843	AF
ENSMUST00000204836	ENSMUST00000204836_N1	ENSMUSG00000001520	Nrip2	1.52486
ENSMUST00000205081	ENSMUST00000205081_N3	ENSMUSG00000067541	A630073D07Rik	0.901622	AL
ENSMUST00000205324	ENSMUST00000205324_N2	ENSMUSG00000058966	Fam57b	18.801
ENSMUST00000205437	ENSMUST00000205437_N1	ENSMUSG00000097075	D830044I16Rik	0.256566	A5
ENSMUST00000205437	ENSMUST00000205437_N6	ENSMUSG00000097075	D830044I16Rik	4.98819
ENSMUST00000205686	ENSMUST00000205686_N6	ENSMUSG00000034063	4930590J08Rik	2.78875
ENSMUST00000205815	ENSMUST00000205815_N2	ENSMUSG00000060860	Ube2s	18.8942	SE
ENSMUST00000206846	ENSMUST00000206846_N2	ENSMUSG00000030748	Il4ra	23.1831	SE
ENSMUST00000207301	ENSMUST00000207301_N3	ENSMUSG00000037492	Zmat4	0.665365
ENSMUST00000207470	ENSMUST00000207470_N2	ENSMUSG00000062991	Nrg1	6.60541
ENSMUST00000207883	ENSMUST00000207883_N1	ENSMUSG00000055407	Map6	0.369044	SE
ENSMUST00000208001	ENSMUST00000208001_N3	ENSMUSG00000047369	Dnah14	3.49742
ENSMUST00000208003	ENSMUST00000208003_N1	ENSMUSG00000091601	Olfr93	1.10789
ENSMUST00000208128	ENSMUST00000208128_N3	ENSMUSG00000003190	Bcl2l12	3.25625
ENSMUST00000208311	ENSMUST00000208311_N11	ENSMUSG00000047517	Dmbt1	1.25268
ENSMUST00000208311	ENSMUST00000208311_N13	ENSMUSG00000047517	Dmbt1	0	MX
ENSMUST00000208660	ENSMUST00000208660_N4	ENSMUSG00000025900	Rp1	3.82441
ENSMUST00000208955	ENSMUST00000208955_N1	ENSMUSG00000109446	Gm9195	1.97183	A3;A5;AL;RI;SE
ENSMUST00000208955	ENSMUST00000208955_N10	ENSMUSG00000109446	Gm9195	0.77594	A3;A5;RI;SE
ENSMUST00000208955	ENSMUST00000208955_N11	ENSMUSG00000109446	Gm9195	1.57594	A3;RI
ENSMUST00000208955	ENSMUST00000208955_N12	ENSMUSG00000109446	Gm9195	0.0714789	A3;A5;RI
ENSMUST00000208955	ENSMUST00000208955_N13	ENSMUSG00000109446	Gm9195	1.27584	A3;A5;RI
ENSMUST00000208955	ENSMUST00000208955_N14	ENSMUSG00000109446	Gm9195	1.29767	A3;A5;RI;SE
ENSMUST00000208955	ENSMUST00000208955_N2	ENSMUSG00000109446	Gm9195	2.33442	SE
ENSMUST00000208955	ENSMUST00000208955_N3	ENSMUSG00000109446	Gm9195	3.26e-05	RI;SE
ENSMUST00000208955	ENSMUST00000208955_N6	ENSMUSG00000109446	Gm9195	4.08e-05	A3;A5;RI
ENSMUST00000208955	ENSMUST00000208955_N7	ENSMUSG00000109446	Gm9195	4.35e-05	A3;A5;RI;SE
ENSMUST00000208955	ENSMUST00000208955_N8	ENSMUSG00000109446	Gm9195	0.840906	A3;RI
ENSMUST00000208955	ENSMUST00000208955_N9	ENSMUSG00000109446	Gm9195	1.42291	A3;A5;RI;SE
ENSMUST00000209421	ENSMUST00000209421_N1	ENSMUSG00000052819	Best2	3.11036	A5
ENSMUST00000209467	ENSMUST00000209467_N9	ENSMUSG00000089989	Gm45713	24.5603
ENSMUST00000209474	ENSMUST00000209474_N4	ENSMUSG00000056608	Chd9	67.2428
ENSMUST00000209532	ENSMUST00000209532_N8	ENSMUSG00000036712	Cyld	12.964	AF
ENSMUST00000209628	ENSMUST00000209628_N2	ENSMUSG00000049411	Tmem241	2.56543
ENSMUST00000209909	ENSMUST00000209909_N2	ENSMUSG00000031450	Grk1	4.13817	AF
ENSMUST00000210032	ENSMUST00000210032_N1	ENSMUSG00000049556	Lingo1	5.64288	SE
ENSMUST00000210135	ENSMUST00000210135_N8	ENSMUSG00000040640	Erc2	2.49767
ENSMUST00000210150	ENSMUST00000210150_N1	ENSMUSG00000008461	Fut1	2.95404	RI
ENSMUST00000210150	ENSMUST00000210150_N2	ENSMUSG00000008461	Fut1	11.5816
ENSMUST00000210433	ENSMUST00000210433_N1	ENSMUSG00000110266	Gm32742	1.6767	A5;AL;RI;SE
ENSMUST00000210478	ENSMUST00000210478_N13	ENSMUSG00000056228	Cars2	1.54128	A3
ENSMUST00000210772	ENSMUST00000210772_N1	ENSMUSG00000071637	Cebpd	2.35594
ENSMUST00000211023	ENSMUST00000211023_N1	ENSMUSG00000110100	Gm45261	1.0513	AF
ENSMUST00000211179	ENSMUST00000211179_N5	ENSMUSG00000025486	Sirt3	6.7885	A5
ENSMUST00000211245	ENSMUST00000211245_N1	ENSMUSG00000085484	Gm13539	0	RI
ENSMUST00000211245	ENSMUST00000211245_N2	ENSMUSG00000085484	Gm13539	12.6553
ENSMUST00000211245	ENSMUST00000211245_N3	ENSMUSG00000085484	Gm13539	1.06096
ENSMUST00000211638	ENSMUST00000211638_N1	ENSMUSG00000025474	Tubgcp2	2.1957
ENSMUST00000211738	ENSMUST00000211738_N4	ENSMUSG00000109903	Gm28710	0	SE
ENSMUST00000211738	ENSMUST00000211738_N5	ENSMUSG00000109903	Gm28710	7.20912	SE
ENSMUST00000211738	ENSMUST00000211738_N6	ENSMUSG00000109903	Gm28710	4.49687
ENSMUST00000211896	ENSMUST00000211896_N3	ENSMUSG00000111375	A830010M20Rik	3.33663
ENSMUST00000211991	ENSMUST00000211991_N2	ENSMUSG00000031902	Nfatc3	1.03765
ENSMUST00000212114	ENSMUST00000212114_N1	ENSMUSG00000110628	Gm37797	5.83749
ENSMUST00000212287	ENSMUST00000212287_N2	ENSMUSG00000040838	Gm11639	24.6064
ENSMUST00000212376	ENSMUST00000212376_N21	ENSMUSG00000025558	Dock9	0
ENSMUST00000212376	ENSMUST00000212376_N24	ENSMUSG00000025558	Dock9	36.9565
ENSMUST00000212376	ENSMUST00000212376_N7	ENSMUSG00000025558	Dock9	9.75215
ENSMUST00000212520	ENSMUST00000212520_N13	ENSMUSG00000037326	Capn15	1.18713	RI
ENSMUST00000212549	ENSMUST00000212549_N2	ENSMUSG00000079038	D130040H23Rik	16.6777
ENSMUST00000213348	ENSMUST00000213348_N1	ENSMUSG00000080713	Olfr1174-ps	1.77184
ENSMUST00000213641	ENSMUST00000213641_N1	ENSMUSG00000095941	Gm21964	1.33835
ENSMUST00000213897	ENSMUST00000213897_N1	ENSMUSG00000039697	Ncoa7	28.3723
ENSMUST00000214340	ENSMUST00000214340_N1	ENSMUSG00000044534	Ackr2	2.13459
ENSMUST00000214357	ENSMUST00000214357_N2	ENSMUSG00000034275	Igsf9b	1.23583	A5;SE
ENSMUST00000214357	ENSMUST00000214357_N8	ENSMUSG00000034275	Igsf9b	2.83323	SE
ENSMUST00000214522	ENSMUST00000214522_N2	ENSMUSG00000033392	Clasp2	0
ENSMUST00000215038	ENSMUST00000215038_N1	ENSMUSG00000079559	Colca2	22.4881
ENSMUST00000215372	ENSMUST00000215372_N11	ENSMUSG00000057551	Zfp317	0	SE
ENSMUST00000215396	ENSMUST00000215396_N7	ENSMUSG00000032312	Csk	1.92022	A3
ENSMUST00000215694	ENSMUST00000215694_N3	ENSMUSG00000045620	Odf3l1	1.15733
ENSMUST00000215780	ENSMUST00000215780_N14	ENSMUSG00000044229	Nxpe4	0	AF
ENSMUST00000215959	ENSMUST00000215959_N3	ENSMUSG00000047898	Ccr4	11.3854	SE
ENSMUST00000217336	ENSMUST00000217336_N14	ENSMUSG00000032198	Dock6	2.92727	A3;RI;SE
ENSMUST00000217590	ENSMUST00000217590_N1	ENSMUSG00000091531	Olfr102	3.7293
ENSMUST00000217854	ENSMUST00000217854_N5	ENSMUSG00000053825	Ppfia2	0	A3
ENSMUST00000220297	ENSMUST00000220297_N2	ENSMUSG00000004931	Apba3	5.9215
ENSMUST00000220299	ENSMUST00000220299_N13	ENSMUSG00000010461	Eya4	8.37979
ENSMUST00000220299	ENSMUST00000220299_N3	ENSMUSG00000010461	Eya4	3.506
ENSMUST00000220499	ENSMUST00000220499_N1	ENSMUSG00000113805	Gm5788	1.62537
ENSMUST00000220863	ENSMUST00000220863_N1	ENSMUSG00000021458	2010111I01Rik	3.96347
ENSMUST00000221740	ENSMUST00000221740_N1	ENSMUSG00000047636	Cdcp2	1.39132	A5
ENSMUST00000221740	ENSMUST00000221740_N2	ENSMUSG00000047636	Cdcp2	4.42425	A5
ENSMUST00000221740	ENSMUST00000221740_N3	ENSMUSG00000047636	Cdcp2	1.12897
ENSMUST00000222190	ENSMUST00000222190_N1	ENSMUSG00000043827	Olfr94	2.70098	SE
ENSMUST00000222695	ENSMUST00000222695_N7	ENSMUSG00000021044	Adck1	14.5496
ENSMUST00000222857	ENSMUST00000222857_N2	ENSMUSG00000000078	Klf6	4.03394	A3
ENSMUST00000222911	ENSMUST00000222911_N2	ENSMUSG00000040441	Slc26a10	4.21759
ENSMUST00000222976	ENSMUST00000222976_N1	ENSMUSG00000063130	Calml3	1.56468
ENSMUST00000223282	ENSMUST00000223282_N11	ENSMUSG00000051166	Eml5	0
ENSMUST00000223285	ENSMUST00000223285_N1	ENSMUSG00000021207	Akr1c21	2.29432
ENSMUST00000223285	ENSMUST00000223285_N3	ENSMUSG00000021207	Akr1c21	5.95303
ENSMUST00000223285	ENSMUST00000223285_N4	ENSMUSG00000021207	Akr1c21	1.61327	A5
ENSMUST00000223787	ENSMUST00000223787_N6	ENSMUSG00000025189	Cnnm1	9.46969
ENSMUST00000224011	ENSMUST00000224011_N3	ENSMUSG00000021720	Rnf180	41.2517
ENSMUST00000224023	ENSMUST00000224023_N1	ENSMUSG00000021743	Fezf2	4.91504	A5
ENSMUST00000224023	ENSMUST00000224023_N2	ENSMUSG00000021743	Fezf2	25.4406	A3
ENSMUST00000224023	ENSMUST00000224023_N3	ENSMUSG00000021743	Fezf2	22.7912	RI
ENSMUST00000224047	ENSMUST00000224047_N3	ENSMUSG00000024561	Mbd1	0	A3;RI
ENSMUST00000224858	ENSMUST00000224858_N7	ENSMUSG00000042348	Arl15	0.53939	A5;AF
ENSMUST00000225120	ENSMUST00000225120_N1	ENSMUSG00000048281	Dleu7	5.61726
ENSMUST00000225120	ENSMUST00000225120_N2	ENSMUSG00000048281	Dleu7	3.2002	A5
ENSMUST00000225596	ENSMUST00000225596_N1	ENSMUSG00000023387	Kcnk16	2.48583
ENSMUST00000225949	ENSMUST00000225949_N5	ENSMUSG00000021895	Arhgef3	10.7573
ENSMUST00000225949	ENSMUST00000225949_N6	ENSMUSG00000021895	Arhgef3	3.7606	SE
ENSMUST00000226455	ENSMUST00000226455_N1	ENSMUSG00000036641	Ccdc148	1.54249	A5
ENSMUST00000226455	ENSMUST00000226455_N2	ENSMUSG00000036641	Ccdc148	1.78426
ENSMUST00000226626	ENSMUST00000226626_N1	ENSMUSG00000038760	Trhr	1.86026	AL
ENSMUST00000226655	ENSMUST00000226655_N3	ENSMUSG00000022996	Wnt10b	10.3058	A5;AF
ENSMUST00000226655	ENSMUST00000226655_N4	ENSMUSG00000022996	Wnt10b	8.35309	A5
ENSMUST00000226727	ENSMUST00000226727_N1	ENSMUSG00000033470	Cysltr2	2.11666	AF;RI
ENSMUST00000226872	ENSMUST00000226872_N7	ENSMUSG00000022556	Hsf1	0
ENSMUST00000227120	ENSMUST00000227120_N1	ENSMUSG00000040097	Flywch1	3.57736
ENSMUST00000227173	ENSMUST00000227173_N10	ENSMUSG00000059586	Nsmce2	1.68159	A5;AF
ENSMUST00000227173	ENSMUST00000227173_N11	ENSMUSG00000059586	Nsmce2	2.10437	A5;AF
ENSMUST00000227173	ENSMUST00000227173_N7	ENSMUSG00000059586	Nsmce2	9.93625
ENSMUST00000227200	ENSMUST00000227200_N2	ENSMUSG00000048038	Ccdc187	1.96078	A3;RI

## Sheet: Supp. Table 4
geneset_id	description	n_genes_foreground	n_genes_background	n_genes_set	p.val	p.adj	odds.ratio	genes	entrez_ids
GO:0042270	protection from natural killer cell mediated cytotoxicity	4	7	8	0.000347254	0.0202158	21.6162	H2-M3,H2-T23,Serpinb9,Clec2d	14991,15040,20723,93694
GO:0032817	regulation of natural killer cell proliferation	4	9	9	0.00113751	0.0401671	12.9799	H2-T23,Il12b,Cd244a,Ptpn22	15040,16160,18106,19260
GO:0042996	regulation of Golgi to plasma membrane protein transport	4	9	11	0.00113751	0.0401671	12.9799	Csk,Acsl3,Pkdcc,Cnst	12988,74205,106522,226744
GO:2001187	positive regulation of CD8-positive, alpha-beta T cell activation	4	9	9	0.00113751	0.0401671	12.9799	Runx1,H2-T23,Cd244a,Ptpn22	12394,15040,18106,19260
GO:0002486	antigen processing and presentation of endogenous peptide antigen via MHC class I via ER pathway, TAP-independent	10	28	32	2.15391e-06	0.000839078	9.05453	H2-K1,H2-M10.1,H2-M2,H2-M3,H2-Q7,H2-T23,H2-Q6,H2-Q9,H2-M1,H2-M10.5	14972,14985,14990,14991,15018,15040,110557,110558,224756,224761
GO:0002476	antigen processing and presentation of endogenous peptide antigen via MHC class Ib	10	29	39	3.11635e-06	0.000839078	8.5779	H2-K1,H2-M10.1,H2-M2,H2-M3,H2-Q7,H2-T23,H2-Q6,H2-Q9,H2-M1,H2-M10.5	14972,14985,14990,14991,15018,15040,110557,110558,224756,224761
GO:0002484	antigen processing and presentation of endogenous peptide antigen via MHC class I via ER pathway	10	29	35	3.11635e-06	0.000839078	8.5779	H2-K1,H2-M10.1,H2-M2,H2-M3,H2-Q7,H2-T23,H2-Q6,H2-Q9,H2-M1,H2-M10.5	14972,14985,14990,14991,15018,15040,110557,110558,224756,224761
GO:0002428	antigen processing and presentation of peptide antigen via MHC class Ib	10	30	41	4.43123e-06	0.000954838	8.1457	H2-K1,H2-M10.1,H2-M2,H2-M3,H2-Q7,H2-T23,H2-Q6,H2-Q9,H2-M1,H2-M10.5	14972,14985,14990,14991,15018,15040,110557,110558,224756,224761
GO:0002475	antigen processing and presentation via MHC class Ib	10	33	47	1.16308e-05	0.00178949	7.08348	H2-K1,H2-M10.1,H2-M2,H2-M3,H2-Q7,H2-T23,H2-Q6,H2-Q9,H2-M1,H2-M10.5	14972,14985,14990,14991,15018,15040,110557,110558,224756,224761
GO:0001916	positive regulation of T cell mediated cytotoxicity	13	44	59	7.88533e-07	0.000566166	6.84768	H2-K1,H2-M10.1,H2-M2,H2-M3,H2-Q7,H2-T23,Hspa8,Il12a,Il12b,H2-Q6,H2-Q9,H2-M1,H2-M10.5	14972,14985,14990,14991,15018,15040,15481,16159,16160,110557,110558,224756,224761
GO:0002478	antigen processing and presentation of exogenous peptide antigen	7	24	28	0.000320973	0.0192049	6.69321	H2-Aa,H2-Ab1,H2-Eb1,H2-K1,H2-M3,H2-DMb2,H2-T23	14960,14961,14969,14972,14991,15000,15040
GO:1903204	negative regulation of oxidative stress-induced neuron death	7	24	31	0.000320973	0.0192049	6.69321	Atf4,Il10,Rest,Tsc1,Meak7,Oxr1,Ncoa7	11911,16153,19712,64930,74347,170719,211329
GO:0001914	regulation of T cell mediated cytotoxicity	14	49	65	4.70483e-07	0.00050671	6.53624	H2-K1,H2-M10.1,H2-M2,H2-M3,H2-Q7,H2-T23,Hspa8,Il12a,Il12b,Il7r,H2-Q6,H2-Q9,H2-M1,H2-M10.5	14972,14985,14990,14991,15018,15040,15481,16159,16160,16197,110557,110558,224756,224761
GO:0002483	antigen processing and presentation of endogenous peptide antigen	10	35	47	2.07342e-05	0.00255654	6.51672	H2-K1,H2-M10.1,H2-M2,H2-M3,H2-Q7,H2-T23,H2-Q6,H2-Q9,H2-M1,H2-M10.5	14972,14985,14990,14991,15018,15040,110557,110558,224756,224761
GO:0019885	antigen processing and presentation of endogenous peptide antigen via MHC class I	10	35	42	2.07342e-05	0.00255654	6.51672	H2-K1,H2-M10.1,H2-M2,H2-M3,H2-Q7,H2-T23,H2-Q6,H2-Q9,H2-M1,H2-M10.5	14972,14985,14990,14991,15018,15040,110557,110558,224756,224761
GO:0046641	positive regulation of alpha-beta T cell proliferation	6	22	26	0.00128017	0.0437697	6.09079	Cd80,H2-T23,Il12b,Cd244a,Ptpn22,Tnfsf4	12519,15040,16160,18106,19260,22164
GO:0019883	antigen processing and presentation of endogenous antigen	10	37	52	3.53658e-05	0.00362752	6.03337	H2-K1,H2-M10.1,H2-M2,H2-M3,H2-Q7,H2-T23,H2-Q6,H2-Q9,H2-M1,H2-M10.5	14972,14985,14990,14991,15018,15040,110557,110558,224756,224761
GO:0001913	T cell mediated cytotoxicity	19	71	88	1.42211e-08	3.06323e-05	5.99198	Ctsc,Gzmb,H2-K1,H2-M10.1,H2-M2,H2-M3,H2-Q7,H2-T23,Hspa8,Il12a,Il12b,Il7r,Serpinb9,Stx11,H2-Q6,H2-Q9,H2-M1,H2-M10.5,Mill1	13032,14939,14972,14985,14990,14991,15018,15040,15481,16159,16160,16197,20723,74732,110557,110558,224756,224761,266815
GO:0002825	regulation of T-helper 1 type immune response	8	30	36	0.000238621	0.0165803	5.91479	H2-Ab1,Il12b,Il12rb1,Il18r1,Il4ra,Il1rl1,Tnfsf4,Il27	14961,16160,16161,16182,16190,17082,22164,246779
GO:0002474	antigen processing and presentation of peptide antigen via MHC class I	11	44	62	3.21694e-05	0.00362752	5.43249	H2-K1,H2-M10.1,H2-M2,H2-M3,H2-Q7,H2-T23,H2-Q6,H2-Q9,Tapbpl,H2-M1,H2-M10.5	14972,14985,14990,14991,15018,15040,110557,110558,213233,224756,224761
GO:0036475	neuron death in response to oxidative stress	8	32	41	0.000386522	0.02102	5.42075	Atf4,Il10,Rest,Trpm2,Tsc1,Meak7,Oxr1,Ncoa7	11911,16153,19712,28240,64930,74347,170719,211329
GO:1903203	regulation of oxidative stress-induced neuron death	8	32	41	0.000386522	0.02102	5.42075	Atf4,Il10,Rest,Trpm2,Tsc1,Meak7,Oxr1,Ncoa7	11911,16153,19712,28240,64930,74347,170719,211329
GO:0021591	ventricular system development	8	33	34	0.000484421	0.0237146	5.20417	Mnat1,Pax5,Kdm2b,Celsr2,Ak8,Rapgef2,Ulk4,Sema6d	17420,18507,30841,53883,68870,76089,209012,214968
GO:0019884	antigen processing and presentation of exogenous antigen	7	29	35	0.00112113	0.0401671	5.1709	H2-Aa,H2-Ab1,H2-Eb1,H2-K1,H2-M3,H2-DMb2,H2-T23	14960,14961,14969,14972,14991,15000,15040
GO:0048002	antigen processing and presentation of peptide antigen	15	63	94	2.378e-06	0.000839078	5.10763	H2-Aa,H2-Ab1,H2-Eb1,H2-K1,H2-M10.1,H2-M2,H2-M3,H2-DMb2,H2-Q7,H2-T23,H2-Q6,H2-Q9,Tapbpl,H2-M1,H2-M10.5	14960,14961,14969,14972,14985,14990,14991,15000,15018,15040,110557,110558,213233,224756,224761
GO:0002711	positive regulation of T cell mediated immunity	15	66	84	4.43286e-06	0.000954838	4.80594	H2-K1,H2-M10.1,H2-M2,H2-M3,H2-Q7,H2-T23,Hspa8,Il12a,Il12b,Il18r1,Tnfsf4,H2-Q6,H2-Q9,H2-M1,H2-M10.5	14972,14985,14990,14991,15018,15040,15481,16159,16160,16182,22164,110557,110558,224756,224761
GO:0002709	regulation of T cell mediated immunity	17	89	111	1.27235e-05	0.00182709	3.8607	H2-K1,H2-M10.1,H2-M2,H2-M3,H2-Q7,H2-T23,Hspa8,Il12a,Il12b,Il18r1,Il7r,Tnfsf4,Dusp22,H2-Q6,H2-Q9,H2-M1,H2-M10.5	14972,14985,14990,14991,15018,15040,15481,16159,16160,16182,16197,22164,105352,110557,110558,224756,224761
GO:0042088	T-helper 1 type immune response	9	48	60	0.00159636	0.0498343	3.75354	H2-Ab1,Il12a,Il12b,Il12rb1,Il18r1,Il4ra,Il1rl1,Tnfsf4,Il27	14961,16159,16160,16161,16182,16190,17082,22164,246779
GO:0002456	T cell mediated immunity	23	131	162	1.86086e-06	0.000839078	3.49453	Aire,Ctsc,Gzmb,H2-K1,H2-M10.1,H2-M2,H2-M3,H2-Q7,H2-T23,Hspa8,Il12a,Il12b,Il18r1,Il7r,Serpinb9,Tnfsf4,Stx11,Dusp22,H2-Q6,H2-Q9,H2-M1,H2-M10.5,Mill1	11634,13032,14939,14972,14985,14990,14991,15018,15040,15481,16159,16160,16182,16197,20723,22164,74732,105352,110557,110558,224756,224761,266815
GO:0001912	positive regulation of leukocyte mediated cytotoxicity	14	80	110	0.000194031	0.0142368	3.46072	H2-K1,H2-M10.1,H2-M2,H2-M3,H2-Q7,H2-T23,Hspa8,Il12a,Il12b,H2-Q6,H2-Q9,H2-M1,H2-M10.5,Mill1	14972,14985,14990,14991,15018,15040,15481,16159,16160,110557,110558,224756,224761,266815
GO:0001910	regulation of leukocyte mediated cytotoxicity	17	103	139	8.93868e-05	0.00740535	3.23017	H2-K1,H2-M10.1,H2-M2,H2-M3,H2-Q7,H2-T23,Hspa8,Il12a,Il12b,Il7r,Serpinb9,Clec2d,H2-Q6,H2-Q9,H2-M1,H2-M10.5,Mill1	14972,14985,14990,14991,15018,15040,15481,16159,16160,16197,20723,93694,110557,110558,224756,224761,266815
GO:0031343	positive regulation of cell killing	15	93	126	0.000295531	0.0190313	3.13825	H2-K1,H2-M10.1,H2-M2,H2-M3,H2-Q7,H2-T23,Hspa8,Il12a,Il12b,H2-Q6,H2-Q9,H2-M1,H2-M10.5,Mill1,Pglyrp4	14972,14985,14990,14991,15018,15040,15481,16159,16160,110557,110558,224756,224761,266815,384997
GO:0002824	positive regulation of adaptive immune response based on somatic recombination of immune receptors built from immunoglobulin superfamily domains	20	128	167	4.98304e-05	0.00466673	3.0306	Cd4,H2-Ab1,H2-K1,H2-M10.1,H2-M2,H2-M3,H2-Q7,H2-T23,Hspa8,Il12a,Il12b,Il12rb1,Il18r1,Cd40,Tnfsf4,Trp53bp1,H2-Q6,H2-Q9,H2-M1,H2-M10.5	12504,14961,14972,14985,14990,14991,15018,15040,15481,16159,16160,16161,16182,21939,22164,27223,110557,110558,224756,224761
GO:0002821	positive regulation of adaptive immune response	21	135	175	3.49101e-05	0.00362752	3.01637	Cd4,Cd44,H2-Ab1,H2-K1,H2-M10.1,H2-M2,H2-M3,H2-Q7,H2-T23,Hspa8,Il12a,Il12b,Il12rb1,Il18r1,Cd40,Tnfsf4,Trp53bp1,H2-Q6,H2-Q9,H2-M1,H2-M10.5	12504,12505,14961,14972,14985,14990,14991,15018,15040,15481,16159,16160,16161,16182,21939,22164,27223,110557,110558,224756,224761
GO:1903038	negative regulation of leukocyte cell-cell adhesion	20	130	163	6.24013e-05	0.00560052	2.97518	Runx1,Cd44,Cd80,H2-Aa,H2-Ab1,H2-M3,Il4ra,Loxl3,Mad1l1,Ptpn22,Ccl25,Tnfsf4,Pdcd1lg2,Dlg5,Cyld,Dusp22,Adtrp,Wnk1,Btn2a2,Skint2	12394,12505,12519,14960,14961,14991,16190,16950,17120,19260,20300,22164,58205,71228,74256,105352,109254,232341,238555,329919
GO:0007605	sensory perception of sound	23	151	312	2.13638e-05	0.00255654	2.94534	Chrnb2,Atp2b2,Dnm1,Eya4,Mbp,Rest,Six1,Tmie,Tecta,Tectb,Ccdc50,Nav2,Otof,Grm7,Fbxo11,Espnl,Ptprq,Otoa,Tspear,Myo3b,Grxcr2,Grxcr1,Chrna10	11444,11941,13429,14051,17196,19712,20471,20776,21683,21684,67501,78286,83762,108073,225055,227357,237523,246190,252974,329421,332309,433899,504186
GO:0032649	regulation of interferon-gamma production	16	106	139	0.000408861	0.0214802	2.90185	Runx1,H2-M3,Il10,Il12a,Il12b,Il12rb1,Il18r1,Il1rl1,Cd244a,Ptpn22,Tnfsf4,Pglyrp2,Pdcd1lg2,H2-Q9,Il27,Pglyrp4	12394,14991,16153,16159,16160,16161,16182,17082,18106,19260,22164,57757,58205,110558,246779,384997
GO:0001909	leukocyte mediated cytotoxicity	20	133	179	8.65535e-05	0.00740535	2.89573	Ctsc,Gzmb,H2-K1,H2-M10.1,H2-M2,H2-M3,H2-Q7,H2-T23,Hspa8,Il12a,Il12b,Il7r,Serpinb9,Stx11,Clec2d,H2-Q6,H2-Q9,H2-M1,H2-M10.5,Mill1	13032,14939,14972,14985,14990,14991,15018,15040,15481,16159,16160,16197,20723,74732,93694,110557,110558,224756,224761,266815
GO:0050954	sensory perception of mechanical stimulus	27	181	342	6.34063e-06	0.00113814	2.8801	Chrnb2,Atp2b2,Cacnb3,Dnm1,Eya4,Htr7,Igf1,Mbp,Rest,Six1,Tmie,Tecta,Tectb,Ccdc50,Nav2,Otof,Grm7,Asic3,Fbxo11,Espnl,Ptprq,Otoa,Tspear,Myo3b,Grxcr2,Grxcr1,Chrna10	11444,11941,12297,13429,14051,15566,16000,17196,19712,20471,20776,21683,21684,67501,78286,83762,108073,171209,225055,227357,237523,246190,252974,329421,332309,433899,504186
GO:0019882	antigen processing and presentation	15	100	148	0.000655412	0.0282352	2.87874	H2-Aa,H2-Ab1,H2-Eb1,H2-K1,H2-M10.1,H2-M2,H2-M3,H2-DMb2,H2-Q7,H2-T23,H2-Q6,H2-Q9,Tapbpl,H2-M1,H2-M10.5	14960,14961,14969,14972,14985,14990,14991,15000,15018,15040,110557,110558,213233,224756,224761
GO:0002822	regulation of adaptive immune response based on somatic recombination of immune receptors built from immunoglobulin superfamily domains	26	175	225	1.0067e-05	0.00166802	2.8647	Cd4,H2-Ab1,H2-K1,H2-M10.1,H2-M2,H2-M3,H2-Q7,H2-T23,Hspa8,Il12a,Il12b,Il12rb1,Il18r1,Il4ra,Il7r,Loxl3,Il1rl1,Cd40,Tnfsf4,Trp53bp1,Dusp22,H2-Q6,H2-Q9,H2-M1,H2-M10.5,Il27	12504,14961,14972,14985,14990,14991,15018,15040,15481,16159,16160,16161,16182,16190,16197,16950,17082,21939,22164,27223,105352,110557,110558,224756,224761,246779
GO:0002819	regulation of adaptive immune response	28	191	242	6.0497e-06	0.00113814	2.82302	Cd80,H2-T23,Il12b,Cd244a,Ptpn22,Tnfsf4	11687,12504,12505,14961,14972,14985,14990,14991,15018,15040,15481,16159,16160,16161,16182,16190,16197,16950,17082,21939,22164,27223,105352,110557,110558,224756,224761,246779
GO:1902106	negative regulation of leukocyte differentiation	15	102	122	0.00080972	0.0322988	2.81226	Runx1,Cd44,H2-M3,Il4ra,Loxl3,Nf1,Sfrp1,Tnfsf4,Pglyrp2,Tmem176a,Zbtb46,Cyld,Clec2d,Trib1,Pglyrp4	12394,12505,14991,16190,16950,18015,20377,22164,57757,66058,72147,74256,93694,211770,384997
GO:0031341	regulation of cell killing	18	124	163	0.000300401	0.0190313	2.77437	H2-K1,H2-M10.1,H2-M2,H2-M3,H2-Q7,H2-T23,Hspa8,Il12a,Il12b,Il7r,Serpinb9,Clec2d,H2-Q6,H2-Q9,H2-M1,H2-M10.5,Mill1,Pglyrp4	14972,14985,14990,14991,15018,15040,15481,16159,16160,16197,20723,93694,110557,110558,224756,224761,266815,384997
GO:0050868	negative regulation of T cell activation	17	118	151	0.000478117	0.0237146	2.74835	Runx1,Cd44,Cd80,H2-Aa,H2-Ab1,H2-M3,Il4ra,Loxl3,Mad1l1,Ptpn22,Tnfsf4,Pdcd1lg2,Dlg5,Cyld,Dusp22,Btn2a2,Skint2	12394,12505,12519,14960,14961,14991,16190,16950,17120,19260,22164,58205,71228,74256,105352,238555,329919
GO:0051250	negative regulation of lymphocyte activation	21	151	199	0.000181632	0.0142368	2.64275	Runx1,Cd44,Cd80,H2-Aa,H2-Ab1,H2-M3,Il10,Il4ra,Loxl3,Mad1l1,Ptpn22,Sfrp1,Tnfsf4,Pglyrp2,Pdcd1lg2,Dlg5,Cyld,Dusp22,Btn2a2,Skint2,Pglyrp4	12394,12505,12519,14960,14961,14991,16153,16190,16950,17120,19260,20377,22164,57757,58205,71228,74256,105352,238555,329919,384997
GO:0002708	positive regulation of lymphocyte mediated immunity	18	133	180	0.00071002	0.029126	2.55598	H2-K1,H2-M10.1,H2-M2,H2-M3,H2-Q7,H2-T23,Hspa8,Il12a,Il12b,Il18r1,Cd40,Tnfsf4,Trp53bp1,H2-Q6,H2-Q9,H2-M1,H2-M10.5,Mill1	14972,14985,14990,14991,15018,15040,15481,16159,16160,16182,21939,22164,27223,110557,110558,224756,224761,266815
GO:0032609	interferon-gamma production	16	119	158	0.00147122	0.0487519	2.53382	Runx1,H2-M3,Il10,Il12a,Il12b,Il12rb1,Il18r1,Il1rl1,Cd244a,Ptpn22,Tnfsf4,Pglyrp2,Pdcd1lg2,H2-Q9,Il27,Pglyrp4	12394,14991,16153,16159,16160,16161,16182,17082,18106,19260,22164,57757,58205,110558,246779,384997
GO:0010951	negative regulation of endopeptidase activity	23	174	206	0.000198284	0.0142368	2.49361	Serping1,Cd44,Cflar,Igf1,Mdm2,Serpinb2,Ptgs2,Serpini1,Serpinb9,Stfa2,Serpinb11,Rffl,Serpinb12,Serpina9,Spock3,Bcl2l12,Il24,Serpina3j,Serpinb1b,Serpina7,Serpinb3d,Serpinb6e,Serpina3i	12258,12505,12633,16000,17246,18788,19225,20713,20723,20862,66957,67338,71869,71907,72902,75736,93672,238395,282663,331535,394252,435350,628900
GO:0022408	negative regulation of cell-cell adhesion	24	185	226	0.000194474	0.0142368	2.44127	Runx1,Cd44,Cd80,H2-Aa,H2-Ab1,H2-M3,Il10,Il4ra,Loxl3,Epcam,Mad1l1,Mbp,Ptpn22,Ccl25,Tnfsf4,Pdcd1lg2,Dlg5,Cyld,Akna,Dusp22,Adtrp,Wnk1,Btn2a2,Skint2	12394,12505,12519,14960,14961,14991,16153,16190,16950,17075,17120,17196,19260,20300,22164,58205,71228,74256,100182,105352,109254,232341,238555,329919
GO:0002705	positive regulation of leukocyte mediated immunity	21	165	221	0.000614497	0.0275756	2.38425	H2-K1,H2-M10.1,H2-M2,H2-M3,H2-Q7,H2-T23,Hspa8,Il12a,Il12b,Il18r1,Il4ra,Cd40,Tnfsf4,Vamp8,Trp53bp1,Sphk2,H2-Q6,H2-Q9,H2-M1,H2-M10.5,Mill1	14972,14985,14990,14991,15018,15040,15481,16159,16160,16182,16190,21939,22164,22320,27223,56632,110557,110558,224756,224761,266815
GO:0001906	cell killing	21	169	223	0.000842499	0.0329953	2.31916	Ctsc,Gzmb,H2-K1,H2-M10.1,H2-M2,H2-M3,H2-Q7,H2-T23,Hspa8,Il12a,Il12b,Il7r,Serpinb9,Stx11,Clec2d,H2-Q6,H2-Q9,H2-M1,H2-M10.5,Mill1,Pglyrp4	13032,14939,14972,14985,14990,14991,15018,15040,15481,16159,16160,16197,20723,74732,93694,110557,110558,224756,224761,266815,384997
GO:0050870	positive regulation of T cell activation	23	186	259	0.000524059	0.025085	2.30854	Aif1,Runx1,Cd4,Cd80,H2-Aa,H2-Ab1,H2-M3,H2-T23,Igf1,Il12a,Il12b,Il12rb1,Il4ra,Il7,Il7r,Cd244a,Ptpn22,Tnfsf4,Lgals8,Pdcd1lg2,Cyld,Btn2a2,Skint1	11629,12394,12504,12519,14960,14961,14991,15040,16000,16159,16160,16161,16190,16196,16197,18106,19260,22164,56048,58205,74256,238555,639781
GO:0046631	alpha-beta T cell activation	19	154	200	0.00158367	0.0498343	2.29787	Runx1,Cd44,Cd80,H2-Ab1,H2-M3,H2-T23,Il12a,Il12b,Il18r1,Il4ra,Loxl3,Ly9,Cd244a,Ptpn22,Ncor1,Tnfsf4,Clec4f,Il27,Cdh26	12394,12505,12519,14961,14991,15040,16159,16160,16182,16190,16950,17085,18106,19260,20185,22164,51811,246779,381409
GO:0050777	negative regulation of immune response	19	154	189	0.00158367	0.0498343	2.29787	Alox15,Serping1,H2-M3,H2-T23,Il10,Il12b,Il13ra2,Il4ra,Il7r,Loxl3,Il1rl1,Serpinb9,Tnfsf4,Pglyrp2,Clec2d,Dusp22,Nlrc3,Olfm4,Pglyrp4	11687,12258,14991,15040,16153,16160,16165,16190,16197,16950,17082,20723,22164,57757,93694,105352,268857,380924,384997
GO:0002695	negative regulation of leukocyte activation	22	181	234	0.000864975	0.0332707	2.2623	Runx1,Cd44,Cd80,H2-Aa,H2-Ab1,H2-M3,Il10,Il13ra2,Il4ra,Loxl3,Mad1l1,Ptpn22,Sfrp1,Tnfsf4,Pglyrp2,Pdcd1lg2,Dlg5,Cyld,Dusp22,Btn2a2,Skint2,Pglyrp4	12394,12505,12519,14960,14961,14991,16153,16165,16190,16950,17120,19260,20377,22164,57757,58205,71228,74256,105352,238555,329919,384997
GO:0002706	regulation of lymphocyte mediated immunity	22	182	239	0.000931126	0.0351868	2.24778	H2-K1,H2-M10.1,H2-M2,H2-M3,H2-Q7,H2-T23,Hspa8,Il12a,Il12b,Il18r1,Il7r,Serpinb9,Cd40,Tnfsf4,Trp53bp1,Clec2d,Dusp22,H2-Q6,H2-Q9,H2-M1,H2-M10.5,Mill1	14972,14985,14990,14991,15018,15040,15481,16159,16160,16182,16197,20723,21939,22164,27223,93694,105352,110557,110558,224756,224761,266815
GO:1903039	positive regulation of leukocyte cell-cell adhesion	24	202	279	0.000716656	0.029126	2.20605	Aif1,Runx1,Cd4,Cd44,Cd80,H2-Aa,H2-Ab1,H2-M3,H2-T23,Igf1,Il12a,Il12b,Il12rb1,Il4ra,Il7,Il7r,Cd244a,Ptpn22,Tnfsf4,Lgals8,Pdcd1lg2,Cyld,Btn2a2,Skint1	11629,12394,12504,12505,12519,14960,14961,14991,15040,16000,16159,16160,16161,16190,16196,16197,18106,19260,22164,56048,58205,74256,238555,639781
GO:0050670	regulation of lymphocyte proliferation	26	222	300	0.000548255	0.0251264	2.1722	Chrnb2,Aif1,Cd4,Cd44,Cd80,H2-Aa,H2-Ab1,H2-M3,H2-T23,Igf1,Il10,Il12a,Il12b,Il12rb1,Il7,Mad1l1,Myd88,Cd244a,Ptpn22,Cd40,Tnfsf4,Pdcd1lg2,Dlg5,Slc39a10,Btn2a2,Il27	11444,11629,12504,12505,12519,14960,14961,14991,15040,16000,16153,16159,16160,16161,16196,17120,17874,18106,19260,21939,22164,58205,71228,227059,238555,246779
GO:0052548	regulation of endopeptidase activity	38	328	412	4.1855e-05	0.00409798	2.15799	Apaf1,Bak1,Serping1,Cd44,Cflar,Cideb,Hsf1,Igf1,Mbp,Mdm2,Mgmt,Serpinb2,Psma3,Ptgs2,Rest,S100a8,Serpini1,Serpinb9,Stfa2,Serpinb11,Rffl,Dapk1,Serpinb12,Serpina9,Spock3,Ift57,Bcl2l12,Il24,Senp1,Serpina3j,St18,Serpinb1b,Serpina7,Aim2,Serpinb3d,Hdac1,Serpinb6e,Serpina3i	11783,12018,12258,12505,12633,12684,15499,16000,17196,17246,17314,18788,19167,19225,19712,20201,20713,20723,20862,66957,67338,69635,71869,71907,72902,73916,75736,93672,223870,238395,240690,282663,331535,383619,394252,433759,435350,628900
GO:0022409	positive regulation of cell-cell adhesion	28	241	328	0.000390343	0.02102	2.15458	Aif1,Alox15,Runx1,Cd4,Cd44,Cd80,H2-Aa,H2-Ab1,H2-M3,H2-T23,Igf1,Il12a,Il12b,Il12rb1,Il4ra,Il7,Il7r,Itga6,Afdn,Cd244a,Ptpn22,Tnfsf4,Lgals8,Pdcd1lg2,Plpp3,Cyld,Btn2a2,Skint1	11629,11687,12394,12504,12505,12519,14960,14961,14991,15040,16000,16159,16160,16161,16190,16196,16197,16403,17356,18106,19260,22164,56048,58205,67916,74256,238555,639781
GO:0032944	regulation of mononuclear cell proliferation	26	224	302	0.000628311	0.02762	2.14991	Chrnb2,Aif1,Cd4,Cd44,Cd80,H2-Aa,H2-Ab1,H2-M3,H2-T23,Igf1,Il10,Il12a,Il12b,Il12rb1,Il7,Mad1l1,Myd88,Cd244a,Ptpn22,Cd40,Tnfsf4,Pdcd1lg2,Dlg5,Slc39a10,Btn2a2,Il27	11444,11629,12504,12505,12519,14960,14961,14991,15040,16000,16153,16159,16160,16161,16196,17120,17874,18106,19260,21939,22164,58205,71228,227059,238555,246779
GO:0050866	negative regulation of cell activation	23	202	257	0.0016244	0.0499852	2.10041	Runx1,Cd44,Cd80,H2-Aa,H2-Ab1,H2-M3,Il10,Il13ra2,Il4ra,Loxl3,Mad1l1,Pdgfa,Ptpn22,Sfrp1,Tnfsf4,Pglyrp2,Pdcd1lg2,Dlg5,Cyld,Dusp22,Btn2a2,Skint2,Pglyrp4	12394,12505,12519,14960,14961,14991,16153,16165,16190,16950,17120,18590,19260,20377,22164,57757,58205,71228,74256,105352,238555,329919,384997
GO:1903037	regulation of leukocyte cell-cell adhesion	32	285	402	0.000290086	0.0190313	2.0759	Aif1,Runx1,Cd4,Cd44,Cd80,H2-Aa,H2-Ab1,H2-M3,H2-T23,Igf1,Il12a,Il12b,Il12rb1,Il4ra,Il7,Il7r,Loxl3,Mad1l1,Cd244a,Ptpn22,Ccl25,Tnfsf4,Lgals8,Pdcd1lg2,Dlg5,Cyld,Dusp22,Adtrp,Wnk1,Btn2a2,Skint2,Skint1	11629,12394,12504,12505,12519,14960,14961,14991,15040,16000,16159,16160,16161,16190,16196,16197,16950,17120,18106,19260,20300,22164,56048,58205,71228,74256,105352,109254,232341,238555,329919,639781
GO:0051251	positive regulation of lymphocyte activation	29	258	494	0.000536524	0.0251233	2.07556	Chrnb2,Aif1,Runx1,Cd4,Cd80,H2-Aa,H2-Ab1,H2-M3,H2-T23,Igf1,Il12a,Il12b,Il12rb1,Il4ra,Il7,Il7r,Myd88,Cd244a,Ptpn22,Cd40,Tnfsf4,Trp53bp1,Lgals8,Pdcd1lg2,Cyld,Slc39a10,Tnip2,Btn2a2,Skint1	11444,11629,12394,12504,12519,14960,14961,14991,15040,16000,16159,16160,16161,16190,16196,16197,17874,18106,19260,21939,22164,27223,56048,58205,74256,227059,231130,238555,639781
GO:0070663	regulation of leukocyte proliferation	26	235	316	0.00127758	0.0437697	2.03565	Chrnb2,Aif1,Cd4,Cd44,Cd80,H2-Aa,H2-Ab1,H2-M3,H2-T23,Igf1,Il10,Il12a,Il12b,Il12rb1,Il7,Mad1l1,Myd88,Cd244a,Ptpn22,Cd40,Tnfsf4,Pdcd1lg2,Dlg5,Slc39a10,Btn2a2,Il27	11444,11629,12504,12505,12519,14960,14961,14991,15040,16000,16153,16159,16160,16161,16196,17120,17874,18106,19260,21939,22164,58205,71228,227059,238555,246779
GO:0002703	regulation of leukocyte mediated immunity	26	237	307	0.00144351	0.048583	2.01614	H2-K1,H2-M10.1,H2-M2,H2-M3,H2-Q7,H2-T23,Hspa8,Il12a,Il12b,Il13ra2,Il18r1,Il4ra,Il7r,Serpinb9,Cd40,Tnfsf4,Vamp8,Trp53bp1,Sphk2,Clec2d,Dusp22,H2-Q6,H2-Q9,H2-M1,H2-M10.5,Mill1	14972,14985,14990,14991,15018,15040,15481,16159,16160,16165,16182,16190,16197,20723,21939,22164,22320,27223,56632,93694,105352,110557,110558,224756,224761,266815
GO:0007159	leukocyte cell-cell adhesion	34	317	446	0.000446251	0.0228863	1.97216	Aif1,Runx1,Cd4,Cd44,Cd80,H2-Aa,H2-Ab1,H2-M3,H2-T23,Igf1,Il12a,Il12b,Il12rb1,Il4ra,Il7,Il7r,Loxl3,Mad1l1,Cd244a,Ptpn22,S100a8,Ccl25,Tnfsf4,Lgals8,Tnip1,Pdcd1lg2,Dlg5,Cyld,Dusp22,Adtrp,Wnk1,Btn2a2,Skint2,Skint1	11629,12394,12504,12505,12519,14960,14961,14991,15040,16000,16159,16160,16161,16190,16196,16197,16950,17120,18106,19260,20201,20300,22164,56048,57783,58205,71228,74256,105352,109254,232341,238555,329919,639781
GO:0050863	regulation of T cell activation	32	300	433	0.000711298	0.029126	1.95812	Aif1,Runx1,Cd4,Cd44,Cd80,Csk,H2-Aa,H2-Ab1,H2-M3,H2-T23,Foxn1,Igf1,Il12a,Il12b,Il12rb1,Il4ra,Il7,Il7r,Loxl3,Mad1l1,Cd244a,Ptpn22,Tnfsf4,Lgals8,Pdcd1lg2,Dlg5,Cyld,Dusp22,Btn2a2,Il27,Skint2,Skint1	11629,12394,12504,12505,12519,12988,14960,14961,14991,15040,15218,16000,16159,16160,16161,16190,16196,16197,16950,17120,18106,19260,22164,56048,58205,71228,74256,105352,238555,246779,329919,639781
GO:1902105	regulation of leukocyte differentiation	30	288	373	0.00149379	0.0487519	1.90452	Apc,Runx1,Cd4,Cd44,Creb1,H2-Aa,H2-M3,Foxn1,Il12a,Il12b,Il4ra,Il7,Il7r,Loxl3,Nf1,Sfrp1,Tnfsf4,Pglyrp2,Tmem176a,Prxl2a,Zbtb46,Nfam1,Cyld,Clec2d,Trib1,Btn2a2,Il27,Pglyrp4,Siglec15,Skint1	11789,12394,12504,12505,12912,14960,14991,15218,16159,16160,16190,16196,16197,16950,18015,20377,22164,57757,66058,70564,72147,74039,74256,93694,211770,238555,246779,384997,620235,639781

## Sheet: Supp. Table 5
comparison	gene_id	IncLevelDifference	event	gene_category
immature_vs_Aire_KO	ENSMUSG00000021288	-0.228	A5SS	non-TRA
immature_vs_Aire_KO	ENSMUSG00000021288	-0.196	A5SS	non-TRA
immature_vs_Aire_KO	ENSMUSG00000029472	0.123	A5SS	non-TRA
immature_vs_Aire_KO	ENSMUSG00000021947	-0.339	A5SS	non-TRA
immature_vs_Aire_KO	ENSMUSG00000037824	0.647	A5SS	non-TRA
immature_vs_Aire_KO	ENSMUSG00000070733	-0.284	A5SS	non-TRA
immature_vs_Aire_KO	ENSMUSG00000070733	-0.221	A5SS	non-TRA
immature_vs_Aire_KO	ENSMUSG00000040111	0.164	A5SS	non-TRA
immature_vs_Aire_KO	ENSMUSG00000052631	0.808	A5SS	non-Aire TRA
immature_vs_Aire_KO	ENSMUSG00000047415	0.597	A5SS	non-TRA
immature_vs_Aire_KO	ENSMUSG00000008658	0.366	A5SS	non-Aire TRA
immature_vs_Aire_KO	ENSMUSG00000005540	0.65	A5SS	non-Aire TRA
immature_vs_Aire_KO	ENSMUSG00000022629	0.179	A5SS	non-TRA
immature_vs_Aire_KO	ENSMUSG00000041771	0.373	A5SS	non-Aire TRA
immature_vs_Aire_KO	ENSMUSG00000071669	-0.194	A5SS	non-TRA
immature_vs_Aire_KO	ENSMUSG00000068036	-0.289	A5SS	non-TRA
immature_vs_Aire_KO	ENSMUSG00000062012	-0.225	A5SS	non-TRA
immature_vs_Aire_KO	ENSMUSG00000027455	0.147	A5SS	non-TRA
immature_vs_Aire_KO	ENSMUSG00000043333	0.196	A5SS	non-Aire TRA
immature_vs_Aire_KO	ENSMUSG00000026042	-0.351	A5SS	non-TRA
immature_vs_Aire_KO	ENSMUSG00000000731	-0.915	A5SS	non-Aire TRA
immature_vs_Aire_KO	ENSMUSG00000018334	0.404	A5SS	non-TRA
immature_vs_Aire_KO	ENSMUSG00000022517	0.033	A5SS	non-TRA
immature_vs_Aire_KO	ENSMUSG00000025085	0.145	A5SS	non-TRA
immature_vs_Aire_KO	ENSMUSG00000035852	0.166	A5SS	non-Aire TRA
immature_vs_Aire_KO	ENSMUSG00000020993	0.071	A5SS	non-TRA
immature_vs_Aire_KO	ENSMUSG00000029106	-0.13	A5SS	non-TRA
immature_vs_Aire_KO	ENSMUSG00000059586	0.06	A5SS	non-TRA
immature_vs_Aire_KO	ENSMUSG00000021027	0.226	A5SS	non-TRA
immature_vs_Aire_KO	ENSMUSG00000027474	0.887	A5SS	non-TRA
immature_vs_Aire_KO	ENSMUSG00000083282	0.626	A5SS	non-TRA
immature_vs_Aire_KO	ENSMUSG00000016495	0.159	A5SS	non-TRA
immature_vs_Aire_KO	ENSMUSG00000041654	0.026	A5SS	non-TRA
immature_vs_Aire_KO	ENSMUSG00000028898	0.159	A5SS	non-TRA
immature_vs_Aire_KO	ENSMUSG00000025374	0.02	A5SS	non-TRA
immature_vs_Aire_KO	ENSMUSG00000058240	-0.146	A5SS	non-TRA
immature_vs_Aire_KO	ENSMUSG00000028048	0.073	A5SS	non-TRA
immature_vs_Aire_KO	ENSMUSG00000054387	0.303	A5SS	non-TRA
immature_vs_Aire_KO	ENSMUSG00000022139	0.02	A5SS	non-TRA
immature_vs_Aire_KO	ENSMUSG00000060568	0.068	A5SS	non-TRA
immature_vs_Aire_KO	ENSMUSG00000026131	0.059	A5SS	non-TRA
immature_vs_Aire_KO	ENSMUSG00000033543	0.028	A5SS	non-TRA
immature_vs_Aire_KO	ENSMUSG00000020758	0.101	A5SS	non-TRA
immature_vs_Aire_KO	ENSMUSG00000031024	0.403	A5SS	non-TRA
immature_vs_Aire_KO	ENSMUSG00000031024	0.536	A5SS	non-TRA
immature_vs_Aire_KO	ENSMUSG00000073468	0.095	A5SS	non-TRA
immature_vs_Aire_KO	ENSMUSG00000023967	0.054	A5SS	non-TRA
immature_vs_Aire_KO	ENSMUSG00000026005	0.092	A5SS	non-TRA
immature_vs_Aire_KO	ENSMUSG00000032366	0.094	A5SS	non-TRA
immature_vs_Aire_KO	ENSMUSG00000067365	0.036	A5SS	non-TRA
immature_vs_Aire_KO	ENSMUSG00000037992	-0.144	A5SS	non-TRA
immature_vs_Aire_KO	ENSMUSG00000038022	-0.375	A5SS	non-TRA
immature_vs_Aire_KO	ENSMUSG00000022960	0.254	A5SS	non-TRA
immature_vs_Aire_KO	ENSMUSG00000019373	0.048	A5SS	non-TRA
immature_vs_Aire_KO	ENSMUSG00000068290	0.094	A5SS	non-TRA
immature_vs_Aire_KO	ENSMUSG00000025747	0.056	A5SS	non-TRA
immature_vs_Aire_KO	ENSMUSG00000089917	0.101	A5SS	non-TRA
immature_vs_Aire_KO	ENSMUSG00000026005	0.091	A5SS	non-TRA
immature_vs_Aire_KO	ENSMUSG00000019261	0.07	A5SS	non-TRA
immature_vs_Aire_KO	ENSMUSG00000040351	0.077	A5SS	non-TRA
immature_vs_Aire_KO	ENSMUSG00000029206	0.659	A5SS	non-Aire TRA
immature_vs_Aire_KO	ENSMUSG00000021772	0.138	A5SS	non-TRA
immature_vs_Aire_KO	ENSMUSG00000017176	0.113	A5SS	non-TRA
immature_vs_Aire_KO	ENSMUSG00000059669	0.045	A5SS	non-TRA
immature_vs_Aire_KO	ENSMUSG00000105340	0.07	A5SS	non-TRA
immature_vs_Aire_KO	ENSMUSG00000031024	0.034	A5SS	non-TRA
immature_vs_Aire_KO	ENSMUSG00000026790	0.124	A5SS	non-TRA
immature_vs_Aire_KO	ENSMUSG00000002496	0.138	A5SS	non-TRA
immature_vs_Aire_KO	ENSMUSG00000021209	1	A5SS	Aire-regulated TRA
immature_vs_Aire_KO	ENSMUSG00000028552	0.022	A5SS	non-TRA
immature_vs_Aire_KO	ENSMUSG00000030189	0.029	A5SS	non-TRA
immature_vs_Aire_KO	ENSMUSG00000024045	0.301	A5SS	non-TRA
immature_vs_Aire_KO	ENSMUSG00000022185	0.133	A5SS	non-TRA
immature_vs_Aire_KO	ENSMUSG00000021192	0.041	A5SS	non-TRA
immature_vs_Aire_KO	ENSMUSG00000022185	0.133	A5SS	non-TRA
immature_vs_Aire_KO	ENSMUSG00000022185	0.133	A5SS	non-TRA
immature_vs_Aire_KO	ENSMUSG00000023994	0.432	A5SS	non-TRA
immature_vs_Aire_KO	ENSMUSG00000027652	-0.198	A5SS	non-TRA
immature_vs_Aire_KO	ENSMUSG00000015127	0.389	A5SS	non-TRA
immature_vs_Aire_KO	ENSMUSG00000032309	0.053	A5SS	non-TRA
immature_vs_Aire_KO	ENSMUSG00000005774	-0.161	A5SS	non-TRA
immature_vs_Aire_KO	ENSMUSG00000036501	0.051	A5SS	non-TRA
immature_vs_Aire_KO	ENSMUSG00000035674	0.017	A5SS	non-TRA
immature_vs_Aire_KO	ENSMUSG00000057411	0.138	A5SS	non-TRA
immature_vs_Aire_KO	ENSMUSG00000019487	0.091	A5SS	non-TRA
immature_vs_Aire_KO	ENSMUSG00000027940	0.027	A5SS	non-TRA
immature_vs_Aire_KO	ENSMUSG00000053510	0.068	A5SS	non-TRA
immature_vs_Aire_KO	ENSMUSG00000064215	0.21	A5SS	non-TRA
immature_vs_Aire_KO	ENSMUSG00000037787	0.028	A5SS	non-TRA
immature_vs_Aire_KO	ENSMUSG00000017897	0.052	A5SS	non-TRA
immature_vs_Aire_KO	ENSMUSG00000034574	0.126	A5SS	non-TRA
immature_vs_Aire_KO	ENSMUSG00000016495	0.114	A5SS	non-TRA
immature_vs_Aire_KO	ENSMUSG00000027708	0.389	A5SS	non-TRA
immature_vs_Aire_KO	ENSMUSG00000018395	0.144	A5SS	non-TRA
immature_vs_Aire_KO	ENSMUSG00000089917	0.119	A5SS	non-TRA
immature_vs_Aire_KO	ENSMUSG00000002020	-0.036	A5SS	non-TRA
immature_vs_Aire_KO	ENSMUSG00000055296	0.109	A5SS	non-TRA
immature_vs_Aire_KO	ENSMUSG00000033543	0.054	A5SS	non-TRA
immature_vs_Aire_KO	ENSMUSG00000038235	0.029	A5SS	non-TRA
immature_vs_Aire_KO	ENSMUSG00000034227	-0.051	A5SS	non-TRA
immature_vs_Aire_KO	ENSMUSG00000020515	0.197	A5SS	non-TRA
immature_vs_Aire_KO	ENSMUSG00000016495	0.204	A5SS	non-TRA
immature_vs_Aire_KO	ENSMUSG00000027635	0.416	A5SS	non-TRA
immature_vs_Aire_KO	ENSMUSG00000024381	0.813	A5SS	non-TRA
immature_vs_Aire_KO	ENSMUSG00000000127	0.528	A5SS	non-TRA
immature_vs_Aire_KO	ENSMUSG00000029221	0.107	A5SS	non-TRA
immature_vs_Aire_KO	ENSMUSG00000055436	0.116	A5SS	non-TRA
immature_vs_Aire_KO	ENSMUSG00000038831	0.685	A5SS	non-TRA
immature_vs_Aire_KO	ENSMUSG00000034480	0.592	A5SS	non-TRA
immature_vs_Aire_KO	ENSMUSG00000023067	0.157	A5SS	non-TRA
immature_vs_Aire_KO	ENSMUSG00000059456	-0.31	A5SS	non-TRA
immature_vs_Aire_KO	ENSMUSG00000022146	0.419	A5SS	non-TRA
immature_vs_Aire_KO	ENSMUSG00000071172	0.117	A5SS	non-TRA
immature_vs_Aire_KO	ENSMUSG00000024381	0.073	A5SS	non-TRA
immature_vs_Aire_KO	ENSMUSG00000025188	0.085	A5SS	non-TRA
immature_vs_Aire_KO	ENSMUSG00000027957	0.057	A5SS	non-TRA
immature_vs_Aire_KO	ENSMUSG00000031024	0.033	A5SS	non-TRA
immature_vs_Aire_KO	ENSMUSG00000025958	0.127	A5SS	non-TRA
immature_vs_Aire_KO	ENSMUSG00000041926	0.032	A5SS	non-TRA
immature_vs_Aire_KO	ENSMUSG00000061518	0.024	A5SS	non-TRA
immature_vs_Aire_KO	ENSMUSG00000025364	0.022	A5SS	non-TRA
immature_vs_Aire_KO	ENSMUSG00000032187	0.018	A5SS	non-TRA
immature_vs_Aire_KO	ENSMUSG00000056228	0.197	A5SS	non-TRA
immature_vs_Aire_KO	ENSMUSG00000026941	0.667	A5SS	non-TRA
immature_vs_Aire_KO	ENSMUSG00000064215	0.024	A5SS	non-TRA
immature_vs_Aire_KO	ENSMUSG00000057375	0.013	A5SS	non-TRA
immature_vs_Aire_KO	ENSMUSG00000033918	0.059	A5SS	non-TRA
immature_vs_Aire_KO	ENSMUSG00000057342	-0.168	A5SS	non-TRA
immature_vs_Aire_KO	ENSMUSG00000071454	0.055	A5SS	non-TRA
immature_vs_Aire_KO	ENSMUSG00000018820	0.141	A5SS	non-TRA
immature_vs_Aire_KO	ENSMUSG00000025221	0.768	A5SS	non-Aire TRA
immature_vs_Aire_KO	ENSMUSG00000055322	-0.573	A5SS	non-TRA
immature_vs_Aire_KO	ENSMUSG00000018401	0.068	A5SS	non-TRA
immature_vs_Aire_KO	ENSMUSG00000033808	0.053	A5SS	non-TRA
immature_vs_Aire_KO	ENSMUSG00000032299	0.118	A5SS	non-TRA
immature_vs_Aire_KO	ENSMUSG00000022629	0.02	A5SS	non-TRA
immature_vs_Aire_KO	ENSMUSG00000060147	0.039	A5SS	non-TRA
immature_vs_Aire_KO	ENSMUSG00000041654	0.114	A5SS	non-TRA
immature_vs_Aire_KO	ENSMUSG00000022124	0.414	A5SS	non-TRA
immature_vs_Aire_KO	ENSMUSG00000039316	0.053	A5SS	non-TRA
immature_vs_Aire_KO	ENSMUSG00000006498	0.039	A5SS	non-TRA
immature_vs_Aire_KO	ENSMUSG00000035762	0.27	A5SS	non-TRA
immature_vs_Aire_KO	ENSMUSG00000062683	0.09	A5SS	non-TRA
immature_vs_Aire_KO	ENSMUSG00000066571	-0.715	A5SS	non-TRA
immature_vs_Aire_KO	ENSMUSG00000030232	0.379	A5SS	non-TRA
immature_vs_Aire_KO	ENSMUSG00000027901	0.05	A5SS	non-TRA
immature_vs_Aire_KO	ENSMUSG00000047284	0.104	A5SS	non-TRA
immature_vs_Aire_KO	ENSMUSG00000050002	0.31	A5SS	non-TRA
immature_vs_Aire_KO	ENSMUSG00000034227	-0.047	A5SS	non-TRA
immature_vs_Aire_KO	ENSMUSG00000005907	0.49	A5SS	non-TRA
immature_vs_Aire_KO	ENSMUSG00000041477	0.113	A5SS	non-TRA
immature_vs_Aire_KO	ENSMUSG00000022791	-0.051	A5SS	non-TRA
immature_vs_Aire_KO	ENSMUSG00000010051	0.222	A5SS	non-TRA
immature_vs_Aire_KO	ENSMUSG00000031808	0.142	A5SS	non-TRA
immature_vs_Aire_KO	ENSMUSG00000074151	0.286	A5SS	non-TRA
immature_vs_Aire_KO	ENSMUSG00000040410	0.044	A5SS	non-TRA
immature_vs_Aire_KO	ENSMUSG00000026576	0.014	A5SS	non-TRA
immature_vs_Aire_KO	ENSMUSG00000041429	0.108	A5SS	non-TRA
immature_vs_Aire_KO	ENSMUSG00000021417	0.05	A5SS	non-TRA
immature_vs_Aire_KO	ENSMUSG00000025558	-0.12	A5SS	non-TRA
immature_vs_Aire_KO	ENSMUSG00000038023	0.043	A5SS	non-TRA
immature_vs_Aire_KO	ENSMUSG00000024163	0.259	A5SS	non-TRA
immature_vs_Aire_KO	ENSMUSG00000021139	0.03	A5SS	non-TRA
immature_vs_Aire_KO	ENSMUSG00000035027	0.02	A5SS	non-TRA
immature_vs_Aire_KO	ENSMUSG00000038014	0.045	A5SS	non-TRA
immature_vs_Aire_KO	ENSMUSG00000019942	0.1	A5SS	non-TRA
immature_vs_Aire_KO	ENSMUSG00000037548	0.112	A5SS	non-Aire TRA
immature_vs_Aire_KO	ENSMUSG00000015757	0.043	A5SS	non-TRA
immature_vs_Aire_KO	ENSMUSG00000027635	0.432	A5SS	non-TRA
immature_vs_Aire_KO	ENSMUSG00000026761	0.103	A5SS	non-TRA
immature_vs_Aire_KO	ENSMUSG00000026159	0.025	A5SS	non-TRA
immature_vs_Aire_KO	ENSMUSG00000061904	0.043	A5SS	non-TRA
immature_vs_Aire_KO	ENSMUSG00000000804	-0.382	A5SS	non-TRA
immature_vs_Aire_KO	ENSMUSG00000028268	0.048	A5SS	non-TRA
immature_vs_Aire_KO	ENSMUSG00000028256	0.281	A5SS	non-TRA
immature_vs_Aire_KO	ENSMUSG00000016495	0.103	A5SS	non-TRA
immature_vs_Aire_KO	ENSMUSG00000020744	0.139	A5SS	non-TRA
immature_vs_Aire_KO	ENSMUSG00000022750	0.224	A5SS	non-TRA
immature_vs_Aire_KO	ENSMUSG00000064109	0.522	A5SS	non-TRA
immature_vs_Aire_KO	ENSMUSG00000051154	0.051	A5SS	non-TRA
immature_vs_Aire_KO	ENSMUSG00000020124	0.427	A5SS	non-TRA
immature_vs_Aire_KO	ENSMUSG00000036882	0.554	A5SS	non-TRA
immature_vs_Aire_KO	ENSMUSG00000097075	0.475	A5SS	non-Aire TRA
immature_vs_Aire_KO	ENSMUSG00000027287	0.022	A5SS	non-TRA
immature_vs_Aire_KO	ENSMUSG00000026576	0.017	A5SS	non-TRA
immature_vs_Aire_KO	ENSMUSG00000002908	0.591	A5SS	non-TRA
immature_vs_Aire_KO	ENSMUSG00000028078	0.535	A5SS	non-TRA
immature_vs_Aire_KO	ENSMUSG00000020876	0.16	A5SS	non-TRA
immature_vs_Aire_KO	ENSMUSG00000024097	0.093	A5SS	non-TRA
immature_vs_Aire_KO	ENSMUSG00000050608	0.015	A5SS	non-TRA
immature_vs_Aire_KO	ENSMUSG00000056228	0.147	A5SS	non-TRA
immature_vs_Aire_KO	ENSMUSG00000027222	0.058	A5SS	non-TRA
immature_vs_Aire_KO	ENSMUSG00000024833	-0.076	A5SS	non-TRA
immature_vs_Aire_KO	ENSMUSG00000035186	0.602	A5SS	non-Aire TRA
immature_vs_Aire_KO	ENSMUSG00000029134	0.586	A5SS	non-Aire TRA
immature_vs_Aire_KO	ENSMUSG00000089917	0.349	A5SS	non-TRA
immature_vs_Aire_KO	ENSMUSG00000031169	-0.679	A5SS	non-TRA
immature_vs_Aire_KO	ENSMUSG00000028621	0.1	A5SS	non-TRA
immature_vs_Aire_KO	ENSMUSG00000039361	0.131	A5SS	non-TRA
immature_vs_Aire_KO	ENSMUSG00000029438	0.122	A5SS	non-TRA
immature_vs_Aire_KO	ENSMUSG00000023206	0.208	A5SS	non-TRA
immature_vs_Aire_KO	ENSMUSG00000021171	0.017	A5SS	non-TRA
immature_vs_Aire_KO	ENSMUSG00000049295	-0.465	A5SS	non-TRA
immature_vs_Aire_KO	ENSMUSG00000013787	0.029	A5SS	non-TRA
immature_vs_Aire_KO	ENSMUSG00000106864	0.216	A5SS	non-TRA
immature_vs_Aire_KO	ENSMUSG00000061601	-0.16	A5SS	non-Aire TRA
immature_vs_Aire_KO	ENSMUSG00000055235	0.907	A5SS	non-TRA
immature_vs_Aire_KO	ENSMUSG00000058446	0.05	A5SS	non-TRA
immature_vs_Aire_KO	ENSMUSG00000069565	0.288	A5SS	non-TRA
immature_vs_Aire_KO	ENSMUSG00000031819	0.286	A5SS	non-TRA
immature_vs_Aire_KO	ENSMUSG00000038521	0.204	A5SS	non-TRA
immature_vs_Aire_KO	ENSMUSG00000029406	0.139	A5SS	non-TRA
immature_vs_Aire_KO	ENSMUSG00000056258	0.108	A5SS	non-Aire TRA
immature_vs_Aire_KO	ENSMUSG00000031858	0.085	A5SS	non-TRA
immature_vs_Aire_KO	ENSMUSG00000033543	0.03	A5SS	non-TRA
immature_vs_Aire_KO	ENSMUSG00000030276	0.495	A5SS	non-TRA
immature_vs_Aire_KO	ENSMUSG00000037999	0.099	A5SS	non-TRA
immature_vs_Aire_KO	ENSMUSG00000005510	0.024	A5SS	non-TRA
immature_vs_Aire_KO	ENSMUSG00000063524	-0.729	A5SS	non-TRA
immature_vs_Aire_KO	ENSMUSG00000004565	-0.253	A5SS	non-TRA
immature_vs_Aire_KO	ENSMUSG00000022750	0.205	A5SS	non-TRA
immature_vs_Aire_KO	ENSMUSG00000038975	0.071	A5SS	non-TRA
immature_vs_Aire_KO	ENSMUSG00000096255	0.052	A5SS	non-TRA
immature_vs_Aire_KO	ENSMUSG00000021091	0.176	A5SS	non-TRA
immature_vs_Aire_KO	ENSMUSG00000078671	-0.124	A5SS	non-TRA
immature_vs_Aire_KO	ENSMUSG00000021432	0.102	A5SS	non-TRA
immature_vs_Aire_KO	ENSMUSG00000026837	0.11	A5SS	non-TRA
immature_vs_Aire_KO	ENSMUSG00000069631	0.105	A5SS	non-TRA
immature_vs_Aire_KO	ENSMUSG00000024127	0.149	A5SS	non-TRA
immature_vs_Aire_KO	ENSMUSG00000024516	0.025	A5SS	non-TRA
immature_vs_Aire_KO	ENSMUSG00000027881	-0.114	A5SS	non-TRA
immature_vs_Aire_KO	ENSMUSG00000039105	0.02	A5SS	non-TRA
immature_vs_Aire_KO	ENSMUSG00000068663	0.099	A5SS	non-TRA
immature_vs_Aire_KO	ENSMUSG00000023147	0.117	A5SS	non-TRA
immature_vs_Aire_KO	ENSMUSG00000021065	0.033	A5SS	non-TRA
immature_vs_Aire_KO	ENSMUSG00000015143	0.014	A5SS	non-TRA
immature_vs_Aire_KO	ENSMUSG00000021314	0.469	A5SS	non-Aire TRA
immature_vs_Aire_KO	ENSMUSG00000023147	0.112	A5SS	non-TRA
immature_vs_Aire_KO	ENSMUSG00000044055	0.41	A5SS	non-Aire TRA
immature_vs_Aire_KO	ENSMUSG00000020124	0.387	A5SS	non-TRA
immature_vs_Aire_KO	ENSMUSG00000039105	0.02	A5SS	non-TRA
immature_vs_Aire_KO	ENSMUSG00000032737	0.275	A5SS	non-TRA
immature_vs_Aire_KO	ENSMUSG00000026843	0.035	A5SS	non-TRA
immature_vs_Aire_KO	ENSMUSG00000089773	-0.198	A5SS	non-Aire TRA
immature_vs_Aire_KO	ENSMUSG00000025220	0.08	A5SS	non-TRA
immature_vs_Aire_KO	ENSMUSG00000030104	0.034	A5SS	non-TRA
immature_vs_Aire_KO	ENSMUSG00000024383	0.041	A5SS	non-TRA
immature_vs_Aire_KO	ENSMUSG00000019054	0.012	A5SS	non-TRA
immature_vs_Aire_KO	ENSMUSG00000031712	-0.263	A5SS	non-TRA
immature_vs_Aire_KO	ENSMUSG00000026991	0.044	A5SS	non-TRA
immature_vs_Aire_KO	ENSMUSG00000031818	-0.019	A5SS	non-TRA
immature_vs_Aire_KO	ENSMUSG00000005610	0.024	A5SS	non-TRA
immature_vs_Aire_KO	ENSMUSG00000026193	-0.08	A5SS	non-TRA
immature_vs_Aire_KO	ENSMUSG00000040112	0.037	A5SS	non-TRA
immature_vs_Aire_KO	ENSMUSG00000030619	-0.046	A5SS	non-TRA
immature_vs_Aire_KO	ENSMUSG00000040606	0.055	A5SS	non-TRA
immature_vs_Aire_KO	ENSMUSG00000021493	-0.166	A5SS	non-TRA
immature_vs_Aire_KO	ENSMUSG00000022905	0.028	A5SS	non-TRA
immature_vs_Aire_KO	ENSMUSG00000038365	0.033	A5SS	non-TRA
immature_vs_Aire_KO	ENSMUSG00000029623	0.025	A5SS	non-TRA
immature_vs_Aire_KO	ENSMUSG00000014195	0.038	A5SS	non-TRA
immature_vs_Aire_KO	ENSMUSG00000015314	0.611	A5SS	non-Aire TRA
immature_vs_Aire_KO	ENSMUSG00000006435	-0.405	A5SS	non-TRA
immature_vs_Aire_KO	ENSMUSG00000023984	0.369	A5SS	non-TRA
immature_vs_Aire_KO	ENSMUSG00000021091	-0.214	A5SS	non-TRA
immature_vs_Aire_KO	ENSMUSG00000025509	0.047	A5SS	non-TRA
immature_vs_Aire_KO	ENSMUSG00000000827	-0.013	A5SS	non-TRA
immature_vs_Aire_KO	ENSMUSG00000026260	0.021	A5SS	non-TRA
immature_vs_Aire_KO	ENSMUSG00000027366	0.012	A5SS	non-TRA
immature_vs_Aire_KO	ENSMUSG00000034681	0.075	A5SS	non-TRA
immature_vs_Aire_KO	ENSMUSG00000023868	0.122	A5SS	non-TRA
immature_vs_Aire_KO	ENSMUSG00000051510	0.148	A5SS	non-TRA
immature_vs_Aire_KO	ENSMUSG00000011257	0.101	A5SS	non-TRA
immature_vs_Aire_KO	ENSMUSG00000038482	0.037	A5SS	non-TRA
immature_vs_Aire_KO	ENSMUSG00000049804	0.574	A5SS	non-Aire TRA
immature_vs_Aire_KO	ENSMUSG00000047030	0.361	A5SS	non-TRA
immature_vs_Aire_KO	ENSMUSG00000030826	0.099	A5SS	non-TRA
immature_vs_Aire_KO	ENSMUSG00000014852	0.379	A5SS	non-Aire TRA
immature_vs_Aire_KO	ENSMUSG00000021236	0.051	A5SS	non-TRA
immature_vs_Aire_KO	ENSMUSG00000027071	0.655	A5SS	non-Aire TRA
immature_vs_Aire_KO	ENSMUSG00000021314	0.391	A5SS	non-Aire TRA
immature_vs_Aire_KO	ENSMUSG00000020124	0.65	A5SS	non-TRA
immature_vs_Aire_KO	ENSMUSG00000111497	0.037	A5SS	non-TRA
immature_vs_Aire_KO	ENSMUSG00000007833	0.075	A5SS	non-TRA
immature_vs_Aire_KO	ENSMUSG00000058486	0.472	A5SS	non-TRA
immature_vs_Aire_KO	ENSMUSG00000002459	0.335	A5SS	non-Aire TRA
immature_vs_Aire_KO	ENSMUSG00000024036	0.712	A5SS	non-TRA
immature_vs_Aire_KO	ENSMUSG00000037716	0.528	A5SS	non-Aire TRA
immature_vs_Aire_KO	ENSMUSG00000031986	0.134	A5SS	non-TRA
immature_vs_Aire_KO	ENSMUSG00000027404	0.012	A5SS	non-TRA
immature_vs_Aire_KO	ENSMUSG00000075289	0.5	A5SS	non-TRA
immature_vs_Aire_KO	ENSMUSG00000040785	0.021	A5SS	non-TRA
immature_vs_Aire_KO	ENSMUSG00000029804	-0.454	A5SS	non-TRA
immature_vs_Aire_KO	ENSMUSG00000018293	0.01	A5SS	non-TRA
immature_vs_Aire_KO	ENSMUSG00000073609	0.241	A5SS	non-TRA
immature_vs_Aire_KO	ENSMUSG00000053565	0.016	A5SS	non-TRA
immature_vs_Aire_KO	ENSMUSG00000037652	0.045	A5SS	non-TRA
immature_vs_Aire_KO	ENSMUSG00000021572	0.465	A5SS	non-Aire TRA
immature_vs_Aire_KO	ENSMUSG00000064264	-0.143	A5SS	non-TRA
immature_vs_Aire_KO	ENSMUSG00000029655	-0.064	A5SS	non-TRA
immature_vs_Aire_KO	ENSMUSG00000024603	-0.027	A5SS	non-TRA
immature_vs_Aire_KO	ENSMUSG00000030834	0.697	A5SS	Aire-regulated TRA
immature_vs_Aire_KO	ENSMUSG00000027901	0.048	A5SS	non-TRA
immature_vs_Aire_KO	ENSMUSG00000022437	0.031	A5SS	non-TRA
immature_vs_Aire_KO	ENSMUSG00000036923	0.175	A5SS	non-Aire TRA
immature_vs_Aire_KO	ENSMUSG00000033508	0.553	A5SS	non-Aire TRA
immature_vs_Aire_KO	ENSMUSG00000058704	0.036	A5SS	non-TRA
immature_vs_Aire_KO	ENSMUSG00000027852	0.709	A5SS	non-TRA
immature_vs_Aire_KO	ENSMUSG00000040054	0.195	A5SS	non-TRA
immature_vs_Aire_KO	ENSMUSG00000105518	0.408	A5SS	non-Aire TRA
immature_vs_Aire_KO	ENSMUSG00000016756	0.482	A5SS	non-TRA
immature_vs_Aire_KO	ENSMUSG00000027882	0.017	A5SS	non-TRA
immature_vs_Aire_KO	ENSMUSG00000026589	-0.676	A5SS	non-TRA
immature_vs_Aire_KO	ENSMUSG00000002763	0.03	A5SS	non-TRA
immature_vs_Aire_KO	ENSMUSG00000066861	0.237	A5SS	non-TRA
immature_vs_Aire_KO	ENSMUSG00000031712	-0.272	A5SS	non-TRA
immature_vs_Aire_KO	ENSMUSG00000029478	-0.301	A5SS	non-TRA
immature_vs_Aire_KO	ENSMUSG00000031864	0.033	A5SS	non-TRA
immature_vs_Aire_KO	ENSMUSG00000037369	0.508	A5SS	non-TRA
immature_vs_Aire_KO	ENSMUSG00000041351	0.033	A5SS	non-TRA
immature_vs_Aire_KO	ENSMUSG00000001052	0.15	A5SS	non-TRA
immature_vs_Aire_KO	ENSMUSG00000058586	0.039	A5SS	non-TRA
immature_vs_Aire_KO	ENSMUSG00000027787	0.026	A5SS	non-TRA
immature_vs_Aire_KO	ENSMUSG00000021027	0.046	A5SS	non-TRA
immature_vs_Aire_KO	ENSMUSG00000026207	0.291	A5SS	non-TRA
immature_vs_Aire_KO	ENSMUSG00000029817	0.084	A5SS	non-TRA
immature_vs_Aire_KO	ENSMUSG00000002459	0.338	A5SS	non-Aire TRA
immature_vs_Aire_KO	ENSMUSG00000034121	0.188	A5SS	non-TRA
immature_vs_Aire_KO	ENSMUSG00000041375	-0.548	A5SS	non-TRA
immature_vs_Aire_KO	ENSMUSG00000040123	0.292	A5SS	non-TRA
immature_vs_Aire_KO	ENSMUSG00000032624	0.037	A5SS	non-TRA
immature_vs_Aire_KO	ENSMUSG00000014592	0.186	A5SS	non-TRA
immature_vs_Aire_KO	ENSMUSG00000057969	-0.194	A5SS	non-TRA
immature_vs_Aire_KO	ENSMUSG00000054256	0.061	A5SS	non-Aire TRA
immature_vs_Aire_KO	ENSMUSG00000032702	-0.338	A5SS	non-TRA
immature_vs_Aire_KO	ENSMUSG00000041272	0.122	A5SS	non-TRA
immature_vs_Aire_KO	ENSMUSG00000026095	0.141	A5SS	non-TRA
immature_vs_Aire_KO	ENSMUSG00000020516	0.08	A5SS	non-TRA
immature_vs_Aire_KO	ENSMUSG00000003269	0.07	A5SS	non-TRA
immature_vs_Aire_KO	ENSMUSG00000000282	0.373	A5SS	non-TRA
immature_vs_Aire_KO	ENSMUSG00000040345	0.765	A5SS	non-TRA
immature_vs_Aire_KO	ENSMUSG00000059208	-0.074	A5SS	non-TRA
immature_vs_Aire_KO	ENSMUSG00000031109	0.132	A5SS	non-TRA
immature_vs_Aire_KO	ENSMUSG00000031295	0.091	A5SS	non-TRA
immature_vs_Aire_KO	ENSMUSG00000021327	0.056	A5SS	non-TRA
immature_vs_Aire_KO	ENSMUSG00000031026	-0.376	A5SS	Aire-regulated TRA
immature_vs_Aire_KO	ENSMUSG00000021559	0.485	A5SS	non-TRA
immature_vs_Aire_KO	ENSMUSG00000094936	0.295	A5SS	non-TRA
immature_vs_Aire_KO	ENSMUSG00000039096	0.167	A5SS	non-TRA
immature_vs_Aire_KO	ENSMUSG00000041341	0.058	A5SS	non-TRA
immature_vs_Aire_KO	ENSMUSG00000024776	0.458	A5SS	non-TRA
immature_vs_Aire_KO	ENSMUSG00000037846	0.623	A5SS	non-Aire TRA
immature_vs_Aire_KO	ENSMUSG00000106918	0.058	A5SS	non-TRA
immature_vs_Aire_KO	ENSMUSG00000024743	-0.155	A5SS	non-TRA
immature_vs_Aire_KO	ENSMUSG00000058656	0.293	A5SS	non-Aire TRA
immature_vs_Aire_KO	ENSMUSG00000025586	0.345	A5SS	non-TRA
immature_vs_Aire_KO	ENSMUSG00000027263	0.23	A5SS	non-TRA
immature_vs_Aire_KO	ENSMUSG00000043411	0.122	A5SS	non-TRA
immature_vs_Aire_KO	ENSMUSG00000041895	-0.052	A5SS	non-TRA
immature_vs_Aire_KO	ENSMUSG00000054720	-0.097	A5SS	non-TRA
immature_vs_Aire_KO	ENSMUSG00000037876	0.209	A5SS	non-TRA
immature_vs_Aire_KO	ENSMUSG00000028293	0.029	A5SS	non-TRA
immature_vs_Aire_KO	ENSMUSG00000029174	0.03	A5SS	non-TRA
immature_vs_Aire_KO	ENSMUSG00000035674	0.014	A5SS	non-TRA
immature_vs_Aire_KO	ENSMUSG00000022992	0.095	A5SS	non-TRA
immature_vs_Aire_KO	ENSMUSG00000022940	0.284	A5SS	non-TRA
immature_vs_Aire_KO	ENSMUSG00000042359	-0.461	A5SS	non-TRA
immature_vs_Aire_KO	ENSMUSG00000039943	0.023	A5SS	non-TRA
immature_vs_Aire_KO	ENSMUSG00000030232	0.012	A5SS	non-TRA
immature_vs_Aire_KO	ENSMUSG00000044339	0.125	A5SS	non-TRA
immature_vs_Aire_KO	ENSMUSG00000039814	0.376	A5SS	non-Aire TRA
immature_vs_Aire_KO	ENSMUSG00000062859	-0.547	A5SS	Aire-regulated TRA
immature_vs_Aire_KO	ENSMUSG00000039765	-0.772	A5SS	non-TRA
immature_vs_Aire_KO	ENSMUSG00000069520	0.118	A5SS	non-TRA
immature_vs_Aire_KO	ENSMUSG00000036352	0.061	A5SS	non-TRA
immature_vs_Aire_KO	ENSMUSG00000054400	0.061	A5SS	non-TRA
immature_vs_Aire_KO	ENSMUSG00000020827	0.145	A5SS	non-TRA
immature_vs_Aire_KO	ENSMUSG00000074794	-0.079	A5SS	non-TRA
immature_vs_Aire_KO	ENSMUSG00000024597	0.033	A5SS	non-TRA
immature_vs_Aire_KO	ENSMUSG00000033021	0.036	A5SS	non-TRA
immature_vs_Aire_KO	ENSMUSG00000009535	0.056	A5SS	non-TRA
immature_vs_Aire_KO	ENSMUSG00000094936	0.054	A5SS	non-TRA
immature_vs_Aire_KO	ENSMUSG00000029798	0.089	A5SS	non-TRA
immature_vs_Aire_KO	ENSMUSG00000026843	0.061	A5SS	non-TRA
immature_vs_Aire_KO	ENSMUSG00000029681	0.019	A5SS	non-TRA
immature_vs_Aire_KO	ENSMUSG00000029054	0.357	A5SS	non-Aire TRA
immature_vs_Aire_KO	ENSMUSG00000039178	0.165	A5SS	non-TRA
immature_vs_Aire_KO	ENSMUSG00000018893	0.5	A5SS	Aire-regulated TRA
immature_vs_Aire_KO	ENSMUSG00000026921	0.5	A5SS	non-TRA
immature_vs_Aire_KO	ENSMUSG00000028960	0.038	A5SS	non-TRA
immature_vs_Aire_KO	ENSMUSG00000018570	0.281	A5SS	non-Aire TRA
immature_vs_Aire_KO	ENSMUSG00000031098	0.332	A5SS	Aire-regulated TRA
immature_vs_Aire_KO	ENSMUSG00000034842	0.043	A5SS	non-TRA
immature_vs_Aire_KO	ENSMUSG00000024422	-0.065	A5SS	non-TRA
immature_vs_Aire_KO	ENSMUSG00000008318	0.208	A5SS	non-TRA
immature_vs_Aire_KO	ENSMUSG00000006958	0.405	A5SS	non-TRA
immature_vs_Aire_KO	ENSMUSG00000015363	0.097	A5SS	non-TRA
immature_vs_Aire_KO	ENSMUSG00000022749	0.044	A5SS	non-TRA
immature_vs_Aire_KO	ENSMUSG00000024644	0.036	A5SS	non-TRA
immature_vs_Aire_KO	ENSMUSG00000021139	0.084	A5SS	non-TRA
immature_vs_Aire_KO	ENSMUSG00000024991	0.016	A5SS	non-TRA
immature_vs_Aire_KO	ENSMUSG00000035954	0.051	A5SS	non-TRA
immature_vs_Aire_KO	ENSMUSG00000041740	0.053	A5SS	non-TRA
immature_vs_Aire_KO	ENSMUSG00000028601	0.221	A5SS	non-TRA
immature_vs_Aire_KO	ENSMUSG00000058486	0.109	A5SS	non-TRA
immature_vs_Aire_KO	ENSMUSG00000037824	0.045	A5SS	non-TRA
immature_vs_Aire_KO	ENSMUSG00000032536	0.032	A5SS	non-TRA
immature_vs_Aire_KO	ENSMUSG00000019849	0.019	A5SS	non-TRA
immature_vs_Aire_KO	ENSMUSG00000025241	-0.042	A5SS	non-TRA
immature_vs_Aire_KO	ENSMUSG00000058881	0.361	A5SS	non-TRA
immature_vs_Aire_KO	ENSMUSG00000062014	0.048	A5SS	non-TRA
immature_vs_Aire_KO	ENSMUSG00000034858	-0.141	A5SS	non-TRA
immature_vs_Aire_KO	ENSMUSG00000040268	0.061	A5SS	non-TRA
immature_vs_Aire_KO	ENSMUSG00000000827	-0.011	A5SS	non-TRA
immature_vs_Aire_KO	ENSMUSG00000032498	0.055	A5SS	non-TRA
immature_vs_Aire_KO	ENSMUSG00000028923	0.042	A5SS	non-TRA
immature_vs_Aire_KO	ENSMUSG00000042439	-0.483	A5SS	non-TRA
immature_vs_Aire_KO	ENSMUSG00000038312	0.04	A5SS	non-TRA
immature_vs_Aire_KO	ENSMUSG00000016624	0.378	A5SS	non-TRA
immature_vs_Aire_KO	ENSMUSG00000019359	0.452	A5SS	non-TRA
immature_vs_Aire_KO	ENSMUSG00000053399	-0.612	A5SS	Aire-regulated TRA
immature_vs_Aire_KO	ENSMUSG00000061950	0.039	A5SS	non-TRA
immature_vs_Aire_KO	ENSMUSG00000021608	0.085	A5SS	non-TRA
immature_vs_Aire_KO	ENSMUSG00000070000	0.239	A5SS	non-TRA
immature_vs_Aire_KO	ENSMUSG00000089917	0.097	A5SS	non-TRA
immature_vs_Aire_KO	ENSMUSG00000038014	0.041	A5SS	non-TRA
immature_vs_Aire_KO	ENSMUSG00000015357	0.026	A5SS	non-TRA
immature_vs_Aire_KO	ENSMUSG00000062906	0.195	A5SS	non-TRA
immature_vs_Aire_KO	ENSMUSG00000021745	0.456	A5SS	non-TRA
immature_vs_Aire_KO	ENSMUSG00000032870	0.013	A5SS	non-TRA
immature_vs_Aire_KO	ENSMUSG00000032609	0.267	A5SS	non-TRA
immature_vs_Aire_KO	ENSMUSG00000025135	-0.124	A5SS	non-TRA
immature_vs_Aire_KO	ENSMUSG00000018861	0.117	A5SS	non-TRA
immature_vs_Aire_KO	ENSMUSG00000036644	0.071	A5SS	non-TRA
immature_vs_Aire_KO	ENSMUSG00000039316	0.34	A5SS	non-TRA
immature_vs_Aire_KO	ENSMUSG00000026034	0.12	A5SS	non-TRA
immature_vs_Aire_KO	ENSMUSG00000039795	0.148	A5SS	non-TRA
immature_vs_Aire_KO	ENSMUSG00000037234	-0.154	A5SS	non-TRA
immature_vs_Aire_KO	ENSMUSG00000036928	0.576	A5SS	non-Aire TRA
immature_vs_Aire_KO	ENSMUSG00000031516	0.045	A5SS	non-TRA
immature_vs_Aire_KO	ENSMUSG00000015143	0.024	A5SS	non-TRA
immature_vs_Aire_KO	ENSMUSG00000027893	0.077	A5SS	non-TRA
immature_vs_Aire_KO	ENSMUSG00000039069	0.078	A5SS	non-TRA
immature_vs_Aire_KO	ENSMUSG00000037110	-0.041	A5SS	non-TRA
immature_vs_Aire_KO	ENSMUSG00000001333	0.023	A5SS	non-Aire TRA
immature_vs_Aire_KO	ENSMUSG00000001440	0.011	A5SS	non-TRA
immature_vs_Aire_KO	ENSMUSG00000038453	-0.909	A5SS	Aire-regulated TRA
immature_vs_Aire_KO	ENSMUSG00000066129	-0.053	A5SS	non-Aire TRA
immature_vs_Aire_KO	ENSMUSG00000019359	0.377	A5SS	non-TRA
immature_vs_Aire_KO	ENSMUSG00000024339	0.018	A5SS	non-TRA
immature_vs_Aire_KO	ENSMUSG00000014852	0.42	A5SS	non-Aire TRA
immature_vs_Aire_KO	ENSMUSG00000024830	0.085	A5SS	non-TRA
immature_vs_Aire_KO	ENSMUSG00000030970	0.053	A5SS	non-TRA
immature_vs_Aire_KO	ENSMUSG00000041238	-0.124	A5SS	non-TRA
immature_vs_Aire_KO	ENSMUSG00000035778	-0.125	A5SS	non-TRA
immature_vs_Aire_KO	ENSMUSG00000035890	0.067	A5SS	non-TRA
immature_vs_Aire_KO	ENSMUSG00000028483	0.343	A5SS	non-TRA
immature_vs_Aire_KO	ENSMUSG00000074141	0.112	A5SS	non-Aire TRA
immature_vs_Aire_KO	ENSMUSG00000031783	0.154	A5SS	non-TRA
immature_vs_Aire_KO	ENSMUSG00000031431	0.492	A5SS	non-TRA
immature_vs_Aire_KO	ENSMUSG00000015970	0.136	A5SS	non-TRA
immature_vs_Aire_KO	ENSMUSG00000061207	0.042	A5SS	non-TRA
immature_vs_Aire_KO	ENSMUSG00000039048	0.197	A5SS	non-TRA
immature_vs_Aire_KO	ENSMUSG00000027010	0.027	A5SS	non-TRA
immature_vs_Aire_KO	ENSMUSG00000039463	0.07	A5SS	non-TRA
immature_vs_Aire_KO	ENSMUSG00000017843	0.232	A5SS	non-TRA
immature_vs_Aire_KO	ENSMUSG00000022861	0.64	A5SS	Aire-regulated TRA
immature_vs_Aire_KO	ENSMUSG00000021476	0.196	A5SS	non-TRA
immature_vs_Aire_KO	ENSMUSG00000055862	0.128	A5SS	non-TRA
immature_vs_Aire_KO	ENSMUSG00000028064	0.395	A5SS	non-TRA
immature_vs_Aire_KO	ENSMUSG00000027263	0.085	A5SS	non-TRA
immature_vs_Aire_KO	ENSMUSG00000062198	0.271	A5SS	non-TRA
immature_vs_Aire_KO	ENSMUSG00000027782	0.261	A5SS	non-TRA
immature_vs_Aire_KO	ENSMUSG00000115798	0.307	A5SS	non-TRA
immature_vs_Aire_KO	ENSMUSG00000002107	0.035	A5SS	non-TRA
immature_vs_Aire_KO	ENSMUSG00000004071	0.197	A5SS	non-TRA
immature_vs_Aire_KO	ENSMUSG00000028782	0.228	A5SS	non-Aire TRA
immature_vs_Aire_KO	ENSMUSG00000020451	0.025	A5SS	non-TRA
immature_vs_Aire_KO	ENSMUSG00000022130	0.09	A5SS	non-TRA
immature_vs_Aire_KO	ENSMUSG00000024163	0.201	A5SS	non-TRA
immature_vs_Aire_KO	ENSMUSG00000028059	0.037	A5SS	non-TRA
immature_vs_Aire_KO	ENSMUSG00000020838	0.657	A5SS	non-TRA
immature_vs_Aire_KO	ENSMUSG00000031974	0.072	A5SS	non-TRA
immature_vs_Aire_KO	ENSMUSG00000030091	0.161	A5SS	non-TRA
immature_vs_Aire_KO	ENSMUSG00000063434	0.658	A5SS	non-Aire TRA
immature_vs_Aire_KO	ENSMUSG00000038127	-0.043	A5SS	non-TRA
immature_vs_Aire_KO	ENSMUSG00000027455	0.019	A5SS	non-TRA
immature_vs_Aire_KO	ENSMUSG00000006498	0.029	A5SS	non-TRA
immature_vs_Aire_KO	ENSMUSG00000041740	0.05	A5SS	non-TRA
immature_vs_Aire_KO	ENSMUSG00000042439	-0.271	A5SS	non-TRA
immature_vs_Aire_KO	ENSMUSG00000017210	0.076	A5SS	non-TRA
immature_vs_Aire_KO	ENSMUSG00000029189	0.419	A5SS	non-TRA
immature_vs_Aire_KO	ENSMUSG00000025155	0.207	A5SS	non-TRA
immature_vs_Aire_KO	ENSMUSG00000029189	-0.326	A5SS	non-TRA
immature_vs_Aire_KO	ENSMUSG00000025816	0.192	A5SS	non-TRA
immature_vs_Aire_KO	ENSMUSG00000043384	-0.256	A5SS	non-TRA
immature_vs_Aire_KO	ENSMUSG00000031808	0.327	A5SS	non-TRA
immature_vs_Aire_KO	ENSMUSG00000033450	-0.174	A5SS	non-TRA
immature_vs_Aire_KO	ENSMUSG00000056476	0.806	A5SS	non-TRA
immature_vs_Aire_KO	ENSMUSG00000006732	0.073	A5SS	non-TRA
immature_vs_Aire_KO	ENSMUSG00000060550	0.048	A5SS	non-TRA
immature_vs_Aire_KO	ENSMUSG00000002107	0.048	A5SS	non-TRA
immature_vs_Aire_KO	ENSMUSG00000026028	0.023	A5SS	non-TRA
immature_vs_Aire_KO	ENSMUSG00000030881	0.102	A5SS	non-TRA
immature_vs_Aire_KO	ENSMUSG00000009647	0.014	A5SS	non-TRA
immature_vs_Aire_KO	ENSMUSG00000074852	0.242	A5SS	non-Aire TRA
immature_vs_Aire_KO	ENSMUSG00000029621	0.03	A5SS	non-TRA
immature_vs_Aire_KO	ENSMUSG00000059363	0.39	A5SS	non-TRA
immature_vs_Aire_KO	ENSMUSG00000024660	0.19	A5SS	non-TRA
immature_vs_Aire_KO	ENSMUSG00000028041	-0.55	A5SS	non-TRA
immature_vs_Aire_KO	ENSMUSG00000020903	0.015	A5SS	non-TRA
immature_vs_Aire_KO	ENSMUSG00000023944	0.02	A5SS	non-TRA
immature_vs_Aire_KO	ENSMUSG00000046169	-0.555	A5SS	non-TRA
immature_vs_Aire_KO	ENSMUSG00000023259	-0.216	A5SS	non-TRA
immature_vs_Aire_KO	ENSMUSG00000029189	0.48	A5SS	non-TRA
immature_vs_Aire_KO	ENSMUSG00000020096	0.323	A5SS	non-Aire TRA
immature_vs_Aire_KO	ENSMUSG00000025486	0.022	A5SS	non-TRA
immature_vs_Aire_KO	ENSMUSG00000025429	0.048	A5SS	non-TRA
immature_vs_Aire_KO	ENSMUSG00000033065	-0.095	A5SS	non-TRA
immature_vs_Aire_KO	ENSMUSG00000028156	0.023	A5SS	non-TRA
immature_vs_Aire_KO	ENSMUSG00000028078	-0.305	A5SS	non-TRA
immature_vs_Aire_KO	ENSMUSG00000050994	0.226	A5SS	non-Aire TRA
immature_vs_Aire_KO	ENSMUSG00000043286	0.5	A5SS	non-Aire TRA
immature_vs_Aire_KO	ENSMUSG00000042660	0.079	A5SS	non-TRA
immature_vs_Aire_KO	ENSMUSG00000029227	0.018	A5SS	non-TRA
immature_vs_Aire_KO	ENSMUSG00000002845	0.036	A5SS	non-TRA
immature_vs_Aire_KO	ENSMUSG00000028792	0.029	A5SS	non-TRA
immature_vs_Aire_KO	ENSMUSG00000020476	0.022	A5SS	non-TRA
immature_vs_Aire_KO	ENSMUSG00000021044	0.044	A5SS	non-TRA
immature_vs_Aire_KO	ENSMUSG00000040312	0.138	A5SS	non-Aire TRA
immature_vs_Aire_KO	ENSMUSG00000028017	-0.492	A5SS	non-Aire TRA
immature_vs_Aire_KO	ENSMUSG00000037652	0.015	A5SS	non-TRA
immature_vs_Aire_KO	ENSMUSG00000029061	0.188	A5SS	non-TRA
immature_vs_Aire_KO	ENSMUSG00000026439	0.101	A5SS	non-TRA
immature_vs_Aire_KO	ENSMUSG00000029559	-0.096	A5SS	non-TRA
immature_vs_Aire_KO	ENSMUSG00000018858	0.046	A5SS	non-TRA
immature_vs_Aire_KO	ENSMUSG00000056492	0.265	A5SS	non-TRA
immature_vs_Aire_KO	ENSMUSG00000021115	0.238	A5SS	non-TRA
immature_vs_Aire_KO	ENSMUSG00000033088	0.05	A5SS	non-TRA
immature_vs_Aire_KO	ENSMUSG00000005442	-0.422	A5SS	non-TRA
immature_vs_Aire_KO	ENSMUSG00000047030	0.113	A5SS	non-TRA
immature_vs_Aire_KO	ENSMUSG00000041594	0.389	A5SS	non-TRA
immature_vs_Aire_KO	ENSMUSG00000068663	0.104	A5SS	non-TRA
immature_vs_Aire_KO	ENSMUSG00000020936	0.015	A5SS	non-TRA
immature_vs_Aire_KO	ENSMUSG00000041309	0.059	A5SS	non-Aire TRA
immature_vs_Aire_KO	ENSMUSG00000003068	0.035	A5SS	non-TRA
immature_vs_Aire_KO	ENSMUSG00000022533	0.036	A5SS	non-TRA
immature_vs_Aire_KO	ENSMUSG00000022453	0.027	A5SS	non-TRA
immature_vs_Aire_KO	ENSMUSG00000026107	0.16	A5SS	non-TRA
immature_vs_Aire_KO	ENSMUSG00000020262	-0.176	A5SS	non-TRA
immature_vs_Aire_KO	ENSMUSG00000020196	0.045	A5SS	non-TRA
immature_vs_Aire_KO	ENSMUSG00000030868	0.06	A5SS	non-TRA
immature_vs_Aire_KO	ENSMUSG00000025575	0.034	A5SS	non-TRA
immature_vs_Aire_KO	ENSMUSG00000015605	-0.034	A5SS	non-TRA
immature_vs_Aire_KO	ENSMUSG00000028572	0.027	A5SS	non-TRA
immature_vs_Aire_KO	ENSMUSG00000028797	0.224	A5SS	non-TRA
immature_vs_Aire_KO	ENSMUSG00000032590	0.05	A5SS	non-TRA
immature_vs_Aire_KO	ENSMUSG00000035958	0.1	A5SS	non-TRA
immature_vs_Aire_KO	ENSMUSG00000041936	-0.042	A5SS	non-TRA
immature_vs_Aire_KO	ENSMUSG00000061028	0.115	A5SS	non-TRA
immature_vs_Aire_KO	ENSMUSG00000026083	0.036	A5SS	non-TRA
immature_vs_Aire_KO	ENSMUSG00000031709	0.048	A5SS	non-TRA
immature_vs_Aire_KO	ENSMUSG00000020063	0.184	A5SS	non-TRA
immature_vs_Aire_KO	ENSMUSG00000067049	0.296	A5SS	non-Aire TRA
immature_vs_Aire_KO	ENSMUSG00000032540	0.072	A5SS	non-TRA
immature_vs_Aire_KO	ENSMUSG00000031808	0.08	A5SS	non-TRA
immature_vs_Aire_KO	ENSMUSG00000030516	0.153	A5SS	non-TRA
immature_vs_Aire_KO	ENSMUSG00000040312	0.067	A5SS	non-Aire TRA
immature_vs_Aire_KO	ENSMUSG00000058638	0.11	A5SS	non-TRA
immature_vs_Aire_KO	ENSMUSG00000000861	0.519	A5SS	non-Aire TRA
immature_vs_Aire_KO	ENSMUSG00000032456	0.382	A5SS	non-TRA
immature_vs_Aire_KO	ENSMUSG00000025586	0.236	A5SS	non-TRA
immature_vs_Aire_KO	ENSMUSG00000026107	0.127	A5SS	non-TRA
immature_vs_Aire_KO	ENSMUSG00000034832	0.181	A5SS	non-TRA
immature_vs_Aire_KO	ENSMUSG00000025785	0.041	A5SS	non-TRA
immature_vs_Aire_KO	ENSMUSG00000021288	0.184	A5SS	non-TRA
immature_vs_Aire_KO	ENSMUSG00000031636	0.015	A5SS	non-TRA
immature_vs_Aire_KO	ENSMUSG00000059586	0.396	A5SS	non-TRA
immature_vs_Aire_KO	ENSMUSG00000030417	0.022	A5SS	non-TRA
immature_vs_Aire_KO	ENSMUSG00000000295	0.071	A5SS	non-TRA
immature_vs_Aire_KO	ENSMUSG00000020521	-0.123	A5SS	non-TRA
immature_vs_Aire_KO	ENSMUSG00000037716	0.184	A5SS	non-Aire TRA
immature_vs_Aire_KO	ENSMUSG00000021803	-0.166	A5SS	non-Aire TRA
immature_vs_Aire_KO	ENSMUSG00000020390	0.048	A5SS	non-TRA
immature_vs_Aire_KO	ENSMUSG00000024937	0.062	A5SS	non-TRA
immature_vs_Aire_KO	ENSMUSG00000031596	-0.202	A5SS	non-TRA
immature_vs_Aire_KO	ENSMUSG00000024423	-0.121	A5SS	non-TRA
immature_vs_Aire_KO	ENSMUSG00000021288	-0.147	A5SS	non-TRA
immature_vs_Aire_KO	ENSMUSG00000024097	0.095	A5SS	non-TRA
immature_vs_Aire_KO	ENSMUSG00000026644	0.377	A5SS	non-Aire TRA
immature_vs_Aire_KO	ENSMUSG00000047284	0.054	A5SS	non-TRA
immature_vs_Aire_KO	ENSMUSG00000026279	0.373	A5SS	non-TRA
immature_vs_Aire_KO	ENSMUSG00000028066	-0.09	A5SS	non-TRA
immature_vs_Aire_KO	ENSMUSG00000032717	0.101	A5SS	non-TRA
immature_vs_Aire_KO	ENSMUSG00000023044	-0.363	A5SS	non-TRA
immature_vs_Aire_KO	ENSMUSG00000028906	0.107	A5SS	non-TRA
immature_vs_Aire_KO	ENSMUSG00000030435	0.033	A5SS	non-TRA
immature_vs_Aire_KO	ENSMUSG00000041852	0.35	A5SS	non-TRA
immature_vs_Aire_KO	ENSMUSG00000028073	0.127	A5SS	non-TRA
immature_vs_Aire_KO	ENSMUSG00000057176	0.149	A5SS	non-Aire TRA
immature_vs_Aire_KO	ENSMUSG00000038777	-0.232	A5SS	non-TRA
immature_vs_Aire_KO	ENSMUSG00000045983	0.106	A5SS	non-TRA
immature_vs_Aire_KO	ENSMUSG00000031723	-0.095	A5SS	non-TRA
immature_vs_Aire_KO	ENSMUSG00000034290	0.046	A5SS	non-TRA
immature_vs_Aire_KO	ENSMUSG00000031521	-0.128	A5SS	non-TRA
immature_vs_Aire_KO	ENSMUSG00000034799	-0.188	A5SS	non-Aire TRA
immature_vs_Aire_KO	ENSMUSG00000026321	0.09	A5SS	non-Aire TRA
immature_vs_Aire_KO	ENSMUSG00000032180	0.089	A5SS	non-TRA
immature_vs_Aire_KO	ENSMUSG00000021288	-0.144	A5SS	non-TRA
immature_vs_Aire_KO	ENSMUSG00000069520	0.062	A5SS	non-TRA
immature_vs_Aire_KO	ENSMUSG00000034799	0.252	A5SS	non-Aire TRA
immature_vs_Aire_KO	ENSMUSG00000005672	0.21	A5SS	non-TRA
immature_vs_Aire_KO	ENSMUSG00000012848	-0.016	A5SS	non-TRA
immature_vs_Aire_KO	ENSMUSG00000106864	0.097	A5SS	non-TRA
immature_vs_Aire_KO	ENSMUSG00000106918	0.055	A5SS	non-TRA
immature_vs_Aire_KO	ENSMUSG00000056962	0.145	A5SS	non-TRA
immature_vs_Aire_KO	ENSMUSG00000022889	0.037	A5SS	non-TRA
immature_vs_Aire_KO	ENSMUSG00000045659	0.063	A5SS	non-TRA
immature_vs_Aire_KO	ENSMUSG00000023118	0.013	A5SS	non-TRA
immature_vs_Aire_KO	ENSMUSG00000031209	0.168	A5SS	non-TRA
immature_vs_Aire_KO	ENSMUSG00000032690	-0.365	A5SS	non-TRA
immature_vs_Aire_KO	ENSMUSG00000026107	0.186	A5SS	non-TRA
immature_vs_Aire_KO	ENSMUSG00000020838	0.238	A5SS	non-TRA
immature_vs_Aire_KO	ENSMUSG00000014852	0.178	A5SS	non-Aire TRA
immature_vs_Aire_KO	ENSMUSG00000021952	0.082	A5SS	non-TRA
immature_vs_Aire_KO	ENSMUSG00000031508	0.218	A5SS	non-TRA
immature_vs_Aire_KO	ENSMUSG00000057346	-0.677	A5SS	Aire-regulated TRA
immature_vs_Aire_KO	ENSMUSG00000018068	0.04	A5SS	non-TRA
immature_vs_Aire_KO	ENSMUSG00000037716	0.163	A5SS	non-Aire TRA
immature_vs_Aire_KO	ENSMUSG00000062859	-0.415	A5SS	Aire-regulated TRA
immature_vs_Aire_KO	ENSMUSG00000023861	0.166	A5SS	non-TRA
immature_vs_Aire_KO	ENSMUSG00000033943	0.055	A5SS	non-TRA
immature_vs_Aire_KO	ENSMUSG00000022858	0.058	A5SS	non-TRA
immature_vs_Aire_KO	ENSMUSG00000049214	0.165	A5SS	non-Aire TRA
immature_vs_Aire_KO	ENSMUSG00000010097	0.11	A5SS	non-TRA
immature_vs_Aire_KO	ENSMUSG00000020284	0.113	A5SS	non-TRA
immature_vs_Aire_KO	ENSMUSG00000021280	0.095	A5SS	non-TRA
immature_vs_Aire_KO	ENSMUSG00000027263	0.119	A5SS	non-TRA
immature_vs_Aire_KO	ENSMUSG00000027881	-0.227	A5SS	non-TRA
immature_vs_Aire_KO	ENSMUSG00000040028	0.033	A5SS	non-TRA
immature_vs_Aire_KO	ENSMUSG00000035597	-0.032	A5SS	non-TRA
immature_vs_Aire_KO	ENSMUSG00000060985	0.41	A5SS	non-Aire TRA
immature_vs_Aire_KO	ENSMUSG00000043535	0.03	A5SS	non-TRA
immature_vs_Aire_KO	ENSMUSG00000040451	0.031	A5SS	non-TRA
immature_vs_Aire_KO	ENSMUSG00000020156	0.018	A5SS	non-TRA
immature_vs_Aire_KO	ENSMUSG00000037300	0.097	A5SS	non-TRA
immature_vs_Aire_KO	ENSMUSG00000079559	0.441	A5SS	non-TRA
immature_vs_Aire_KO	ENSMUSG00000043705	0.196	A5SS	Aire-regulated TRA
immature_vs_Aire_KO	ENSMUSG00000034422	0.033	A5SS	non-TRA
immature_vs_Aire_KO	ENSMUSG00000062859	-0.508	A5SS	Aire-regulated TRA
immature_vs_Aire_KO	ENSMUSG00000029472	0.015	A5SS	non-TRA
immature_vs_Aire_KO	ENSMUSG00000067235	0.222	A5SS	Aire-regulated TRA
immature_vs_Aire_KO	ENSMUSG00000061607	0.662	A5SS	non-TRA
immature_vs_Aire_KO	ENSMUSG00000022359	0.302	A5SS	non-TRA
immature_vs_Aire_KO	ENSMUSG00000022940	0.127	A5SS	non-TRA
immature_vs_Aire_KO	ENSMUSG00000042662	0.214	A5SS	non-Aire TRA
immature_vs_Aire_KO	ENSMUSG00000078664	0.357	A5SS	non-Aire TRA
immature_vs_Aire_KO	ENSMUSG00000073792	-0.236	A5SS	non-TRA
immature_vs_Aire_KO	ENSMUSG00000075415	-0.157	A5SS	non-TRA
immature_vs_Aire_KO	ENSMUSG00000042625	0.103	A5SS	non-TRA
immature_vs_Aire_KO	ENSMUSG00000032127	0.018	A5SS	non-TRA
immature_vs_Aire_KO	ENSMUSG00000032621	0.161	A5SS	non-TRA
immature_vs_Aire_KO	ENSMUSG00000018931	-0.105	A5SS	non-TRA
immature_vs_Aire_KO	ENSMUSG00000052566	0.054	A5SS	non-TRA
immature_vs_Aire_KO	ENSMUSG00000056268	0.042	A5SS	non-TRA
immature_vs_Aire_KO	ENSMUSG00000024163	0.253	A5SS	non-TRA
immature_vs_Aire_KO	ENSMUSG00000063882	-0.011	A5SS	non-TRA
immature_vs_Aire_KO	ENSMUSG00000036748	0.187	A5SS	non-TRA
immature_vs_Aire_KO	ENSMUSG00000038664	0.066	A5SS	non-TRA
immature_vs_Aire_KO	ENSMUSG00000031153	0.141	A5SS	non-TRA
immature_vs_Aire_KO	ENSMUSG00000041375	-0.579	A5SS	non-TRA
immature_vs_Aire_KO	ENSMUSG00000058586	0.017	A5SS	non-TRA
immature_vs_Aire_KO	ENSMUSG00000022961	0.098	A5SS	non-TRA
immature_vs_Aire_KO	ENSMUSG00000020464	0.086	A5SS	non-TRA
immature_vs_Aire_KO	ENSMUSG00000047153	0.046	A5SS	non-TRA
immature_vs_Aire_KO	ENSMUSG00000001288	-0.129	A5SS	non-TRA
immature_vs_Aire_KO	ENSMUSG00000052798	0.053	A5SS	non-TRA
immature_vs_Aire_KO	ENSMUSG00000048677	0.121	A5SS	non-TRA
immature_vs_Aire_KO	ENSMUSG00000031644	0.023	A5SS	non-TRA
immature_vs_Aire_KO	ENSMUSG00000048905	0.138	A5SS	non-Aire TRA
immature_vs_Aire_KO	ENSMUSG00000052798	0.051	A5SS	non-TRA
immature_vs_Aire_KO	ENSMUSG00000044783	0.051	A5SS	non-TRA
immature_vs_Aire_KO	ENSMUSG00000027804	0.056	A5SS	non-TRA
immature_vs_Aire_KO	ENSMUSG00000054720	-0.076	A5SS	non-TRA
immature_vs_Aire_KO	ENSMUSG00000040123	0.258	A5SS	non-TRA
immature_vs_Aire_KO	ENSMUSG00000052560	0.117	A5SS	non-TRA
immature_vs_Aire_KO	ENSMUSG00000021236	-0.436	A5SS	non-TRA
immature_vs_Aire_KO	ENSMUSG00000031358	-0.082	A5SS	non-TRA
immature_vs_Aire_KO	ENSMUSG00000026960	0.052	A5SS	non-TRA
immature_vs_Aire_KO	ENSMUSG00000030830	-0.4	A5SS	non-TRA
immature_vs_Aire_KO	ENSMUSG00000032536	0.235	A5SS	non-TRA
immature_vs_Aire_KO	ENSMUSG00000054199	0.35	A5SS	non-TRA
immature_vs_Aire_KO	ENSMUSG00000029673	0.332	A5SS	non-TRA
immature_vs_Aire_KO	ENSMUSG00000058818	-0.465	A5SS	non-TRA
immature_vs_Aire_KO	ENSMUSG00000018919	-0.336	A5SS	non-Aire TRA
immature_vs_Aire_KO	ENSMUSG00000031782	0.063	A5SS	non-TRA
immature_vs_Aire_KO	ENSMUSG00000030322	0.265	A5SS	non-TRA
immature_vs_Aire_KO	ENSMUSG00000030868	0.056	A5SS	non-TRA
immature_vs_Aire_KO	ENSMUSG00000039512	-0.127	A5SS	non-TRA
immature_vs_Aire_KO	ENSMUSG00000019996	0.283	A5SS	non-TRA
immature_vs_Aire_KO	ENSMUSG00000024180	0.113	A5SS	non-TRA
immature_vs_Aire_KO	ENSMUSG00000068917	0.064	A5SS	non-TRA
immature_vs_Aire_KO	ENSMUSG00000049515	0.167	A5SS	non-Aire TRA
immature_vs_Aire_KO	ENSMUSG00000031099	0.163	A5SS	Aire-regulated TRA
immature_vs_Aire_KO	ENSMUSG00000001998	0.057	A5SS	non-TRA
immature_vs_Aire_KO	ENSMUSG00000034063	0.159	A5SS	non-Aire TRA
immature_vs_Aire_KO	ENSMUSG00000039108	0.03	A5SS	non-TRA
immature_vs_Aire_KO	ENSMUSG00000031143	-0.128	A5SS	non-TRA
immature_vs_Aire_KO	ENSMUSG00000031295	0.075	A5SS	non-TRA
immature_vs_Aire_KO	ENSMUSG00000029687	0.207	A5SS	non-TRA
immature_vs_Aire_KO	ENSMUSG00000022185	0.052	A5SS	non-TRA
immature_vs_Aire_KO	ENSMUSG00000040813	0.457	A5SS	non-TRA
immature_vs_Aire_KO	ENSMUSG00000078664	0.4	A5SS	non-Aire TRA
immature_vs_Aire_KO	ENSMUSG00000034354	0.087	A5SS	non-TRA
immature_vs_Aire_KO	ENSMUSG00000028636	0.071	A5SS	non-TRA
immature_vs_Aire_KO	ENSMUSG00000072946	0.021	A5SS	non-TRA
immature_vs_Aire_KO	ENSMUSG00000001289	0.031	A5SS	non-TRA
immature_vs_Aire_KO	ENSMUSG00000028811	0.022	A5SS	non-TRA
immature_vs_Aire_KO	ENSMUSG00000033610	0.051	A5SS	non-TRA
immature_vs_Aire_KO	ENSMUSG00000003623	0.015	A5SS	non-TRA
immature_vs_Aire_KO	ENSMUSG00000024826	0.034	A5SS	non-TRA
immature_vs_Aire_KO	ENSMUSG00000002797	-0.161	A5SS	non-TRA
immature_vs_Aire_KO	ENSMUSG00000032264	0.037	A5SS	non-TRA
immature_vs_Aire_KO	ENSMUSG00000056770	0.015	A5SS	non-TRA
immature_vs_Aire_KO	ENSMUSG00000026987	0.152	A5SS	non-TRA
immature_vs_Aire_KO	ENSMUSG00000023977	0.048	A5SS	non-TRA
immature_vs_Aire_KO	ENSMUSG00000000902	-0.124	A5SS	non-TRA
immature_vs_Aire_KO	ENSMUSG00000040247	0.161	A5SS	non-Aire TRA
immature_vs_Aire_KO	ENSMUSG00000037548	0.065	A5SS	non-Aire TRA
immature_vs_Aire_KO	ENSMUSG00000050994	0.196	A5SS	non-Aire TRA
immature_vs_Aire_KO	ENSMUSG00000021432	0.067	A5SS	non-TRA
immature_vs_Aire_KO	ENSMUSG00000026743	0.169	A5SS	non-TRA
immature_vs_Aire_KO	ENSMUSG00000035513	0.263	A5SS	non-TRA
immature_vs_Aire_KO	ENSMUSG00000029599	0.029	A5SS	non-TRA
immature_vs_Aire_KO	ENSMUSG00000022538	-0.286	A5SS	non-TRA
immature_vs_Aire_KO	ENSMUSG00000021901	0.339	A5SS	non-TRA
immature_vs_Aire_KO	ENSMUSG00000029165	0.088	A5SS	non-TRA
immature_vs_Aire_KO	ENSMUSG00000033417	0.013	A5SS	non-TRA
immature_vs_Aire_KO	ENSMUSG00000040111	0.032	A5SS	non-TRA
immature_vs_Aire_KO	ENSMUSG00000032067	0.062	A5SS	non-TRA
immature_vs_Aire_KO	ENSMUSG00000039671	-0.248	A5SS	non-TRA
immature_vs_Aire_KO	ENSMUSG00000039768	0.048	A5SS	non-TRA
immature_vs_Aire_KO	ENSMUSG00000021271	0.174	A5SS	non-TRA
immature_vs_Aire_KO	ENSMUSG00000031556	0.012	A5SS	non-TRA
immature_vs_Aire_KO	ENSMUSG00000041895	-0.042	A5SS	non-TRA
immature_vs_Aire_KO	ENSMUSG00000031357	-0.217	A5SS	non-TRA
immature_vs_Aire_KO	ENSMUSG00000020838	0.424	A5SS	non-TRA
immature_vs_Aire_KO	ENSMUSG00000028910	0.058	A5SS	non-TRA
immature_vs_Aire_KO	ENSMUSG00000042401	-0.132	A5SS	non-Aire TRA
immature_vs_Aire_KO	ENSMUSG00000021288	0.203	A5SS	non-TRA
immature_vs_Aire_KO	ENSMUSG00000021238	0.373	A5SS	non-TRA
immature_vs_Aire_KO	ENSMUSG00000026070	0.06	A5SS	non-Aire TRA
immature_vs_Aire_KO	ENSMUSG00000022992	0.203	A5SS	non-TRA
immature_vs_Aire_KO	ENSMUSG00000030868	0.296	A5SS	non-TRA
immature_vs_Aire_KO	ENSMUSG00000040428	0.097	A5SS	non-TRA
immature_vs_Aire_KO	ENSMUSG00000063354	0.131	A5SS	non-TRA
immature_vs_Aire_KO	ENSMUSG00000038828	0.085	A5SS	non-TRA
immature_vs_Aire_KO	ENSMUSG00000030538	0.011	A5SS	non-TRA
immature_vs_Aire_KO	ENSMUSG00000020513	0.05	A5SS	non-TRA
immature_vs_Aire_KO	ENSMUSG00000031557	0.2	A5SS	non-TRA
immature_vs_Aire_KO	ENSMUSG00000037548	0.028	A5SS	non-Aire TRA
immature_vs_Aire_KO	ENSMUSG00000029510	0.11	A5SS	non-Aire TRA
immature_vs_Aire_KO	ENSMUSG00000035696	0.42	A5SS	non-TRA
immature_vs_Aire_KO	ENSMUSG00000020744	0.038	A5SS	non-TRA
immature_vs_Aire_KO	ENSMUSG00000021288	0.156	A5SS	non-TRA
immature_vs_Aire_KO	ENSMUSG00000031842	0.165	A5SS	non-TRA
immature_vs_Aire_KO	ENSMUSG00000031805	0.183	A5SS	non-TRA
immature_vs_Aire_KO	ENSMUSG00000027660	0.134	A5SS	non-TRA
immature_vs_Aire_KO	ENSMUSG00000057835	-0.135	A5SS	non-TRA
immature_vs_Aire_KO	ENSMUSG00000028869	0.043	A5SS	non-TRA
immature_vs_Aire_KO	ENSMUSG00000030872	0.01	A5SS	non-TRA
immature_vs_Aire_KO	ENSMUSG00000038708	0.027	A5SS	non-TRA
immature_vs_Aire_KO	ENSMUSG00000005417	-0.087	A5SS	non-TRA
immature_vs_Aire_KO	ENSMUSG00000039354	0.031	A5SS	non-TRA
immature_vs_Aire_KO	ENSMUSG00000002728	0.04	A5SS	non-TRA
immature_vs_Aire_KO	ENSMUSG00000035152	0.335	A5SS	non-TRA
immature_vs_Aire_KO	ENSMUSG00000009741	-0.065	A5SS	non-TRA
immature_vs_Aire_KO	ENSMUSG00000031808	-0.133	A5SS	non-TRA
immature_vs_Aire_KO	ENSMUSG00000026281	0.088	A5SS	non-TRA
immature_vs_Aire_KO	ENSMUSG00000054702	0.123	A5SS	non-TRA
immature_vs_Aire_KO	ENSMUSG00000023572	0.045	A5SS	non-TRA
immature_vs_Aire_KO	ENSMUSG00000019794	0.025	A5SS	non-TRA
immature_vs_Aire_KO	ENSMUSG00000073096	0.349	A5SS	non-TRA
immature_vs_Aire_KO	ENSMUSG00000021301	0.126	A5SS	non-Aire TRA
immature_vs_Aire_KO	ENSMUSG00000029370	-0.125	A5SS	non-Aire TRA
immature_vs_Aire_KO	ENSMUSG00000029101	-0.181	A5SS	non-TRA
immature_vs_Aire_KO	ENSMUSG00000031167	-0.095	A5SS	non-TRA
immature_vs_Aire_KO	ENSMUSG00000043541	0.42	A5SS	non-Aire TRA
immature_vs_Aire_KO	ENSMUSG00000030231	0.056	A5SS	non-TRA
immature_vs_Aire_KO	ENSMUSG00000023026	0.022	A5SS	non-TRA
immature_vs_Aire_KO	ENSMUSG00000029603	-0.163	A5SS	non-TRA
immature_vs_Aire_KO	ENSMUSG00000001998	0.347	A5SS	non-TRA
immature_vs_Aire_KO	ENSMUSG00000023079	-0.084	A5SS	non-TRA
immature_vs_Aire_KO	ENSMUSG00000036748	0.263	A5SS	non-TRA
immature_vs_Aire_KO	ENSMUSG00000030733	-0.118	A5SS	non-TRA
immature_vs_Aire_KO	ENSMUSG00000025576	0.425	A5SS	Aire-regulated TRA
immature_vs_Aire_KO	ENSMUSG00000027007	0.026	A5SS	non-TRA
immature_vs_Aire_KO	ENSMUSG00000033707	0.163	A5SS	non-TRA
immature_vs_Aire_KO	ENSMUSG00000038485	0.469	A5SS	non-TRA
immature_vs_Aire_KO	ENSMUSG00000020669	0.044	A5SS	non-TRA
immature_vs_Aire_KO	ENSMUSG00000039178	0.018	A5SS	non-TRA
immature_vs_Aire_KO	ENSMUSG00000060073	0.014	A5SS	non-TRA
immature_vs_Aire_KO	ENSMUSG00000007610	0.244	A5SS	non-TRA
immature_vs_Aire_KO	ENSMUSG00000034800	0.272	A5SS	non-TRA
immature_vs_Aire_KO	ENSMUSG00000040940	0.139	A5SS	non-TRA
immature_vs_Aire_KO	ENSMUSG00000021262	0.155	A5SS	non-TRA
immature_vs_Aire_KO	ENSMUSG00000036473	0.155	A5SS	non-TRA
immature_vs_Aire_KO	ENSMUSG00000034908	-0.081	A5SS	non-TRA
immature_vs_Aire_KO	ENSMUSG00000039178	0.021	A5SS	non-TRA
immature_vs_Aire_KO	ENSMUSG00000032702	-0.448	A5SS	non-TRA
immature_vs_Aire_KO	ENSMUSG00000042569	0.042	A5SS	non-TRA
immature_vs_Aire_KO	ENSMUSG00000033423	0.194	A5SS	non-TRA
immature_vs_Aire_KO	ENSMUSG00000035310	0.079	A5SS	non-TRA
immature_vs_Aire_KO	ENSMUSG00000032536	0.224	A5SS	non-TRA
immature_vs_Aire_KO	ENSMUSG00000041073	0.314	A5SS	Aire-regulated TRA
immature_vs_Aire_KO	ENSMUSG00000005774	-0.099	A5SS	non-TRA
immature_vs_Aire_KO	ENSMUSG00000071653	0.012	A5SS	non-TRA
immature_vs_Aire_KO	ENSMUSG00000031805	-0.117	A5SS	non-TRA
immature_vs_Aire_KO	ENSMUSG00000059586	0.368	A5SS	non-TRA
immature_vs_Aire_KO	ENSMUSG00000024055	0.048	A5SS	non-TRA
immature_vs_Aire_KO	ENSMUSG00000033857	0.054	A5SS	non-TRA
immature_vs_Aire_KO	ENSMUSG00000024737	0.127	A5SS	non-TRA
immature_vs_Aire_KO	ENSMUSG00000030811	0.059	A5SS	non-TRA
immature_vs_Aire_KO	ENSMUSG00000036948	-0.203	A5SS	non-TRA
immature_vs_Aire_KO	ENSMUSG00000050390	0.073	A5SS	non-TRA
immature_vs_Aire_KO	ENSMUSG00000034684	0.029	A5SS	non-TRA
immature_vs_Aire_KO	ENSMUSG00000024622	0.058	A5SS	non-TRA
immature_vs_Aire_KO	ENSMUSG00000037474	-0.127	A5SS	non-Aire TRA
immature_vs_Aire_KO	ENSMUSG00000030516	0.133	A5SS	non-TRA
immature_vs_Aire_KO	ENSMUSG00000022394	0.061	A5SS	non-TRA
immature_vs_Aire_KO	ENSMUSG00000031877	0.012	A5SS	non-TRA
immature_vs_Aire_KO	ENSMUSG00000035829	0.219	A5SS	non-TRA
immature_vs_Aire_KO	ENSMUSG00000031337	0.014	A5SS	non-TRA
immature_vs_Aire_KO	ENSMUSG00000023206	0.03	A5SS	non-TRA
immature_vs_Aire_KO	ENSMUSG00000025982	0.049	A5SS	non-TRA
immature_vs_Aire_KO	ENSMUSG00000035376	0.008	A5SS	non-TRA
immature_vs_Aire_KO	ENSMUSG00000032702	-0.135	A5SS	non-TRA
immature_vs_Aire_KO	ENSMUSG00000007613	0.066	A5SS	non-TRA
immature_vs_Aire_KO	ENSMUSG00000024271	0.019	A5SS	non-TRA
immature_vs_Aire_KO	ENSMUSG00000003923	0.02	A5SS	non-TRA
immature_vs_Aire_KO	ENSMUSG00000025956	0.493	A5SS	non-TRA
immature_vs_Aire_KO	ENSMUSG00000040459	0.099	A5SS	non-TRA
immature_vs_Aire_KO	ENSMUSG00000056692	0.095	A5SS	non-TRA
immature_vs_Aire_KO	ENSMUSG00000031543	-0.181	A5SS	non-TRA
immature_vs_Aire_KO	ENSMUSG00000028961	0.035	A5SS	non-TRA
immature_vs_Aire_KO	ENSMUSG00000040459	0.098	A5SS	non-TRA
immature_vs_Aire_KO	ENSMUSG00000079038	-0.23	A5SS	non-Aire TRA
immature_vs_Aire_KO	ENSMUSG00000030619	0.088	A5SS	non-TRA
immature_vs_Aire_KO	ENSMUSG00000015016	0.043	A5SS	non-TRA
immature_vs_Aire_KO	ENSMUSG00000096370	0.054	A5SS	non-TRA
immature_vs_Aire_KO	ENSMUSG00000042208	0.209	A5SS	non-TRA
immature_vs_Aire_KO	ENSMUSG00000048537	-0.102	A5SS	non-TRA
immature_vs_Aire_KO	ENSMUSG00000020328	0.066	A5SS	non-TRA
immature_vs_Aire_KO	ENSMUSG00000009555	0.25	A5SS	non-TRA
immature_vs_Aire_KO	ENSMUSG00000070643	0.134	A5SS	non-TRA
immature_vs_Aire_KO	ENSMUSG00000009292	0.082	A5SS	non-Aire TRA
immature_vs_Aire_KO	ENSMUSG00000001844	0.093	A5SS	non-TRA
immature_vs_Aire_KO	ENSMUSG00000022906	0.303	A5SS	non-TRA
immature_vs_Aire_KO	ENSMUSG00000006335	0.067	A5SS	non-TRA
immature_vs_Aire_KO	ENSMUSG00000030091	0.047	A5SS	non-TRA
immature_vs_Aire_KO	ENSMUSG00000038521	0.057	A5SS	non-TRA
immature_vs_Aire_KO	ENSMUSG00000020109	0.029	A5SS	non-TRA
immature_vs_Aire_KO	ENSMUSG00000024949	-0.089	A5SS	non-TRA
immature_vs_Aire_KO	ENSMUSG00000034681	0.072	A5SS	non-TRA
immature_vs_Aire_KO	ENSMUSG00000032489	0.253	A5SS	non-Aire TRA
immature_vs_Aire_KO	ENSMUSG00000068015	0.102	A5SS	non-TRA
immature_vs_Aire_KO	ENSMUSG00000020527	0.07	A5SS	non-TRA
immature_vs_Aire_KO	ENSMUSG00000054008	0.034	A5SS	non-TRA
immature_vs_Aire_KO	ENSMUSG00000024073	0.1	A5SS	non-TRA
immature_vs_Aire_KO	ENSMUSG00000024975	0.016	A5SS	non-TRA
immature_vs_Aire_KO	ENSMUSG00000021483	0.08	A5SS	non-TRA
immature_vs_Aire_KO	ENSMUSG00000060450	0.179	A5SS	non-TRA
immature_vs_Aire_KO	ENSMUSG00000039275	0.051	A5SS	non-TRA
immature_vs_Aire_KO	ENSMUSG00000034911	0.397	A5SS	non-TRA
immature_vs_Aire_KO	ENSMUSG00000060261	-0.012	A5SS	non-TRA
immature_vs_Aire_KO	ENSMUSG00000023991	0.281	A5SS	non-TRA
immature_vs_Aire_KO	ENSMUSG00000024457	-0.166	A5SS	non-TRA
immature_vs_Aire_KO	ENSMUSG00000040483	0.136	A5SS	non-TRA
immature_vs_Aire_KO	ENSMUSG00000025082	0.138	A5SS	Aire-regulated TRA
immature_vs_Aire_KO	ENSMUSG00000026005	-0.312	A5SS	non-TRA
immature_vs_Aire_KO	ENSMUSG00000106247	0.319	A5SS	non-TRA
immature_vs_Aire_KO	ENSMUSG00000005823	0.033	A5SS	non-TRA
immature_vs_Aire_KO	ENSMUSG00000042401	-0.095	A5SS	non-Aire TRA
immature_vs_Aire_KO	ENSMUSG00000043079	-0.157	A5SS	non-TRA
immature_vs_Aire_KO	ENSMUSG00000030852	0.051	A5SS	non-TRA
immature_vs_Aire_KO	ENSMUSG00000068921	0.165	A5SS	non-TRA
immature_vs_Aire_KO	ENSMUSG00000037940	-0.103	A5SS	non-TRA
immature_vs_Aire_KO	ENSMUSG00000034156	0.206	A5SS	non-Aire TRA
immature_vs_Aire_KO	ENSMUSG00000063698	0.083	A5SS	non-TRA
immature_vs_Aire_KO	ENSMUSG00000023206	0.06	A5SS	non-TRA
immature_vs_Aire_KO	ENSMUSG00000020792	0.03	A5SS	non-TRA
immature_vs_Aire_KO	ENSMUSG00000025393	-0.176	A5SS	non-TRA
immature_vs_Aire_KO	ENSMUSG00000003134	0.049	A5SS	non-TRA
immature_vs_Aire_KO	ENSMUSG00000029922	0.246	A5SS	non-TRA
immature_vs_Aire_KO	ENSMUSG00000033392	0.035	A5SS	non-TRA
immature_vs_Aire_KO	ENSMUSG00000021711	0.033	A5SS	non-TRA
immature_vs_Aire_KO	ENSMUSG00000021974	0.272	A5SS	non-Aire TRA
immature_vs_Aire_KO	ENSMUSG00000064090	-0.059	A5SS	non-TRA
immature_vs_Aire_KO	ENSMUSG00000067642	0.424	A5SS	Aire-regulated TRA
immature_vs_Aire_KO	ENSMUSG00000026856	0.365	A5SS	non-TRA
immature_vs_Aire_KO	ENSMUSG00000039086	0.08	A5SS	non-TRA
immature_vs_Aire_KO	ENSMUSG00000029055	0.47	A5SS	non-TRA
immature_vs_Aire_KO	ENSMUSG00000057246	-0.383	A5SS	non-Aire TRA
immature_vs_Aire_KO	ENSMUSG00000025403	-0.116	A5SS	non-TRA
immature_vs_Aire_KO	ENSMUSG00000057541	-0.082	A5SS	non-TRA
immature_vs_Aire_KO	ENSMUSG00000054252	0.142	A5SS	non-TRA
immature_vs_Aire_KO	ENSMUSG00000020954	0.008	A5SS	non-TRA
immature_vs_Aire_KO	ENSMUSG00000069255	0.282	A5SS	non-TRA
immature_vs_Aire_KO	ENSMUSG00000030035	0.044	A5SS	non-TRA
immature_vs_Aire_KO	ENSMUSG00000026005	-0.086	A5SS	non-TRA
immature_vs_Aire_KO	ENSMUSG00000032357	0.151	A5SS	non-Aire TRA
immature_vs_Aire_KO	ENSMUSG00000015968	0.375	A5SS	non-TRA
immature_vs_Aire_KO	ENSMUSG00000031808	-0.208	A5SS	non-TRA
immature_vs_Aire_KO	ENSMUSG00000022965	0.012	A5SS	non-TRA
immature_vs_Aire_KO	ENSMUSG00000036151	0.269	A5SS	non-Aire TRA
immature_vs_Aire_KO	ENSMUSG00000036561	0.079	A5SS	non-TRA
immature_vs_Aire_KO	ENSMUSG00000004462	0.208	A5SS	non-TRA
immature_vs_Aire_KO	ENSMUSG00000049643	0.17	A5SS	non-TRA
immature_vs_Aire_KO	ENSMUSG00000036620	0.089	A5SS	non-TRA
immature_vs_Aire_KO	ENSMUSG00000060600	-0.098	A5SS	non-TRA
immature_vs_Aire_KO	ENSMUSG00000016757	0.024	A5SS	non-TRA
immature_vs_Aire_KO	ENSMUSG00000063506	-0.115	A5SS	non-TRA
immature_vs_Aire_KO	ENSMUSG00000006344	0.252	A5SS	non-TRA
immature_vs_Aire_KO	ENSMUSG00000040505	-0.113	A5SS	non-Aire TRA
immature_vs_Aire_KO	ENSMUSG00000029922	0.163	A5SS	non-TRA
immature_vs_Aire_KO	ENSMUSG00000071226	-0.308	A5SS	non-TRA
immature_vs_Aire_KO	ENSMUSG00000026970	0.225	A5SS	non-TRA
immature_vs_Aire_KO	ENSMUSG00000004677	0.177	A5SS	non-TRA
immature_vs_Aire_KO	ENSMUSG00000021098	-0.402	A5SS	non-Aire TRA
immature_vs_Aire_KO	ENSMUSG00000021666	0.224	A5SS	non-TRA
immature_vs_Aire_KO	ENSMUSG00000056268	0.098	A5SS	non-TRA
immature_vs_Aire_KO	ENSMUSG00000041119	0.131	A5SS	non-TRA
immature_vs_Aire_KO	ENSMUSG00000018574	0.016	A5SS	non-TRA
immature_vs_Aire_KO	ENSMUSG00000036805	-0.455	A5SS	Aire-regulated TRA
immature_vs_Aire_KO	ENSMUSG00000031445	-0.088	A5SS	non-Aire TRA
immature_vs_Aire_KO	ENSMUSG00000062157	-0.121	A5SS	non-TRA
immature_vs_Aire_KO	ENSMUSG00000035674	0.138	A5SS	non-TRA
immature_vs_Aire_KO	ENSMUSG00000037805	0.024	A5SS	non-TRA
immature_vs_Aire_KO	ENSMUSG00000023147	0.054	A5SS	non-TRA
immature_vs_Aire_KO	ENSMUSG00000048495	0.401	A5SS	non-TRA
immature_vs_Aire_KO	ENSMUSG00000021376	0.298	A5SS	non-TRA
immature_vs_Aire_KO	ENSMUSG00000055065	0.03	A5SS	non-TRA
immature_vs_Aire_KO	ENSMUSG00000033713	-0.107	A5SS	non-TRA
immature_vs_Aire_KO	ENSMUSG00000014725	0.087	A5SS	Aire-regulated TRA
immature_vs_Aire_KO	ENSMUSG00000015165	0.044	A5SS	non-TRA
immature_vs_Aire_KO	ENSMUSG00000036570	-0.417	A5SS	non-TRA
immature_vs_Aire_KO	ENSMUSG00000031808	-0.085	A5SS	non-TRA
immature_vs_Aire_KO	ENSMUSG00000080268	0.068	A5SS	non-TRA
immature_vs_Aire_KO	ENSMUSG00000025470	0.067	A5SS	non-TRA
immature_vs_Aire_KO	ENSMUSG00000087403	0.168	A5SS	non-TRA
immature_vs_Aire_KO	ENSMUSG00000036309	0.009	A5SS	non-TRA
immature_vs_Aire_KO	ENSMUSG00000021068	0.058	A5SS	non-TRA
immature_vs_Aire_KO	ENSMUSG00000030124	0.095	A5SS	non-TRA
immature_vs_Aire_KO	ENSMUSG00000109446	0.133	A5SS	non-Aire TRA
immature_vs_Aire_KO	ENSMUSG00000044313	0.09	A5SS	Aire-regulated TRA
immature_vs_Aire_KO	ENSMUSG00000043535	0.023	A5SS	non-TRA
immature_vs_Aire_KO	ENSMUSG00000024740	0.008	A5SS	non-TRA
immature_vs_Aire_KO	ENSMUSG00000018809	0.101	A5SS	non-TRA
immature_vs_Aire_KO	ENSMUSG00000002847	0.109	A5SS	non-TRA
immature_vs_Aire_KO	ENSMUSG00000079014	0.079	A5SS	non-Aire TRA
immature_vs_Aire_KO	ENSMUSG00000025138	0.213	A5SS	non-TRA
immature_vs_Aire_KO	ENSMUSG00000033102	0.029	A5SS	non-TRA
immature_vs_Aire_KO	ENSMUSG00000029207	0.061	A5SS	non-TRA
immature_vs_Aire_KO	ENSMUSG00000047696	-0.149	A5SS	non-Aire TRA
immature_vs_Aire_KO	ENSMUSG00000049755	0.166	A5SS	non-TRA
immature_vs_Aire_KO	ENSMUSG00000035278	0.036	A5SS	non-TRA
immature_vs_Aire_KO	ENSMUSG00000022747	-0.214	A5SS	non-TRA
immature_vs_Aire_KO	ENSMUSG00000035325	0.115	A5SS	non-TRA
immature_vs_Aire_KO	ENSMUSG00000020778	0.27	A5SS	non-TRA
immature_vs_Aire_KO	ENSMUSG00000026349	0.068	A5SS	non-TRA
immature_vs_Aire_KO	ENSMUSG00000034312	0.465	A5SS	non-TRA
immature_vs_Aire_KO	ENSMUSG00000031328	0.012	A5SS	non-TRA
immature_vs_Aire_KO	ENSMUSG00000029848	0.397	A5SS	non-Aire TRA
immature_vs_Aire_KO	ENSMUSG00000026492	0.284	A5SS	non-TRA
immature_vs_Aire_KO	ENSMUSG00000004462	0.182	A5SS	non-TRA
immature_vs_Aire_KO	ENSMUSG00000029134	0.129	A5SS	non-Aire TRA
immature_vs_Aire_KO	ENSMUSG00000032180	0.065	A5SS	non-TRA
immature_vs_Aire_KO	ENSMUSG00000036995	-0.101	A5SS	non-TRA
immature_vs_Aire_KO	ENSMUSG00000071335	-0.249	A5SS	non-TRA
immature_vs_Aire_KO	ENSMUSG00000015647	-0.056	A5SS	non-TRA
immature_vs_Aire_KO	ENSMUSG00000087385	0.329	A5SS	non-TRA
immature_vs_Aire_KO	ENSMUSG00000038762	0.022	A5SS	non-TRA
immature_vs_Aire_KO	ENSMUSG00000005823	0.024	A5SS	non-TRA
immature_vs_Aire_KO	ENSMUSG00000029335	0.041	A5SS	non-Aire TRA
immature_vs_Aire_KO	ENSMUSG00000026289	-0.057	A5SS	non-TRA
immature_vs_Aire_KO	ENSMUSG00000054199	0.342	A5SS	non-TRA
immature_vs_Aire_KO	ENSMUSG00000014856	0.097	A5SS	non-TRA
immature_vs_Aire_KO	ENSMUSG00000033955	-0.106	A5SS	non-TRA
immature_vs_Aire_KO	ENSMUSG00000028107	-0.042	A5SS	non-TRA
immature_vs_Aire_KO	ENSMUSG00000053964	0.046	A5SS	non-TRA
immature_vs_Aire_KO	ENSMUSG00000022747	-0.249	A5SS	non-TRA
immature_vs_Aire_KO	ENSMUSG00000024082	0.245	A5SS	non-TRA
immature_vs_Aire_KO	ENSMUSG00000037617	0.041	A5SS	non-TRA
immature_vs_Aire_KO	ENSMUSG00000033526	0.434	A5SS	non-TRA
immature_vs_Aire_KO	ENSMUSG00000020061	-0.111	A5SS	non-TRA
immature_vs_Aire_KO	ENSMUSG00000071715	0.037	A5SS	non-TRA
immature_vs_Aire_KO	ENSMUSG00000032097	-0.181	A5SS	non-TRA
immature_vs_Aire_KO	ENSMUSG00000032089	0.194	A5SS	non-TRA
immature_vs_Aire_KO	ENSMUSG00000044037	0.254	A5SS	non-TRA
immature_vs_Aire_KO	ENSMUSG00000032534	-0.05	A5SS	non-TRA
immature_vs_Aire_KO	ENSMUSG00000074796	0.043	A5SS	non-Aire TRA
immature_vs_Aire_KO	ENSMUSG00000024218	0.252	A5SS	non-TRA
immature_vs_Aire_KO	ENSMUSG00000024622	-0.15	A5SS	non-TRA
immature_vs_Aire_KO	ENSMUSG00000068580	-0.157	A5SS	non-TRA
immature_vs_Aire_KO	ENSMUSG00000094936	0.047	A5SS	non-TRA
immature_vs_Aire_KO	ENSMUSG00000002257	0.016	A5SS	non-TRA
immature_vs_Aire_KO	ENSMUSG00000027635	0.2	A5SS	non-TRA
immature_vs_Aire_KO	ENSMUSG00000027879	0.024	A5SS	non-TRA
immature_vs_Aire_KO	ENSMUSG00000035139	0.086	A5SS	non-TRA
immature_vs_Aire_KO	ENSMUSG00000015476	0.811	A5SS	non-Aire TRA
immature_vs_Aire_KO	ENSMUSG00000015937	0.009	A5SS	non-TRA
immature_vs_Aire_KO	ENSMUSG00000044950	0.568	A5SS	non-TRA
immature_vs_Aire_KO	ENSMUSG00000073096	-0.179	A5SS	non-TRA
immature_vs_Aire_KO	ENSMUSG00000000976	0.071	A5SS	non-TRA
immature_vs_Aire_KO	ENSMUSG00000015536	0.051	A5SS	non-TRA
immature_vs_Aire_KO	ENSMUSG00000000631	-0.116	A5SS	non-TRA
immature_vs_Aire_KO	ENSMUSG00000044320	0.325	A5SS	non-Aire TRA
immature_vs_Aire_KO	ENSMUSG00000057858	0.136	A5SS	non-TRA
immature_vs_Aire_KO	ENSMUSG00000040562	0.052	A5SS	non-TRA
immature_vs_Aire_KO	ENSMUSG00000025466	0.056	A5SS	non-TRA
immature_vs_Aire_KO	ENSMUSG00000021432	0.063	A5SS	non-TRA
immature_vs_Aire_KO	ENSMUSG00000040464	0.106	A5SS	non-TRA
immature_vs_Aire_KO	ENSMUSG00000022185	-0.065	A5SS	non-TRA
immature_vs_Aire_KO	ENSMUSG00000030007	0.008	A5SS	non-TRA
immature_vs_Aire_KO	ENSMUSG00000022185	-0.08	A5SS	non-TRA
immature_vs_Aire_KO	ENSMUSG00000030707	0.056	A5SS	non-TRA
immature_vs_Aire_KO	ENSMUSG00000032498	0.046	A5SS	non-TRA
immature_vs_Aire_KO	ENSMUSG00000042700	-0.071	A5SS	non-TRA
immature_vs_Aire_KO	ENSMUSG00000048154	-0.231	A5SS	non-TRA
immature_vs_Aire_KO	ENSMUSG00000024666	0.168	A5SS	non-TRA
immature_vs_Aire_KO	ENSMUSG00000045636	-0.498	A5SS	non-TRA
immature_vs_Aire_KO	ENSMUSG00000019189	-0.322	A5SS	non-TRA
immature_vs_Aire_KO	ENSMUSG00000028134	-0.15	A5SS	non-TRA
immature_vs_Aire_KO	ENSMUSG00000057561	0.067	A5SS	non-TRA
immature_vs_Aire_KO	ENSMUSG00000026637	-0.089	A5SS	non-TRA
immature_vs_Aire_KO	ENSMUSG00000022788	0.342	A5SS	non-TRA
immature_vs_Aire_KO	ENSMUSG00000008348	0.07	A5SS	non-TRA
immature_vs_Aire_KO	ENSMUSG00000026851	0.026	A5SS	non-TRA
immature_vs_Aire_KO	ENSMUSG00000030423	0.027	A5SS	non-TRA
immature_vs_Aire_KO	ENSMUSG00000074129	0.028	A5SS	non-TRA
immature_vs_Aire_KO	ENSMUSG00000034731	0.038	A5SS	non-Aire TRA
immature_vs_Aire_KO	ENSMUSG00000071064	-0.366	A5SS	non-TRA
immature_vs_Aire_KO	ENSMUSG00000020640	0.035	A5SS	non-TRA
immature_vs_Aire_KO	ENSMUSG00000039230	0.022	A5SS	non-TRA
immature_vs_Aire_KO	ENSMUSG00000030047	0.044	A5SS	non-Aire TRA
immature_vs_Aire_KO	ENSMUSG00000022536	0.048	A5SS	non-TRA
immature_vs_Aire_KO	ENSMUSG00000043923	0.241	A5SS	non-TRA
immature_vs_Aire_KO	ENSMUSG00000090626	0.16	A5SS	non-TRA
immature_vs_Aire_KO	ENSMUSG00000024222	0.389	A5SS	non-TRA
immature_vs_Aire_KO	ENSMUSG00000026470	0.027	A5SS	non-TRA
immature_vs_Aire_KO	ENSMUSG00000060568	0.319	A5SS	non-TRA
immature_vs_Aire_KO	ENSMUSG00000022335	0.272	A5SS	non-TRA
immature_vs_Aire_KO	ENSMUSG00000071337	0.099	A5SS	non-TRA
immature_vs_Aire_KO	ENSMUSG00000050730	0.216	A5SS	non-TRA
immature_vs_Aire_KO	ENSMUSG00000039069	0.058	A5SS	non-TRA
immature_vs_Aire_KO	ENSMUSG00000025280	0.076	A5SS	non-TRA
immature_vs_Aire_KO	ENSMUSG00000070877	-0.407	A5SS	Aire-regulated TRA
immature_vs_Aire_KO	ENSMUSG00000038816	0.16	A5SS	non-TRA
immature_vs_Aire_KO	ENSMUSG00000048677	0.207	A5SS	non-TRA
immature_vs_Aire_KO	ENSMUSG00000048154	0.148	A5SS	non-TRA
immature_vs_Aire_KO	ENSMUSG00000043257	0.068	A5SS	non-TRA
immature_vs_Aire_KO	ENSMUSG00000024241	0.023	A5SS	non-TRA
immature_vs_Aire_KO	ENSMUSG00000005610	0.014	A5SS	non-TRA
immature_vs_Aire_KO	ENSMUSG00000016664	0.013	A5SS	non-TRA
immature_vs_Aire_KO	ENSMUSG00000028107	0.099	A5SS	non-TRA
immature_vs_Aire_KO	ENSMUSG00000048445	0.234	A5SS	non-TRA
immature_vs_Aire_KO	ENSMUSG00000025733	0.041	A5SS	non-TRA
immature_vs_Aire_KO	ENSMUSG00000028836	0.101	A5SS	non-TRA
immature_vs_Aire_KO	ENSMUSG00000055436	0.143	A5SS	non-TRA
immature_vs_Aire_KO	ENSMUSG00000057098	0.099	A5SS	non-TRA
immature_vs_Aire_KO	ENSMUSG00000031812	0.018	A5SS	non-TRA
immature_vs_Aire_KO	ENSMUSG00000000386	-0.056	A5SS	non-Aire TRA
immature_vs_Aire_KO	ENSMUSG00000031024	0.016	A5SS	non-TRA
immature_vs_Aire_KO	ENSMUSG00000029055	0.261	A5SS	non-TRA
immature_vs_Aire_KO	ENSMUSG00000034544	-0.039	A5SS	non-TRA
immature_vs_Aire_KO	ENSMUSG00000033102	0.165	A5SS	non-TRA
immature_vs_Aire_KO	ENSMUSG00000039701	-0.172	A5SS	non-TRA
immature_vs_Aire_KO	ENSMUSG00000032357	-0.106	A5SS	non-Aire TRA
immature_vs_Aire_KO	ENSMUSG00000031916	0.117	A5SS	non-TRA
immature_vs_Aire_KO	ENSMUSG00000024169	0.067	A5SS	non-TRA
immature_vs_Aire_KO	ENSMUSG00000019564	0.208	A5SS	non-TRA
immature_vs_Aire_KO	ENSMUSG00000070738	0.12	A5SS	non-TRA
immature_vs_Aire_KO	ENSMUSG00000032177	-0.091	A5SS	non-TRA
immature_vs_Aire_KO	ENSMUSG00000079014	0.072	A5SS	non-Aire TRA
immature_vs_Aire_KO	ENSMUSG00000021144	0.073	A5SS	non-TRA
immature_vs_Aire_KO	ENSMUSG00000032311	0.171	A5SS	non-TRA
immature_vs_Aire_KO	ENSMUSG00000024856	-0.06	A5SS	non-TRA
immature_vs_Aire_KO	ENSMUSG00000040111	0.067	A5SS	non-TRA
immature_vs_Aire_KO	ENSMUSG00000024349	0.017	A5SS	non-TRA
immature_vs_Aire_KO	ENSMUSG00000020823	0.019	A5SS	non-TRA
immature_vs_Aire_KO	ENSMUSG00000031708	0.041	A5SS	non-TRA
immature_vs_Aire_KO	ENSMUSG00000032294	-0.09	A5SS	non-TRA
immature_vs_Aire_KO	ENSMUSG00000030811	0.073	A5SS	non-TRA
immature_vs_Aire_KO	ENSMUSG00000045394	0.048	A5SS	non-TRA
immature_vs_Aire_KO	ENSMUSG00000033943	0.174	A5SS	non-TRA
immature_vs_Aire_KO	ENSMUSG00000044562	-0.099	A5SS	non-TRA
immature_vs_Aire_KO	ENSMUSG00000020456	0.294	A5SS	non-TRA
immature_vs_Aire_KO	ENSMUSG00000024127	0.024	A5SS	non-TRA
immature_vs_Aire_KO	ENSMUSG00000032530	0.435	A5SS	non-Aire TRA
immature_vs_Aire_KO	ENSMUSG00000029787	0.027	A5SS	non-TRA
immature_vs_Aire_KO	ENSMUSG00000074764	0.154	A5SS	non-Aire TRA
immature_vs_Aire_KO	ENSMUSG00000041528	0.12	A5SS	non-TRA
immature_vs_Aire_KO	ENSMUSG00000045827	0.069	A5SS	non-TRA
immature_vs_Aire_KO	ENSMUSG00000000738	0.06	A5SS	non-TRA
immature_vs_Aire_KO	ENSMUSG00000030868	0.398	A5SS	non-TRA
immature_vs_Aire_KO	ENSMUSG00000029394	0.015	A5SS	non-TRA
immature_vs_Aire_KO	ENSMUSG00000027641	-0.05	A5SS	non-TRA
immature_vs_Aire_KO	ENSMUSG00000021918	0.059	A5SS	non-TRA
immature_vs_Aire_KO	ENSMUSG00000060012	0.015	A5SS	non-TRA
immature_vs_Aire_KO	ENSMUSG00000075229	0.062	A5SS	non-TRA
immature_vs_Aire_KO	ENSMUSG00000019947	0.033	A5SS	non-TRA
immature_vs_Aire_KO	ENSMUSG00000026987	0.054	A5SS	non-TRA
immature_vs_Aire_KO	ENSMUSG00000033826	-0.087	A5SS	non-Aire TRA
immature_vs_Aire_KO	ENSMUSG00000028414	0.058	A5SS	non-TRA
immature_vs_Aire_KO	ENSMUSG00000023951	0.09	A5SS	non-TRA
immature_vs_Aire_KO	ENSMUSG00000074797	0.016	A5SS	non-TRA
immature_vs_Aire_KO	ENSMUSG00000024404	0.034	A5SS	non-TRA
immature_vs_Aire_KO	ENSMUSG00000037058	0.137	A5SS	non-TRA
immature_vs_Aire_KO	ENSMUSG00000033029	-0.025	A5SS	non-TRA
immature_vs_Aire_KO	ENSMUSG00000018796	0.041	A5SS	non-TRA
immature_vs_Aire_KO	ENSMUSG00000072214	0.123	A5SS	non-TRA
immature_vs_Aire_KO	ENSMUSG00000026632	0.121	A5SS	non-TRA
immature_vs_Aire_KO	ENSMUSG00000022793	-0.083	A5SS	non-TRA
immature_vs_Aire_KO	ENSMUSG00000066037	-0.122	A5SS	non-TRA
immature_vs_Aire_KO	ENSMUSG00000033075	-0.032	A5SS	non-TRA
immature_vs_Aire_KO	ENSMUSG00000023952	0.08	A5SS	non-TRA
immature_vs_Aire_KO	ENSMUSG00000021830	0.093	A5SS	non-TRA
immature_vs_Aire_KO	ENSMUSG00000041915	0.155	A5SS	non-TRA
immature_vs_Aire_KO	ENSMUSG00000024381	0.212	A5SS	non-TRA
immature_vs_Aire_KO	ENSMUSG00000032688	0.054	A5SS	non-TRA
immature_vs_Aire_KO	ENSMUSG00000023186	0.012	A5SS	non-TRA
immature_vs_Aire_KO	ENSMUSG00000072501	0.086	A5SS	non-TRA
immature_vs_Aire_KO	ENSMUSG00000033060	0.045	A5SS	non-TRA
immature_vs_Aire_KO	ENSMUSG00000030852	0.061	A5SS	non-TRA
immature_vs_Aire_KO	ENSMUSG00000026867	0.133	A5SS	non-TRA
immature_vs_Aire_KO	ENSMUSG00000022900	-0.042	A5SS	non-TRA
immature_vs_Aire_KO	ENSMUSG00000032181	-0.388	A5SS	Aire-regulated TRA
immature_vs_Aire_KO	ENSMUSG00000034157	0.42	A5SS	non-TRA
immature_vs_Aire_KO	ENSMUSG00000020680	0.091	A5SS	non-TRA
immature_vs_Aire_KO	ENSMUSG00000036941	0.218	A5SS	non-TRA
immature_vs_Aire_KO	ENSMUSG00000002227	-0.139	A5SS	non-TRA
immature_vs_Aire_KO	ENSMUSG00000062729	0.151	A5SS	non-TRA
immature_vs_Aire_KO	ENSMUSG00000067768	-0.296	A5SS	non-Aire TRA
immature_vs_Aire_KO	ENSMUSG00000056962	0.128	A5SS	non-TRA
immature_vs_Aire_KO	ENSMUSG00000039307	-0.43	A5SS	non-TRA
immature_vs_Aire_KO	ENSMUSG00000016921	0.227	A5SS	non-TRA
immature_vs_Aire_KO	ENSMUSG00000043257	0.052	A5SS	non-TRA
immature_vs_Aire_KO	ENSMUSG00000022808	0.014	A5SS	non-TRA
immature_vs_Aire_KO	ENSMUSG00000022475	0.046	A5SS	non-TRA
immature_vs_Aire_KO	ENSMUSG00000025332	0.011	A5SS	non-TRA
immature_vs_Aire_KO	ENSMUSG00000021068	0.027	A5SS	non-TRA
immature_vs_Aire_KO	ENSMUSG00000021192	0.021	A5SS	non-TRA
immature_vs_Aire_KO	ENSMUSG00000006641	-0.249	A5SS	non-TRA
immature_vs_Aire_KO	ENSMUSG00000039929	0.068	A5SS	non-TRA
immature_vs_Aire_KO	ENSMUSG00000066952	-0.417	A5SS	non-Aire TRA
immature_vs_Aire_KO	ENSMUSG00000000823	0.329	A5SS	non-TRA
immature_vs_Aire_KO	ENSMUSG00000025413	0.028	A5SS	non-TRA
immature_vs_Aire_KO	ENSMUSG00000031767	0.109	A5SS	non-TRA
immature_vs_Aire_KO	ENSMUSG00000063626	0.265	A5SS	non-Aire TRA
immature_vs_Aire_KO	ENSMUSG00000004768	0.137	A5SS	non-TRA
immature_vs_Aire_KO	ENSMUSG00000073987	0.011	A5SS	non-TRA
immature_vs_Aire_KO	ENSMUSG00000046836	0.153	A5SS	non-TRA
immature_vs_Aire_KO	ENSMUSG00000018974	0.044	A5SS	non-TRA
immature_vs_Aire_KO	ENSMUSG00000031671	-0.137	A5SS	non-TRA
immature_vs_Aire_KO	ENSMUSG00000025997	0.266	A5SS	non-TRA
immature_vs_Aire_KO	ENSMUSG00000022255	0.117	A5SS	non-TRA
immature_vs_Aire_KO	ENSMUSG00000002486	0.087	A5SS	non-TRA
immature_vs_Aire_KO	ENSMUSG00000020456	0.071	A5SS	non-TRA
immature_vs_Aire_KO	ENSMUSG00000015127	-0.111	A5SS	non-TRA
immature_vs_Aire_KO	ENSMUSG00000039086	0.084	A5SS	non-TRA
immature_vs_Aire_KO	ENSMUSG00000001569	-0.07	A5SS	non-TRA
immature_vs_Aire_KO	ENSMUSG00000014601	0.053	A5SS	non-TRA
immature_vs_Aire_KO	ENSMUSG00000040687	0.046	A5SS	non-TRA
immature_vs_Aire_KO	ENSMUSG00000031283	0.202	A5SS	non-TRA
immature_vs_Aire_KO	ENSMUSG00000005580	0.04	A5SS	non-TRA
immature_vs_Aire_KO	ENSMUSG00000048930	0.086	A5SS	non-TRA
immature_vs_Aire_KO	ENSMUSG00000031858	0.12	A5SS	non-TRA
immature_vs_Aire_KO	ENSMUSG00000048677	0.217	A5SS	non-TRA
immature_vs_Aire_KO	ENSMUSG00000031434	-0.07	A5SS	non-TRA
immature_vs_Aire_KO	ENSMUSG00000038708	0.017	A5SS	non-TRA
immature_vs_Aire_KO	ENSMUSG00000029131	0.144	A5SS	non-TRA
immature_vs_Aire_KO	ENSMUSG00000035245	0.025	A5SS	non-TRA
immature_vs_Aire_KO	ENSMUSG00000079363	-0.123	A5SS	non-TRA
immature_vs_Aire_KO	ENSMUSG00000030365	0.067	A5SS	non-Aire TRA
immature_vs_Aire_KO	ENSMUSG00000054051	0.048	A5SS	non-TRA
immature_vs_Aire_KO	ENSMUSG00000023079	-0.057	A5SS	non-TRA
immature_vs_Aire_KO	ENSMUSG00000057914	0.239	A5SS	non-TRA
immature_vs_Aire_KO	ENSMUSG00000016918	0.09	A5SS	non-TRA
immature_vs_Aire_KO	ENSMUSG00000004364	0.049	A5SS	non-TRA
immature_vs_Aire_KO	ENSMUSG00000001418	0.026	A5SS	non-TRA
immature_vs_Aire_KO	ENSMUSG00000051557	-0.137	A5SS	non-TRA
immature_vs_Aire_KO	ENSMUSG00000030061	0.057	A5SS	non-TRA
immature_vs_Aire_KO	ENSMUSG00000029669	-0.056	A5SS	non-TRA
immature_vs_Aire_KO	ENSMUSG00000004929	0.022	A5SS	non-TRA
immature_vs_Aire_KO	ENSMUSG00000042719	-0.024	A5SS	non-TRA
immature_vs_Aire_KO	ENSMUSG00000052609	0.089	A5SS	non-TRA
immature_vs_Aire_KO	ENSMUSG00000045827	0.109	A5SS	non-TRA
immature_vs_Aire_KO	ENSMUSG00000029071	-0.026	A5SS	non-TRA
immature_vs_Aire_KO	ENSMUSG00000028268	0.015	A5SS	non-TRA
immature_vs_Aire_KO	ENSMUSG00000021428	-0.036	A5SS	non-TRA
immature_vs_Aire_KO	ENSMUSG00000023034	0.27	A5SS	non-TRA
immature_vs_Aire_KO	ENSMUSG00000064289	0.019	A5SS	non-TRA
immature_vs_Aire_KO	ENSMUSG00000048897	0.045	A5SS	non-TRA
immature_vs_Aire_KO	ENSMUSG00000001248	0.219	A5SS	non-TRA
immature_vs_Aire_KO	ENSMUSG00000026107	0.104	A5SS	non-TRA
immature_vs_Aire_KO	ENSMUSG00000018669	0.03	A5SS	non-TRA
immature_vs_Aire_KO	ENSMUSG00000026414	0.069	A5SS	non-Aire TRA
immature_vs_Aire_KO	ENSMUSG00000029134	0.426	A5SS	non-Aire TRA
immature_vs_Aire_KO	ENSMUSG00000038520	0.082	A5SS	non-TRA
immature_vs_Aire_KO	ENSMUSG00000000739	0.131	A5SS	non-TRA
immature_vs_Aire_KO	ENSMUSG00000024393	0.134	A5SS	non-TRA
immature_vs_Aire_KO	ENSMUSG00000025050	0.109	A5SS	non-TRA
immature_vs_Aire_KO	ENSMUSG00000035186	-0.14	A5SS	non-Aire TRA
immature_vs_Aire_KO	ENSMUSG00000025494	0.3	A5SS	non-TRA
immature_vs_Aire_KO	ENSMUSG00000027466	0.089	A5SS	non-TRA
immature_vs_Aire_KO	ENSMUSG00000059142	0.2	A5SS	non-TRA
immature_vs_Aire_KO	ENSMUSG00000028653	-0.121	A5SS	non-TRA
immature_vs_Aire_KO	ENSMUSG00000045095	-0.17	A5SS	non-TRA
immature_vs_Aire_KO	ENSMUSG00000027367	-0.044	A5SS	non-TRA
immature_vs_Aire_KO	ENSMUSG00000030868	0.046	A5SS	non-TRA
immature_vs_Aire_KO	ENSMUSG00000026784	0.185	A5SS	non-TRA
immature_vs_Aire_KO	ENSMUSG00000031916	0.135	A5SS	non-TRA
immature_vs_Aire_KO	ENSMUSG00000079014	0.106	A5SS	non-Aire TRA
immature_vs_Aire_KO	ENSMUSG00000033416	0.072	A5SS	non-TRA
immature_vs_Aire_KO	ENSMUSG00000036632	-0.063	A5SS	non-TRA
immature_vs_Aire_KO	ENSMUSG00000039117	0.151	A5SS	non-TRA
immature_vs_Aire_KO	ENSMUSG00000028458	-0.126	A5SS	non-TRA
immature_vs_Aire_KO	ENSMUSG00000028961	0.131	A5SS	non-TRA
immature_vs_Aire_KO	ENSMUSG00000038170	0.013	A5SS	non-TRA
immature_vs_Aire_KO	ENSMUSG00000037816	-0.092	A5SS	non-TRA
immature_vs_Aire_KO	ENSMUSG00000001128	0.104	A5SS	non-TRA
immature_vs_Aire_KO	ENSMUSG00000021998	0.042	A5SS	non-TRA
immature_vs_Aire_KO	ENSMUSG00000003435	0.052	A5SS	non-TRA
immature_vs_Aire_KO	ENSMUSG00000053646	0.211	A5SS	non-TRA
immature_vs_Aire_KO	ENSMUSG00000032097	-0.138	A5SS	non-TRA
immature_vs_Aire_KO	ENSMUSG00000017670	0.03	A5SS	non-TRA
immature_vs_Aire_KO	ENSMUSG00000022353	0.02	A5SS	non-TRA
immature_vs_Aire_KO	ENSMUSG00000033955	-0.028	A5SS	non-TRA
immature_vs_Aire_KO	ENSMUSG00000028150	0.069	A5SS	non-TRA
immature_vs_Aire_KO	ENSMUSG00000018412	0.037	A5SS	non-TRA
immature_vs_Aire_KO	ENSMUSG00000068299	-0.186	A5SS	non-TRA
immature_vs_Aire_KO	ENSMUSG00000064284	0.083	A5SS	non-TRA
immature_vs_Aire_KO	ENSMUSG00000026107	0.081	A5SS	non-TRA
immature_vs_Aire_KO	ENSMUSG00000047036	-0.065	A5SS	non-TRA
immature_vs_Aire_KO	ENSMUSG00000024666	0.178	A5SS	non-TRA
immature_vs_Aire_KO	ENSMUSG00000023952	0.077	A5SS	non-TRA
immature_vs_Aire_KO	ENSMUSG00000018666	0.136	A5SS	non-TRA
immature_vs_Aire_KO	ENSMUSG00000013878	0.275	A5SS	non-TRA
immature_vs_Aire_KO	ENSMUSG00000028224	-0.02	A5SS	non-TRA
immature_vs_Aire_KO	ENSMUSG00000032342	0.143	A5SS	non-TRA
immature_vs_Aire_KO	ENSMUSG00000031729	0.05	A5SS	non-TRA
immature_vs_Aire_KO	ENSMUSG00000054720	-0.147	A5SS	non-TRA
immature_vs_Aire_KO	ENSMUSG00000089809	0.03	A5SS	non-TRA
immature_vs_Aire_KO	ENSMUSG00000068742	-0.074	A5SS	non-TRA
immature_vs_Aire_KO	ENSMUSG00000026812	0.133	A5SS	non-TRA
immature_vs_Aire_KO	ENSMUSG00000071669	0.028	A5SS	non-TRA
immature_vs_Aire_KO	ENSMUSG00000052395	0.095	A5SS	non-TRA
immature_vs_Aire_KO	ENSMUSG00000022529	0.118	A5SS	non-TRA
immature_vs_Aire_KO	ENSMUSG00000038072	0.021	A5SS	non-TRA
immature_vs_Aire_KO	ENSMUSG00000037577	0.259	A5SS	Aire-regulated TRA
immature_vs_Aire_KO	ENSMUSG00000037816	0.043	A5SS	non-TRA
immature_vs_Aire_KO	ENSMUSG00000037971	0.066	A5SS	non-TRA
immature_vs_Aire_KO	ENSMUSG00000041757	-0.151	A5SS	non-TRA
immature_vs_Aire_KO	ENSMUSG00000026070	-0.072	A5SS	non-Aire TRA
immature_vs_Aire_KO	ENSMUSG00000045333	0.138	A5SS	non-TRA
immature_vs_Aire_KO	ENSMUSG00000031601	0.14	A5SS	non-TRA
immature_vs_Aire_KO	ENSMUSG00000002486	0.169	A5SS	non-TRA
immature_vs_Aire_KO	ENSMUSG00000019951	0.13	A5SS	non-TRA
immature_vs_Aire_KO	ENSMUSG00000022515	0.045	A5SS	non-TRA
immature_vs_Aire_KO	ENSMUSG00000029455	0.013	A5SS	non-TRA
immature_vs_Aire_KO	ENSMUSG00000020634	0.082	A5SS	non-TRA
immature_vs_Aire_KO	ENSMUSG00000026211	-0.04	A5SS	non-TRA
immature_vs_Aire_KO	ENSMUSG00000047030	-0.321	A5SS	non-TRA
immature_vs_Aire_KO	ENSMUSG00000030423	0.025	A5SS	non-TRA
immature_vs_Aire_KO	ENSMUSG00000032498	0.044	A5SS	non-TRA
immature_vs_Aire_KO	ENSMUSG00000018401	0.018	A5SS	non-TRA
immature_vs_Aire_KO	ENSMUSG00000006731	0.057	A5SS	non-TRA
immature_vs_Aire_KO	ENSMUSG00000026189	0.104	A5SS	non-TRA
immature_vs_Aire_KO	ENSMUSG00000029406	-0.304	A5SS	non-TRA
immature_vs_Aire_KO	ENSMUSG00000042439	-0.439	A5SS	non-TRA
immature_vs_Aire_KO	ENSMUSG00000037553	0.048	A5SS	non-TRA
immature_vs_Aire_KO	ENSMUSG00000031982	0.152	A5SS	non-TRA
immature_vs_Aire_KO	ENSMUSG00000024236	0.038	A5SS	non-TRA
immature_vs_Aire_KO	ENSMUSG00000020279	-0.051	A5SS	non-Aire TRA
immature_vs_Aire_KO	ENSMUSG00000041757	0.022	A5SS	non-TRA
immature_vs_Aire_KO	ENSMUSG00000062906	0.291	A5SS	non-TRA
immature_vs_Aire_KO	ENSMUSG00000020930	-0.449	A5SS	non-Aire TRA
immature_vs_Aire_KO	ENSMUSG00000055670	0.058	A5SS	non-TRA
immature_vs_Aire_KO	ENSMUSG00000047989	0.03	A5SS	non-TRA
immature_vs_Aire_KO	ENSMUSG00000054836	0.071	A5SS	non-TRA
immature_vs_Aire_KO	ENSMUSG00000014748	0.032	A5SS	non-TRA
immature_vs_Aire_KO	ENSMUSG00000047284	0.051	A5SS	non-TRA
immature_vs_Aire_KO	ENSMUSG00000028247	0.02	A5SS	non-TRA
immature_vs_Aire_KO	ENSMUSG00000037773	0.061	A5SS	non-TRA
immature_vs_Aire_KO	ENSMUSG00000061589	-0.068	A5SS	non-TRA
immature_vs_Aire_KO	ENSMUSG00000024186	-0.245	A5SS	non-TRA
immature_vs_Aire_KO	ENSMUSG00000026096	-0.131	A5SS	non-TRA
immature_vs_Aire_KO	ENSMUSG00000027533	0.039	A5SS	non-TRA
immature_vs_Aire_KO	ENSMUSG00000035495	-0.148	A5SS	non-TRA
immature_vs_Aire_KO	ENSMUSG00000019790	0.202	A5SS	non-TRA
immature_vs_Aire_KO	ENSMUSG00000036422	-0.301	A5SS	non-Aire TRA
immature_vs_Aire_KO	ENSMUSG00000078350	0.081	A5SS	non-TRA
immature_vs_Aire_KO	ENSMUSG00000020523	0.028	A5SS	non-TRA
immature_vs_Aire_KO	ENSMUSG00000025137	0.143	A5SS	non-TRA
immature_vs_Aire_KO	ENSMUSG00000046711	-0.125	A5SS	non-TRA
immature_vs_Aire_KO	ENSMUSG00000040389	0.096	A5SS	non-TRA
immature_vs_Aire_KO	ENSMUSG00000026576	0.188	A5SS	non-TRA
immature_vs_Aire_KO	ENSMUSG00000038371	0.199	A5SS	non-TRA
immature_vs_Aire_KO	ENSMUSG00000051235	0.206	A5SS	non-Aire TRA
immature_vs_Aire_KO	ENSMUSG00000028455	0.016	A5SS	non-TRA
immature_vs_Aire_KO	ENSMUSG00000021738	0.086	A5SS	non-TRA
immature_vs_Aire_KO	ENSMUSG00000058979	0.097	A5SS	non-TRA
immature_vs_Aire_KO	ENSMUSG00000013997	0.084	A5SS	non-TRA
immature_vs_Aire_KO	ENSMUSG00000052026	0.036	A5SS	non-Aire TRA
immature_vs_Aire_KO	ENSMUSG00000032480	0.116	A5SS	non-TRA
immature_vs_Aire_KO	ENSMUSG00000029428	0.071	A5SS	non-TRA
immature_vs_Aire_KO	ENSMUSG00000040495	0.46	A3SS	non-Aire TRA
immature_vs_Aire_KO	ENSMUSG00000005417	0.079	A3SS	non-TRA
immature_vs_Aire_KO	ENSMUSG00000005417	0.074	A3SS	non-TRA
immature_vs_Aire_KO	ENSMUSG00000062609	-0.193	A3SS	non-Aire TRA
immature_vs_Aire_KO	ENSMUSG00000026031	-0.578	A3SS	non-TRA
immature_vs_Aire_KO	ENSMUSG00000019173	-0.13	A3SS	non-TRA
immature_vs_Aire_KO	ENSMUSG00000027797	0.106	A3SS	non-TRA
immature_vs_Aire_KO	ENSMUSG00000010461	0.42	A3SS	non-Aire TRA
immature_vs_Aire_KO	ENSMUSG00000018334	-0.347	A3SS	non-TRA
immature_vs_Aire_KO	ENSMUSG00000031441	-0.286	A3SS	non-TRA
immature_vs_Aire_KO	ENSMUSG00000031441	-0.271	A3SS	non-TRA
immature_vs_Aire_KO	ENSMUSG00000043333	0.173	A3SS	non-Aire TRA
immature_vs_Aire_KO	ENSMUSG00000024044	0.478	A3SS	non-TRA
immature_vs_Aire_KO	ENSMUSG00000027455	0.153	A3SS	non-TRA
immature_vs_Aire_KO	ENSMUSG00000063450	0.289	A3SS	non-TRA
immature_vs_Aire_KO	ENSMUSG00000050379	-0.321	A3SS	non-TRA
immature_vs_Aire_KO	ENSMUSG00000004980	0.237	A3SS	non-TRA
immature_vs_Aire_KO	ENSMUSG00000008658	0.153	A3SS	non-Aire TRA
immature_vs_Aire_KO	ENSMUSG00000021171	0.139	A3SS	non-TRA
immature_vs_Aire_KO	ENSMUSG00000054387	0.308	A3SS	non-TRA
immature_vs_Aire_KO	ENSMUSG00000039737	0.083	A3SS	non-TRA
immature_vs_Aire_KO	ENSMUSG00000026987	0.229	A3SS	non-TRA
immature_vs_Aire_KO	ENSMUSG00000029817	0.104	A3SS	non-TRA
immature_vs_Aire_KO	ENSMUSG00000021244	0.065	A3SS	non-TRA
immature_vs_Aire_KO	ENSMUSG00000014195	0.092	A3SS	non-TRA
immature_vs_Aire_KO	ENSMUSG00000028608	0.124	A3SS	non-TRA
immature_vs_Aire_KO	ENSMUSG00000020777	0.226	A3SS	non-TRA
immature_vs_Aire_KO	ENSMUSG00000000308	-0.318	A3SS	non-TRA
immature_vs_Aire_KO	ENSMUSG00000054302	0.067	A3SS	non-TRA
immature_vs_Aire_KO	ENSMUSG00000028464	0.022	A3SS	non-TRA
immature_vs_Aire_KO	ENSMUSG00000054387	0.273	A3SS	non-TRA
immature_vs_Aire_KO	ENSMUSG00000022749	0.073	A3SS	non-TRA
immature_vs_Aire_KO	ENSMUSG00000025199	0.182	A3SS	non-TRA
immature_vs_Aire_KO	ENSMUSG00000032366	-0.253	A3SS	non-TRA
immature_vs_Aire_KO	ENSMUSG00000033508	0.249	A3SS	non-Aire TRA
immature_vs_Aire_KO	ENSMUSG00000029413	-0.106	A3SS	non-TRA
immature_vs_Aire_KO	ENSMUSG00000059586	0.017	A3SS	non-TRA
immature_vs_Aire_KO	ENSMUSG00000016921	0.175	A3SS	non-TRA
immature_vs_Aire_KO	ENSMUSG00000026029	0.066	A3SS	non-TRA
immature_vs_Aire_KO	ENSMUSG00000025199	0.181	A3SS	non-TRA
immature_vs_Aire_KO	ENSMUSG00000023206	0.108	A3SS	non-TRA
immature_vs_Aire_KO	ENSMUSG00000009585	0.218	A3SS	non-TRA
immature_vs_Aire_KO	ENSMUSG00000041351	0.083	A3SS	non-TRA
immature_vs_Aire_KO	ENSMUSG00000033508	0.237	A3SS	non-Aire TRA
immature_vs_Aire_KO	ENSMUSG00000040242	0.055	A3SS	non-TRA
immature_vs_Aire_KO	ENSMUSG00000061288	0.324	A3SS	non-TRA
immature_vs_Aire_KO	ENSMUSG00000031516	0.045	A3SS	non-TRA
immature_vs_Aire_KO	ENSMUSG00000004980	0.137	A3SS	non-TRA
immature_vs_Aire_KO	ENSMUSG00000026721	0.115	A3SS	non-TRA
immature_vs_Aire_KO	ENSMUSG00000021417	0.073	A3SS	non-TRA
immature_vs_Aire_KO	ENSMUSG00000035673	0.094	A3SS	non-TRA
immature_vs_Aire_KO	ENSMUSG00000025420	0.854	A3SS	Aire-regulated TRA
immature_vs_Aire_KO	ENSMUSG00000017176	0.107	A3SS	non-TRA
immature_vs_Aire_KO	ENSMUSG00000024381	0.128	A3SS	non-TRA
immature_vs_Aire_KO	ENSMUSG00000021870	0.202	A3SS	non-TRA
immature_vs_Aire_KO	ENSMUSG00000030560	0.015	A3SS	non-TRA
immature_vs_Aire_KO	ENSMUSG00000039680	0.048	A3SS	non-TRA
immature_vs_Aire_KO	ENSMUSG00000024897	-0.6	A3SS	non-TRA
immature_vs_Aire_KO	ENSMUSG00000021669	0.116	A3SS	non-TRA
immature_vs_Aire_KO	ENSMUSG00000025135	0.019	A3SS	non-TRA
immature_vs_Aire_KO	ENSMUSG00000022517	0.056	A3SS	non-TRA
immature_vs_Aire_KO	ENSMUSG00000031078	0.111	A3SS	non-TRA
immature_vs_Aire_KO	ENSMUSG00000040370	0.228	A3SS	non-TRA
immature_vs_Aire_KO	ENSMUSG00000018820	0.067	A3SS	non-TRA
immature_vs_Aire_KO	ENSMUSG00000031098	0.685	A3SS	Aire-regulated TRA
immature_vs_Aire_KO	ENSMUSG00000029817	0.233	A3SS	non-TRA
immature_vs_Aire_KO	ENSMUSG00000026837	-0.347	A3SS	non-TRA
immature_vs_Aire_KO	ENSMUSG00000022517	0.026	A3SS	non-TRA
immature_vs_Aire_KO	ENSMUSG00000040296	0.078	A3SS	non-TRA
immature_vs_Aire_KO	ENSMUSG00000002733	0.024	A3SS	non-TRA
immature_vs_Aire_KO	ENSMUSG00000049214	0.257	A3SS	non-Aire TRA
immature_vs_Aire_KO	ENSMUSG00000023206	0.256	A3SS	non-TRA
immature_vs_Aire_KO	ENSMUSG00000039953	0.026	A3SS	non-TRA
immature_vs_Aire_KO	ENSMUSG00000068921	0.329	A3SS	non-TRA
immature_vs_Aire_KO	ENSMUSG00000002031	0.057	A3SS	non-TRA
immature_vs_Aire_KO	ENSMUSG00000028034	0.13	A3SS	non-TRA
immature_vs_Aire_KO	ENSMUSG00000063011	0.059	A3SS	non-Aire TRA
immature_vs_Aire_KO	ENSMUSG00000038733	0.046	A3SS	non-TRA
immature_vs_Aire_KO	ENSMUSG00000041890	0.442	A3SS	non-TRA
immature_vs_Aire_KO	ENSMUSG00000020109	0.046	A3SS	non-TRA
immature_vs_Aire_KO	ENSMUSG00000037437	-1	A3SS	non-Aire TRA
immature_vs_Aire_KO	ENSMUSG00000058586	0.085	A3SS	non-TRA
immature_vs_Aire_KO	ENSMUSG00000015937	0.115	A3SS	non-TRA
immature_vs_Aire_KO	ENSMUSG00000027751	0.289	A3SS	non-TRA
immature_vs_Aire_KO	ENSMUSG00000033039	-0.146	A3SS	non-TRA
immature_vs_Aire_KO	ENSMUSG00000022119	0.235	A3SS	non-TRA
immature_vs_Aire_KO	ENSMUSG00000047656	0.291	A3SS	non-TRA
immature_vs_Aire_KO	ENSMUSG00000061904	0.039	A3SS	non-TRA
immature_vs_Aire_KO	ENSMUSG00000031078	0.133	A3SS	non-TRA
immature_vs_Aire_KO	ENSMUSG00000000934	-0.69	A3SS	non-TRA
immature_vs_Aire_KO	ENSMUSG00000027901	0.055	A3SS	non-TRA
immature_vs_Aire_KO	ENSMUSG00000020866	0.905	A3SS	non-TRA
immature_vs_Aire_KO	ENSMUSG00000028107	0.107	A3SS	non-TRA
immature_vs_Aire_KO	ENSMUSG00000033039	-0.145	A3SS	non-TRA
immature_vs_Aire_KO	ENSMUSG00000034744	0.072	A3SS	non-TRA
immature_vs_Aire_KO	ENSMUSG00000032497	0.6	A3SS	non-TRA
immature_vs_Aire_KO	ENSMUSG00000029616	0.022	A3SS	non-TRA
immature_vs_Aire_KO	ENSMUSG00000071172	0.127	A3SS	non-TRA
immature_vs_Aire_KO	ENSMUSG00000090150	0.022	A3SS	non-TRA
immature_vs_Aire_KO	ENSMUSG00000031516	0.247	A3SS	non-TRA
immature_vs_Aire_KO	ENSMUSG00000056228	0.23	A3SS	non-TRA
immature_vs_Aire_KO	ENSMUSG00000026153	0.288	A3SS	non-TRA
immature_vs_Aire_KO	ENSMUSG00000031979	0.095	A3SS	non-TRA
immature_vs_Aire_KO	ENSMUSG00000039648	0.105	A3SS	non-TRA
immature_vs_Aire_KO	ENSMUSG00000022185	0.111	A3SS	non-TRA
immature_vs_Aire_KO	ENSMUSG00000056228	0.231	A3SS	non-TRA
immature_vs_Aire_KO	ENSMUSG00000056228	0.228	A3SS	non-TRA
immature_vs_Aire_KO	ENSMUSG00000032519	0.075	A3SS	non-TRA
immature_vs_Aire_KO	ENSMUSG00000029797	0.201	A3SS	non-Aire TRA
immature_vs_Aire_KO	ENSMUSG00000021115	0.232	A3SS	non-TRA
immature_vs_Aire_KO	ENSMUSG00000019432	0.056	A3SS	non-TRA
immature_vs_Aire_KO	ENSMUSG00000027901	0.114	A3SS	non-TRA
immature_vs_Aire_KO	ENSMUSG00000034101	-0.287	A3SS	non-TRA
immature_vs_Aire_KO	ENSMUSG00000029616	0.022	A3SS	non-TRA
immature_vs_Aire_KO	ENSMUSG00000018661	0.089	A3SS	non-TRA
immature_vs_Aire_KO	ENSMUSG00000029804	0.213	A3SS	non-TRA
immature_vs_Aire_KO	ENSMUSG00000021285	-0.068	A3SS	non-TRA
immature_vs_Aire_KO	ENSMUSG00000028608	0.1	A3SS	non-TRA
immature_vs_Aire_KO	ENSMUSG00000018661	0.09	A3SS	non-TRA
immature_vs_Aire_KO	ENSMUSG00000028838	-0.083	A3SS	non-Aire TRA
immature_vs_Aire_KO	ENSMUSG00000020224	0.015	A3SS	non-TRA
immature_vs_Aire_KO	ENSMUSG00000058013	0.11	A3SS	non-TRA
immature_vs_Aire_KO	ENSMUSG00000020982	0.05	A3SS	non-TRA
immature_vs_Aire_KO	ENSMUSG00000003033	0.062	A3SS	non-TRA
immature_vs_Aire_KO	ENSMUSG00000025473	0.042	A3SS	non-TRA
immature_vs_Aire_KO	ENSMUSG00000068206	0.054	A3SS	non-TRA
immature_vs_Aire_KO	ENSMUSG00000031256	0.661	A3SS	non-TRA
immature_vs_Aire_KO	ENSMUSG00000032295	0.086	A3SS	non-TRA
immature_vs_Aire_KO	ENSMUSG00000096054	0.208	A3SS	non-TRA
immature_vs_Aire_KO	ENSMUSG00000002107	0.016	A3SS	non-TRA
immature_vs_Aire_KO	ENSMUSG00000026103	0.095	A3SS	non-TRA
immature_vs_Aire_KO	ENSMUSG00000020526	0.08	A3SS	non-TRA
immature_vs_Aire_KO	ENSMUSG00000029213	0.028	A3SS	non-TRA
immature_vs_Aire_KO	ENSMUSG00000037989	0.613	A3SS	non-TRA
immature_vs_Aire_KO	ENSMUSG00000031586	0.063	A3SS	non-TRA
immature_vs_Aire_KO	ENSMUSG00000036352	0.056	A3SS	non-TRA
immature_vs_Aire_KO	ENSMUSG00000012819	0.795	A3SS	non-Aire TRA
immature_vs_Aire_KO	ENSMUSG00000002635	0.056	A3SS	non-TRA
immature_vs_Aire_KO	ENSMUSG00000032340	0.23	A3SS	non-TRA
immature_vs_Aire_KO	ENSMUSG00000023206	0.098	A3SS	non-TRA
immature_vs_Aire_KO	ENSMUSG00000027424	0.112	A3SS	non-TRA
immature_vs_Aire_KO	ENSMUSG00000035297	0.591	A3SS	non-TRA
immature_vs_Aire_KO	ENSMUSG00000036882	0.627	A3SS	non-TRA
immature_vs_Aire_KO	ENSMUSG00000067365	0.028	A3SS	non-TRA
immature_vs_Aire_KO	ENSMUSG00000025794	0.018	A3SS	non-TRA
immature_vs_Aire_KO	ENSMUSG00000047798	-0.482	A3SS	Aire-regulated TRA
immature_vs_Aire_KO	ENSMUSG00000043003	0.054	A3SS	non-Aire TRA
immature_vs_Aire_KO	ENSMUSG00000026643	-0.24	A3SS	non-TRA
immature_vs_Aire_KO	ENSMUSG00000022635	0.095	A3SS	non-TRA
immature_vs_Aire_KO	ENSMUSG00000034354	0.027	A3SS	non-TRA
immature_vs_Aire_KO	ENSMUSG00000023150	0.107	A3SS	non-TRA
immature_vs_Aire_KO	ENSMUSG00000039917	0.12	A3SS	non-TRA
immature_vs_Aire_KO	ENSMUSG00000031667	-0.661	A3SS	non-TRA
immature_vs_Aire_KO	ENSMUSG00000011256	0.034	A3SS	non-TRA
immature_vs_Aire_KO	ENSMUSG00000023118	0.022	A3SS	non-TRA
immature_vs_Aire_KO	ENSMUSG00000028882	-0.081	A3SS	non-TRA
immature_vs_Aire_KO	ENSMUSG00000018395	0.106	A3SS	non-TRA
immature_vs_Aire_KO	ENSMUSG00000004567	0.192	A3SS	non-TRA
immature_vs_Aire_KO	ENSMUSG00000021809	-0.241	A3SS	non-TRA
immature_vs_Aire_KO	ENSMUSG00000032094	0.187	A3SS	non-Aire TRA
immature_vs_Aire_KO	ENSMUSG00000059796	0.072	A3SS	non-TRA
immature_vs_Aire_KO	ENSMUSG00000020696	0.069	A3SS	non-TRA
immature_vs_Aire_KO	ENSMUSG00000025236	0.153	A3SS	non-TRA
immature_vs_Aire_KO	ENSMUSG00000009681	0.044	A3SS	non-TRA
immature_vs_Aire_KO	ENSMUSG00000017781	0.03	A3SS	non-TRA
immature_vs_Aire_KO	ENSMUSG00000038453	0.648	A3SS	Aire-regulated TRA
immature_vs_Aire_KO	ENSMUSG00000002981	0.125	A3SS	non-TRA
immature_vs_Aire_KO	ENSMUSG00000007783	-0.902	A3SS	non-TRA
immature_vs_Aire_KO	ENSMUSG00000040345	0.835	A3SS	non-TRA
immature_vs_Aire_KO	ENSMUSG00000044339	0.146	A3SS	non-TRA
immature_vs_Aire_KO	ENSMUSG00000014599	0.135	A3SS	non-TRA
immature_vs_Aire_KO	ENSMUSG00000021509	-0.303	A3SS	non-Aire TRA
immature_vs_Aire_KO	ENSMUSG00000029701	0.081	A3SS	non-TRA
immature_vs_Aire_KO	ENSMUSG00000042842	0.013	A3SS	non-TRA
immature_vs_Aire_KO	ENSMUSG00000026456	0.146	A3SS	non-TRA
immature_vs_Aire_KO	ENSMUSG00000037461	0.111	A3SS	non-TRA
immature_vs_Aire_KO	ENSMUSG00000051586	0.027	A3SS	non-TRA
immature_vs_Aire_KO	ENSMUSG00000027466	0.064	A3SS	non-TRA
immature_vs_Aire_KO	ENSMUSG00000004110	0.647	A3SS	non-Aire TRA
immature_vs_Aire_KO	ENSMUSG00000044496	0.033	A3SS	non-TRA
immature_vs_Aire_KO	ENSMUSG00000027981	0.176	A3SS	non-TRA
immature_vs_Aire_KO	ENSMUSG00000034656	0.161	A3SS	non-TRA
immature_vs_Aire_KO	ENSMUSG00000007783	-0.893	A3SS	non-TRA
immature_vs_Aire_KO	ENSMUSG00000060538	0.606	A3SS	non-TRA
immature_vs_Aire_KO	ENSMUSG00000033335	0.021	A3SS	non-TRA
immature_vs_Aire_KO	ENSMUSG00000060227	0.027	A3SS	non-TRA
immature_vs_Aire_KO	ENSMUSG00000015937	0.04	A3SS	non-TRA
immature_vs_Aire_KO	ENSMUSG00000024969	0.139	A3SS	non-TRA
immature_vs_Aire_KO	ENSMUSG00000020412	0.044	A3SS	non-TRA
immature_vs_Aire_KO	ENSMUSG00000024833	-0.14	A3SS	non-TRA
immature_vs_Aire_KO	ENSMUSG00000027384	-0.195	A3SS	non-TRA
immature_vs_Aire_KO	ENSMUSG00000006127	0.048	A3SS	non-TRA
immature_vs_Aire_KO	ENSMUSG00000017417	-0.676	A3SS	non-TRA
immature_vs_Aire_KO	ENSMUSG00000032897	0.046	A3SS	non-TRA
immature_vs_Aire_KO	ENSMUSG00000025958	-0.064	A3SS	non-TRA
immature_vs_Aire_KO	ENSMUSG00000067873	0.052	A3SS	non-TRA
immature_vs_Aire_KO	ENSMUSG00000026860	-0.179	A3SS	non-TRA
immature_vs_Aire_KO	ENSMUSG00000027002	0.056	A3SS	non-TRA
immature_vs_Aire_KO	ENSMUSG00000032076	0.473	A3SS	non-TRA
immature_vs_Aire_KO	ENSMUSG00000021772	0.123	A3SS	non-TRA
immature_vs_Aire_KO	ENSMUSG00000051339	0.084	A3SS	non-TRA
immature_vs_Aire_KO	ENSMUSG00000022223	0.101	A3SS	non-TRA
immature_vs_Aire_KO	ENSMUSG00000036022	0.191	A3SS	non-TRA
immature_vs_Aire_KO	ENSMUSG00000061313	0.091	A3SS	non-TRA
immature_vs_Aire_KO	ENSMUSG00000046434	0.141	A3SS	non-TRA
immature_vs_Aire_KO	ENSMUSG00000022570	0.057	A3SS	non-TRA
immature_vs_Aire_KO	ENSMUSG00000033335	0.018	A3SS	non-TRA
immature_vs_Aire_KO	ENSMUSG00000037933	-0.253	A3SS	non-TRA
immature_vs_Aire_KO	ENSMUSG00000061702	0.421	A3SS	non-Aire TRA
immature_vs_Aire_KO	ENSMUSG00000029524	0.165	A3SS	non-TRA
immature_vs_Aire_KO	ENSMUSG00000034265	-0.498	A3SS	non-TRA
immature_vs_Aire_KO	ENSMUSG00000027751	0.213	A3SS	non-TRA
immature_vs_Aire_KO	ENSMUSG00000040296	0.076	A3SS	non-TRA
immature_vs_Aire_KO	ENSMUSG00000031342	0.536	A3SS	non-TRA
immature_vs_Aire_KO	ENSMUSG00000010755	0.096	A3SS	non-TRA
immature_vs_Aire_KO	ENSMUSG00000028360	0.844	A3SS	Aire-regulated TRA
immature_vs_Aire_KO	ENSMUSG00000041238	-0.136	A3SS	non-TRA
immature_vs_Aire_KO	ENSMUSG00000057554	0.022	A3SS	non-TRA
immature_vs_Aire_KO	ENSMUSG00000029422	0.039	A3SS	non-TRA
immature_vs_Aire_KO	ENSMUSG00000031521	0.044	A3SS	non-TRA
immature_vs_Aire_KO	ENSMUSG00000048200	-0.352	A3SS	non-TRA
immature_vs_Aire_KO	ENSMUSG00000015790	0.146	A3SS	non-TRA
immature_vs_Aire_KO	ENSMUSG00000022656	0.229	A3SS	non-TRA
immature_vs_Aire_KO	ENSMUSG00000020734	0.394	A3SS	non-Aire TRA
immature_vs_Aire_KO	ENSMUSG00000028809	0.113	A3SS	non-TRA
immature_vs_Aire_KO	ENSMUSG00000032094	0.146	A3SS	non-Aire TRA
immature_vs_Aire_KO	ENSMUSG00000029263	0.079	A3SS	non-TRA
immature_vs_Aire_KO	ENSMUSG00000026427	0.034	A3SS	non-TRA
immature_vs_Aire_KO	ENSMUSG00000023968	0.129	A3SS	non-Aire TRA
immature_vs_Aire_KO	ENSMUSG00000021022	-0.097	A3SS	non-TRA
immature_vs_Aire_KO	ENSMUSG00000020289	0.07	A3SS	non-TRA
immature_vs_Aire_KO	ENSMUSG00000004319	0.036	A3SS	non-TRA
immature_vs_Aire_KO	ENSMUSG00000038312	0.026	A3SS	non-TRA
immature_vs_Aire_KO	ENSMUSG00000020758	0.035	A3SS	non-TRA
immature_vs_Aire_KO	ENSMUSG00000025357	0.056	A3SS	non-TRA
immature_vs_Aire_KO	ENSMUSG00000045775	0.519	A3SS	non-Aire TRA
immature_vs_Aire_KO	ENSMUSG00000037716	0.234	A3SS	non-Aire TRA
immature_vs_Aire_KO	ENSMUSG00000026254	0.071	A3SS	non-TRA
immature_vs_Aire_KO	ENSMUSG00000026219	0.114	A3SS	non-TRA
immature_vs_Aire_KO	ENSMUSG00000027282	0.856	A3SS	non-TRA
immature_vs_Aire_KO	ENSMUSG00000056608	0.533	A3SS	non-TRA
immature_vs_Aire_KO	ENSMUSG00000037716	0.527	A3SS	non-Aire TRA
immature_vs_Aire_KO	ENSMUSG00000032067	0.083	A3SS	non-TRA
immature_vs_Aire_KO	ENSMUSG00000061313	0.086	A3SS	non-TRA
immature_vs_Aire_KO	ENSMUSG00000022857	-0.572	A3SS	non-Aire TRA
immature_vs_Aire_KO	ENSMUSG00000014852	0.491	A3SS	non-Aire TRA
immature_vs_Aire_KO	ENSMUSG00000003382	0.321	A3SS	non-TRA
immature_vs_Aire_KO	ENSMUSG00000036333	0.05	A3SS	non-TRA
immature_vs_Aire_KO	ENSMUSG00000017781	0.027	A3SS	non-TRA
immature_vs_Aire_KO	ENSMUSG00000043029	-0.52	A3SS	Aire-regulated TRA
immature_vs_Aire_KO	ENSMUSG00000038733	0.029	A3SS	non-TRA
immature_vs_Aire_KO	ENSMUSG00000019261	0.048	A3SS	non-TRA
immature_vs_Aire_KO	ENSMUSG00000018398	-0.142	A3SS	non-TRA
immature_vs_Aire_KO	ENSMUSG00000001173	-0.469	A3SS	non-TRA
immature_vs_Aire_KO	ENSMUSG00000033885	0.032	A3SS	non-TRA
immature_vs_Aire_KO	ENSMUSG00000015092	0.011	A3SS	non-TRA
immature_vs_Aire_KO	ENSMUSG00000029291	0.137	A3SS	non-TRA
immature_vs_Aire_KO	ENSMUSG00000054252	0.245	A3SS	non-TRA
immature_vs_Aire_KO	ENSMUSG00000026860	-0.166	A3SS	non-TRA
immature_vs_Aire_KO	ENSMUSG00000005481	0.052	A3SS	non-TRA
immature_vs_Aire_KO	ENSMUSG00000021371	0.049	A3SS	non-TRA
immature_vs_Aire_KO	ENSMUSG00000058486	-0.088	A3SS	non-TRA
immature_vs_Aire_KO	ENSMUSG00000026103	0.087	A3SS	non-TRA
immature_vs_Aire_KO	ENSMUSG00000038580	0.144	A3SS	non-Aire TRA
immature_vs_Aire_KO	ENSMUSG00000014609	0.432	A3SS	non-Aire TRA
immature_vs_Aire_KO	ENSMUSG00000105518	0.096	A3SS	non-Aire TRA
immature_vs_Aire_KO	ENSMUSG00000029145	0.148	A3SS	non-TRA
immature_vs_Aire_KO	ENSMUSG00000008658	0.039	A3SS	non-Aire TRA
immature_vs_Aire_KO	ENSMUSG00000027397	0.126	A3SS	non-TRA
immature_vs_Aire_KO	ENSMUSG00000073888	0.227	A3SS	non-TRA
immature_vs_Aire_KO	ENSMUSG00000063897	0.371	A3SS	non-TRA
immature_vs_Aire_KO	ENSMUSG00000056851	0.007	A3SS	non-TRA
immature_vs_Aire_KO	ENSMUSG00000027253	0.058	A3SS	non-TRA
immature_vs_Aire_KO	ENSMUSG00000038975	-0.127	A3SS	non-TRA
immature_vs_Aire_KO	ENSMUSG00000061462	0.391	A3SS	non-Aire TRA
immature_vs_Aire_KO	ENSMUSG00000078173	-0.093	A3SS	non-Aire TRA
immature_vs_Aire_KO	ENSMUSG00000029629	0.524	A3SS	non-TRA
immature_vs_Aire_KO	ENSMUSG00000058022	0.503	A3SS	non-TRA
immature_vs_Aire_KO	ENSMUSG00000040446	0.2	A3SS	non-TRA
immature_vs_Aire_KO	ENSMUSG00000055632	-0.786	A3SS	non-TRA
immature_vs_Aire_KO	ENSMUSG00000040268	0.069	A3SS	non-TRA
immature_vs_Aire_KO	ENSMUSG00000029815	0.04	A3SS	non-TRA
immature_vs_Aire_KO	ENSMUSG00000010651	0.331	A3SS	non-TRA
immature_vs_Aire_KO	ENSMUSG00000032497	0.059	A3SS	non-TRA
immature_vs_Aire_KO	ENSMUSG00000020024	0.072	A3SS	non-TRA
immature_vs_Aire_KO	ENSMUSG00000055491	0.637	A3SS	non-TRA
immature_vs_Aire_KO	ENSMUSG00000018334	0.054	A3SS	non-TRA
immature_vs_Aire_KO	ENSMUSG00000021468	0.01	A3SS	non-TRA
immature_vs_Aire_KO	ENSMUSG00000027829	0.163	A3SS	non-TRA
immature_vs_Aire_KO	ENSMUSG00000033852	-0.34	A3SS	non-TRA
immature_vs_Aire_KO	ENSMUSG00000013787	0.022	A3SS	non-TRA
immature_vs_Aire_KO	ENSMUSG00000014504	0.05	A3SS	non-TRA
immature_vs_Aire_KO	ENSMUSG00000026466	0.026	A3SS	non-TRA
immature_vs_Aire_KO	ENSMUSG00000052512	0.053	A3SS	non-TRA
immature_vs_Aire_KO	ENSMUSG00000055436	0.078	A3SS	non-TRA
immature_vs_Aire_KO	ENSMUSG00000059149	0.416	A3SS	non-TRA
immature_vs_Aire_KO	ENSMUSG00000027180	-0.073	A3SS	non-TRA
immature_vs_Aire_KO	ENSMUSG00000023118	0.036	A3SS	non-TRA
immature_vs_Aire_KO	ENSMUSG00000041654	-0.507	A3SS	non-TRA
immature_vs_Aire_KO	ENSMUSG00000058704	0.054	A3SS	non-TRA
immature_vs_Aire_KO	ENSMUSG00000020361	0.012	A3SS	non-TRA
immature_vs_Aire_KO	ENSMUSG00000035047	0.054	A3SS	non-TRA
immature_vs_Aire_KO	ENSMUSG00000068206	0.145	A3SS	non-TRA
immature_vs_Aire_KO	ENSMUSG00000032579	0.212	A3SS	non-TRA
immature_vs_Aire_KO	ENSMUSG00000030291	0.021	A3SS	non-TRA
immature_vs_Aire_KO	ENSMUSG00000005506	0.16	A3SS	non-TRA
immature_vs_Aire_KO	ENSMUSG00000061950	0.025	A3SS	non-TRA
immature_vs_Aire_KO	ENSMUSG00000026930	0.158	A3SS	non-TRA
immature_vs_Aire_KO	ENSMUSG00000022195	0.057	A3SS	non-TRA
immature_vs_Aire_KO	ENSMUSG00000017697	-0.161	A3SS	non-Aire TRA
immature_vs_Aire_KO	ENSMUSG00000017679	0.144	A3SS	non-TRA
immature_vs_Aire_KO	ENSMUSG00000001017	0.135	A3SS	non-TRA
immature_vs_Aire_KO	ENSMUSG00000022075	0.609	A3SS	non-TRA
immature_vs_Aire_KO	ENSMUSG00000032386	0.027	A3SS	non-TRA
immature_vs_Aire_KO	ENSMUSG00000003452	-0.42	A3SS	non-Aire TRA
immature_vs_Aire_KO	ENSMUSG00000012819	0.942	A3SS	non-Aire TRA
immature_vs_Aire_KO	ENSMUSG00000024045	0.113	A3SS	non-TRA
immature_vs_Aire_KO	ENSMUSG00000021327	0.06	A3SS	non-TRA
immature_vs_Aire_KO	ENSMUSG00000031112	0.035	A3SS	non-TRA
immature_vs_Aire_KO	ENSMUSG00000030002	0.093	A3SS	non-TRA
immature_vs_Aire_KO	ENSMUSG00000009941	-0.379	A3SS	non-Aire TRA
immature_vs_Aire_KO	ENSMUSG00000024442	0.06	A3SS	non-TRA
immature_vs_Aire_KO	ENSMUSG00000028896	0.117	A3SS	non-TRA
immature_vs_Aire_KO	ENSMUSG00000063011	0.035	A3SS	non-Aire TRA
immature_vs_Aire_KO	ENSMUSG00000028411	-0.179	A3SS	non-TRA
immature_vs_Aire_KO	ENSMUSG00000022565	-0.41	A3SS	non-TRA
immature_vs_Aire_KO	ENSMUSG00000036989	0.118	A3SS	non-TRA
immature_vs_Aire_KO	ENSMUSG00000029394	0.082	A3SS	non-TRA
immature_vs_Aire_KO	ENSMUSG00000034290	0.038	A3SS	non-TRA
immature_vs_Aire_KO	ENSMUSG00000068758	0.414	A3SS	non-TRA
immature_vs_Aire_KO	ENSMUSG00000025533	0.022	A3SS	non-TRA
immature_vs_Aire_KO	ENSMUSG00000056820	0.03	A3SS	non-TRA
immature_vs_Aire_KO	ENSMUSG00000074344	-0.308	A3SS	non-Aire TRA
immature_vs_Aire_KO	ENSMUSG00000027569	0.221	A3SS	non-TRA
immature_vs_Aire_KO	ENSMUSG00000019373	0.059	A3SS	non-TRA
immature_vs_Aire_KO	ENSMUSG00000024095	0.053	A3SS	non-TRA
immature_vs_Aire_KO	ENSMUSG00000055436	0.032	A3SS	non-TRA
immature_vs_Aire_KO	ENSMUSG00000026153	0.18	A3SS	non-TRA
immature_vs_Aire_KO	ENSMUSG00000036856	0.373	A3SS	non-TRA
immature_vs_Aire_KO	ENSMUSG00000045094	-0.343	A3SS	non-TRA
immature_vs_Aire_KO	ENSMUSG00000022427	0.041	A3SS	non-TRA
immature_vs_Aire_KO	ENSMUSG00000022075	-0.342	A3SS	non-TRA
immature_vs_Aire_KO	ENSMUSG00000027177	0.025	A3SS	non-TRA
immature_vs_Aire_KO	ENSMUSG00000041360	0.017	A3SS	non-TRA
immature_vs_Aire_KO	ENSMUSG00000001025	-0.446	A3SS	non-TRA
immature_vs_Aire_KO	ENSMUSG00000015143	-0.188	A3SS	non-TRA
immature_vs_Aire_KO	ENSMUSG00000027751	0.214	A3SS	non-TRA
immature_vs_Aire_KO	ENSMUSG00000046605	-0.128	A3SS	non-TRA
immature_vs_Aire_KO	ENSMUSG00000032534	0.032	A3SS	non-TRA
immature_vs_Aire_KO	ENSMUSG00000042359	-0.49	A3SS	non-TRA
immature_vs_Aire_KO	ENSMUSG00000007035	-0.36	A3SS	non-TRA
immature_vs_Aire_KO	ENSMUSG00000024055	0.086	A3SS	non-TRA
immature_vs_Aire_KO	ENSMUSG00000067567	0.037	A3SS	non-TRA
immature_vs_Aire_KO	ENSMUSG00000019889	0.024	A3SS	non-TRA
immature_vs_Aire_KO	ENSMUSG00000013483	-0.195	A3SS	Aire-regulated TRA
immature_vs_Aire_KO	ENSMUSG00000029352	-0.256	A3SS	non-TRA
immature_vs_Aire_KO	ENSMUSG00000042249	0.227	A3SS	non-TRA
immature_vs_Aire_KO	ENSMUSG00000067942	0.126	A3SS	non-TRA
immature_vs_Aire_KO	ENSMUSG00000020096	0.246	A3SS	non-Aire TRA
immature_vs_Aire_KO	ENSMUSG00000020691	0.043	A3SS	non-TRA
immature_vs_Aire_KO	ENSMUSG00000069135	0.093	A3SS	non-TRA
immature_vs_Aire_KO	ENSMUSG00000078490	-0.312	A3SS	non-Aire TRA
immature_vs_Aire_KO	ENSMUSG00000024340	0.482	A3SS	non-Aire TRA
immature_vs_Aire_KO	ENSMUSG00000022961	0.074	A3SS	non-TRA
immature_vs_Aire_KO	ENSMUSG00000042359	0.047	A3SS	non-TRA
immature_vs_Aire_KO	ENSMUSG00000012422	0.017	A3SS	non-TRA
immature_vs_Aire_KO	ENSMUSG00000026017	0.428	A3SS	non-TRA
immature_vs_Aire_KO	ENSMUSG00000028613	-0.374	A3SS	non-TRA
immature_vs_Aire_KO	ENSMUSG00000052299	0.1	A3SS	non-TRA
immature_vs_Aire_KO	ENSMUSG00000109446	0.117	A3SS	non-Aire TRA
immature_vs_Aire_KO	ENSMUSG00000040506	0.053	A3SS	non-TRA
immature_vs_Aire_KO	ENSMUSG00000039233	0.125	A3SS	non-TRA
immature_vs_Aire_KO	ENSMUSG00000049550	0.009	A3SS	non-TRA
immature_vs_Aire_KO	ENSMUSG00000008855	-0.311	A3SS	non-TRA
immature_vs_Aire_KO	ENSMUSG00000026576	0.018	A3SS	non-TRA
immature_vs_Aire_KO	ENSMUSG00000020128	0.184	A3SS	non-TRA
immature_vs_Aire_KO	ENSMUSG00000061751	-0.114	A3SS	non-TRA
immature_vs_Aire_KO	ENSMUSG00000042770	0.042	A3SS	non-TRA
immature_vs_Aire_KO	ENSMUSG00000040495	0.543	A3SS	non-Aire TRA
immature_vs_Aire_KO	ENSMUSG00000035067	0.166	A3SS	non-TRA
immature_vs_Aire_KO	ENSMUSG00000019302	-0.138	A3SS	non-TRA
immature_vs_Aire_KO	ENSMUSG00000054072	0.155	A3SS	non-Aire TRA
immature_vs_Aire_KO	ENSMUSG00000027942	0.058	A3SS	non-TRA
immature_vs_Aire_KO	ENSMUSG00000064246	0.056	A3SS	Aire-regulated TRA
immature_vs_Aire_KO	ENSMUSG00000033470	0.052	A3SS	non-Aire TRA
immature_vs_Aire_KO	ENSMUSG00000024160	-0.079	A3SS	non-TRA
immature_vs_Aire_KO	ENSMUSG00000006498	0.022	A3SS	non-TRA
immature_vs_Aire_KO	ENSMUSG00000020682	-0.226	A3SS	non-TRA
immature_vs_Aire_KO	ENSMUSG00000040850	0.052	A3SS	non-TRA
immature_vs_Aire_KO	ENSMUSG00000020740	-0.101	A3SS	non-TRA
immature_vs_Aire_KO	ENSMUSG00000009995	0.147	A3SS	non-TRA
immature_vs_Aire_KO	ENSMUSG00000016495	-0.206	A3SS	non-TRA
immature_vs_Aire_KO	ENSMUSG00000028552	0.02	A3SS	non-TRA
immature_vs_Aire_KO	ENSMUSG00000091712	-0.124	A3SS	non-Aire TRA
immature_vs_Aire_KO	ENSMUSG00000029512	0.144	A3SS	non-TRA
immature_vs_Aire_KO	ENSMUSG00000022089	0.021	A3SS	non-TRA
immature_vs_Aire_KO	ENSMUSG00000028180	0.076	A3SS	non-TRA
immature_vs_Aire_KO	ENSMUSG00000041481	0.047	A3SS	non-TRA
immature_vs_Aire_KO	ENSMUSG00000033335	0.173	A3SS	non-TRA
immature_vs_Aire_KO	ENSMUSG00000020167	-0.048	A3SS	non-TRA
immature_vs_Aire_KO	ENSMUSG00000025437	0.029	A3SS	non-TRA
immature_vs_Aire_KO	ENSMUSG00000029209	0.04	A3SS	non-TRA
immature_vs_Aire_KO	ENSMUSG00000036403	-0.133	A3SS	non-TRA
immature_vs_Aire_KO	ENSMUSG00000039826	0.133	A3SS	non-TRA
immature_vs_Aire_KO	ENSMUSG00000039542	0.01	A3SS	non-TRA
immature_vs_Aire_KO	ENSMUSG00000045917	0.566	A3SS	non-TRA
immature_vs_Aire_KO	ENSMUSG00000063698	0.274	A3SS	non-TRA
immature_vs_Aire_KO	ENSMUSG00000031691	0.041	A3SS	non-TRA
immature_vs_Aire_KO	ENSMUSG00000002210	0.03	A3SS	non-TRA
immature_vs_Aire_KO	ENSMUSG00000033149	0.114	A3SS	non-TRA
immature_vs_Aire_KO	ENSMUSG00000037989	0.137	A3SS	non-TRA
immature_vs_Aire_KO	ENSMUSG00000024392	0.164	A3SS	non-TRA
immature_vs_Aire_KO	ENSMUSG00000067629	0.607	A3SS	non-TRA
immature_vs_Aire_KO	ENSMUSG00000026950	0.885	A3SS	non-Aire TRA
immature_vs_Aire_KO	ENSMUSG00000022783	-0.169	A3SS	non-Aire TRA
immature_vs_Aire_KO	ENSMUSG00000036617	-0.136	A3SS	non-TRA
immature_vs_Aire_KO	ENSMUSG00000026193	-0.157	A3SS	non-TRA
immature_vs_Aire_KO	ENSMUSG00000027071	0.37	A3SS	non-Aire TRA
immature_vs_Aire_KO	ENSMUSG00000057378	0.265	A3SS	non-TRA
immature_vs_Aire_KO	ENSMUSG00000040263	0.049	A3SS	non-TRA
immature_vs_Aire_KO	ENSMUSG00000027291	0.036	A3SS	non-TRA
immature_vs_Aire_KO	ENSMUSG00000074358	0.163	A3SS	non-TRA
immature_vs_Aire_KO	ENSMUSG00000027901	0.059	A3SS	non-TRA
immature_vs_Aire_KO	ENSMUSG00000093910	-0.328	A3SS	non-Aire TRA
immature_vs_Aire_KO	ENSMUSG00000046971	0.317	A3SS	Aire-regulated TRA
immature_vs_Aire_KO	ENSMUSG00000039193	0.282	A3SS	non-Aire TRA
immature_vs_Aire_KO	ENSMUSG00000034930	0.033	A3SS	non-TRA
immature_vs_Aire_KO	ENSMUSG00000069565	0.248	A3SS	non-TRA
immature_vs_Aire_KO	ENSMUSG00000031166	0.152	A3SS	non-TRA
immature_vs_Aire_KO	ENSMUSG00000020527	0.079	A3SS	non-TRA
immature_vs_Aire_KO	ENSMUSG00000031641	0.593	A3SS	non-TRA
immature_vs_Aire_KO	ENSMUSG00000021027	0.018	A3SS	non-TRA
immature_vs_Aire_KO	ENSMUSG00000030231	-0.295	A3SS	non-TRA
immature_vs_Aire_KO	ENSMUSG00000035268	0.012	A3SS	non-TRA
immature_vs_Aire_KO	ENSMUSG00000003068	0.035	A3SS	non-TRA
immature_vs_Aire_KO	ENSMUSG00000024937	0.474	A3SS	non-TRA
immature_vs_Aire_KO	ENSMUSG00000049659	0.246	A3SS	non-TRA
immature_vs_Aire_KO	ENSMUSG00000031982	-0.36	A3SS	non-TRA
immature_vs_Aire_KO	ENSMUSG00000059363	0.055	A3SS	non-TRA
immature_vs_Aire_KO	ENSMUSG00000040351	-0.167	A3SS	non-TRA
immature_vs_Aire_KO	ENSMUSG00000007036	0.039	A3SS	non-TRA
immature_vs_Aire_KO	ENSMUSG00000037461	0.096	A3SS	non-TRA
immature_vs_Aire_KO	ENSMUSG00000109446	-0.31	A3SS	non-Aire TRA
immature_vs_Aire_KO	ENSMUSG00000035674	-0.047	A3SS	non-TRA
immature_vs_Aire_KO	ENSMUSG00000019715	0.037	A3SS	non-TRA
immature_vs_Aire_KO	ENSMUSG00000028399	-0.074	A3SS	non-TRA
immature_vs_Aire_KO	ENSMUSG00000016496	0.061	A3SS	non-TRA
immature_vs_Aire_KO	ENSMUSG00000032583	0.092	A3SS	non-TRA
immature_vs_Aire_KO	ENSMUSG00000042256	0.623	A3SS	non-Aire TRA
immature_vs_Aire_KO	ENSMUSG00000028973	0.028	A3SS	non-TRA
immature_vs_Aire_KO	ENSMUSG00000021287	0.177	A3SS	non-TRA
immature_vs_Aire_KO	ENSMUSG00000060791	0.077	A3SS	non-TRA
immature_vs_Aire_KO	ENSMUSG00000028256	0.066	A3SS	non-TRA
immature_vs_Aire_KO	ENSMUSG00000084957	0.042	A3SS	non-TRA
immature_vs_Aire_KO	ENSMUSG00000041538	0.095	A3SS	non-Aire TRA
immature_vs_Aire_KO	ENSMUSG00000037418	0.307	A3SS	Aire-regulated TRA
immature_vs_Aire_KO	ENSMUSG00000037652	0.124	A3SS	non-TRA
immature_vs_Aire_KO	ENSMUSG00000072501	0.136	A3SS	non-TRA
immature_vs_Aire_KO	ENSMUSG00000061689	0.074	A3SS	non-TRA
immature_vs_Aire_KO	ENSMUSG00000035770	0.021	A3SS	non-TRA
immature_vs_Aire_KO	ENSMUSG00000027540	0.067	A3SS	non-TRA
immature_vs_Aire_KO	ENSMUSG00000029169	0.07	A3SS	non-TRA
immature_vs_Aire_KO	ENSMUSG00000024937	0.467	A3SS	non-TRA
immature_vs_Aire_KO	ENSMUSG00000022387	0.011	A3SS	non-TRA
immature_vs_Aire_KO	ENSMUSG00000042744	-0.345	A3SS	non-TRA
immature_vs_Aire_KO	ENSMUSG00000025236	0.111	A3SS	non-TRA
immature_vs_Aire_KO	ENSMUSG00000028158	-0.243	A3SS	non-TRA
immature_vs_Aire_KO	ENSMUSG00000022098	-0.059	A3SS	non-TRA
immature_vs_Aire_KO	ENSMUSG00000025558	0.083	A3SS	non-TRA
immature_vs_Aire_KO	ENSMUSG00000033540	-0.115	A3SS	non-TRA
immature_vs_Aire_KO	ENSMUSG00000048440	0.064	A3SS	non-TRA
immature_vs_Aire_KO	ENSMUSG00000042662	-0.212	A3SS	non-Aire TRA
immature_vs_Aire_KO	ENSMUSG00000006958	0.235	A3SS	non-TRA
immature_vs_Aire_KO	ENSMUSG00000024454	0.064	A3SS	non-TRA
immature_vs_Aire_KO	ENSMUSG00000029106	0.011	A3SS	non-TRA
immature_vs_Aire_KO	ENSMUSG00000019948	0.093	A3SS	non-TRA
immature_vs_Aire_KO	ENSMUSG00000014778	0.183	A3SS	non-TRA
immature_vs_Aire_KO	ENSMUSG00000026483	0.013	A3SS	non-TRA
immature_vs_Aire_KO	ENSMUSG00000023072	0.105	A3SS	non-TRA
immature_vs_Aire_KO	ENSMUSG00000042198	0.075	A3SS	non-TRA
immature_vs_Aire_KO	ENSMUSG00000033629	0.019	A3SS	non-TRA
immature_vs_Aire_KO	ENSMUSG00000031441	-0.083	A3SS	non-TRA
immature_vs_Aire_KO	ENSMUSG00000024944	0.022	A3SS	non-TRA
immature_vs_Aire_KO	ENSMUSG00000035505	0.226	A3SS	non-TRA
immature_vs_Aire_KO	ENSMUSG00000028582	-0.052	A3SS	non-TRA
immature_vs_Aire_KO	ENSMUSG00000037876	0.181	A3SS	non-TRA
immature_vs_Aire_KO	ENSMUSG00000042055	0.056	A3SS	non-TRA
immature_vs_Aire_KO	ENSMUSG00000040312	0.138	A3SS	non-Aire TRA
immature_vs_Aire_KO	ENSMUSG00000037716	0.2	A3SS	non-Aire TRA
immature_vs_Aire_KO	ENSMUSG00000019907	0.011	A3SS	non-TRA
immature_vs_Aire_KO	ENSMUSG00000035649	0.142	A3SS	non-TRA
immature_vs_Aire_KO	ENSMUSG00000035649	0.141	A3SS	non-TRA
immature_vs_Aire_KO	ENSMUSG00000056917	0.396	A3SS	non-TRA
immature_vs_Aire_KO	ENSMUSG00000005681	0.214	A3SS	Aire-regulated TRA
immature_vs_Aire_KO	ENSMUSG00000038520	-0.05	A3SS	non-TRA
immature_vs_Aire_KO	ENSMUSG00000028245	0.065	A3SS	non-TRA
immature_vs_Aire_KO	ENSMUSG00000006344	0.063	A3SS	non-TRA
immature_vs_Aire_KO	ENSMUSG00000039199	0.45	A3SS	non-TRA
immature_vs_Aire_KO	ENSMUSG00000056328	-0.291	A3SS	non-Aire TRA
immature_vs_Aire_KO	ENSMUSG00000032519	0.322	A3SS	non-TRA
immature_vs_Aire_KO	ENSMUSG00000038508	0.175	A3SS	non-Aire TRA
immature_vs_Aire_KO	ENSMUSG00000020734	0.129	A3SS	non-Aire TRA
immature_vs_Aire_KO	ENSMUSG00000018899	0.092	A3SS	non-TRA
immature_vs_Aire_KO	ENSMUSG00000073771	0.585	A3SS	non-TRA
immature_vs_Aire_KO	ENSMUSG00000063704	-0.186	A3SS	Aire-regulated TRA
immature_vs_Aire_KO	ENSMUSG00000041459	0.118	A3SS	non-TRA
immature_vs_Aire_KO	ENSMUSG00000025279	0.202	A3SS	non-TRA
immature_vs_Aire_KO	ENSMUSG00000031969	0.145	A3SS	non-TRA
immature_vs_Aire_KO	ENSMUSG00000009585	0.083	A3SS	non-TRA
immature_vs_Aire_KO	ENSMUSG00000015143	-0.154	A3SS	non-TRA
immature_vs_Aire_KO	ENSMUSG00000029389	0.103	A3SS	non-TRA
immature_vs_Aire_KO	ENSMUSG00000018761	0.065	A3SS	non-TRA
immature_vs_Aire_KO	ENSMUSG00000028837	0.012	A3SS	non-TRA
immature_vs_Aire_KO	ENSMUSG00000005262	0.034	A3SS	non-TRA
immature_vs_Aire_KO	ENSMUSG00000009585	0.082	A3SS	non-TRA
immature_vs_Aire_KO	ENSMUSG00000025856	0.05	A3SS	non-TRA
immature_vs_Aire_KO	ENSMUSG00000005899	0.205	A3SS	non-TRA
immature_vs_Aire_KO	ENSMUSG00000028957	0.827	A3SS	non-TRA
immature_vs_Aire_KO	ENSMUSG00000035227	0.009	A3SS	non-TRA
immature_vs_Aire_KO	ENSMUSG00000009739	0.162	A3SS	non-TRA
immature_vs_Aire_KO	ENSMUSG00000020167	-0.374	A3SS	non-TRA
immature_vs_Aire_KO	ENSMUSG00000071202	-0.619	A3SS	Aire-regulated TRA
immature_vs_Aire_KO	ENSMUSG00000055817	0.044	A3SS	non-TRA
immature_vs_Aire_KO	ENSMUSG00000017652	0.048	A3SS	non-TRA
immature_vs_Aire_KO	ENSMUSG00000021198	-0.278	A3SS	non-Aire TRA
immature_vs_Aire_KO	ENSMUSG00000058886	0.415	A3SS	non-TRA
immature_vs_Aire_KO	ENSMUSG00000020888	0.056	A3SS	non-TRA
immature_vs_Aire_KO	ENSMUSG00000040247	0.182	A3SS	non-Aire TRA
immature_vs_Aire_KO	ENSMUSG00000027072	-0.183	A3SS	non-Aire TRA
immature_vs_Aire_KO	ENSMUSG00000052087	0.189	A3SS	non-Aire TRA
immature_vs_Aire_KO	ENSMUSG00000035620	0.11	A3SS	non-TRA
immature_vs_Aire_KO	ENSMUSG00000025858	0.023	A3SS	non-TRA
immature_vs_Aire_KO	ENSMUSG00000001065	0.112	A3SS	non-TRA
immature_vs_Aire_KO	ENSMUSG00000030603	0.01	A3SS	non-TRA
immature_vs_Aire_KO	ENSMUSG00000022858	0.064	A3SS	non-TRA
immature_vs_Aire_KO	ENSMUSG00000003778	0.101	A3SS	non-TRA
immature_vs_Aire_KO	ENSMUSG00000029817	0.085	A3SS	non-TRA
immature_vs_Aire_KO	ENSMUSG00000027346	0.042	A3SS	non-TRA
immature_vs_Aire_KO	ENSMUSG00000048677	-0.199	A3SS	non-TRA
immature_vs_Aire_KO	ENSMUSG00000053441	-0.234	A3SS	Aire-regulated TRA
immature_vs_Aire_KO	ENSMUSG00000000339	0.072	A3SS	non-TRA
immature_vs_Aire_KO	ENSMUSG00000020527	0.07	A3SS	non-TRA
immature_vs_Aire_KO	ENSMUSG00000029061	0.143	A3SS	non-TRA
immature_vs_Aire_KO	ENSMUSG00000056962	0.232	A3SS	non-TRA
immature_vs_Aire_KO	ENSMUSG00000000538	0.056	A3SS	non-TRA
immature_vs_Aire_KO	ENSMUSG00000028402	-0.321	A3SS	non-TRA
immature_vs_Aire_KO	ENSMUSG00000030678	0.038	A3SS	non-TRA
immature_vs_Aire_KO	ENSMUSG00000029617	0.014	A3SS	non-TRA
immature_vs_Aire_KO	ENSMUSG00000040297	0.068	A3SS	non-TRA
immature_vs_Aire_KO	ENSMUSG00000039754	0.18	A3SS	non-TRA
immature_vs_Aire_KO	ENSMUSG00000033857	0.066	A3SS	non-TRA
immature_vs_Aire_KO	ENSMUSG00000060450	0.283	A3SS	non-TRA
immature_vs_Aire_KO	ENSMUSG00000026433	0.023	A3SS	non-TRA
immature_vs_Aire_KO	ENSMUSG00000026153	0.081	A3SS	non-TRA
immature_vs_Aire_KO	ENSMUSG00000071302	0.198	A3SS	non-TRA
immature_vs_Aire_KO	ENSMUSG00000030555	-0.133	A3SS	non-TRA
immature_vs_Aire_KO	ENSMUSG00000063704	-0.166	A3SS	Aire-regulated TRA
immature_vs_Aire_KO	ENSMUSG00000015942	-0.412	A3SS	non-TRA
immature_vs_Aire_KO	ENSMUSG00000025473	0.047	A3SS	non-TRA
immature_vs_Aire_KO	ENSMUSG00000020523	-0.333	A3SS	non-TRA
immature_vs_Aire_KO	ENSMUSG00000025270	0.142	A3SS	non-TRA
immature_vs_Aire_KO	ENSMUSG00000004561	0.126	A3SS	non-TRA
immature_vs_Aire_KO	ENSMUSG00000031807	0.015	A3SS	non-TRA
immature_vs_Aire_KO	ENSMUSG00000032525	0.158	A3SS	non-TRA
immature_vs_Aire_KO	ENSMUSG00000002395	0.028	A3SS	non-TRA
immature_vs_Aire_KO	ENSMUSG00000024921	0.134	A3SS	non-TRA
immature_vs_Aire_KO	ENSMUSG00000046836	0.048	A3SS	non-TRA
immature_vs_Aire_KO	ENSMUSG00000030826	0.076	A3SS	non-TRA
immature_vs_Aire_KO	ENSMUSG00000041757	0.115	A3SS	non-TRA
immature_vs_Aire_KO	ENSMUSG00000047789	0.142	A3SS	non-TRA
immature_vs_Aire_KO	ENSMUSG00000031328	-0.302	A3SS	non-TRA
immature_vs_Aire_KO	ENSMUSG00000025558	0.157	A3SS	non-TRA
immature_vs_Aire_KO	ENSMUSG00000032558	0.094	A3SS	non-TRA
immature_vs_Aire_KO	ENSMUSG00000031098	-0.351	A3SS	Aire-regulated TRA
immature_vs_Aire_KO	ENSMUSG00000063704	-0.154	A3SS	Aire-regulated TRA
immature_vs_Aire_KO	ENSMUSG00000002395	0.026	A3SS	non-TRA
immature_vs_Aire_KO	ENSMUSG00000033075	-0.059	A3SS	non-TRA
immature_vs_Aire_KO	ENSMUSG00000032366	0.04	A3SS	non-TRA
immature_vs_Aire_KO	ENSMUSG00000022359	0.136	A3SS	non-TRA
immature_vs_Aire_KO	ENSMUSG00000105204	0.013	A3SS	non-TRA
immature_vs_Aire_KO	ENSMUSG00000061887	0.034	A3SS	non-TRA
immature_vs_Aire_KO	ENSMUSG00000021591	0.055	A3SS	non-TRA
immature_vs_Aire_KO	ENSMUSG00000034032	0.034	A3SS	non-TRA
immature_vs_Aire_KO	ENSMUSG00000027575	0.042	A3SS	non-TRA
immature_vs_Aire_KO	ENSMUSG00000056458	0.149	A3SS	non-Aire TRA
immature_vs_Aire_KO	ENSMUSG00000021703	0.037	A3SS	non-TRA
immature_vs_Aire_KO	ENSMUSG00000045095	-0.14	A3SS	non-TRA
immature_vs_Aire_KO	ENSMUSG00000006576	0.274	A3SS	non-TRA
immature_vs_Aire_KO	ENSMUSG00000026766	0.085	A3SS	non-TRA
immature_vs_Aire_KO	ENSMUSG00000058886	0.401	A3SS	non-TRA
immature_vs_Aire_KO	ENSMUSG00000023206	0.142	A3SS	non-TRA
immature_vs_Aire_KO	ENSMUSG00000026193	-0.147	A3SS	non-TRA
immature_vs_Aire_KO	ENSMUSG00000040220	-0.363	A3SS	non-TRA
immature_vs_Aire_KO	ENSMUSG00000028745	0.008	A3SS	non-TRA
immature_vs_Aire_KO	ENSMUSG00000028741	0.047	A3SS	non-TRA
immature_vs_Aire_KO	ENSMUSG00000032621	0.153	A3SS	non-TRA
immature_vs_Aire_KO	ENSMUSG00000022995	-0.044	A3SS	non-TRA
immature_vs_Aire_KO	ENSMUSG00000032558	0.311	A3SS	non-TRA
immature_vs_Aire_KO	ENSMUSG00000040247	0.144	A3SS	non-Aire TRA
immature_vs_Aire_KO	ENSMUSG00000014353	0.218	A3SS	non-TRA
immature_vs_Aire_KO	ENSMUSG00000021706	0.073	A3SS	non-TRA
immature_vs_Aire_KO	ENSMUSG00000015165	0.047	A3SS	non-TRA
immature_vs_Aire_KO	ENSMUSG00000021493	-0.122	A3SS	non-TRA
immature_vs_Aire_KO	ENSMUSG00000037957	0.183	A3SS	non-TRA
immature_vs_Aire_KO	ENSMUSG00000023050	-0.18	A3SS	non-TRA
immature_vs_Aire_KO	ENSMUSG00000009905	0.036	A3SS	non-TRA
immature_vs_Aire_KO	ENSMUSG00000002496	0.168	A3SS	non-TRA
immature_vs_Aire_KO	ENSMUSG00000005611	0.539	A3SS	non-TRA
immature_vs_Aire_KO	ENSMUSG00000006301	0.03	A3SS	non-TRA
immature_vs_Aire_KO	ENSMUSG00000014959	0.124	A3SS	non-TRA
immature_vs_Aire_KO	ENSMUSG00000030806	0.179	A3SS	non-Aire TRA
immature_vs_Aire_KO	ENSMUSG00000047798	-0.316	A3SS	Aire-regulated TRA
immature_vs_Aire_KO	ENSMUSG00000031842	0.177	A3SS	non-TRA
immature_vs_Aire_KO	ENSMUSG00000060166	0.054	A3SS	non-TRA
immature_vs_Aire_KO	ENSMUSG00000041119	0.265	A3SS	non-TRA
immature_vs_Aire_KO	ENSMUSG00000015126	0.122	A3SS	non-TRA
immature_vs_Aire_KO	ENSMUSG00000089824	0.176	A3SS	non-TRA
immature_vs_Aire_KO	ENSMUSG00000032175	0.183	A3SS	non-TRA
immature_vs_Aire_KO	ENSMUSG00000000538	0.048	A3SS	non-TRA
immature_vs_Aire_KO	ENSMUSG00000025006	0.063	A3SS	non-TRA
immature_vs_Aire_KO	ENSMUSG00000028085	0.06	A3SS	non-TRA
immature_vs_Aire_KO	ENSMUSG00000030982	0.014	A3SS	non-TRA
immature_vs_Aire_KO	ENSMUSG00000025474	0.039	A3SS	non-TRA
immature_vs_Aire_KO	ENSMUSG00000027358	0.108	A3SS	non-TRA
immature_vs_Aire_KO	ENSMUSG00000027272	0.294	A3SS	non-TRA
immature_vs_Aire_KO	ENSMUSG00000059119	0.14	A3SS	non-TRA
immature_vs_Aire_KO	ENSMUSG00000024940	-0.115	A3SS	non-TRA
immature_vs_Aire_KO	ENSMUSG00000036502	0.501	A3SS	non-TRA
immature_vs_Aire_KO	ENSMUSG00000022023	-0.099	A3SS	non-TRA
immature_vs_Aire_KO	ENSMUSG00000041538	0.039	A3SS	non-Aire TRA
immature_vs_Aire_KO	ENSMUSG00000050908	-0.488	A3SS	non-Aire TRA
immature_vs_Aire_KO	ENSMUSG00000024097	0.085	A3SS	non-TRA
immature_vs_Aire_KO	ENSMUSG00000030811	0.033	A3SS	non-TRA
immature_vs_Aire_KO	ENSMUSG00000053291	0.039	A3SS	non-TRA
immature_vs_Aire_KO	ENSMUSG00000028580	-0.075	A3SS	non-TRA
immature_vs_Aire_KO	ENSMUSG00000060510	0.162	A3SS	non-TRA
immature_vs_Aire_KO	ENSMUSG00000020614	0.367	A3SS	non-TRA
immature_vs_Aire_KO	ENSMUSG00000037339	-0.177	A3SS	non-TRA
immature_vs_Aire_KO	ENSMUSG00000038102	0.027	A3SS	non-TRA
immature_vs_Aire_KO	ENSMUSG00000037364	0.135	A3SS	non-TRA
immature_vs_Aire_KO	ENSMUSG00000024483	0.068	A3SS	non-TRA
immature_vs_Aire_KO	ENSMUSG00000039943	0.123	A3SS	non-TRA
immature_vs_Aire_KO	ENSMUSG00000038371	0.249	A3SS	non-TRA
immature_vs_Aire_KO	ENSMUSG00000026279	-0.012	A3SS	non-TRA
immature_vs_Aire_KO	ENSMUSG00000024940	0.118	A3SS	non-TRA
immature_vs_Aire_KO	ENSMUSG00000025558	0.192	A3SS	non-TRA
immature_vs_Aire_KO	ENSMUSG00000029408	-0.232	A3SS	non-TRA
immature_vs_Aire_KO	ENSMUSG00000004113	0.056	A3SS	non-Aire TRA
immature_vs_Aire_KO	ENSMUSG00000039354	0.041	A3SS	non-TRA
immature_vs_Aire_KO	ENSMUSG00000041949	-0.101	A3SS	non-TRA
immature_vs_Aire_KO	ENSMUSG00000034579	0.095	A3SS	non-Aire TRA
immature_vs_Aire_KO	ENSMUSG00000045983	0.016	A3SS	non-TRA
immature_vs_Aire_KO	ENSMUSG00000028917	0.075	A3SS	non-TRA
immature_vs_Aire_KO	ENSMUSG00000039252	-0.137	A3SS	non-Aire TRA
immature_vs_Aire_KO	ENSMUSG00000030739	0.028	A3SS	non-TRA
immature_vs_Aire_KO	ENSMUSG00000016024	0.041	A3SS	non-TRA
immature_vs_Aire_KO	ENSMUSG00000001986	0.145	A3SS	non-TRA
immature_vs_Aire_KO	ENSMUSG00000028256	0.05	A3SS	non-TRA
immature_vs_Aire_KO	ENSMUSG00000025647	-0.131	A3SS	non-TRA
immature_vs_Aire_KO	ENSMUSG00000041654	0.552	A3SS	non-TRA
immature_vs_Aire_KO	ENSMUSG00000032698	0.044	A3SS	non-TRA
immature_vs_Aire_KO	ENSMUSG00000035674	0.013	A3SS	non-TRA
immature_vs_Aire_KO	ENSMUSG00000020734	-0.056	A3SS	non-Aire TRA
immature_vs_Aire_KO	ENSMUSG00000021975	0.027	A3SS	non-TRA
immature_vs_Aire_KO	ENSMUSG00000007817	-0.356	A3SS	non-TRA
immature_vs_Aire_KO	ENSMUSG00000028464	0.105	A3SS	non-TRA
immature_vs_Aire_KO	ENSMUSG00000028841	0.093	A3SS	non-TRA
immature_vs_Aire_KO	ENSMUSG00000029162	0.098	A3SS	non-TRA
immature_vs_Aire_KO	ENSMUSG00000032557	0.033	A3SS	non-TRA
immature_vs_Aire_KO	ENSMUSG00000021431	0.13	A3SS	non-TRA
immature_vs_Aire_KO	ENSMUSG00000026921	0.506	A3SS	non-TRA
immature_vs_Aire_KO	ENSMUSG00000024958	-0.05	A3SS	non-TRA
immature_vs_Aire_KO	ENSMUSG00000022091	0.09	A3SS	non-TRA
immature_vs_Aire_KO	ENSMUSG00000037761	-0.108	A3SS	non-TRA
immature_vs_Aire_KO	ENSMUSG00000091754	0.172	A3SS	non-Aire TRA
immature_vs_Aire_KO	ENSMUSG00000025086	0.117	A3SS	non-TRA
immature_vs_Aire_KO	ENSMUSG00000070495	-0.123	A3SS	non-Aire TRA
immature_vs_Aire_KO	ENSMUSG00000022995	0.213	A3SS	non-TRA
immature_vs_Aire_KO	ENSMUSG00000031662	0.107	A3SS	non-TRA
immature_vs_Aire_KO	ENSMUSG00000024560	-0.04	A3SS	non-TRA
immature_vs_Aire_KO	ENSMUSG00000027997	0.036	A3SS	non-TRA
immature_vs_Aire_KO	ENSMUSG00000025872	0.07	A3SS	non-TRA
immature_vs_Aire_KO	ENSMUSG00000034278	0.336	A3SS	non-TRA
[truncated: 18,989 more rows]

## Sheet: Supp. Table 6
transcript_id	pval	qval	b	mean_obs
ENSMUST00000131028	0	0	2.57893	8.23967
ENSMUST00000048762	6.14e-226	2.21e-221	3.23095	6.92551
ENSMUST00000108689	1.69e-220	4.06e-216	8.07097	3.35254
ENSMUST00000023710	5.14e-143	9.25e-139	2.34585	6.53805
ENSMUST00000024993	3.94e-141	5.68e-137	7.62899	3.12135
ENSMUST00000096904	1.75e-135	2.1e-131	2.79376	6.26114
ENSMUST00000023720	4.54e-132	4.67e-128	2.12878	6.65468
ENSMUST00000128241	1.34e-131	1.21e-127	2.84835	7.25325
ENSMUST00000023260	2.56e-129	2.05e-125	2.55977	6.17632
ENSMUST00000037453	1.39e-117	1e-113	7.44886	3.03128
ENSMUST00000024827	2.05e-115	1.34e-111	2.98552	5.72491
ENSMUST00000004774	6.54e-115	3.92e-111	3.29116	5.43212
ENSMUST00000103131	5.77e-112	3.19e-108	1.5901	7.41044
ENSMUST00000073554	2.78e-106	1.43e-102	7.35274	2.98322
ENSMUST00000087996	1.79e-105	8.57e-102	1.31654	8.16672
ENSMUST00000028985	5.2e-103	2.34e-99	1.42384	7.94362
ENSMUST00000028854	8.62e-103	3.65e-99	2.42677	5.99283
ENSMUST00000023790	3.35e-102	1.34e-98	2.15356	6.29171
ENSMUST00000023265	2.17e-101	8.23e-98	4.0488	5.0324
ENSMUST00000038598	4.37e-101	1.57e-97	2.31769	6.47456
ENSMUST00000061739	3.56e-100	1.22e-96	2.41394	5.88174
ENSMUST00000023797	4.04e-100	1.32e-96	3.2185	5.54129
ENSMUST00000208921	8.46e-99	2.64e-95	3.34988	5.3513
ENSMUST00000103157	2.74e-98	8.22e-95	7.29481	2.95426
ENSMUST00000035077	2.83e-97	8.13e-94	2.60673	5.96864
ENSMUST00000082430	5.12e-96	1.42e-92	1.6155	7.0992
ENSMUST00000049644	2.34e-94	6.24e-91	1.94608	6.54799
ENSMUST00000027164	9.77e-94	2.51e-90	-1.4203	7.44523
ENSMUST00000023807	9.26e-90	2.3e-86	1.8772	6.53143
ENSMUST00000059886	1.84e-87	4.42e-84	1.68648	7.2463
ENSMUST00000045902	4.1e-87	9.52e-84	1.61024	6.97188
ENSMUST00000030551	6.53e-87	1.47e-83	2.2468	5.99385
ENSMUST00000005532	4.53e-86	9.87e-83	2.67593	6.18895
ENSMUST00000027144	5.11e-86	1.08e-82	2.8767	5.46612
ENSMUST00000065090	1.06e-85	2.18e-82	7.13687	2.87533
ENSMUST00000041993	1.72e-85	3.43e-82	1.9044	6.28381
ENSMUST00000063292	5.26e-82	1.02e-78	3.92183	4.7552
ENSMUST00000094794	3.6e-79	6.81e-76	2.62717	5.47702
ENSMUST00000030840	1.56e-78	2.88e-75	2.35122	5.7141
ENSMUST00000049149	3.92e-78	7.06e-75	1.26496	7.55985
ENSMUST00000027455	1.54e-77	2.71e-74	7.04006	2.82688
ENSMUST00000061923	3.86e-77	6.61e-74	3.6601	4.94104
ENSMUST00000024782	1.65e-75	2.76e-72	5.32126	4.69484
ENSMUST00000028624	5.04e-75	8.05e-72	3.02876	4.73377
ENSMUST00000215775	5.04e-75	8.05e-72	3.02876	4.73377
ENSMUST00000031243	1.93e-74	3.03e-71	1.51451	6.89794
ENSMUST00000020366	7.77e-74	1.19e-70	1.72373	6.43571
ENSMUST00000074898	1.7e-73	2.55e-70	2.75965	5.41523
ENSMUST00000069960	3.63e-73	5.32e-70	2.7755	6.09344
ENSMUST00000069927	7.48e-73	1.08e-69	1.27238	7.35382
ENSMUST00000033255	9.04e-73	1.28e-69	1.09544	8.25756
ENSMUST00000044224	2.2e-72	3.04e-69	2.88766	4.98785
ENSMUST00000102825	8.45e-72	1.15e-68	1.90064	6.06595
ENSMUST00000036424	5.32e-71	7.09e-68	1.94834	5.94301
ENSMUST00000081399	6.57e-71	8.59e-68	1.60956	6.45928
ENSMUST00000048486	2.43e-70	3.12e-67	3.34792	4.97068
ENSMUST00000090856	1.87e-69	2.36e-66	0.993353	9.05256
ENSMUST00000024831	9.37e-69	1.16e-65	3.27376	4.84824
ENSMUST00000077136	1.53e-68	1.87e-65	1.45874	6.76186
ENSMUST00000034178	2.96e-68	3.55e-65	1.43316	6.76743
ENSMUST00000078490	2.02e-67	2.38e-64	6.8826	2.76563
ENSMUST00000023259	4.51e-67	5.23e-64	1.70259	6.20714
ENSMUST00000105511	5.67e-67	6.48e-64	3.45134	5.05848
ENSMUST00000206865	6.16e-67	6.92e-64	4.32813	4.47488
ENSMUST00000100179	3.57e-66	3.95e-63	1.84554	6.9053
ENSMUST00000102826	7.41e-66	8.08e-63	1.57043	6.47666
ENSMUST00000070380	1.1e-65	1.18e-62	2.29925	5.4256
ENSMUST00000020970	1.82e-64	1.92e-61	2.04604	5.8992
ENSMUST00000027565	2.08e-64	2.17e-61	2.98106	4.87624
ENSMUST00000103230	2.12e-64	2.18e-61	6.85146	2.73258
ENSMUST00000032766	6.17e-62	6.25e-59	2.4063	5.37245
ENSMUST00000175858	1.04e-61	1.04e-58	1.97441	5.84013
ENSMUST00000020040	1.53e-61	1.51e-58	4.79123	5.44329
ENSMUST00000088407	4.98e-61	4.84e-58	2.24205	5.49053
ENSMUST00000048605	2.84e-60	2.72e-57	2.49885	5.20674
ENSMUST00000075162	3.22e-60	3.05e-57	1.35966	7.23077
ENSMUST00000098758	1.75e-59	1.63e-56	-1.32809	6.81073
ENSMUST00000048444	2.91e-59	2.69e-56	2.68864	4.94591
ENSMUST00000072204	4.7e-59	4.28e-56	2.09634	5.56809
ENSMUST00000060500	1.25e-58	1.12e-55	-1.02669	7.85289
ENSMUST00000025685	1.64e-57	1.45e-54	1.2493	6.95277
ENSMUST00000022519	4.52e-57	3.97e-54	1.41078	6.56037
ENSMUST00000020672	6.5e-57	5.63e-54	1.76555	5.82302
ENSMUST00000011178	6.89e-57	5.9e-54	1.7062	5.99991
ENSMUST00000052126	8e-56	6.77e-53	1.99188	5.6154
ENSMUST00000020702	2.59e-55	2.17e-52	2.0178	5.65069
ENSMUST00000031181	5.01e-55	4.14e-52	2.0384	6.01697
ENSMUST00000041874	7.55e-55	6.17e-52	1.6104	6.19281
ENSMUST00000040999	5.25e-54	4.25e-51	2.42357	5.20754
ENSMUST00000029469	1.13e-53	9.03e-51	2.53541	4.98452
ENSMUST00000022639	1.27e-53	1.01e-50	2.38174	5.07116
ENSMUST00000109367	9.66e-53	7.56e-50	2.44867	5.33299
ENSMUST00000057814	1.51e-52	1.17e-49	1.60578	6.0173
ENSMUST00000138595	1.8e-52	1.38e-49	4.32165	4.40897
ENSMUST00000066780	2.87e-52	2.17e-49	1.46163	6.26755
ENSMUST00000003659	3.22e-52	2.41e-49	3.4574	4.64168
ENSMUST00000059707	5.49e-52	4.07e-49	1.48839	6.2325
ENSMUST00000145041	9.38e-52	6.89e-49	3.94659	4.60044
ENSMUST00000026084	1.16e-51	8.44e-49	3.45704	4.88257
ENSMUST00000042740	1.99e-51	1.43e-48	0.918382	8.10453
ENSMUST00000226484	5.47e-51	3.89e-48	3.34457	5.49778
ENSMUST00000041591	1.38e-50	9.74e-48	1.27821	6.9147
ENSMUST00000034172	3.7e-50	2.58e-47	1.46978	7.25901
ENSMUST00000044584	5.7e-50	3.94e-47	1.74167	5.68679
ENSMUST00000088448	8.97e-50	6.15e-47	2.23173	5.18293
ENSMUST00000164932	9.99e-50	6.78e-47	0.941088	7.84649
ENSMUST00000105287	1.47e-49	9.87e-47	-0.930092	8.12687
ENSMUST00000097801	3.18e-49	2.12e-46	-1.08297	7.18906
ENSMUST00000070756	9.1e-49	6.01e-46	2.34272	5.23714
ENSMUST00000088598	2.37e-48	1.55e-45	6.56445	2.58908
ENSMUST00000054825	2.4e-48	1.55e-45	1.21521	6.96465
ENSMUST00000114474	1.38e-47	8.86e-45	1.50056	6.10394
ENSMUST00000034874	1.39e-47	8.87e-45	2.86197	4.71654
ENSMUST00000006969	2.26e-47	1.43e-44	1.03684	7.2465
ENSMUST00000186014	2.44e-47	1.53e-44	2.69535	5.58101
ENSMUST00000208311	4.45e-47	2.76e-44	6.76354	2.68862
ENSMUST00000099241	4.95e-47	3.04e-44	2.3175	5.10002
ENSMUST00000121303	5.19e-47	3.17e-44	4.58242	5.0305
ENSMUST00000007317	5.31e-47	3.21e-44	1.14023	7.11501
ENSMUST00000017086	6.97e-47	4.18e-44	2.383	4.91322
ENSMUST00000055294	7.63e-47	4.54e-44	-0.852304	8.27832
ENSMUST00000027566	8.45e-47	4.98e-44	1.30753	6.42783
ENSMUST00000034903	1.37e-46	8e-44	0.948622	7.65115
ENSMUST00000031249	1.66e-46	9.62e-44	2.28507	4.8885
ENSMUST00000025797	3.58e-46	2.06e-43	2.843	4.69522
ENSMUST00000090558	3.75e-46	2.14e-43	1.21808	6.66245
ENSMUST00000023820	4.8e-46	2.72e-43	2.16899	5.10528
ENSMUST00000066674	5.48e-46	3.08e-43	1.22899	7.0704
ENSMUST00000000033	7.88e-46	4.4e-43	2.32406	5.71155
ENSMUST00000000219	1.33e-45	7.34e-43	6.74604	2.67987
ENSMUST00000041163	5.9e-45	3.24e-42	2.51152	4.80238
ENSMUST00000007280	6.28e-45	3.42e-42	0.90945	7.75277
ENSMUST00000020399	8.82e-45	4.77e-42	1.37896	6.45751
ENSMUST00000112022	1.08e-44	5.78e-42	1.96777	5.3144
ENSMUST00000046745	1.76e-44	9.36e-42	0.953767	7.58944
ENSMUST00000040404	4.86e-44	2.57e-41	0.904748	8.10486
ENSMUST00000033185	4.99e-44	2.62e-41	2.21523	4.86393
ENSMUST00000039178	6.42e-44	3.35e-41	1.88633	5.5121
ENSMUST00000004480	9.66e-44	5e-41	3.43599	4.20048
ENSMUST00000084509	1.47e-43	7.5e-41	2.00315	6.33201
ENSMUST00000020190	1.46e-43	7.5e-41	1.68909	7.06157
ENSMUST00000049787	1.73e-43	8.74e-41	2.30488	4.91987
ENSMUST00000026378	2.42e-43	1.22e-40	3.5107	4.40857
ENSMUST00000095208	2.53e-43	1.26e-40	2.33186	4.78213
ENSMUST00000107517	2.53e-43	1.26e-40	6.45355	2.53363
ENSMUST00000080126	3.19e-43	1.57e-40	1.51608	5.9183
ENSMUST00000029671	8.48e-43	4.15e-40	1.42442	6.08528
ENSMUST00000048452	9.69e-43	4.71e-40	2.71093	4.53179
ENSMUST00000100554	9.8e-43	4.73e-40	1.64429	5.91738
ENSMUST00000034189	1.44e-42	6.9e-40	3.22562	4.59137
ENSMUST00000096570	2.51e-42	1.19e-39	1.16306	6.62906
ENSMUST00000114366	2.88e-42	1.36e-39	1.4579	5.98596
ENSMUST00000077004	9.47e-42	4.45e-39	1.93433	5.75986
ENSMUST00000025803	1.94e-41	9.02e-39	2.24788	5.3028
ENSMUST00000077667	1.94e-41	9.02e-39	4.12165	4.23731
ENSMUST00000111879	2.93e-41	1.35e-38	3.67752	4.20527
ENSMUST00000024826	3.66e-41	1.67e-38	1.86743	5.22237
ENSMUST00000034723	5.56e-41	2.53e-38	2.6458	4.62493
ENSMUST00000004140	6.38e-41	2.89e-38	1.01043	7.21505
ENSMUST00000032710	8.65e-41	3.89e-38	2.2352	4.85701
ENSMUST00000141255	9.2e-41	4.11e-38	2.77863	4.75386
ENSMUST00000043141	9.47e-41	4.2e-38	1.78772	5.51133
ENSMUST00000080718	1.07e-40	4.73e-38	1.10591	6.72291
ENSMUST00000087441	1.62e-40	7.12e-38	1.85024	6.17577
ENSMUST00000017348	2.98e-40	1.3e-37	1.0678	6.80435
ENSMUST00000007275	3.06e-40	1.33e-37	7.38217	3.55365
ENSMUST00000028239	3.69e-40	1.59e-37	0.856324	8.46962
ENSMUST00000025554	3.74e-40	1.6e-37	1.84216	5.26566
ENSMUST00000022120	5.01e-40	2.13e-37	-1.40039	6.13965
ENSMUST00000045173	8.04e-40	3.4e-37	1.22079	6.55475
ENSMUST00000078680	9.44e-40	3.97e-37	1.90137	5.33409
ENSMUST00000081945	9.9e-40	4.14e-37	2.50789	4.6966
ENSMUST00000035799	1.03e-39	4.3e-37	1.56624	5.712
ENSMUST00000024011	1.21e-39	5.01e-37	1.83851	5.27724
ENSMUST00000077925	4.31e-39	1.77e-36	1.32625	6.28292
ENSMUST00000106247	6.42e-39	2.62e-36	1.85064	5.25853
ENSMUST00000019266	6.55e-39	2.66e-36	0.843654	7.70934
ENSMUST00000064606	8.02e-39	3.24e-36	1.18114	6.47461
ENSMUST00000044833	1.17e-38	4.71e-36	1.03323	6.85488
ENSMUST00000029658	1.24e-38	4.94e-36	1.39581	6.15492
ENSMUST00000122120	1.38e-38	5.48e-36	-1.11997	7.14353
ENSMUST00000034231	2.59e-38	1.02e-35	1.18769	8.07946
ENSMUST00000040380	3.48e-38	1.37e-35	-0.920909	7.90041
ENSMUST00000077354	3.91e-38	1.53e-35	2.24214	4.85362
ENSMUST00000215405	4.12e-38	1.6e-35	1.45401	6.02404
ENSMUST00000028161	6.66e-38	2.58e-35	4.36536	4.06154
ENSMUST00000028986	1.19e-37	4.6e-35	3.45796	4.35564
ENSMUST00000029078	1.25e-37	4.79e-35	1.43232	5.8812
ENSMUST00000040069	1.26e-37	4.79e-35	-0.862852	7.53512
ENSMUST00000034751	1.36e-37	5.15e-35	1.73397	5.30025
ENSMUST00000028999	1.49e-37	5.61e-35	-0.723175	9.02839
ENSMUST00000145975	1.62e-37	6.09e-35	2.66837	6.28613
ENSMUST00000009329	2.87e-37	1.07e-34	1.62036	5.58426
ENSMUST00000100691	5.1e-37	1.89e-34	2.01929	5.9389
ENSMUST00000070449	5.56e-37	2.05e-34	3.69725	4.38055
ENSMUST00000022433	5.79e-37	2.12e-34	1.65414	5.36373
ENSMUST00000115428	7.24e-37	2.64e-34	4.08058	4.00283
ENSMUST00000089832	8.18e-37	2.97e-34	1.9552	4.89491
ENSMUST00000022641	8.81e-37	3.19e-34	3.18559	4.17092
ENSMUST00000025271	1.16e-36	4.18e-34	2.06453	4.73771
ENSMUST00000143380	1.17e-36	4.18e-34	1.02639	6.7802
ENSMUST00000025381	1.28e-36	4.57e-34	1.26661	6.80819
ENSMUST00000004201	1.6e-36	5.66e-34	1.09272	7.75334
ENSMUST00000068569	2.06e-36	7.27e-34	0.805394	7.96011
ENSMUST00000092995	2.6e-36	9.12e-34	1.84554	5.07591
ENSMUST00000098272	2.69e-36	9.39e-34	2.88283	4.46262
ENSMUST00000029975	4.72e-36	1.64e-33	2.15986	4.82946
ENSMUST00000019906	5.99e-36	2.07e-33	6.26527	2.43949
ENSMUST00000024939	7.3e-36	2.51e-33	6.28515	4.29455
ENSMUST00000080953	9.95e-36	3.41e-33	1.37578	5.92948
ENSMUST00000033846	9.99e-36	3.41e-33	2.1808	4.80852
ENSMUST00000088592	1.01e-35	3.41e-33	3.61343	4.02192
ENSMUST00000131996	1.64e-35	5.55e-33	-0.712226	8.93489
ENSMUST00000027650	2.41e-35	8.1e-33	1.02583	6.74479
ENSMUST00000165341	3.8e-35	1.27e-32	3.77926	4.04216
ENSMUST00000031326	5.56e-35	1.85e-32	1.38661	6.09759
ENSMUST00000102765	6.34e-35	2.1e-32	2.71722	4.31439
ENSMUST00000159861	6.91e-35	2.28e-32	-0.765376	8.88137
ENSMUST00000096433	2.02e-34	6.65e-32	0.9534	7.08295
ENSMUST00000029876	2.07e-34	6.76e-32	1.11529	6.42137
ENSMUST00000088921	2.22e-34	7.24e-32	6.80724	3.2672
ENSMUST00000113027	4.1e-34	1.33e-31	1.32282	6.56993
ENSMUST00000066834	4.42e-34	1.42e-31	2.1706	4.85441
ENSMUST00000038382	4.52e-34	1.45e-31	-0.689382	9.38084
ENSMUST00000113437	5.52e-34	1.76e-31	0.88337	7.45418
ENSMUST00000030044	6.07e-34	1.93e-31	0.913399	7.07318
ENSMUST00000093925	6.7e-34	2.12e-31	2.97088	4.19938
ENSMUST00000023435	7.58e-34	2.39e-31	0.848099	7.34274
ENSMUST00000007156	9.56e-34	3e-31	0.903085	7.13041
ENSMUST00000046285	1.02e-33	3.2e-31	2.20628	4.56534
ENSMUST00000023718	1.07e-33	3.32e-31	2.31759	5.0298
ENSMUST00000078835	1.32e-33	4.09e-31	1.42819	5.70537
ENSMUST00000085797	2.09e-33	6.46e-31	5.91215	4.0578
ENSMUST00000086521	3.18e-33	9.78e-31	1.9108	5.67534
ENSMUST00000207678	3.35e-33	1.03e-30	-0.999393	6.88095
ENSMUST00000030508	3.9e-33	1.19e-30	1.88004	5.05639
ENSMUST00000041531	5.2e-33	1.58e-30	4.13051	3.87249
ENSMUST00000044602	6.1e-33	1.84e-30	2.06971	4.67355
ENSMUST00000078357	8.64e-33	2.6e-30	0.815396	7.44097
ENSMUST00000005933	9.17e-33	2.75e-30	1.28831	6.5565
ENSMUST00000034435	1.04e-32	3.11e-30	1.87254	5.83961
ENSMUST00000094844	1.05e-32	3.13e-30	2.79364	4.48247
ENSMUST00000023840	1.24e-32	3.66e-30	1.01663	6.65177
ENSMUST00000062945	1.95e-32	5.74e-30	1.06525	6.54191
[truncated: 7,533 more rows]

## Sheet: Supp. Table 7
gene_id	gene_name	tau	sources
[truncated: 674 more rows]

[truncated: 2 more sheets: Supp. Table 10, Supp. Table 11]
